# Supplementary material for: Quantitative Proteomic Profiling of Tachyplesin I Targets in U251 Gliomaspheres
Source: Mar Drugs. 2017 Jan 18;15(1):20. doi: 10.3390/md15010020 (PMC5295240; doi:10.3390/md15010020)
Supplement: Supplementary file 1 [file marinedrugs-15-00020-s001.xlsx]

## Sheet: Table S1
Table S1. Total identified peptides information in the forward dimethyl labeling experiment.
Sequence	Protein Group Accessions	Modifications	MH+ [Da]	Heavy/Light	Heavy/Medium	Medium/Light	q-Value	Missed Cleavages
AIFTGHSAVVEDVAWHLLHESLFGSVADDQK	Q16576	N-Term(Dimethyl); K31(Dimethyl)	3434.74	0.991395	0.945114	1.05534	0	0
NDPPMEAAGFTAQVIILNHPGQISAGYAPVLDCHTAHIACK	P68104	N-Term(Dimethyl); C33(Carbamidomethyl); C40(Carbamidomethyl); K41(Dimethyl)	4441.17	1.11608	1.20658	0.930604	0	0
GLQSIFQEQGMAESVHTWQDHGYLATYTNK	P52788	N-Term(Dimethyl); K30(Dimethyl)	3495.66	1.27206	2.26563	0.564864	0	0
FQSAAIGALQEASEAYLVGLFEDTNLCAIHAK	K7EK07	N-Term(Dimethyl); C27(Carbamidomethyl); K32(Dimethyl)	3493.75	1.21005	1.57315	0.812382	0	0
LHEEEIQELQAQIQEQHVQIDVDVSKPDLTAALR	P08670	N-Term(Dimethyl); K26(Dimethyl)	3979.07		0.811474		0	0
SNKPIHTIILNPHVHLVGDDAACIAYIR	D6R938;E9PBG7	N-Term(Dimethyl); K3(Dimethyl); C23(Carbamidomethyl)	3193.73				0	0
FSFSGNTLVSSSADPEGHFETPIWIER	Q14697;E9PKU7	N-Term(Dimethyl)	3038.44				0	0
HVGDLGNVTADKDGVADVSIEDSVISLSGDHCIIGR	P00441	N-Term(Dimethyl); K12(Dimethyl); C32(Carbamidomethyl)	3776.85	1.25369	4.11707	0.306359	0	1
VIHDNFGIVEGLMTTVHAITATQK	P04406	N-Term(Dimethyl); K24(Dimethyl)	2651.42	0.497176	0.61124	0.900364	0	0
IGEMPLTDSILCDGLTDAFHNCHMGITAENVAK	Q9BWD1	N-Term(Dimethyl); C12(Carbamidomethyl); C22(Carbamidomethyl); K33(Dimethyl)	3686.73				0	0
VGKDELFALEQSCAQVVLQAANER	Q16658	N-Term(Dimethyl); K3(Dimethyl); C13(Carbamidomethyl)	2731.4	1.29929	1.66209	0.786466	0	1
NWRDPDQTDGLGLSYLSSHIANVER	A0A0A0MS51	N-Term(Dimethyl)	2871.4	1.27844	1.6685	0.770873	0	1
TAAGLMHTFNAHAATDITGFGILGHAQNLAK	P49903	N-Term(Dimethyl); K31(Dimethyl)	3205.65	1.03612	1.45974	0.714099	0	0
HIADLAGNSEVILPVPAFNVINGGSHAGNK	P06733	N-Term(Dimethyl); N22(Deamidated); K30(Dimethyl)	3068.61	1.47717	1.67763	0.89747	0	0
FQSSAVMALQEACEAYLVGLFEDTNLCAIHAK	P68431	N-Term(Dimethyl); C13(Carbamidomethyl); C27(Carbamidomethyl); K32(Dimethyl)	3642.75	0.681808	1.05728	0.648786	0	0
TVSLGAGAKDELHIVEAEAMNYEGSPIK	P06748	N-Term(Dimethyl); K9(Dimethyl); K28(Dimethyl)	3013.55	0.909571	0.869167	1.04768	0	1
FTLDCTHPVEDGIMDAANFEQFLQER	P35268	N-Term(Dimethyl); C5(Carbamidomethyl)	3111.41	1.27228	0.982311	1.30305	0	0
AITVFSPDGHLFQVEYAQEAVKK	O14818	N-Term(Dimethyl); K22(Dimethyl); K23(Dimethyl)	2661.42	1.01432	1.18353	0.862229	0	1
ALSDHHIYLEGTLLKPNMVTPGHACTQK	P04075	N-Term(Dimethyl); K15(Dimethyl); C25(Carbamidomethyl); K28(Dimethyl)	3215.66	0.857723	1.29446	0.661737	0	0
ESESCDCLQGFQLTHSLGGGTGSGMGTLLISK	Q9BVA1;Q13885	N-Term(Dimethyl); C5(Carbamidomethyl); C7(Carbamidomethyl); K32(Dimethyl)	3383.59				0	0
TNISDEESEQATEMLVHNAQNLMQSVK	P18206	N-Term(Dimethyl); K27(Dimethyl)	3102.45	0.858373	0.774132	1.11555	0	0
AALAGGTTMIIDHVVPEPESSLTEAYEK	Q14195	N-Term(Dimethyl); K28(Dimethyl)	2985.51	0.956678	1.34623	0.720339	0	0
LTKEEIVDKYDLFVGSQATDFGEALVR	O43852	N-Term(Dimethyl); K3(Dimethyl); K9(Dimethyl)	3127.64	1.03172	0.737427	1.40757	0	2
AVDHINSTIAPALISSGLSVVEQEKLDNLMLELDGTENK	P09104	N-Term(Dimethyl); K25(Dimethyl); K39(Dimethyl)	4248.22	1.65555	2.416	0.689403	0	1
SKDDQVTVIGAGVTLHEALAAAELLKK	P29401	N-Term(Dimethyl); K2(Dimethyl); K26(Dimethyl); K27(Dimethyl)	2889.65	1.04039	1.19383	0.849876	0	2
AEGSDVANAVLDGADCIMLSGETAK	P14618;H3BR70	N-Term(Dimethyl); C16(Carbamidomethyl); K25(Dimethyl)	2550.19				0	0
AYHEQLSVAEITNACFEPANQMVK	P68363	N-Term(Dimethyl); C15(Carbamidomethyl); K24(Dimethyl)	2806.35	1.12695	1.32157	0.957663	0	0
MQMNTNQLTSIHADLCQLCLLAK	Q9UNS2	N-Term(Dimethyl); C16(Carbamidomethyl); C19(Carbamidomethyl); K23(Dimethyl)	2759.36	0.943173	0.944281	1.00489	0	0
ETAIELGYLTAEQFDEWVKPK	P07954	N-Term(Dimethyl); K19(Dimethyl); K21(Dimethyl)	2551.33	0.900347	0.958431	0.945098	0	0
LVEGILHAPDAGWGNLVYVVNYPK	Q13148	N-Term(Dimethyl); K24(Dimethyl)	2680.45	0.975644	1.02223	0.960216	0	0
DIQNTQCLLNVEHLSAGCPHVTLQFADSK	Q7KZF4	N-Term(Dimethyl); C7(Carbamidomethyl); C18(Carbamidomethyl); K29(Dimethyl)	3351.64	1.14718	1.05715	1.09175	0	0
SIVDYKPNLDLLEQQHQLIQEALIFDNK	O43707	N-Term(Dimethyl); K6(Dimethyl); K28(Dimethyl)	3408.84				0	0
TEGNIDDSLIGGNASAEGPEGEGTESTVITGVDIVMNHHLQETSFTK	P13693	N-Term(Dimethyl); K47(Dimethyl)	4913.31				0	0
ETFASTASQLHSNVVNYVQQIVAPK	Q9H4A4	N-Term(Dimethyl); K25(Dimethyl)	2787.46	1.07399	1.31804	0.819778	0	0
APVSALPLAPNHLGGGAVVLGAESHASK	Q13190	N-Term(Dimethyl); K28(Dimethyl)	2676.48	1.15443	1.02294	1.1354	0	0
LFNHLSAVSESIQALGWVAMAPKPGPYVK	Q01518	N-Term(Dimethyl); K23(Dimethyl); K29(Dimethyl)	3194.73	1.45853	1.13544	1.29234	0	0
QTIGNSCGTIGLIHAVANNQDKLGFEDGSVLK	P09936	N-Term(Dimethyl); C7(Carbamidomethyl); K22(Dimethyl); K32(Dimethyl)	3440.77	1.63825	1.13656	1.22951	0	1
FQSSAVMALQEACEAYLVGLFEDTNLCAIHAK	P68431	N-Term(Dimethyl); M7(Oxidation); C13(Carbamidomethyl); C27(Carbamidomethyl); K32(Dimethyl)	3658.75	0.859265	1.09151	0.792004	0	0
AFAMIIDKLEEDINSSMTNSTAASRPPVTLR	Q15365	N-Term(Dimethyl); K8(Dimethyl)	3434.76	1.10312	1.19947	0.92525	0	1
LHEEEIQELQAQIQEQHVQIDVDVSKPDLTAALR	P08670		3923.01				0	0
AKVDEFPLCGHMVSDEYEQLSSEALEAAR	X1WI28	N-Term(Dimethyl); K2(Dimethyl); C9(Carbamidomethyl)	3337.56	0.966777	1.00877	0.964185	0	1
VLGAHILGPGAGEMVNEAALALEYGASCEDIAR	P09622	N-Term(Dimethyl); C28(Carbamidomethyl)	3382.67				0	0
RQVQSLTCEVDALKGTNESLER	P08670	N-Term(Dimethyl); C8(Carbamidomethyl); K14(Dimethyl)	2589.32	0.949753	0.864675	1.10506	0	2
AEGSDVANAVLDGADCIMLSGETAKGDYPLEAVR	P14618;H3BR70	N-Term(Dimethyl); C16(Carbamidomethyl); K25(Dimethyl)	3550.69				0	1
GVNADKVGIEAAEMLLANLR	O00442	N-Term(Dimethyl); K6(Dimethyl)	2140.17	0.950983	0.973732	0.982564	0	1
IVKPNGEKPDEFESGISQALLELEMNSDLK	P62081	N-Term(Dimethyl); K3(Dimethyl); K8(Dimethyl); K30(Dimethyl)	3442.8	0.942879	1.09047	0.913342	0	0
TAMSTPHVAEPAENEQDEQDENGAEASADLR	P26038	N-Term(Dimethyl)	3340.45		1.08481		0	0
VLKPNFAAAWEEVGDTFEKEETFALSSTK	Q9UBF2	N-Term(Dimethyl); K3(Dimethyl); K19(Dimethyl); K29(Dimethyl)	3356.71				0	1
EAESCDCLQGFQLTHSLGGGTGSGMGTLLLSK	P68371;P07437;P04350	N-Term(Dimethyl); C5(Carbamidomethyl); C7(Carbamidomethyl); K32(Dimethyl)	3367.59				0	0
HTGPGILSMANAGPNTNGSQFFICTAK	P62937	N-Term(Dimethyl); C24(Carbamidomethyl); K27(Dimethyl)	2847.38				0	0
VILALGDYMGATCHACIGGTNVR	Q14240	N-Term(Dimethyl); C13(Carbamidomethyl); C16(Carbamidomethyl)	2477.2	1.56704	1.56747	1.00579	0	0
LQLNGNLQLELAQVLAQERPK	P49327	N-Term(Dimethyl); N4(Deamidated); K21(Dimethyl)	2432.38				0	0
AFLADPSAFVAAAPVAAATTAAPAAAAAPAKVEAK	P05388	N-Term(Dimethyl); K31(Dimethyl); K35(Dimethyl)	3263.8			1.24699	0	1
GAGYTFGQDISETFNHANGLTLVSR	P67775;P62714	N-Term(Dimethyl)	2683.31				0	0
EVEAVIPDHCIFASNTSALPISEIAAVSK	P40939	N-Term(Dimethyl); C10(Carbamidomethyl); K29(Dimethyl)	3124.61	1.16798	0.928763	1.26519	0	0
VGKDELFALEQSCAQVVLQAANER	Q16658	N-Term(Dimethyl); K3(Dimethyl); Q11(Deamidated); C13(Carbamidomethyl)	2732.4				0	1
SIYVGNVDYGATAEELEAHFHGCGSVNR	B4DEH8	N-Term(Dimethyl); C23(Carbamidomethyl)	3080.42	1.24259	1.19345	1.04749	0	0
DLGLSESGEDVNAAILDESGKK	P13667	N-Term(Dimethyl); K21(Dimethyl); K22(Dimethyl)	2331.18	1.08722	1.07795	1.05273	0	1
LKPYFLTDGTGTVTPANASGINDGAAAVVLMK	Q9BWD1	N-Term(Dimethyl); K2(Dimethyl); K32(Dimethyl)	3276.75	0.744529	0.649993	1.15239	0	0
SLADELALVDVLEDKLK	P07195	N-Term(Dimethyl); K15(Dimethyl); K17(Dimethyl)	1955.12	1.08293	1.26554	0.860894	0	1
QTASVTLQAIAAQNAAVQAVNAHSNILK	B9A067	N-Term(Dimethyl); K28(Dimethyl)	2888.58	0.917804	0.788454	1.17112	0	0
THSDSKPYGPMSVGLDFSLPGMEHVYGIPEHADNLR	Q14697;E9PKU7	N-Term(Dimethyl); K6(Dimethyl)	4009.92				0	0
QAQILASEAEKAEQINQAAGEASAVLAK	Q9UJZ1	N-Term(Dimethyl); K11(Dimethyl); K28(Dimethyl)	2923.58	0.793927	0.778527	1.02597	0	1
FENAFLSHVVSQHQALLGTIR	P25705	N-Term(Dimethyl)	2395.28				0	0
MMVDKDGDVTVTNDGATILSMMDVDHQIAK	P48643	N-Term(Dimethyl); K5(Dimethyl); K30(Dimethyl)	3334.59	1.02789	0.926219	1.11651	0	1
HTGPGILSMANAGPNTNGSQFFICTAK	P62937	N-Term(Dimethyl); N17(Deamidated); C24(Carbamidomethyl); K27(Dimethyl)	2848.37	1.5891	1.58316	1.2627	0	0
SLAGSSGPGASSGTSGDHGELVVR	E9PK01	N-Term(Dimethyl)	2213.07	0.958262	0.94851	1.00525	0	0
FISDKDASIVGFFDDSFSEAHSEFLK	P30101	N-Term(Dimethyl); K5(Dimethyl); K26(Dimethyl)	3022.46	1.5518	1.61065	0.96931	0	1
VAEEHAPSIVFIDEIDAIGTKR	P62191	N-Term(Dimethyl); K21(Dimethyl)	2466.32				0	1
QDLLTAAPASEIAEGLNLHTIR	P36405	N-Term(Dimethyl)	2361.27				0	0
ILTVEDHYYEGGIGEAVSSAVVGEPGITVTHLAVNR	P29401	N-Term(Dimethyl)	3780.92	1.31845	1.1815	1.12269	0	0
SWVNQMESQTGEASKLPYDVTPEQALAHEEVK	P46940	N-Term(Dimethyl); K15(Dimethyl); K32(Dimethyl)	3685.8	1.22935	1.82688		0	1
GILGYTEHQVVSSDFNSDTHSSTFDAGAGIALNDHFVK	P04406	N-Term(Dimethyl); K38(Dimethyl)	4092.95	1.57552	1.83691	0.89096	0	0
HLNFLTSEQALADFAELIK	P42785	N-Term(Dimethyl); K19(Dimethyl)	2216.19	1.26923	1.79712	0.710544	0	0
NAATEDLWESLENASGKPIAAVMNTWTK	E9PLK3	N-Term(Dimethyl); K17(Dimethyl); K28(Dimethyl)	3131.57	1.18701	1.48273	0.805413	0	0
QNLLQAAGNVGQASGELLQQIGESDTDPHFQDALMQLAK	Q9Y490	N-Term(Dimethyl); K39(Dimethyl)	4192.1				0	0
TIESILEPVAQQISHLVIMHEEGEVDGK	P18206	N-Term(Dimethyl); K28(Dimethyl)	3157.65	0.952078	0.864927	1.10815	0	0
NMITGTSQADCAVLIVAAGVGEFEAGISK	P68104;Q05639	N-Term(Dimethyl); C11(Carbamidomethyl); K29(Dimethyl)	2965.49				0	0
EAGLAHLCEFIEDCEHTVLATK	Q9UBF2	N-Term(Dimethyl); C8(Carbamidomethyl); C14(Carbamidomethyl); K22(Dimethyl)	2599.25	1.15249	1.24311	0.932731	0	0
VETGVLKPGMVVTFAPVNVTTEVK	P68104	N-Term(Dimethyl); K7(Dimethyl); K24(Dimethyl)	2599.47	0.694274	1.09908	0.817737	0	0
LVQDYGLESEVAQHLAATYGDK	P43304	N-Term(Dimethyl); K22(Dimethyl)	2463.23	0.9097	0.752205	1.21672	0	0
IMRPTDVPDTGLLCDLLWSDPDKDVQGWGENDR	P62140	N-Term(Dimethyl); C14(Carbamidomethyl); K23(Dimethyl)	3869.84	0.97777	0.995617	0.988035	0	1
AAVSHWQQQSYLDSGIHSGATTTAPSLSGK	B4DGU4	N-Term(Dimethyl); K30(Dimethyl)	3141.55	1.02141	1.04229	0.98591	0	0
FRCPEALFQPSFLGMESCGIHETTFNSIMK	P60709	N-Term(Dimethyl); C3(Carbamidomethyl); C18(Carbamidomethyl); K30(Dimethyl)	3590.68				0	1
VELSEQQLQLWPSDVDKLSPTDNLPR	P09543	N-Term(Dimethyl); K17(Dimethyl)	3063.59	1.12614	1.25277	0.904379	0	1
VANILHDDCAFLSAFGDVSKPER	Q9BS26	N-Term(Dimethyl); C9(Carbamidomethyl); K20(Dimethyl)	2617.3	1.33305	1.30596	1.02694	0	0
TQSSASLAASYAAQQHPQAAASYR	Q96PK6	N-Term(Dimethyl)	2493.22	1.00798	1.09694	0.924479	0	0
MLEMGITGPEGHVLSRPEELEAEAVFR	Q14195	N-Term(Dimethyl)	3025.5	1.52361	1.35181	1.13393	0	0
HIAQLAGNSDLILPVPAFNVINGGSHAGNK	P09104	N-Term(Dimethyl); N22(Deamidated); K30(Dimethyl)	3081.63	1.6503	2.31246	0.717989	0	0
QLHEQAMQFGQLLTHLDTTQQMIANSLK	Q13561	N-Term(Dimethyl); K28(Dimethyl)	3280.68	1.14436	1.16149	0.991224	0	0
FQSSAVMALQEASEAYLVGLFEDTNLCAIHAK	Q71DI3	N-Term(Dimethyl); C27(Carbamidomethyl); K32(Dimethyl)	3569.76	0.964474	1.16129	0.884638	0	0
VLQQTLNYINQGVSHALTWK	O95373	N-Term(Dimethyl); K20(Dimethyl)	2369.29	0.72366	0.899218	0.80965	0	0
QVASHVGLHSASIPGILALDLCPSDTNK	Q9UMS4	N-Term(Dimethyl); C22(Carbamidomethyl); K28(Dimethyl)	2956.55	1.00875	1.045	0.97117	0	0
SAGQGEVLVYVEDPAGHQEEAK	P21333	N-Term(Dimethyl); K22(Dimethyl)	2369.16	0.770065	0.798539	0.9225	0	0
GMGGHGYGGAGDASSGFHGGHFVHMR	P31942	N-Term(Dimethyl)	2571.11				0	0
LHEEEIQELQAQIQEQHVQIDVDVSKPDLTAALR	P08670	N-Term(Dimethyl); Q10(Deamidated); Q12(Deamidated); K26(Dimethyl)	3981.06	0.742943	0.74008	1.00996	0	0
LADDVDLEQVANETHGHVGADLAALCSEAALQAIR	P55072	N-Term(Dimethyl); N12(Deamidated); C26(Carbamidomethyl)	3701.82	1.29316	1.04926	1.23992	0	0
QQWFDLFSDVHAVCLWDDKGPAK	Q93034	N-Term(Dimethyl); C14(Carbamidomethyl); K19(Dimethyl); K23(Dimethyl)	2846.39	2.01899	2.26148	0.898194	0	1
TEETATEMLTSELQTQAHVIK	Q02952	N-Term(Dimethyl); K21(Dimethyl)	2416.22	0.825266	0.67542	1.22927	0	0
STGLILDSGATHTTAIPVHDGYVLQQGIVK	O96019	N-Term(Dimethyl); K30(Dimethyl)	3147.69	0.954011	1.11506	0.860765	0	0
GPSFDVQVGLHELLGHGSGK	Q9NY33	N-Term(Dimethyl); K20(Dimethyl)	2090.1	1.00517	1.10634	0.91407	0	0
LATPTYGDLNHLVSATMSGVTTSLR	Q13509	N-Term(Dimethyl)	2633.35	1.29439	1.46075	0.891496	0	0
NSSYVHGGVDASGKPQEAVYGQNDIHHK	Q9UN86	N-Term(Dimethyl); K14(Dimethyl); K28(Dimethyl)	3078.5	0.784742	0.859311	0.918764	0	0
LVNWSCTLNSAISDIEVDKK	P26640	N-Term(Dimethyl); C6(Carbamidomethyl); K19(Dimethyl); K20(Dimethyl)	2376.24				0	1
YASICQQNGIVPIVEPEILPDGDHDLKR	P04075	N-Term(Dimethyl); C5(Carbamidomethyl); N8(Deamidated); K27(Dimethyl)	3233.64	1.2787	2.19634	0.585731	0	1
ALAPTWEQLALGLEHSETVK	Q86UY0	N-Term(Dimethyl); K20(Dimethyl)	2249.21	1.32513			0	0
LNEDMACSVAGITSDANVLTNELR	P25789	N-Term(Dimethyl); C7(Carbamidomethyl)	2621.25	1.19414	1.18608	1.0129	0	0
GVAGAHGLLCLLSDHVDKR	Q9UBQ7	N-Term(Dimethyl); C10(Carbamidomethyl); K18(Dimethyl)	2074.12	1.09656	1.17088	0.94221	0	1
QSPDHPTVGAGVLHITENGPTEVDYSPSDMQDSSLSHK	P46821	N-Term(Dimethyl); K38(Dimethyl)	4088.9	1.07544	0.885868	1.22136	0	0
CFGFVTYSNVEEADAAMAASPHAVDGNTVELKR	Q13151	N-Term(Dimethyl); C1(Carbamidomethyl); K32(Dimethyl)	3612.7	1.07698	1.29439	0.837086	0	1
YLAEWMVHGYPSENVWELDLKR	Q8NCN5	N-Term(Dimethyl); K21(Dimethyl)	2791.38	0.938398	0.996712	0.947207	0	1
MLLADQGQSWKEEVVTVETWQEGSLK	P09211	N-Term(Dimethyl); K11(Dimethyl); K26(Dimethyl)	3075.57				0	1
SDPPQEAAQFTSQVIILNHPGQISAGYSPVIDCHTAHIACK	Q05639	N-Term(Dimethyl); Q13(Deamidated); Q22(Deamidated); C33(Carbamidomethyl); C40(Carbamidomethyl); K41(Dimethyl)	4516.22				0	0
IAALQAFADQLIAAGHYAK	Q13813	N-Term(Dimethyl); K19(Dimethyl)	2028.12	1.05249	1.17941	0.8978	0	0
MTATGSGENSTVAEHLIAQHSAIK	E7EM64	N-Term(Dimethyl); K24(Dimethyl)	2509.26	1.09301	1.15283	0.953866	0	0
GAHNGQGLGNAFLSHISACDGIFHLTR	Q9NTK5	N-Term(Dimethyl); N4(Deamidated); C19(Carbamidomethyl)	2879.4	1.29399	1.4335	0.908154	0	0
DNTIEHLLPLFLAQLKDECPEVR	P30153	N-Term(Dimethyl); K16(Dimethyl); C19(Carbamidomethyl)	2806.47	1.18034	1.21391	0.978247	0	1
YLALESMCTLASSEFSHEAVK	O94973;O95782	N-Term(Dimethyl); C8(Carbamidomethyl); K21(Dimethyl)	2429.17				0	0
QSKPVTTPEEIAQVATISANGDKEIGNIISDAMK	P10809	N-Term(Dimethyl); K3(Dimethyl); K23(Dimethyl); K34(Dimethyl)	3667.93				0	1
DITDTLVAVTISEGAHHLDLR	P42785	N-Term(Dimethyl)	2304.21	1.75963	2.09556	0.844791	0	0
TGDFQLHTNVNDGTEFGGSIYQK	A0A0A0MR02	N-Term(Dimethyl); K23(Dimethyl)	2584.23	0.755154	0.778032	0.976486	0	0
MVAAATNNLCEAANAAVQGHASQEK	Q9Y490	N-Term(Dimethyl); C10(Carbamidomethyl); K25(Dimethyl)	2612.25	1.07772	1.50487	0.720498	0	0
FTASAGIQVVGDDLTVTNPKR	P06733	N-Term(Dimethyl); K20(Dimethyl)	2245.21	1.13587	2.26579	0.563171	0	1
AGYTDKVVIGMDVAASEFFR	P06733	N-Term(Dimethyl); K6(Dimethyl)	2232.13	1.29597	1.75987	0.740868	0	1
FQEHLQLQNLGINPANIGFSTLTMESDKFICIR	Q00610	N-Term(Dimethyl); K28(Dimethyl); C31(Carbamidomethyl)	3890.99	1.49513	1.37623	1.09299	0	1
AFQYVETHGEVCPANWTPDSPTIKPSPAASK	P30048	N-Term(Dimethyl); C12(Carbamidomethyl); K24(Dimethyl); K31(Dimethyl)	3469.71	0.823818	0.771308	1.07456	0	0
GPLINSEFYTGWLDHWGQPHSTIK	P16278	N-Term(Dimethyl); K24(Dimethyl)	2839.42	1.64963	2.55717	0.649017	0	0
CFEKNEAIQAAHDAVAQEGQCR	P09936	N-Term(Dimethyl); C1(Carbamidomethyl); K4(Dimethyl); C21(Carbamidomethyl)	2588.19			0.341435	0	1
VHTVEDYQAIVDAEWNILYDKLEK	Q99832	N-Term(Dimethyl); K21(Dimethyl); K24(Dimethyl)	2975.53	1.18484	1.25095	0.952904	0	1
VIHDNFGIVEGLMTTVHAITATQK	P04406	N-Term(Dimethyl); N5(Deamidated); K24(Dimethyl)	2652.4				0	0
GTIVLASPGWTTHSISDGKDLEK	Q14914	N-Term(Dimethyl); K19(Dimethyl); K23(Dimethyl)	2496.33	1.02327	1.17545	0.875815	0	1
LVTEMGTYATQSALSSSRPTK	P53618	N-Term(Dimethyl); K21(Dimethyl)	2284.18	1.03111	1.28799	0.805418	0	0
VAILVDDMADTCGTICHAADK	P11908;P60891	N-Term(Dimethyl); C12(Carbamidomethyl); C16(Carbamidomethyl); K21(Dimethyl)	2332.1				0	0
VFTTQELVQAFTHAPATLEADR	O95433	N-Term(Dimethyl)	2473.26	1.15947	1.12999	1.03231	0	0
MAVTFIGNSTAIQELFKR	P07437	N-Term(Dimethyl); K17(Dimethyl)	2082.13	1.01551	1.1938	0.855817	0	1
AAQYQVNQAAAAQAAATAAAMTQSAVK	C9JP00	N-Term(Dimethyl); K27(Dimethyl)	2662.36				0	0
AYWQVHLDQVEVASGLTLCK	P07339	N-Term(Dimethyl); C19(Carbamidomethyl); K20(Dimethyl)	2373.22	2.16076	1.26795	1.71448	0	0
LLEMNLMHAPQVADAILGNQMFTHYDR	Q00610	N-Term(Dimethyl); Q11(Deamidated)	3157.54				0	0
IYKVPSTETEALASNLMGMFEK	P31150	N-Term(Dimethyl); K3(Dimethyl); K22(Dimethyl)	2543.3	1.18233			0	1
EAATAVEQEKEILLEMIHSIQNSQDMR	O95816	N-Term(Dimethyl); K10(Dimethyl)	3169.57	1.14855	1.04505	1.10571	0	1
ECENCDCLQGFQLTHSLGGGTGSGMGTLLISK	Q13509	N-Term(Dimethyl); C2(Carbamidomethyl); C5(Carbamidomethyl); C7(Carbamidomethyl); K32(Dimethyl)	3483.59				0	0
GQYISPFHDIPIYADKDVFHMVVEVPR	Q15181	N-Term(Dimethyl); K16(Dimethyl)	3228.65	1.37482	1.78435	0.775164	0	1
NQNVHMESEVYDTPENIVHGSGSQLFDHVAECLGDFMEK	P19367	N-Term(Dimethyl); C32(Carbamidomethyl); K39(Dimethyl)	4519.03				0	0
VVAEGFDSANGINISPDDKYIYVADILAHEIHVLEK	J3QT77	N-Term(Dimethyl); K19(Dimethyl); K36(Dimethyl)	4039.1				0	1
MYGISLCQAILDETKGDYEK	P04083	N-Term(Dimethyl); C7(Carbamidomethyl); K15(Dimethyl); K20(Dimethyl)	2418.19				0	1
QGSKDPAEGDGAQPEETPR	E9PKU7	N-Term(Dimethyl); K4(Dimethyl)	2024.94	0.935844	0.789243	1.0139	0	1
TALLDAAGVASLLTTAEVVVTEIPK	P10809	N-Term(Dimethyl); K25(Dimethyl)	2538.46	0.831193	0.867884	0.963536	0	0
QLLLTADDRVNPCIGGVILFHETLYQK	P04075	N-Term(Dimethyl); C13(Carbamidomethyl); K27(Dimethyl)	3169.7	1.26244	1.65322	0.768258	0	1
LELVHHGPMAVAFEVYDDFLHYKK	P53634	N-Term(Dimethyl); K23(Dimethyl); K24(Dimethyl)	2942.51	3.21889	4.71594	0.663167	0	1
CGDSHPESPVGFGHMSTTGCVLNK	A0A0C4DGS9	N-Term(Dimethyl); C1(Carbamidomethyl); C20(Carbamidomethyl); K24(Dimethyl)	2630.17	0.887089	1.03096	0.865671	0	0
ELINNELSHFLEEIKEQEVVDK	P04271	N-Term(Dimethyl); K15(Dimethyl); K22(Dimethyl)	2739.44	1.38021	1.21671	1.14126	0	1
GVSLTNHHFYDESKPFTCLDGSATIPFDQVNDDYCDCK	K7ELL7	N-Term(Dimethyl); K14(Dimethyl); C18(Carbamidomethyl); C35(Carbamidomethyl); C37(Carbamidomethyl); K38(Dimethyl)	4537.01	1.09378	1.34018	0.821096	0	0
TLTGTVIDSGDGVTHVIPVAEGYVIGSCIK	P61158	N-Term(Dimethyl); C28(Carbamidomethyl); K30(Dimethyl)	3114.63				0	0
LVSQTGPVHAPIFTMSVEVDGNSFEASGPSKK	Q12906	N-Term(Dimethyl); K31(Dimethyl); K32(Dimethyl)	3400.75	1.20843	1.32732	0.915951	0	1
GHDQSAYDGKDYIALNEDLSSWTAADTAAQITQR	P30491;P30466	N-Term(Dimethyl); K10(Dimethyl)	3767.78				0	1
NDEELNKLLGGVTIAQGGVLPNIQAVLLPK	Q8IUE6	N-Term(Dimethyl); K7(Dimethyl); K30(Dimethyl)	3197.84				0	1
VADNLAIQLAAVTEDKYEILQSVDDAAIVIK	Q12906	N-Term(Dimethyl); K16(Dimethyl); K31(Dimethyl)	3412.87	0.997088	1.4981	0.669606	0	1
TALHLATEMEELGLVTHLVTK	Q00653	N-Term(Dimethyl); K21(Dimethyl)	2362.3	1.11706	1.08629	1.03457	0	0
QAVDFLSNEGHIYSTVDDDHFK	P15927	N-Term(Dimethyl); K22(Dimethyl)	2593.22				0	0
CPEALFQPSFLGMESCGIHETTFNSIMK	P60709	N-Term(Dimethyl); C1(Carbamidomethyl); C16(Carbamidomethyl); K28(Dimethyl)	3287.52	1.09336	0.649401	1.69386	0	0
YADLTEDQLPSCESLKDTIAR	P18669	N-Term(Dimethyl); C12(Carbamidomethyl); K16(Dimethyl)	2481.21	1.63321	1.96833	0.959579	0	1
LSKEETVLATVQALQTASHLSQQADLR	P04844	N-Term(Dimethyl); K3(Dimethyl)	2993.61	0.97176	1.06114	0.921326	0	1
AFLADPSAFVAAAPVAAATTAAPAAAAAPAK	P05388	N-Term(Dimethyl); K31(Dimethyl)	2808.52	0.976406	0.945182	1.03154	0	0
SFIKDYPVVSIEDPFDQDDWGAWQK	P06733	N-Term(Dimethyl); K4(Dimethyl); K25(Dimethyl)	3069.48	2.47376	3.24202	0.767662	0	1
LKVEGYSGTAGDSMAYHNGR	P24821;J3QSU6	N-Term(Dimethyl); K2(Dimethyl); N18(Deamidated)	2170.02				0	1
YYALCGFGGVLSCGLTHTAVVPLDLVK	F8VVM2	N-Term(Dimethyl); C5(Carbamidomethyl); C13(Carbamidomethyl); K27(Dimethyl)	2966.54	0.832816	0.775814	1.07999	0	0
GPLTSGSDEENVALPLGDNVLTHNLGIPVLVVCTK	O43237	N-Term(Dimethyl); C33(Carbamidomethyl); K35(Dimethyl)	3684.95	0.838392	0.988029	0.8537	0	0
EAGICYASIAMATDYDCWKEHEEAVSVDR	Q13126	N-Term(Dimethyl); C5(Carbamidomethyl); C17(Carbamidomethyl); K19(Dimethyl)	3432.51	1.69573	2.62369	0.650237	0	1
EYYSEADASHCIQQILESVNHCHLNGIVHR	D6R938	N-Term(Dimethyl); C11(Carbamidomethyl); C22(Carbamidomethyl)	3607.67	1.63032	1.25935	1.30242	0	0
DVMQNHLLQMLCLVAMEKPASTNSDDVRDEK	P11413;E7EUI8	N-Term(Dimethyl); C12(Carbamidomethyl); K18(Dimethyl); K31(Dimethyl)	3671.78				0	1
SGETEDTFIADLVVGLCTGQIK	P13929;P09104;P06733	N-Term(Dimethyl); C17(Carbamidomethyl); K22(Dimethyl)	2409.22				0	0
LQQLFNHTMFILEQEEYQR	P35579;P35580	N-Term(Dimethyl)	2495.22				0	0
RWLPAGDALLQMITIHLPSPVTAQK	P13639	N-Term(Dimethyl); K25(Dimethyl)	2812.58	1.13656	1.13157	1.0105	0	1
AVYLGELPHDQDVVEYIMNQPNVVPR	Q9NYU2	N-Term(Dimethyl)	3023.52	1.01848	0.914112	1.12094	0	0
QAFTDVATGSLGQGLGAACGMAYTGK	P29401	N-Term(Dimethyl); C19(Carbamidomethyl); K26(Dimethyl)	2588.24	1.27116	1.28394	0.996056	0	0
GLDWVKEEAPDILCLQETK	P27695	N-Term(Dimethyl); K6(Dimethyl); C14(Carbamidomethyl); K19(Dimethyl)	2328.21	0.812691	1.11919	0.730547	0	1
AGLPCQDLEFVQFHPTGIYGAGCLITEGCR	P31040	N-Term(Dimethyl); C5(Carbamidomethyl); C23(Carbamidomethyl); C29(Carbamidomethyl)	3394.59	1.29859	0.937328	1.39383	0	0
QVQSLTCEVDALKGTNESLER	P08670	N-Term(Dimethyl); C7(Carbamidomethyl); K13(Dimethyl)	2433.23	0.95015	0.914586	1.07854	0	1
NIILEEGKEILVGDVGQTVDDPYATFVK	G3V1A4	N-Term(Dimethyl); K8(Dimethyl); K28(Dimethyl)	3146.69				0	1
TFSHELSDFGLESTAGEIPVVAIR	P30101	N-Term(Dimethyl)	2603.33	1.38571	1.43569	0.97105	0	0
LELVHHGPMAVAFEVYDDFLHYK	P53634	N-Term(Dimethyl); K23(Dimethyl)	2786.4	2.0612	3.1601	0.656214	0	0
LVDPLGEMLAPSWEEHATCLANAEEQDMQR	O95394	N-Term(Dimethyl); C19(Carbamidomethyl)	3468.58				0	0
ALLDSLQLGPDSLTVHLIHEVTK	Q14697	N-Term(Dimethyl); K23(Dimethyl)	2555.43	0.988158	0.996077	0.898492	0	0
DPDAGIDEAQVEQDAQALFQAGELK	P08758	N-Term(Dimethyl); K25(Dimethyl)	2714.3	1.10431	1.26818	0.819894	0	0
LCYVALDFEQEMATAASSSSLEK	P60709;I3L4N8	N-Term(Dimethyl); C2(Carbamidomethyl); K23(Dimethyl)	2606.23				0	0
SGPFGQIFRPDNFVFGQSGAGNNWAK	Q9BVA1;Q13885;P07437;P68371;P04350	N-Term(Dimethyl); K26(Dimethyl)	2854.4				0	0
FAHTNVESLVNEYDDNGEGIILFRPSHLTNK	P30101	N-Term(Dimethyl); K31(Dimethyl)	3585.79	0.978445	1.6159	0.609184	0	0
NATNVEQAFMTMAAEIKK	Q9H0U4	N-Term(Dimethyl); K17(Dimethyl); K18(Dimethyl)	2081.07	0.80546	1.01194	0.800787	0	1
LAASGEGGLQELSGHFENQK	Q16643	N-Term(Dimethyl); K20(Dimethyl)	2128.06	0.756011	0.734059	1.03615	0	0
AVCVLKGDGPVQGIINFEQK	P00441	N-Term(Dimethyl); C3(Carbamidomethyl); K6(Dimethyl); K20(Dimethyl)	2256.24	1.18647	1.74931	0.682368	0	1
RPQYSNPPVQGEVMEGADNQGAGEQGRPVR	P67809	N-Term(Dimethyl); Q10(Deamidated)	3252.55	1.02477	0.856134	1.20423	0	0
VFIYHGSSLGVVAKPSQVLEGEAVGIK	J3KNV4	N-Term(Dimethyl); K14(Dimethyl); K27(Dimethyl)	2868.63	0.650221			0	0
GDNVYEFHLEFLDLVKPEPVYK	Q9P035	N-Term(Dimethyl); K16(Dimethyl); K22(Dimethyl)	2735.42	1.35774	1.48017	0.922851	0	0
EVDPLVYNMSHEDPGNVSYSEIGGLSEQIR	P62333	N-Term(Dimethyl)	3362.58	1.24646	1.06787	1.17432	0	0
TPAGNFVTLEEGKGDLEEYGQDLLHTVFK	P43490	N-Term(Dimethyl); K13(Dimethyl); K29(Dimethyl)	3291.67	1.23021	1.74904	0.707635	0	1
FDPTQFQDCIIQGLTETGTDLEAVAK	Q7L1Q6	N-Term(Dimethyl); C9(Carbamidomethyl); K26(Dimethyl)	2953.45	1.021	0.926585	1.10858	0	0
QLQEQHYQQYMQQLYQVQLAQQQAALQK	Q9H3P7	N-Term(Dimethyl); K28(Dimethyl)	3518.78				0	0
GVAALTSDPAVQAIVLDTASDVLDK	Q9Y490	N-Term(Dimethyl); K25(Dimethyl)	2525.37	0.926274	1.05477	0.883505	0	0
VATPVDWKDGDSVMVLPTIPEEEAK	P30041	N-Term(Dimethyl); K8(Dimethyl); K25(Dimethyl)	2810.45	0.866101	1.02146	0.824751	0	1
EVLAGRPLFPHVLCHNCAVEFNFGQK	Q00839	N-Term(Dimethyl); C14(Carbamidomethyl); C17(Carbamidomethyl); K26(Dimethyl)	3095.57	1.03266	1.05601	0.98383	0	0
YTEHSTVGLAQQWDQLDQLGMR	Q13813	N-Term(Dimethyl)	2604.24	1.15808	1.02625	1.13531	0	0
ADHQPLTEASYVNLPTIALCNTDSPLR	C9J9K3	N-Term(Dimethyl); C20(Carbamidomethyl)	3024.5				0	0
TGQATVASGIPAGWMGLDCGPESSKK	P00558	N-Term(Dimethyl); C19(Carbamidomethyl); K25(Dimethyl); K26(Dimethyl)	2689.33				0	1
ICDPGLTAFEPEALGNLVEGMDFHR	D6R938;E9PBG7	N-Term(Dimethyl); C2(Carbamidomethyl)	2816.33				0	0
EVIITPNSAWGGEGSLGCGIGYGYLHR	Q9H8Y8	N-Term(Dimethyl); C18(Carbamidomethyl)	2891.41	1.34949	1.32495	1.02471	0	0
TDNAEWSIQGMTALPPDIERPYK	Q6UVY6	N-Term(Dimethyl); K23(Dimethyl)	2688.33				0	0
SLCEQVSHHPPAAAHHAESK	P22059	N-Term(Dimethyl); C3(Carbamidomethyl); K20(Dimethyl)	2249.08	1.02838	0.794546	1.30215	0	0
ANQAIQMACQSLGEPGCTQAQVLSAATIVAK	Q9Y490	N-Term(Dimethyl); C9(Carbamidomethyl); C17(Carbamidomethyl); K31(Dimethyl)	3272.63	0.91938	1.22576	0.7546	0	0
MGYAEEAPYDAIHVGAAAPVVPQALIDQLKPGGR	P22061	N-Term(Dimethyl); K30(Dimethyl)	3560.84	0.892091	0.953968	0.940812	0	0
VIHDNFGIVEGLMTTVHAITATQK	P04406	N-Term(Dimethyl); M13(Oxidation); K24(Dimethyl)	2667.4				0	0
VATTAGLYGSNLMEHTEIDHWLEFSATK	P07814	N-Term(Dimethyl); K28(Dimethyl)	3177.55	1.14971	1.14827	1.00734	0	0
GGPGSAVSPYPTFNPSSDVAALHK	P04083	N-Term(Dimethyl); K24(Dimethyl)	2412.21	0.957177	1.05776	0.903727	0	0
LMSSNSTDLPLNIECFMNDKDVSGK	Q92598	N-Term(Dimethyl); C15(Carbamidomethyl); K20(Dimethyl); K25(Dimethyl)	2899.38				0	1
GQDMETEAHQNKLEEMINELAVAMTAVK	Q15363	N-Term(Dimethyl); K12(Dimethyl); K28(Dimethyl)	3214.57	1.16281	1.21399	0.963653	0	1
SICTTVLELLDKYLIANATNPESK	P27348	N-Term(Dimethyl); C3(Carbamidomethyl); K12(Dimethyl); K24(Dimethyl)	2777.49				0	1
TLGKDHPAVAATLNNLAVLYGK	Q9H0B6;G3V2E7	N-Term(Dimethyl); K4(Dimethyl); K22(Dimethyl)	2350.35				0	1
FSQMLHPIFEEASDVIKEEFPNENQVVFAR	Q9BS26	N-Term(Dimethyl); K17(Dimethyl)	3606.78				0	1
FVIHCNSPVWGADKCEELLEK	O75367	N-Term(Dimethyl); C5(Carbamidomethyl); K14(Dimethyl); C15(Carbamidomethyl); K21(Dimethyl)	2615.3	1.24828	1.37009	0.916628	0	1
WSGPLSLQEVDEQPQHPLHVTYAGAAVDELGK	P30086	N-Term(Dimethyl); K32(Dimethyl)	3527.77				0	0
MFLGDNAHLSIINEYLSQSYQK	P46940	N-Term(Dimethyl); K22(Dimethyl)	2627.3	1.01752	1.13238	0.904022	0	0
FWEVISDEHGIDPTGTYHGDSDLQLDR	P07437	N-Term(Dimethyl)	3130.43	1.74794	2.02722	0.867468	0	0
TNHIGHTGYLNTVTVSPDGSLCASGGK	P63244	N-Term(Dimethyl); C22(Carbamidomethyl); K27(Dimethyl)	2799.37				0	0
NVASVCLQIGYPTVASVPHSIINGYK	P05388	N-Term(Dimethyl); C6(Carbamidomethyl); N23(Deamidated); K26(Dimethyl)	2844.49	1.04813	0.973315	1.0834	0	0
GDTSMLKPTLMAAVPEIMDR	O95573	N-Term(Dimethyl); K7(Dimethyl)	2232.13	0.980586	1.07218	0.920121	0	0
IYPHGLVLLDLQSYDGDAQGKEEIDSILNKVEER	P52788	N-Term(Dimethyl); K21(Dimethyl); K30(Dimethyl)	3941.04	1.23958	1.79889	0.69326	0	2
SLDLFNCEVTNLNDYRENVFK	H0YN26	N-Term(Dimethyl); C7(Carbamidomethyl); K21(Dimethyl)	2646.28	1.14902	1.07976	1.0706	0	1
NVAADIAVQLCESVANKLEGK	P08240	N-Term(Dimethyl); C11(Carbamidomethyl); K17(Dimethyl); K21(Dimethyl)	2313.24				0	1
QKSDAEEDGGTVSQEEEDRKPK	P27824	N-Term(Dimethyl); K2(Dimethyl); K20(Dimethyl); K22(Dimethyl)	2574.23	1.03854	0.882074	1.20675	0	2
TSPKPAVVETVTTAKPQQIQALMDEVTK	P56192	N-Term(Dimethyl); K4(Dimethyl); K15(Dimethyl); K28(Dimethyl)	3122.74	0.443005	0.531811	0.838066	0	0
TVGVNNPVFLLDEVDKLGK	Q86WA8	N-Term(Dimethyl); K16(Dimethyl); K19(Dimethyl)	2141.22	0.929794	0.750514	1.2464	0	1
SADESGQALLAAGHYASDEVR	Q13813	N-Term(Dimethyl)	2175.02				0	0
ILLSQTTGVAIPLHASSLDDVSLASTPK	P12270	N-Term(Dimethyl); K28(Dimethyl)	2890.61	1.0055	1.00173	1.00986	0	0
GDLENAFLNLVQCIQNKPLYFADR	P07355	N-Term(Dimethyl); C13(Carbamidomethyl); K17(Dimethyl)	2894.47	0.716606	0.585583	1.23118	0	0
EKLCYVALDFEQEMATAASSSSLEK	P60709;I3L4N8	N-Term(Dimethyl); K2(Dimethyl); C4(Carbamidomethyl); K25(Dimethyl)	2891.41				0	1
SINPDEAVAYGAAVQAAILSGDK	P11142	N-Term(Dimethyl); K23(Dimethyl)	2316.2				0	0
IIAEGANGPTTPEADKIFLER	P00367	N-Term(Dimethyl); K16(Dimethyl)	2298.23	0.848972	0.809096	1.05565	0	1
VAGTGEGGLEEMVEELNSGK	Q9UJU6;B4DDD6	N-Term(Dimethyl); K20(Dimethyl)	2061.99				0	0
YTNLSYIGEGAYGMVCSAYDNVNK	P28482	N-Term(Dimethyl); C16(Carbamidomethyl); K24(Dimethyl)	2745.25				0	0
SINTEVVACSVDSQFTHLAWINTPR	Q13162	N-Term(Dimethyl); C9(Carbamidomethyl)	2873.41				0	0
QTIGNSCGTIGLIHAVANNQDK	P09936	N-Term(Dimethyl); C7(Carbamidomethyl); K22(Dimethyl)	2367.21			0.851768	0	0
NMGGPYGGGNYGPGGSGGSGGYGGR	P22626	N-Term(Dimethyl)	2217.93				0	0
QRVEAAVGEDLFQEAHEVILK	P30711	N-Term(Dimethyl); K21(Dimethyl)	2437.3				0	1
AIEDEGGNPDEIEITSEGNKK	Q15424	N-Term(Dimethyl); K20(Dimethyl); K21(Dimethyl)	2329.14	0.994389	0.894796	1.11805	0	1
GVDEATIIDILTKR	P04083	N-Term(Dimethyl); K13(Dimethyl)	1599.93	0.952627	1.0836	0.886998	0	1
VCLIQGTVEALNAVHGFIAEK	P51513	N-Term(Dimethyl); C2(Carbamidomethyl); K21(Dimethyl)	2325.26				0	0
TISAVGEQLLPTVEHLQLELDQLK	E9PHI4	N-Term(Dimethyl); K24(Dimethyl)	2730.52				0	0
FTASAGIQVVGDDLTVTNPK	P06733	N-Term(Dimethyl); K20(Dimethyl)	2089.11	1.12328	1.5188	0.743386	0	0
AGTFQAFEQFGQQLLAHGHYASPEIK	Q13813	N-Term(Dimethyl); K26(Dimethyl)	2931.47	1.17509	1.26754	0.932692	0	0
AIVDCGFEHPSEVQHECIPQAILGMDVLCQAK	O00148;Q13838	N-Term(Dimethyl); C5(Carbamidomethyl); C17(Carbamidomethyl); C29(Carbamidomethyl); K32(Dimethyl)	3707.76				0	0
EILTLLQGVHQGAGFQDIPK	H7C1D4	N-Term(Dimethyl); K20(Dimethyl)	2220.23	1.19926	1.30827	0.922235	0	0
NFEHLIPDAPELIHDFLVNEK	P53618	N-Term(Dimethyl); K21(Dimethyl)	2546.32				0	0
IIVENLFYPVTLDVLHQIFSK	A6NLN1	N-Term(Dimethyl); K21(Dimethyl)	2544.44	1.10533	1.3561	0.820023	0	0
ELLTEFGYKGEETPVIVGSALCALEGR	P49411	N-Term(Dimethyl); K9(Dimethyl); C22(Carbamidomethyl)	2994.55	1.39436			0	1
LLEMNLMHAPQVADAILGNQMFTHYDR	Q00610	N-Term(Dimethyl)	3156.54				0	0
NLNTLCWAIGSISGAMHEEDEKR	O14980	N-Term(Dimethyl); C6(Carbamidomethyl); K22(Dimethyl)	2687.28	0.905814	1.03641	0.879298	0	1
EMEENFAVEAANYQDTIGR	P08670	N-Term(Dimethyl)	2214.99	1.0658	0.90652	1.20497	0	0
SGGGGDIHQGFQSLLTEVNK	P35237	N-Term(Dimethyl); K20(Dimethyl)	2100.06	1.38798	1.88936	0.73909	0	0
RLGSLLPVLSPTSLPSPLPATLETPVPAFLK	P48681	N-Term(Dimethyl); K31(Dimethyl)	3267.92	0.768362	0.550051	1.40537	0	1
AITVFSPDGHLFQVEYAQEAVK	O14818	N-Term(Dimethyl); K22(Dimethyl)	2505.3				0	0
LAELEEFINGPNNAHIQQVGDR	Q00610	N-Term(Dimethyl); N9(Deamidated)	2493.23				0	0
LLYMHMLGYPAHFGQLECLK	O43747	N-Term(Dimethyl); C18(Carbamidomethyl); K20(Dimethyl)	2477.25				0	0
AALSSQQQQQLALLLQQFQTLK	Q6Y7W6	N-Term(Dimethyl); K22(Dimethyl)	2541.43				0	0
GINSSNVENQLQATQAAR	P52292	N-Term(Dimethyl)	1928.97	0.588414	0.476432	1.24254	0	0
LTKEEILENWNMFVGSQATNYGEDLTK	Q15293	N-Term(Dimethyl); K3(Dimethyl); K27(Dimethyl)	3214.59				0	1
TVYGGGCSEMLMAHAVTQLANR	P78371	N-Term(Dimethyl); C7(Carbamidomethyl)	2394.13	1.0789	0.969097	1.12007	0	0
AGESVLVHGASGGVGLAACQIAR	Q08257	N-Term(Dimethyl); C19(Carbamidomethyl)	2208.14	1.15023	1.22754	0.942703	0	0
METTHSFGNPSISVSTQQPPKK	Q93052	N-Term(Dimethyl); K21(Dimethyl); K22(Dimethyl)	2485.27	0.854844	0.862444	0.997202	0	1
YSVLQQHAEANGVDGVDALDTASHTNK	Q99523	N-Term(Dimethyl); K27(Dimethyl)	2896.4	1.12962	1.60589	0.707692	0	0
SQIVMLEASAENILQQDFCHAIK	Q8TCS8	N-Term(Dimethyl); C19(Carbamidomethyl); K23(Dimethyl)	2701.37				0	0
TVEEVLGHFGVNESTGLSLEQVKK	P16615	N-Term(Dimethyl); K23(Dimethyl); K24(Dimethyl)	2684.45	0.847063	1.01805	0.837091	0	1
LGRPTLSSEVGIIICDIANPASLDEMAK	Q8NBX0	N-Term(Dimethyl); C15(Carbamidomethyl); K28(Dimethyl)	3026.59				0	0
CIAVHPTQPFILTSSDDMLIK	P35606	N-Term(Dimethyl); C1(Carbamidomethyl); K21(Dimethyl)	2442.27				0	0
TWPDHGVPSDPGGVLDFLEEVHHK	Q06124	N-Term(Dimethyl); K24(Dimethyl)	2724.33	0.836164	0.850256	0.989394	0	0
SKDDQVTVIGAGVTLHEALAAAELLK	P29401	N-Term(Dimethyl); K2(Dimethyl); K26(Dimethyl)	2733.53	1.19933	1.23377	0.88911	0	1
AAVEALQSQALHATSQQPLRK	A0A087X142	N-Term(Dimethyl); K21(Dimethyl)	2303.28	0.999326	1.27271	0.789961	0	1
GDGAELIWDKDDPSAMDFVTSAANLR	Q9UBT2	N-Term(Dimethyl); K10(Dimethyl)	2850.35	1.32452	1.21222	1.09927	0	1
VVSSLQQEIWEEEDLNRK	P48681	N-Term(Dimethyl); K18(Dimethyl)	2258.16	0.630359	0.455519	1.39222	0	1
LADVDKDGLLDDEEFALANHLIK	Q9H4M9	N-Term(Dimethyl); K6(Dimethyl); K23(Dimethyl)	2638.39	1.01049	0.969552	1.04855	0	1
FFEEVNDPAKNDALEMVEETTWQGLK	P49748	N-Term(Dimethyl); K10(Dimethyl); K26(Dimethyl)	3124.5	1.02713	1.05322	0.981143	0	1
MVLAAAGGVEHQQLLDLAQK	P31930	N-Term(Dimethyl); K20(Dimethyl)	2148.18				0	0
HTGPGILSMANAGPNTNGSQFFICTAK	P62937	N-Term(Dimethyl); N11(Deamidated); N15(Deamidated); C24(Carbamidomethyl); K27(Dimethyl)	2849.36	1.20306	1.20758	1.00231	0	0
GVMTTGSDIGFSVIQAHDVQNPLHFGEMK	Q8TEM1	N-Term(Dimethyl); K29(Dimethyl)	3171.56				0	0
ELGLNPEKVNIEGGAIALGHPLGASGCR	Q9BWD1	N-Term(Dimethyl); K8(Dimethyl); C27(Carbamidomethyl)	2885.53	0.726992			0	1
LLASSDPLAQIAEDKPYAELWMGTHPR	P34949	N-Term(Dimethyl); K15(Dimethyl)	3065.57				0	0
FAHTNVESLVNEYDDNGEGIILFRPSHLTNKFEDK	P30101	N-Term(Dimethyl); N11(Deamidated); K31(Dimethyl); K35(Dimethyl)	4134.04				0	1
VALIGSPVDLTYTYDHLGDSPK	P28331	N-Term(Dimethyl); K22(Dimethyl)	2417.25	0.901577	0.806705	1.01143	0	0
TCEEHQLCVVAVLPHILDTGAAGR	Q15084	N-Term(Dimethyl); C2(Carbamidomethyl); C8(Carbamidomethyl)	2674.34				0	0
RNDFQLIGIQDGYLSLLQDSGEVR	I3L397	N-Term(Dimethyl)	2764.42	1.23179	1.2233	1.01305	0	1
GILSGTSDLLLTFDEAEVRK	P18206	N-Term(Dimethyl); K20(Dimethyl)	2220.21	0.872277	0.805377	1.08964	0	1
VVMITGDNPLTACHVAQELHFIEK	Q9HD20	N-Term(Dimethyl); C13(Carbamidomethyl); K24(Dimethyl)	2778.42	1.04347	0.992746	1.05748	0	0
LLPCLHSACSACLGPAAPAAANSSGDGGAAGDGTVVDCPVCK	Q13263	N-Term(Dimethyl); C4(Carbamidomethyl); C9(Carbamidomethyl); C12(Carbamidomethyl); C38(Carbamidomethyl); C41(Carbamidomethyl); K42(Dimethyl)	4167.9	1.14208	1.05636	1.0877	0	0
LGGSLADSYLDEGFLLDKK	P78371	N-Term(Dimethyl); K18(Dimethyl); K19(Dimethyl)	2125.14				0	1
DKLESEMEDAYHEHQANLLR	P23246	N-Term(Dimethyl); K2(Dimethyl)	2484.18	0.957352	1.03448	0.931061	0	1
AKCELSSSVQTDINLPYLTMDSSGPK	P38646	N-Term(Dimethyl); K2(Dimethyl); C3(Carbamidomethyl); K26(Dimethyl)	2925.45	0.767477			0	1
SGPFGQIFRPDNFVFGQSGAGNNWAK	Q9BVA1;Q13885;P07437;P68371;P04350	N-Term(Dimethyl); N22(Deamidated); K26(Dimethyl)	2855.38				0	0
VDTVNHLADELINSGHSDAATIAEWK	Q01082	N-Term(Dimethyl); N13(Deamidated); K26(Dimethyl)	2863.42				0	0
SSPSFSSLHYQDAGNYVCETALQEVEGLK	Q13740	N-Term(Dimethyl); C18(Carbamidomethyl); K29(Dimethyl)	3272.53				0	0
LNSVQSSERPLFLVHPIEGSTTVFHSLASR	P49327	N-Term(Dimethyl)	3336.76				0	0
QPYAVSELAGHQTSAESWGTGR	P36578	N-Term(Dimethyl)	2360.12	0.970305	0.695745	1.40309	0	0
AQLNIGNVLPVGTMPEGTIVCCLEEKPGDR	P62917	N-Term(Dimethyl); C21(Carbamidomethyl); C22(Carbamidomethyl); K26(Dimethyl)	3323.67	1.03529	0.924209	1.12699	0	0
QVLGQMVIDEELLGDGHSYSPR	P28070	N-Term(Dimethyl)	2471.22				0	0
ELASQPDVDGFLVGGASLKPEFVDIINAK	P60174	N-Term(Dimethyl); K19(Dimethyl); K29(Dimethyl)	3113.68	0.785175	0.973989	0.811036	0	0
GKDEAMAIGGHWSPSLDGPDPEKDPSVLIK	Q8IX12	N-Term(Dimethyl); K2(Dimethyl); K23(Dimethyl); K30(Dimethyl)	3258.66	0.908507	0.815663	1.12059	0	2
AYHEQLSVAEITNACFEPANQMVK	P68363	N-Term(Dimethyl); N13(Deamidated); C15(Carbamidomethyl); K24(Dimethyl)	2807.33	1.19002	1.12335	1.06577	0	0
HLSDHLSELVEQTLSDLEQSK	O75643	N-Term(Dimethyl); K21(Dimethyl)	2464.25	0.93049	0.917154	1.0207	0	0
MVMPSWFDLMGLSPDAPEDEAGIKK	O95372	N-Term(Dimethyl); K24(Dimethyl); K25(Dimethyl)	2848.39				0	1
FVSAIEGMHPNQEDHETFVDINPLTGIILK	Q14108	N-Term(Dimethyl); K30(Dimethyl)	3420.74				0	0
LNCQVIGASVDSHFCHLAWVNTPK	Q06830	N-Term(Dimethyl); C3(Carbamidomethyl); C15(Carbamidomethyl); K24(Dimethyl)	2809.38	1.06604	1.43861	0.74552	0	0
TIGGGDDSFNTFFSETGAGK	P68363;Q9BQE3;F8VQQ4	N-Term(Dimethyl); K20(Dimethyl)	2063.95				0	0
LGLAPQIQDLYGKVDFTEEEINNMKTELEK	P46940	N-Term(Dimethyl); K13(Dimethyl); K25(Dimethyl); K30(Dimethyl)	3577.87				0	2
SSSADFGTFNTSQSHQTASAVSK	P52594	N-Term(Dimethyl); K23(Dimethyl)	2401.12	1.15904	1.27625	0.913674	0	0
DVNLRPEQLGDICVGNVLQPGAGAIMAR	P09110	N-Term(Dimethyl); C13(Carbamidomethyl)	2991.54	1.37449	1.31267	1.05345	0	0
LKTDNAGDQHGGGGGGGGGAGAAGGGGGGENYDDPHKTPASPVVHIR	P14866	N-Term(Dimethyl); K2(Dimethyl); K37(Dimethyl)	4364.06	1.06777	1.07468	1.02265	0	2
HLNYTEFTQFLQELQLEHAR	O75746	N-Term(Dimethyl)	2545.27	1.3405	1.26646	1.06489	0	0
LGGSPTSLGTWGSWIGPDHDKFSAMK	K7ELL7	N-Term(Dimethyl); K21(Dimethyl); K26(Dimethyl)	2816.4	0.765901	1.36397	0.56493	0	1
GDFFPPERPQQLPHGLGGIGMGLGPGGQPIDANHLNK	P52272;M0R019	N-Term(Dimethyl); K37(Dimethyl)	3874.96				0	0
QESIMDAGPVVVHCSAGIGR	Q06124	N-Term(Dimethyl); C14(Carbamidomethyl)	2111.03	1.21893	1.00208	1.22378	0	0
YASICQQNGIVPIVEPEILPDGDHDLKR	P04075	N-Term(Dimethyl); C5(Carbamidomethyl); K27(Dimethyl)	3232.66	0.540108	0.870815	0.826926	0	1
FLSQPFQVAEVFTGHMGK	P06576	N-Term(Dimethyl); K18(Dimethyl)	2079.06	0.916336	0.882794	1.04429	0	0
DKPELQFPFLQDEDTVATLLECK	P09543	N-Term(Dimethyl); K2(Dimethyl); C22(Carbamidomethyl); K23(Dimethyl)	2820.43	1.11841	1.16963	0.96201	0	0
YAPTEAQLNAVDALIDSMSLAK	P13010	N-Term(Dimethyl); K22(Dimethyl)	2377.22	0.984172	0.839647	1.17924	0	0
ETIELVHTEPTDVAQLPSR	Q6IBS0	N-Term(Dimethyl)	2163.12	1.03979	0.946646	1.10506	0	0
TAFDEAIAELDTLSEESYK	P63104	N-Term(Dimethyl); K19(Dimethyl)	2188.05	0.973444	0.999313	0.980025	0	0
LFDHPESPTPNPTEPLFLAQAEVYK	P49327	N-Term(Dimethyl); K25(Dimethyl)	2896.47				0	0
TVLSANADHMAQIEGLMDDVDFK	A0A087X054	N-Term(Dimethyl); K23(Dimethyl)	2576.23				0	0
ETAAVIFLHGLGDTGHSWADALSTIR	O95372	N-Term(Dimethyl)	2766.42	1.10552	1.08573	1.02441	0	0
SGFEPASLKEEVGEEAIVELVENGKK	P35579	N-Term(Dimethyl); K9(Dimethyl); K25(Dimethyl); K26(Dimethyl)	2900.54	1.02362	0.929128	1.50905	0	2
TDPHLCDFLETHFLDEEVK	P02792	N-Term(Dimethyl); C6(Carbamidomethyl); K19(Dimethyl)	2401.13	1.16406	1.45266	0.806195	0	0
VEDMAELTCLNEASVLHNLK	P35579;P35580	N-Term(Dimethyl); C9(Carbamidomethyl); K20(Dimethyl)	2342.17				0	0
QTNNQNWGSQPIAQQPLQGGDHSGNYGYK	O60506	N-Term(Dimethyl); K29(Dimethyl)	3243.52				0	0
RCEAFGWHAIIVDGHSVEELCK	P29401	N-Term(Dimethyl); C2(Carbamidomethyl); C21(Carbamidomethyl); K22(Dimethyl)	2669.28	1.12301	1.30203	0.836112	0	1
LAQAHPAGPPTLDPVNDLQLK	Q15477	N-Term(Dimethyl); K21(Dimethyl)	2251.24	1.17085	1.0065	1.17034	0	0
TTGIVMDSGDGVTHTVPIYEGYALPHAILR	P60709;I3L4N8	N-Term(Dimethyl)	3211.64				0	0
AGLLHNILPSQSTDLHHSVGTELLSLVYK	P78527	N-Term(Dimethyl); K29(Dimethyl)	3198.74	0.856047	0.82884	1.03909	0	0
ALTGHLEEVVLALLK	P04083	N-Term(Dimethyl); K15(Dimethyl)	1662.01	0.962265	1.37254	0.705338	0	0
AKPYEGSILEADCDILIPAASEK	P00367	N-Term(Dimethyl); K2(Dimethyl); C13(Carbamidomethyl); K23(Dimethyl)	2574.33	0.741057			0	0
SGGNSYGSGGASYNPGSHGGYGGGSGGGSSYQGK	Q12906	N-Term(Dimethyl); K34(Dimethyl)	3068.29				0	0
RFPHGIPFLADYVHSLGLK	P17050	N-Term(Dimethyl); K19(Dimethyl)	2223.23	1.67537	2.02644	0.831773	0	1
RGVMLAVDAVIAELKK	P10809	N-Term(Dimethyl); K15(Dimethyl); K16(Dimethyl)	1797.1	0.780144	0.612156	1.28215	0	2
FDGALNVDLTEFQTNLVPYPR	P68363;Q9BQE3	N-Term(Dimethyl)	2437.23				0	0
TEDSGLQTQVIAAATQCALSTSQLVACTK	Q9Y490	N-Term(Dimethyl); C17(Carbamidomethyl); C27(Carbamidomethyl); K29(Dimethyl)	3108.55				0	0
TNVLYELAQYASEPSEQELLRK	P16435	N-Term(Dimethyl); K22(Dimethyl)	2637.38	1.44461	2.49876	0.581638	0	1
AAAVPVEFQEHHLSEVQNMASEEKLEQVLSSMK	O43837	N-Term(Dimethyl); K24(Dimethyl); K33(Dimethyl)	3779.88	0.822754	0.701372	1.18018	0	1
VILPNFLANGGDGFQMIKDELLR	P21589	N-Term(Dimethyl); K18(Dimethyl)	2616.41	2.45356	2.68802	0.918313	0	1
GVDDLDFFIGDEAIEKPTYATK	P61158	N-Term(Dimethyl); K16(Dimethyl); K22(Dimethyl)	2528.26				0	0
LVSNHSLHETSSVFVDSLTK	P21333	N-Term(Dimethyl); K20(Dimethyl)	2256.18				0	0
VAGHPNIVINNAAGNFISPTER	Q16698	N-Term(Dimethyl)	2319.22	0.981085	0.773174	1.27661	0	0
EDKVPGPLEIPSGMEDAGPGADIIGVNGQGPNLEGK	P48681	N-Term(Dimethyl); K3(Dimethyl); K36(Dimethyl)	3641.83	0.594142	0.417312	1.43238	0	1
EQQIVIQSSGGLSKDDIENMVK	P38646	N-Term(Dimethyl); K14(Dimethyl); K22(Dimethyl)	2502.31	0.939613	0.869123	1.08767	0	1
IAAAGLDVTSPEPLPTNHPLLTLK	Q9UBQ7	N-Term(Dimethyl); K24(Dimethyl)	2524.43	1.15452	1.10836	0.915917	0	0
QFDNYGEEFTMHDTIGCYLDIDKGHVK	A0A087X2G1	N-Term(Dimethyl); C17(Carbamidomethyl); K23(Dimethyl); K27(Dimethyl)	3316.52	1.57249	1.33011	0.883339	0	1
TDQVIQSLIALVNDPQPEHPLRADLAEEYSK	P68036	N-Term(Dimethyl); K31(Dimethyl)	3545.84	0.97362	1.10777	0.884237	0	1
SGGTEGLLAEKLEALITQTR	Q9UHB9	N-Term(Dimethyl); K11(Dimethyl)	2143.19				0	1
ERLEQQVPVNQVFGQDEMIDVIGVTK	P39023	N-Term(Dimethyl); K26(Dimethyl)	3027.58	0.938726	0.921117	1.0253	0	1
YFAGNLASGGAAGATSLCFVYPLDFAR	P12235;P12236	N-Term(Dimethyl); C18(Carbamidomethyl)	2824.36				0	0
FAHTNVESLVNEYDDNGEGIILFRPSHLTNKFEDK	P30101	N-Term(Dimethyl); K31(Dimethyl); K35(Dimethyl)	4133.06	1.6809	2.04856	0.825506	0	1
AYHEQLTVAEITNACFEPANQMVK	Q9BQE3	N-Term(Dimethyl); N13(Deamidated); C15(Carbamidomethyl); K24(Dimethyl)	2821.36				0	0
TVLELQYVLDKLGDDEVR	Q14444	N-Term(Dimethyl); K11(Dimethyl)	2161.17	0.890775	0.742532	1.20692	0	1
GGVSAVAGGVTAVGSAVVNKVPLTGK	Q8WUH6	N-Term(Dimethyl); K20(Dimethyl); K26(Dimethyl)	2379.4				0	1
AQEACGPLEMDSALSVVQNLEK	Q9Y490	N-Term(Dimethyl); C5(Carbamidomethyl); K22(Dimethyl)	2445.19	0.955038	1.0441	0.920251	0	0
DGNASGTTLLEALDCILPPTRPTDKPLR	P68104	N-Term(Dimethyl); C15(Carbamidomethyl); K25(Dimethyl)	3077.62	0.88442	0.885032	1.00537	0	0
SVNSLDGLASVLYPGCDTLDKVFTYAK	O95573	N-Term(Dimethyl); C16(Carbamidomethyl); K21(Dimethyl); K27(Dimethyl)	3017.55	0.872961	0.909201	0.965969	0	1
TVEELLETGLIQVATKEEELNAIR	Q86UP2	N-Term(Dimethyl); K16(Dimethyl)	2754.51	0.971657	1.02897	0.950028	0	1
FLSESLMWHISSQVAELKK	Q9Y2A7	N-Term(Dimethyl); K18(Dimethyl); K19(Dimethyl)	2317.25	1.13078	1.21868	0.933502	0	1
GFGDGYNGYGGGPGGGNFGGSPGYGGGR	P22626	N-Term(Dimethyl); N7(Deamidated)	2524.05	1.39715	1.32638	1.05975	0	0
ADQELMTYSHDNIICGITSVSFSK	P62873	N-Term(Dimethyl); C15(Carbamidomethyl); K24(Dimethyl)	2772.32	1.32225	1.33192	0.998769	0	0
YVLENHPGTNSNYQMHLLKK	Q5SSJ5	N-Term(Dimethyl); K19(Dimethyl); K20(Dimethyl)	2470.29	1.07476	1.24133	0.871066	0	1
INEGIGQGDLSELPELHALTAGLK	Q15067	N-Term(Dimethyl); K24(Dimethyl)	2531.36	0.722044	0.579384	1.25379	0	0
SASYKPVFVTEITDDLHFYVQDVETGTQLEK	Q7KZF4	N-Term(Dimethyl); K5(Dimethyl); K31(Dimethyl)	3643.83				0	0
LTLYDIAHTPGVAADLSHIETK	P40926	N-Term(Dimethyl); K22(Dimethyl)	2421.3	0.799672	0.769223	1.04589	0	0
LDINLLDNVVNCLYHGEGAQQR	O14980	N-Term(Dimethyl); C12(Carbamidomethyl)	2569.28	1.19329	1.10782	1.08369	0	0
NLAMEATYINHNFSQQCLR	O15371	N-Term(Dimethyl); C17(Carbamidomethyl)	2338.1				0	0
QLPDKWQHDLFDSGFGGGAGVETGGK	Q86V81	N-Term(Dimethyl); K5(Dimethyl); K26(Dimethyl)	2787.36	0.907588	0.86549	1.05501	0	1
FMQDPMEIFVDDETKLTLHGLQQYYVK	Q13838	N-Term(Dimethyl); K15(Dimethyl); K27(Dimethyl)	3372.68				0	1
IKWGDAGAEYVVESTGVFTTMEK	P04406	N-Term(Dimethyl); K2(Dimethyl); K23(Dimethyl)	2602.3	1.36452	1.47199	0.932617	0	1
ASQKPQPNFPSPEYMIFDHEFTK	O60763	N-Term(Dimethyl); K4(Dimethyl); K23(Dimethyl)	2822.39				0	0
RFGVPVIADGGIQNVGHIAK	P12268	N-Term(Dimethyl); K20(Dimethyl)	2104.2	0.775392	0.712195	1.09534	0	1
GFAFVTFDDHDTVDKIVVQK	P51991	N-Term(Dimethyl); K15(Dimethyl); K20(Dimethyl)	2365.24	1.02764	1.07045	0.985057	0	1
VDTVNHLADELINSGHSDAATIAEWK	Q01082	N-Term(Dimethyl); K26(Dimethyl)	2862.42	1.13077	1.42188	0.800088	0	0
ISVIVETVYTHVLHPYPTQITQSEK	P04843	N-Term(Dimethyl); K25(Dimethyl)	2938.58	1.07399	1.11746	0.96693	0	0
YAQDFGLVEEACFPYTGTDSPCK	P53634	N-Term(Dimethyl); C12(Carbamidomethyl); C22(Carbamidomethyl); K23(Dimethyl)	2711.19	1.33496	1.78065	0.75425	0	0
VELNALMTDETISNVPILILGNK	Q9NR31	N-Term(Dimethyl); K23(Dimethyl)	2553.42				0	0
HFVDSHHQKPVNAIIEHVR	Q7KZF4	N-Term(Dimethyl); K9(Dimethyl)	2319.24				0	0
FIQENIFGICPHMTEDNKDLIQGK	P30101	N-Term(Dimethyl); C10(Carbamidomethyl); K18(Dimethyl); K24(Dimethyl)	2931.47	1.06377	1.34226	0.797332	0	1
TLVLSNLSYSATEETLQEVFEK	P19338	N-Term(Dimethyl); K22(Dimethyl)	2557.32	0.955085	0.840089	1.14378	0	0
SNFLNCYVSGFHPSDIEVDLLK	P61769	N-Term(Dimethyl); C6(Carbamidomethyl); K22(Dimethyl)	2610.29				0	0
IMDATNILVSPLVYLYPDIPKEEAFGK	P40763	N-Term(Dimethyl); K21(Dimethyl); K27(Dimethyl)	3120.68				0	1
QAPQTIHLPSGEILDVFDAAER	P21399	N-Term(Dimethyl)	2435.25	0.594066	0.710174	0.841584	0	0
NVASVCLQIGYPTVASVPHSIINGYKR	P05388	N-Term(Dimethyl); C6(Carbamidomethyl); N23(Deamidated); K26(Dimethyl)	3000.58	0.531315	1.38641	0.385556	0	1
TGQATVASGIPAGWMGLDCGPESSK	P00558	N-Term(Dimethyl); C19(Carbamidomethyl); K25(Dimethyl)	2533.19	1.08281	1.4923	0.730003	0	0
GTDLWLGVDALGLNIYEKDDKLTPK	E7EQR4	N-Term(Dimethyl); K18(Dimethyl); K21(Dimethyl); K25(Dimethyl)	2886.57	1.16926	1.48225	0.793628	0	2
LALSQNQQSSGAAGPTGKNEEK	O95232	N-Term(Dimethyl); K18(Dimethyl); K22(Dimethyl)	2299.19	0.844799	0.882812	0.962748	0	1
CPSIAAAIAAVNALHGR	Q14498	N-Term(Dimethyl); C1(Carbamidomethyl)	1719.93	1.07809	0.972706	0.971163	0	0
VVGIHMQGLGCDEMLQGFAVAVK	P00390	N-Term(Dimethyl); C11(Carbamidomethyl); K23(Dimethyl)	2515.28				0	0
HCIMQANAEYHQSILAK	Q8WUM4	N-Term(Dimethyl); C2(Carbamidomethyl); K17(Dimethyl)	2070.03	1.11476	1.61522	0.69435	0	0
MVHNGIEYGDMQLICEAYHLMK	P52209	N-Term(Dimethyl); C15(Carbamidomethyl); K22(Dimethyl)	2708.26	0.840018	1.381	0.61196	0	0
CPEALFQPSFLGMESCGIHETTFNSIMK	P60709	N-Term(Dimethyl); C1(Carbamidomethyl); C16(Carbamidomethyl); N24(Deamidated); K28(Dimethyl)	3288.51	1.08471	1.17449	0.929169	0	0
ECVDGVLGGEDYNHNNINQWTASIVEQSLTHLVK	P51808	N-Term(Dimethyl); C2(Carbamidomethyl); K34(Dimethyl)	3895.89				0	0
TAVIDHHNYDISDLGQHTLIVADTENLLK	A0A0C4DGS1	N-Term(Dimethyl); K29(Dimethyl)	3301.69				0	0
TCFETFPDKVAIQLNDTHPALSIPELMR	P11216	N-Term(Dimethyl); C2(Carbamidomethyl); K9(Dimethyl)	3299.68				0	1
QAVSMFLGAVEEAKK	P49419	N-Term(Dimethyl); K14(Dimethyl); K15(Dimethyl)	1691.93				0	1
TIIGSFNGALAAVPVQDLGSTVIK	Q9BWD1	N-Term(Dimethyl); N7(Deamidated); K24(Dimethyl)	2428.37	0.748944	0.647436	1.1638	0	0
NMAEQIIQEIYSQIQSK	P29401	N-Term(Dimethyl); K17(Dimethyl)	2079.07	1.0271	1.19022	0.868189	0	0
HVIQTLSQEFALSQHPHSR	Q08AM6	N-Term(Dimethyl)	2243.17			1.0207	0	0
QNLSKEELIAELQDCEGLIVR	O43175	N-Term(Dimethyl); K5(Dimethyl); C15(Carbamidomethyl)	2513.32	0.758316	0.883256	0.863757	0	1
LGVNNISGIEEVNMFTNQGTVIHFNNPK	P20290	N-Term(Dimethyl); K28(Dimethyl)	3142.6	0.680755	0.67866	1.01849	0	0
AFGFSHLEALLDDSKELQR	Q96FW1	N-Term(Dimethyl); K15(Dimethyl)	2232.16	0.7102	0.848441	0.842145	0	1
QVGNVTKPTVIISQEGDKVVIR	O15540	N-Term(Dimethyl); K7(Dimethyl); K18(Dimethyl)	2464.44	0.528678	0.753902	1.5606	0	1
EEGPYEVEVTYDGVPVPGSPFPLEAVAPTKPSK	P21333	N-Term(Dimethyl); K30(Dimethyl); K33(Dimethyl)	3569.83	1.58133	0.786402	2.02305	0	0
FIIHAPPGEFNEVFNDVR	P47755	N-Term(Dimethyl)	2129.07	0.904738	0.905531	1.02042	0	0
LKPAFIKPYGTVTAANSSFLTDGASAMLIMAEEK	P55084	N-Term(Dimethyl); K2(Dimethyl); K7(Dimethyl); K34(Dimethyl)	3684.94	1.39841	1.34566	1.04551	0	0
VQQMIGQIDGLISQLEMDQQAGK	O95202	N-Term(Dimethyl); K23(Dimethyl)	2586.32	0.852189	0.718562	1.19316	0	0
GLGTDEDSLIEIICSR	P07355	N-Term(Dimethyl); C14(Carbamidomethyl)	1805.89	0.823558	0.600091	1.38072	0	0
TAEDYQALNKDIEAQLQHAGLR	O95479	N-Term(Dimethyl); K10(Dimethyl)	2540.3	1.34767	1.90809	0.710579	0	1
NWSAAGNAFCQAAQLHLQLQSK	P54920	N-Term(Dimethyl); C10(Carbamidomethyl); K22(Dimethyl)	2499.24				0	0
FFVDGQWTHDPSEPIVTSQLGTVNNIIQVK	Q9Y478	N-Term(Dimethyl); K30(Dimethyl)	3425.75	1.01886	1.32077	0.776091	0	0
AVSSAIAQLLGEVAQGNENYAGIAAR	Q9Y490	N-Term(Dimethyl)	2601.36	1.13034	1.06317	1.06962	0	0
SGAFGHLFRPDNFIFGQSGAGNNWAK	Q13509	N-Term(Dimethyl); K26(Dimethyl)	2851.39				0	0
TSQENISFETMYDVLSTKPVLNK	E7EMM4	N-Term(Dimethyl); K18(Dimethyl); K23(Dimethyl)	2728.41	1.03364	1.38308	0.751887	0	0
HIADLAGNSEVILPVPAFNVINGGSHAGNK	P06733	N-Term(Dimethyl); K30(Dimethyl)	3067.64	0.248346	0.539187	0.463388	0	0
VEQIAAIAQELNELDYYDSHNVNTR	O43707	N-Term(Dimethyl); Q9(Deamidated)	2934.43				0	0
NNLSFIETSALDSTNVEEAFK	Q15907	N-Term(Dimethyl); K21(Dimethyl)	2385.18	1.48182	1.88425	0.791194	0	0
NTNDANSCQIIIPQNQVNR	P50395;P31150	N-Term(Dimethyl); C8(Carbamidomethyl)	2227.08				0	0
TTIDLTEDENQYSIGNLKPDTEYEVSLISR	P24821;J3QSU6	N-Term(Dimethyl); K18(Dimethyl)	3499.72				0	0
SPVYLDLAYLPSGSSAHLVDEEFFQR	Q66K74	N-Term(Dimethyl)	2968.47	1.17581	1.16654	1.01407	0	0
ELGGESNFGDALLDAGESMK	Q99961	N-Term(Dimethyl); K20(Dimethyl)	2095.97	0.976908	0.804207	1.22212	0	0
IVQTYHVNMAGTNPYTTITPQEINGK	P12814	N-Term(Dimethyl); N24(Deamidated); K26(Dimethyl)	2947.47	0.694913	0.703632	0.993602	0	0
LTTPTYGDLNHLVSATMSGVTTCLR	Q9BVA1;Q13885;P07437;P68371;P04350	N-Term(Dimethyl); C23(Carbamidomethyl)	2736.37				0	0
ALQLAQRPVSLLASPWTSPTWLK	P04062	N-Term(Dimethyl); K23(Dimethyl)	2619.5	2.04907	2.13115	0.967316	0	0
MAAISESNINLCGSHCGVSIGEDGPSQMALEDLAMFR	P29401	N-Term(Dimethyl); C12(Carbamidomethyl); C16(Carbamidomethyl)	3995.8				0	0
LKVEGYSGTAGDSMAYHNGR	P24821;J3QSU6	N-Term(Dimethyl); K2(Dimethyl)	2169.03				0	1
YQLLQLVEPFGVISNHLILNK	P43243	N-Term(Dimethyl); K21(Dimethyl)	2494.43				0	0
IVSGEAESVEVTPENLQDFVGKPVFTVER	K7EJE8	N-Term(Dimethyl); K22(Dimethyl)	3231.67				0	0
YGDSEFTVQSTTGHCVHMR	P52597	N-Term(Dimethyl); C15(Carbamidomethyl)	2239.98	1.06826	1.05676	1.07555	0	0
SINPLGGFVHYGEVTNDFVMLK	P39023	N-Term(Dimethyl); K22(Dimethyl)	2493.27	1.09242	1.0091	1.08913	0	0
GVNAIVYMIDAADREK	Q9NVJ2	N-Term(Dimethyl); K16(Dimethyl)	1820.95	1.03892			0	1
STLMNTLFNTTFETEEASHHEACVR	A0A087X142	N-Term(Dimethyl); C23(Carbamidomethyl)	2953.34	1.27425	1.1941	1.0736	0	0
VVSIGVPVSELLDDPSGPAGSLTSVEFCGGTHLR	P49588	N-Term(Dimethyl); C28(Carbamidomethyl)	3480.75	1.20065	1.08718	1.11107	0	0
LGAASLGAEDPETQVVLINAVK	Q9Y490	N-Term(Dimethyl); K22(Dimethyl)	2251.25	1.04766	1.05058	0.949758	0	0
SLYQSAGVAPESFEYIEAHGTGTK	P49327	N-Term(Dimethyl); K24(Dimethyl)	2598.26	0.768949	0.593753	1.30292	0	0
ECPSDECGAGVFMASHFDR	P62979	N-Term(Dimethyl); C2(Carbamidomethyl); C7(Carbamidomethyl)	2199.88				0	0
LFPNSLDQTDMHGDSEYNIMFGPDICGPGTK	P27797	N-Term(Dimethyl); C26(Carbamidomethyl); K31(Dimethyl)	3512.58	1.31877	1.43592	0.896362	0	0
VAEEHAPSIVFIDEIDAIGTK	P62191	N-Term(Dimethyl); K21(Dimethyl)	2310.22	0.959528	1.1246	0.858392	0	0
AALAHSEEVTASQVAATK	Q15149	N-Term(Dimethyl); K18(Dimethyl)	1839.98	0.928083	0.912593	1.02315	0	0
HLAILGAGLMGAGIAQVSVDK	P40939	N-Term(Dimethyl); K21(Dimethyl)	2077.18				0	0
GPHLVQSDGTVPFWAHAGNAIPSSDQIR	P49257	N-Term(Dimethyl)	2985.48				0	0
RPAEDMEEEQAFKR	P61978;Q5T6W2	N-Term(Dimethyl); K13(Dimethyl)	1791.86				0	1
FGGEHVPNSPFQVTALAGDQPSVQPPLR	P21333	N-Term(Dimethyl)	2973.51	0.608136	0.305618	3.23189	0	0
TQYEAMASSNMHEAEEWYR	P14136	N-Term(Dimethyl)	2360.99	0.683842	0.606508	0.98213	0	0
AASAGQEPLHNEELAGAGR	Q96HY6	N-Term(Dimethyl)	1905.93				0	0
YGINTTDIFQTVDLWEGK	P37802	N-Term(Dimethyl); K18(Dimethyl)	2156.08				0	0
EKPYFPIPEEYTFIQNVPLEDR	Q00839	N-Term(Dimethyl); K2(Dimethyl)	2780.41	0.912085	1.0344	0.887099	0	0
QTTSNLGHLNKPSIQALIHGLNR	O00487	N-Term(Dimethyl); K11(Dimethyl)	2568.43	0.846053	0.930162	0.915095	0	0
EDEEESLNEVGYDDIGGCRK	P55072	N-Term(Dimethyl); C18(Carbamidomethyl); K20(Dimethyl)	2370.03				0	1
GSNTCELIFEDCKIPAANILGHENK	P26440	N-Term(Dimethyl); C5(Carbamidomethyl); C12(Carbamidomethyl); K13(Dimethyl); K25(Dimethyl)	2914.44	1.06897	0.939559	1.14464	0	1
QVEHPLLSGLLYPGLQALDEEYLK	P54577	N-Term(Dimethyl); K24(Dimethyl)	2781.5	0.912862	1.14082	0.805034	0	0
IIMTSSASGIYGNFGQANYSAAK	P51659	N-Term(Dimethyl); K23(Dimethyl)	2407.19	1.30203	1.5866	0.825624	0	0
MVGGIAQIIAAQEEMLRK	Q9Y490	N-Term(Dimethyl); K18(Dimethyl)	2014.11				0	1
MGEDMHTIGFGIYEVPEELSGQTNIHLSK	P17655	N-Term(Dimethyl); K29(Dimethyl)	3288.58				0	0
VGAIPANALDDGQWSQGLISAAR	Q9Y490	N-Term(Dimethyl)	2338.21	1.07983	1.05437	1.03037	0	0
VAAGVLCELAQDKEAAEAIEAEGATAPLTELLHSR	B4DGU4	N-Term(Dimethyl); C7(Carbamidomethyl); K13(Dimethyl)	3689.89				0	1
ASLNPSDTPPSVVNEDFLHDLK	O00116	N-Term(Dimethyl); K22(Dimethyl)	2451.24	0.920052	0.857054	1.08002	0	0
SHFEQWGTLTDCVVMRDPNTKR	F8W6I7	N-Term(Dimethyl); C12(Carbamidomethyl); K21(Dimethyl)	2733.31	0.815299	0.973451	0.842618	0	2
GIEACTNAADALLQCMNVALRPGHDLLLAVK	Q9NV70	N-Term(Dimethyl); C5(Carbamidomethyl); C15(Carbamidomethyl); K31(Dimethyl)	3390.75				0	0
AIGGIILTASHNPGGPNGDFGIK	P36871	N-Term(Dimethyl); K23(Dimethyl)	2262.22				0	0
TVWDWELMNDIKPIWQRPSK	P14625	N-Term(Dimethyl); N9(Deamidated); K12(Dimethyl); K20(Dimethyl)	2627.36				0	0
VIQGDGVDINTLQEIVEGMK	P43490	N-Term(Dimethyl); K20(Dimethyl)	2214.16				0	0
LANVQLLDTDGGFVHSDGAISCHDMFDFLHLTGGGYAK	P68402	N-Term(Dimethyl); C22(Carbamidomethyl); K38(Dimethyl)	4134.95	1.21442	1.45161	0.84168	0	0
SIDAGPVDAWTLAFSPDSQYLATGTHVGK	H0YN81	N-Term(Dimethyl); K29(Dimethyl)	3060.52				0	0
GPAVGIDLGTTYSCVGVFQHGK	P11142	N-Term(Dimethyl); C14(Carbamidomethyl); K22(Dimethyl)	2319.17	0.72537	1.04642	0.697396	0	0
EGYGLSWNPNLSGHLLSASDDHTICLWDISAVPK	Q09028	N-Term(Dimethyl); C25(Carbamidomethyl); K34(Dimethyl)	3808.84				0	0
ENALVQMADGNQAQLAMSHLNGHK	A6NLN1	N-Term(Dimethyl); N21(Deamidated); K24(Dimethyl)	2634.27	1.00553	0.927347	1.09089	0	0
QGSPDQVSPVSEMTSTSLYQDKQEGK	P46821	N-Term(Dimethyl); K22(Dimethyl); K26(Dimethyl)	2910.41	1.15713	0.783635	1.48558	0	1
GQLTTDQVFPYPSVLNEEQTQFLK	P49748	N-Term(Dimethyl); K24(Dimethyl)	2838.45	1.07919	1.08089	1.00448	0	0
AIEALKEFNEDGALAVLQQFK	O60506	N-Term(Dimethyl); K6(Dimethyl); K21(Dimethyl)	2418.33	0.665863	1.03332	0.924718	0	1
GVMGGQSAGPQHTEAETIQK	O60763	N-Term(Dimethyl); K20(Dimethyl)	2082.02	1.18211	1.0594	1.12259	0	0
AYHEQLTVAEITNACFEPANQMVK	Q9BQE3	N-Term(Dimethyl); C15(Carbamidomethyl); K24(Dimethyl)	2820.36	1.30364	1.03819	1.26331	0	0
ILADLEDYLNELWEDKEGK	Q99613	N-Term(Dimethyl); K16(Dimethyl); K19(Dimethyl)	2377.21	1.01514	0.925363	1.10367	0	1
QLFHPEQLITGKEDAANNYAR	P68363;Q9BQE3;F8VQQ4	N-Term(Dimethyl); K12(Dimethyl)	2471.26				0	1
GKDHVVSDFSEHGSLK	P54886	N-Term(Dimethyl); K2(Dimethyl); K16(Dimethyl)	1825.94	0.682164	0.532418	1.28903	0	1
SLSNVIAHEISHSWTGNLVTNK	P09960	N-Term(Dimethyl); K22(Dimethyl)	2463.3	1.05151	1.2159	0.870048	0	0
GFGFVTFDDHDPVDKIVLQK	P22626	N-Term(Dimethyl); K15(Dimethyl); K20(Dimethyl)	2361.24		1.2045		0	1
TSWAGAPVHLGQGQFLK	P48681	N-Term(Dimethyl); K17(Dimethyl)	1853	0.6721	0.42444	1.59311	0	0
GVGAAATAVTQALNELLQHVK	Q9Y490	N-Term(Dimethyl); K21(Dimethyl)	2147.21				0	0
CLAFHDISPQAPTHFLVIPK	P49773	N-Term(Dimethyl); C1(Carbamidomethyl); K20(Dimethyl)	2347.26			0.750051	0	0
EHPVLALPGAPAQFPVLEEHRPLQK	Q9H488	N-Term(Dimethyl); K25(Dimethyl)	2829.57		1.3122		0	0
ILSISADIETIGEILKK	P61978;Q5T6W2	N-Term(Dimethyl); K16(Dimethyl); K17(Dimethyl)	1927.17				0	1
SLDADHAPLQQFFVVMEHCLK	Q96T51	N-Term(Dimethyl); C19(Carbamidomethyl); K21(Dimethyl)	2541.26	1.28647	1.24998	1.03544	0	0
CIALAQLLVEQNFPAIAIHR	Q13838	N-Term(Dimethyl); C1(Carbamidomethyl)	2305.27				0	0
FQSSHHPTDITSLDQYVER	P14625	N-Term(Dimethyl)	2288.09	1.30354	1.30977	1.00381	0	0
ECISIHVGQAGVQIGNACWELYCLEHGIQPDGQMPSDK	P68363;Q9BQE3	N-Term(Dimethyl); C2(Carbamidomethyl); Q9(Deamidated); N16(Deamidated); C18(Carbamidomethyl); C23(Carbamidomethyl); K38(Dimethyl)	4355.02				0	0
GIIWGEDTLMEYLENPKK	C9JFR7	N-Term(Dimethyl); K17(Dimethyl); K18(Dimethyl)	2220.15	0.811641	0.819647	0.996241	0	1
DQAVENILVSPVVVASSLGLVSLGGK	P50454	N-Term(Dimethyl); K26(Dimethyl)	2607.49				0	0
QIPVLQTNNGPSLTGLTTIAAHLVK	O43324	N-Term(Dimethyl); K25(Dimethyl)	2642.51				0	0
SAGQENLETLKSPETQAPLWTPEEINQGAMNPLEK	P48681	N-Term(Dimethyl); K11(Dimethyl); K35(Dimethyl)	3934.97				0	1
TVQLTSSELESTLETLKAENQPIRDVLK	P42704	N-Term(Dimethyl); K17(Dimethyl); K28(Dimethyl)	3226.76	0.800206	0.607542	1.32511	0	2
IIENAENEYQTAISENYQTMSDTTFK	P52907	N-Term(Dimethyl); K26(Dimethyl)	3096.42	1.05685	1.07162	0.992203	0	0
GPEAGYVATPIAMVQAAMTLLSDASHLPK	Q8NBX0	N-Term(Dimethyl); K29(Dimethyl)	2995.56	1.12289	1.32839	0.850428	0	0
FNEEHIPDSPFVVPVASPSGDAR	P21333	N-Term(Dimethyl)	2495.21	0.960688	0.654622	1.26787	0	0
AATFGLILDDVSLTHLTFGK	P35232	N-Term(Dimethyl); K20(Dimethyl)	2175.2	0.964198	1.09018	0.889808	0	0
FTLDCTHPVEDGIMDAANFEQFLQER	P35268	N-Term(Dimethyl); C5(Carbamidomethyl); N18(Deamidated)	3112.42				0	0
NENTFLDLTVQQIEHLNK	A0A087WYS1	N-Term(Dimethyl); K18(Dimethyl)	2212.15				0	0
LGLGIDEDDPTADDTSAAVTEEMPPLEGDDDTSR	P07900	N-Term(Dimethyl)	3575.56				0	0
ENALVQMADGNQAQLAMSHLNGHK	A6NLN1	N-Term(Dimethyl); K24(Dimethyl)	2633.29	0.976769	0.980454	1.00229	0	0
LVQDVANNTNEEAGDGTTTATVLAR	P10809	N-Term(Dimethyl)	2588.27				0	0
IVFDSIDNLEAAPHDIGYVK	Q9UJ70	N-Term(Dimethyl); K20(Dimethyl)	2272.18	1.0547	1.19213	0.890089	0	0
GFGTDEQAIVDVVANR	P20073	N-Term(Dimethyl)	1718.87	1.11391	1.19341	0.939048	0	0
SDALETLGFLNHYQMK	P14866	N-Term(Dimethyl); K16(Dimethyl)	1922.96	1.0273	1.09977	0.939775	0	0
VGRPSNIGQAQPIIDQLAEEAR	Q9UHX1;E9PQ56	N-Term(Dimethyl)	2390.28				0	0
AQVQALGLAEAQPMAVVQSVPGAHPVPVYAFSIK	P29590	N-Term(Dimethyl); K34(Dimethyl)	3529.92				0	0
ENSGAAEKPVTIHATPEGTSEACR	Q9Y6M1	N-Term(Dimethyl); K8(Dimethyl); C23(Carbamidomethyl)	2568.23	0.700014	0.647232	1.08812	0	0
AEDGSVIDYELIDQDAR	P07355	N-Term(Dimethyl)	1936.91	0.701278	0.545167	1.29416	0	0
MLVDDIGDVTITNDGATILK	P17987	N-Term(Dimethyl); K20(Dimethyl)	2160.14	0.824025	1.02332	0.810135	0	0
DGTVLCELINALYPEGQAPVKK	P37802	N-Term(Dimethyl); C6(Carbamidomethyl); K21(Dimethyl); K22(Dimethyl)	2499.34	1.00518	0.523062	1.93339	0	1
LCSLLDSEDYNTCEGAFGALQK	Q92973	N-Term(Dimethyl); C2(Carbamidomethyl); C13(Carbamidomethyl); K22(Dimethyl)	2547.17	1.11817	1.02499	0.934686	0	0
AKDIVPGDIVEIAVGDKVPADIR	P16615	N-Term(Dimethyl); K2(Dimethyl); K17(Dimethyl)	2474.42	1.1249	1.01338	1.11679	0	2
SLAEDFAEQPIKDAVITVPVFFNQAER	A0A087X054	N-Term(Dimethyl); K12(Dimethyl)	3090.62				0	1
GHNGWVTQIATTPQFPDMILSASR	P63244	N-Term(Dimethyl)	2655.33	1.14328	1.01715	1.13083	0	0
MTDIMTEGITIVEDINKR	P61764	N-Term(Dimethyl); K17(Dimethyl)	2135.1	1.10226	0.750832	1.47696	0	1
MQMLEDEDDLAYAETEKK	Q14204	N-Term(Dimethyl); K17(Dimethyl); K18(Dimethyl)	2243.04	0.975427	0.845264	1.16099	0	1
DASIVGFFDDSFSEAHSEFLK	P30101	N-Term(Dimethyl); K21(Dimethyl)	2404.13				0	0
TGPAATTLPDGAAAESLVESSEVAVIGFFK	P07237	N-Term(Dimethyl); K30(Dimethyl)	2991.55	1.4166	1.6254	0.876824	0	0
VVYGGGAAEISCALAVSQEADKCPTLEQYAMR	P48643	N-Term(Dimethyl); C12(Carbamidomethyl); K22(Dimethyl); C23(Carbamidomethyl)	3500.69	1.44235	1.5539	0.933845	0	1
IMRPDDANVAGNVHGGTILK	O00154	N-Term(Dimethyl); K20(Dimethyl)	2134.14	0.734111	0.63377	1.16535	0	0
ALKDPNAFLFDHLLTLKPVK	Q7L2H7	N-Term(Dimethyl); K3(Dimethyl); K17(Dimethyl); K20(Dimethyl)	2392.43				0	1
IVQQIAILMGCAILPHLR	O75533	N-Term(Dimethyl); C11(Carbamidomethyl)	2074.2				0	0
AEIIHHLADLLTDQRDEILLANKK	P54886	N-Term(Dimethyl); K23(Dimethyl); K24(Dimethyl)	2853.61	0.482732	0.397117	1.22297	0	2
CEAFGWHAIIVDGHSVEELCK	P29401	N-Term(Dimethyl); C1(Carbamidomethyl); C20(Carbamidomethyl); K21(Dimethyl)	2513.18	0.987117	1.1064	0.897602	0	0
GALPDDTEALQSLIDTHKEFMK	H3BPE1	N-Term(Dimethyl); K18(Dimethyl); K22(Dimethyl)	2543.3	0.539626	0.56563	0.959817	0	1
AVAFFLESIAMHDIIAAEK	P78527	N-Term(Dimethyl); K19(Dimethyl)	2132.14	0.914419	1.12926	0.814663	0	0
GPVKPTGGPGGGGTQTQQQMNQLK	P26196	N-Term(Dimethyl); K4(Dimethyl); Q15(Deamidated); K24(Dimethyl)	2451.28				0	0
TETVEEPMEEEEAAKEEK	P14625	N-Term(Dimethyl); K15(Dimethyl); K18(Dimethyl)	2192.01				0	1
ISVAGVTSSNVGYLAHAIHQVTK	P00505	N-Term(Dimethyl); K23(Dimethyl)	2408.32	0.776137	0.615772	1.26808	0	0
FLDGNELTLADCNLLPK	O00299	N-Term(Dimethyl); C12(Carbamidomethyl); K17(Dimethyl)	1989.03	0.96191	0.887249	1.09073	0	0
NAIDDGCVVPGAGAVEVAMAEALIK	P40227	N-Term(Dimethyl); C7(Carbamidomethyl); K25(Dimethyl)	2526.29	0.977158	1.02328	0.995564	0	0
HCALALGNCALHGGQAVQR	Q6SZW1	N-Term(Dimethyl); C2(Carbamidomethyl); C9(Carbamidomethyl)	2061.02	1.09613	1.12027	0.984394	0	0
SINTEVVACSVDSQFTHLAWINTPR	Q13162	N-Term(Dimethyl); N3(Deamidated); C9(Carbamidomethyl)	2874.42				0	0
YATDTFAGLCHQLTNALVER	Q9UNS2	N-Term(Dimethyl); C10(Carbamidomethyl)	2308.13				0	0
VYCGPSPSCLVQSSSLSNAHIDYTTKPAIIFR	P51610	N-Term(Dimethyl); C3(Carbamidomethyl); C9(Carbamidomethyl); K26(Dimethyl)	3624.81				0	0
ADDPSSYMEVVQAANTSGNWEELVK	Q00610	N-Term(Dimethyl); K25(Dimethyl)	2796.3	1.03901	1.075	0.969376	0	0
VGIYSPHTAYDAAPQGVNNWLAK	Q9GZT8	N-Term(Dimethyl); K23(Dimethyl)	2528.28	1.47658	1.41754	1.04797	0	0
RYNEDLELEDAIHTAILTLK	P25787	N-Term(Dimethyl); K20(Dimethyl)	2413.29	1.27756	1.32717	0.968466	0	1
LNATNIELATVQPGQNFHMFTK	P28066	N-Term(Dimethyl); K22(Dimethyl)	2530.31	0.961582	0.931147	1.03895	0	0
VEQIAAIAQELNELDYYDSHNVNTR	O43707	N-Term(Dimethyl)	2933.42				0	0
TTTNVLGDSLGAGIVEHLSR	A0A087WT87	N-Term(Dimethyl)	2068.1				0	0
RPLMVLGSQALLTPTSADKLR	A1L0T0	N-Term(Dimethyl); K19(Dimethyl)	2323.34	1.26322	1.59569	0.796449	0	1
QTTVSNSQQAYQEAFEISK	P31946	N-Term(Dimethyl); K19(Dimethyl)	2215.08	1.04147	1.16923	0.896142	0	0
ADKDYHFKVDNDENEHQLSLR	P06748	N-Term(Dimethyl); K3(Dimethyl); K8(Dimethyl)	2657.29	0.921024	0.834403	1.11051	0	2
QSSGPGASSGTSGDHGELVVR	E9PL71	N-Term(Dimethyl)	2012.96				0	0
QFLQAAEAIDDIPFGITSNSDVFSK	P07237	N-Term(Dimethyl); K25(Dimethyl)	2769.39	1.35645	1.48913	0.903319	0	0
SWVNQMESQTGEASKLPYDVTPEQALAHEEVK	P46940	N-Term(Dimethyl); Q9(Deamidated); K15(Dimethyl); K32(Dimethyl)	3686.79				0	1
TECALLGLLLDLKR	P20020	N-Term(Dimethyl); C3(Carbamidomethyl); K13(Dimethyl)	1670.98				0	1
YLPPATQVVLISATLPHEILEMTNK	P38919	N-Term(Dimethyl); K25(Dimethyl)	2834.56	0.944939	0.961955	0.988273	0	0
QTIDNSQGAYQEAFDISKK	P27348	N-Term(Dimethyl); K18(Dimethyl); K19(Dimethyl)	2227.12	0.803443	0.782165	1.03344	0	1
TLHTTASNWLHLIPQTLSHLK	Q14204	N-Term(Dimethyl); K21(Dimethyl)	2467.37	0.981258	1.16224	0.849409	0	0
AVLSAEQLRDEEVHAGLGELLR	P50454	N-Term(Dimethyl)	2433.3				0	1
LGCEVLGVSVDSQFTHLAWINTPR	P32119	N-Term(Dimethyl); C3(Carbamidomethyl)	2727.38	1.51559	1.65339	0.922223	0	0
MVTMVEIDQMVIDGCKK	P52788	N-Term(Dimethyl); C15(Carbamidomethyl); K16(Dimethyl); K17(Dimethyl)	2081.05				0	1
SGKTELAEPIAIRPTSETVMYPAYAK	P07814	N-Term(Dimethyl); K3(Dimethyl); K26(Dimethyl)	2907.54	0.971227	0.931406	1.04908	0	1
ADVLTTGAGNPVGDKLNVITVGPR	P04040	N-Term(Dimethyl); K15(Dimethyl)	2420.34	1.01247	0.850876	1.19713	0	1
YTPSGQAGAAASESLFVSNHAY	P04075	N-Term(Dimethyl)	2256.05	1.35754	1.68152	0.812229	0	0
LSAASTWLEDEGVGATTVMLK	A0A087X054	N-Term(Dimethyl); K21(Dimethyl)	2235.15	1.21722	1.24258	1.07826	0	0
NGTQVHGTITGVDVSMNTHLK	P62314	N-Term(Dimethyl); K21(Dimethyl)	2265.16	0.893035	0.841441	1.11215	0	0
NFYGGNGIVGAQVPLGAGIALACK	P08559	N-Term(Dimethyl); C23(Carbamidomethyl); K24(Dimethyl)	2403.28	0.814381	0.70721	1.15853	0	0
LLQDSVDFSLADAINTEFK	P08670	N-Term(Dimethyl); K19(Dimethyl)	2182.12	1.19771	0.951117	1.25933	0	0
GLVEPVDVVDNADGTQTVNYVPSR	P21333	N-Term(Dimethyl)	2572.29				0	0
VIFHPEFLSSTSPLLPVDYEEFVR	P13807	N-Term(Dimethyl)	2849.47	1.81864	2.09458	0.873528	0	0
FAAEEFKVPAATSAIITNDGIGINPAQTAGNVFLK	P61960	N-Term(Dimethyl); K7(Dimethyl); K35(Dimethyl)	3659.96	2.23621			0	1
ANCDASLIVTEELHLITFETEVYHQGLK	P40763	N-Term(Dimethyl); C3(Carbamidomethyl); K28(Dimethyl)	3286.65				0	0
AYAANSHQGQMLAQYIESFTQGSIEAHKR	Q9NY33	N-Term(Dimethyl); K28(Dimethyl)	3292.6	1.35714	1.25626	1.08686	0	1
GVVGPGPAAIAALGGGGAGPPVVGGGGGR	P22059	N-Term(Dimethyl)	2310.26			1.15388	0	0
AITSGGITYQDQPWHADCFVCVTCSK	Q5JXI8	N-Term(Dimethyl); C18(Carbamidomethyl); C21(Carbamidomethyl); C24(Carbamidomethyl); K26(Dimethyl)	3057.38	2.17799	2.01155	1.08931	0	0
QLFALSCTAEEQGVLPDDLSGVIR	P04899	N-Term(Dimethyl); C7(Carbamidomethyl)	2646.34	1.26165	1.14796	1.1057	0	0
INPYMSSPCHIEMILTEK	A0A087WXM6	N-Term(Dimethyl); C9(Carbamidomethyl); K18(Dimethyl)	2219.08		1.75881		0	0
ETVVEVPQVTWEDIGGLEDVKR	P55072	N-Term(Dimethyl); K21(Dimethyl)	2554.32	1.00051	1.09694	0.917628	0	1
GLESTTLADKDGEIYCK	P21291	N-Term(Dimethyl); K10(Dimethyl); C16(Carbamidomethyl); K17(Dimethyl)	1983.99				0	1
SSSSSSASAAAAAAAASSSASCSR	Q07065	N-Term(Dimethyl); C22(Carbamidomethyl)	2117.93	1.01449	1.07879	0.946104	0	0
VDEFPLCGHMVSDEYEQLSSEALEAAR	X1WI28	N-Term(Dimethyl); C7(Carbamidomethyl)	3110.39				0	0
AWVWNTHADFADECPKPELLAIR	P43487	N-Term(Dimethyl); C14(Carbamidomethyl); K16(Dimethyl)	2795.38	1.25874	1.8682	0.677861	0	0
TFNQVEIKPEMIGHYLGEFSITYKPVK	K7EM56	N-Term(Dimethyl); K8(Dimethyl); K24(Dimethyl); K27(Dimethyl)	3280.76				0	0
QQILHSEEFLSFFDHSTR	Q13409;E7EQL5	N-Term(Dimethyl)	2249.1				0	0
GNDISSGTVLSDYVGSGPPK	P30086	N-Term(Dimethyl); K20(Dimethyl)	2006	1.03609	1.3352	0.780685	0	0
ITVVGVGQVGMACAISILGK	P07195	N-Term(Dimethyl); C13(Carbamidomethyl); K20(Dimethyl)	2029.15	1.31503	1.09715	1.02199	0	0
YHVPVVVVPEGSASDTHEQAILR	P04844	N-Term(Dimethyl)	2531.32	1.20496	1.08824	1.11397	0	0
LLLAGYDDFNCNVWDTLKGDR	Q9HAV0	N-Term(Dimethyl); C11(Carbamidomethyl); K18(Dimethyl)	2541.23	1.29039	1.19444	1.08689	0	1
VMTIPYQPMPASSPVICAGGQDR	Q15365	N-Term(Dimethyl); C17(Carbamidomethyl)	2503.2	1.22605	1.15656	1.06652	0	0
LLGFGSALLDNVDPNPENFVGAGIIQTK	O95782	N-Term(Dimethyl); K28(Dimethyl)	2955.57	1.65553	1.61807	0.725471	0	0
DKEPEVVFIGDSLVQLMHQCEIWR	Q15102	N-Term(Dimethyl); K2(Dimethyl); C20(Carbamidomethyl)	2984.5				0	1
LEGLGSSEADQDGLASTVR	Q07065	N-Term(Dimethyl)	1932.95	1.26344	1.1625	1.09342	0	0
LAELEEFINGPNNAHIQQVGDR	Q00610	N-Term(Dimethyl)	2492.24	0.936108	0.948171	0.993269	0	0
VLRPQVTAVAQQNQGEVPEPQDMK	Q14204	N-Term(Dimethyl); K24(Dimethyl)	2718.42	1.20997	0.844801	1.44094	0	0
VSQMAQYFEPLTLAAVGAASK	Q9Y490	N-Term(Dimethyl); K21(Dimethyl)	2238.18	1.16629	1.19559	0.99344	0	0
HSQAVEELAEQLEQTKR	P35579	N-Term(Dimethyl); K16(Dimethyl)	2052.07				0	1
DHSPDLYSLELAGLDEIGKR	H7C3E1	N-Term(Dimethyl); K19(Dimethyl)	2284.17	0.887433	0.838985	1.06416	0	1
DGNVLLHEMQIQHPTASLIAK	P40227	N-Term(Dimethyl); K21(Dimethyl)	2371.27	0.951283	0.918496	1.04198	0	0
GFGDGYNGYGGGPGGGNFGGSPGYGGGR	P22626	N-Term(Dimethyl)	2523.07				0	0
TYQVCNVMDHSQNNWLR	P29320	N-Term(Dimethyl); C5(Carbamidomethyl)	2192.99	1.13053	1.97163	0.692663	0	0
SQDAEVGDGTTSVTLLAAEFLK	Q99832	N-Term(Dimethyl); K22(Dimethyl)	2308.19				0	0
EEIVDKYDLFVGSQATDFGEALVR	O43852	N-Term(Dimethyl); K6(Dimethyl)	2757.4	0.944474	0.91277	1.04101	0	1
GGEDGPAIAIDLSGINETNDLKR	Q14651	N-Term(Dimethyl); K22(Dimethyl)	2411.24				0	1
AHDGGIYAISWSPDSTHLLSASGDK	O75083	N-Term(Dimethyl); K25(Dimethyl)	2641.28	0.983533	1.01005	0.979654	0	0
NSADGLNMFDGTDSCYFHSGPR	Q04446	N-Term(Dimethyl); C15(Carbamidomethyl)	2476.02	1.43335			0	0
IIANALSSEPACLAEIEEDKAR	P78527	N-Term(Dimethyl); C12(Carbamidomethyl); K20(Dimethyl)	2456.26	0.903592	0.753616	1.11075	0	1
LASVPAGGAVAVSAAPGSAAPAAGSAPAAAEEK	P05387	N-Term(Dimethyl); K33(Dimethyl)	2830.49	2.27147	0.686696	3.3279	0	0
SVNESLNNLFITEEDYQALR	Q00610;K7EJJ5	N-Term(Dimethyl)	2383.17				0	0
LQVELDNVTGLLSQSDSK	P35579	N-Term(Dimethyl); K18(Dimethyl)	2002.07	0.87699	0.831041	1.06169	0	0
CSYQPTMEGVHTVHVTFAGVPIPR	P21333	N-Term(Dimethyl); C1(Carbamidomethyl)	2711.34	1.04469	0.881807	1.19191	0	0
ITSAVWGPLGECIIAGHESGELNQYSAK	Q13347	N-Term(Dimethyl); C12(Carbamidomethyl); K28(Dimethyl)	3043.51				0	0
AQTLPTSVVTITSESSPGKR	Q01082	N-Term(Dimethyl); K19(Dimethyl)	2115.16				0	1
GTLGGLFSQILQGEDIVR	G3V1C3	N-Term(Dimethyl)	1931.06	1.04331	1.10295	0.95167	0	0
DDEEMNTWIQAISSAISSDKHEVSASTQSTPASSR	Q01082	N-Term(Dimethyl); K20(Dimethyl)	3821.78	0.811782	0.647102	1.2621	0	1
ELPQLVASVIESESEILHHEK	Q5T4S7	N-Term(Dimethyl); K21(Dimethyl)	2443.3	0.910822	1.0591	0.865214	0	0
AGAAPYVQAFDSLLAGPVAEYLK	Q01518	N-Term(Dimethyl); K23(Dimethyl)	2407.28	1.03254	1.13573	0.914657	0	0
YFTQGNCVNLTEALSLYEEQLGR	P52788	N-Term(Dimethyl); C7(Carbamidomethyl)	2733.31				0	0
FLEQVHQLYDDSFPMEIR	P42224	N-Term(Dimethyl)	2295.1	2.31433	2.46929	0.942933	0	0
TFTTQETITNAETAKEWFLQAAK	P06744	N-Term(Dimethyl); K15(Dimethyl); K23(Dimethyl)	2713.4	1.09963	2.06804	0.534953	0	1
ARPFPDGLAEDIDKGEVSAR	P13639	N-Term(Dimethyl); K14(Dimethyl)	2199.13			0.793078	0	1
CSENKLPAELQELPGLSHQYWSAPSDKEGYSGVGLLSR	P27695	N-Term(Dimethyl); C1(Carbamidomethyl); K5(Dimethyl); K27(Dimethyl)	4287.14	1.10669	1.33146	0.836228	0	2
VEFATLQEALAHALTEK	A0A087WY61	N-Term(Dimethyl); K17(Dimethyl)	1927.05	0.648318	0.951092	0.685793	0	0
EQTLSPTITSGLHNIAR	O94979	N-Term(Dimethyl)	1866	1.24596	1.17338	1.0683	0	0
ESEIIDFFLGASLKDEVLK	P15880	N-Term(Dimethyl); K14(Dimethyl); K19(Dimethyl)	2237.23	1.09025	1.06284	1.03202	0	1
GSLLGCSIDITSAADSEAITFQK	P17655	N-Term(Dimethyl); C6(Carbamidomethyl); K23(Dimethyl)	2440.22	0.748808	0.813548	0.926009	0	0
GEQGQYLQQDANECWIQMMR	P54578	N-Term(Dimethyl); C14(Carbamidomethyl)	2513.09				0	0
LVFVHSAEGNEFWSALLEK	P07384	N-Term(Dimethyl); K19(Dimethyl)	2232.16				0	0
LVQIEYALAAVAGGAPSVGIK	P25787	N-Term(Dimethyl); K21(Dimethyl)	2083.21	0.914313	1.22904	0.748439	0	0
ANFSLPEKCDYMDEVTYGELEKEEAQPIVTK	Q1KMD3	N-Term(Dimethyl); K8(Dimethyl); C9(Carbamidomethyl); K22(Dimethyl); K31(Dimethyl)	3745.81	0.976437	0.957314	1.02617	0	2
APKPDGPGGGPGGSHMGGNYGDDR	P35637	N-Term(Dimethyl); K3(Dimethyl)	2309.03	0.890893	0.941193	0.896375	0	0
GGSCSQAASSNSAQGSDESLIACK	Q95604;P04222;P30504;Q29963;Q29960	N-Term(Dimethyl); C4(Carbamidomethyl); C23(Carbamidomethyl); K24(Dimethyl)	2428.06				0	0
QYASLTGTQALPPLFSLGYHQSR	Q14697;E9PKU7	N-Term(Dimethyl)	2563.33				0	0
YGKDATNVGDEGGFAPNILENK	P06733	N-Term(Dimethyl); K3(Dimethyl); K22(Dimethyl)	2393.19	1.05638	1.08969	0.975321	0	1
SLQSLEASLHAMESTR	Q9UQE7	N-Term(Dimethyl)	1787.89	1.01186	0.955831	1.06504	0	0
SALSGHLETVILGLLK	P07355	N-Term(Dimethyl); K16(Dimethyl)	1707.03	0.623949	0.513843	1.22165	0	0
LALQQDLTSMAPGLVIQAVR	E5RHW4	N-Term(Dimethyl)	2152.21	1.0438	1.14651	0.915939	0	0
AVDDLNLHSYSNLPIWVNK	Q14204	N-Term(Dimethyl); K19(Dimethyl)	2254.18	0.784732	0.99221	0.795693	0	0
VTEQLIEAINNGDFEAYTK	D6R938;E9PBG7	N-Term(Dimethyl); K19(Dimethyl)	2211.11				0	0
QLSAQGQMTQLCELINK	Q9UNS2	N-Term(Dimethyl); C12(Carbamidomethyl); K17(Dimethyl)	2018.04				0	0
GKGAAAAAAASGAAGGGGGGAGAGAPGGGR	Q68E01	N-Term(Dimethyl); K2(Dimethyl)	2194.1	0.861603	1.03384	0.838455	0	1
VHAELADVLTEAVVDSILAIK	P40227	N-Term(Dimethyl); K21(Dimethyl)	2262.29	1.06634	1.25249	0.85654	0	0
NIDNPALADIYTEHAHQVVVAK	O75083	N-Term(Dimethyl); K22(Dimethyl)	2474.3	0.800796	0.984199	0.81859	0	0
QFEGLADKLSFGLEDEPLETATK	E5RHW4	N-Term(Dimethyl); K8(Dimethyl); K23(Dimethyl)	2622.35	1.11199			0	1
QTIDNSQGAYQEAFDISKK	P27348	N-Term(Dimethyl); Q7(Deamidated); K18(Dimethyl); K19(Dimethyl)	2228.12				0	1
LALVTGGEIASTFDHPELVK	P78371	N-Term(Dimethyl); K20(Dimethyl)	2153.17	0.878308	0.882052	1.0018	0	0
YLEVQYKPQVHIQMTYPLQGLTR	A0A087X105	N-Term(Dimethyl); K7(Dimethyl)	2861.53	0.903759	0.956195	0.950897	0	0
ALDLFSDNAPPPELLEIINEDIAK	Q15084	N-Term(Dimethyl); K24(Dimethyl)	2693.42	1.05261	1.24543	0.833214	0	0
YGGEGAESMMGFFHELLK	Q96HY7	N-Term(Dimethyl); K18(Dimethyl)	2058.96	1.09913	1.0012	1.10447	0	0
NPACSGANICQVKPNDQHFSR	P11717	N-Term(Dimethyl); C4(Carbamidomethyl); C10(Carbamidomethyl); K13(Dimethyl)	2456.15	1.0488	1.34894	0.782217	0	0
GHYTEGAELVDSVLDVVR	Q9BVA1;Q13885;P07437;P68371;Q13509	N-Term(Dimethyl)	1987.01				0	0
SGLAIVSQHDLDQLQADAINAFGESLQK	Q92621	N-Term(Dimethyl); K28(Dimethyl)	3024.56	1.35395	0.843909	1.61412	0	0
LVGQGASAVLLDLPNSGGEAQAK	Q99714	N-Term(Dimethyl); K23(Dimethyl)	2251.22	0.74424	0.749775	0.998642	0	0
LIDWGLAEFYHPGQEYNVR	E7EU96	N-Term(Dimethyl)	2335.14	1.04045	0.963995	1.08587	0	0
FVDGLMIHSGDPVNYYVDTAVR	P23396	N-Term(Dimethyl)	2496.21				0	0
LNEQYEHASIHLWDLLEGK	Q14444	N-Term(Dimethyl); K19(Dimethyl)	2351.19	1.35779	1.31735	1.03695	0	0
LSLQNCCLTGAGCGVLSSTLR	P13489	N-Term(Dimethyl); C6(Carbamidomethyl); C7(Carbamidomethyl); C13(Carbamidomethyl)	2295.12	1.55084	1.53095	1.01914	0	0
NPYYGGESSSITPLEELYKR	P31150	N-Term(Dimethyl); K19(Dimethyl)	2359.18	1.06359	1.25794	0.850629	0	1
SGSGVNPYCGLIEEAYGLDKIEFLQSHENQEIYQK	O60684	N-Term(Dimethyl); C9(Carbamidomethyl); K20(Dimethyl); K35(Dimethyl)	4099.99	0.72964	0.726622	1.01025	0	1
LPVVIGGLLDVDCSEDVIK	Q00610	N-Term(Dimethyl); C13(Carbamidomethyl); K19(Dimethyl)	2097.14	0.909779	1.09645	0.834788	0	0
MMITSQDVLHSWAVPTLGLK	P00403	N-Term(Dimethyl); K20(Dimethyl)	2283.22	0.977886	0.935998	1.05109	0	0
VGLTNYAAAYCTGLLLAR	P46777	N-Term(Dimethyl); C11(Carbamidomethyl)	1955.04				0	0
VAYTEADYYHTELWMEQALR	P13674	N-Term(Dimethyl)	2517.16	1.59367	1.73075	0.92639	0	0
QGAIVAVTGDGVNDSPALKK	P05023	N-Term(Dimethyl); K19(Dimethyl); K20(Dimethyl)	2024.13	1.01436	0.933798	1.09286	0	1
GYDYGPHFQGILEASLEGDSGR	P49327	N-Term(Dimethyl)	2396.1	0.683237	0.56471	1.21723	0	0
AENGKLVINGNPITIFQER	P04406	N-Term(Dimethyl); N3(Deamidated); K5(Dimethyl); N9(Deamidated)	2171.16	1.78211	1.73934	1.03081	0	1
QVKPYVEEGLHPQIIIR	Q99832	N-Term(Dimethyl); K3(Dimethyl)	2075.19	0.962041	0.88797	1.08999	0	0
IIGLDQVAGMSETALPGAFK	P35579	N-Term(Dimethyl); K20(Dimethyl)	2074.12	0.954338	0.949737	1.01094	0	0
TLTAVHDAILEDLVFPSEIVGKR	P62081	N-Term(Dimethyl); K22(Dimethyl)	2579.44				0	1
ASFNHFDKDHGGALGPEEFK	O43707	N-Term(Dimethyl); K8(Dimethyl); K20(Dimethyl)	2287.11	0.889272	0.843901	1.11266	0	1
GQHVTGSPFQFTVGPLGEGGAHK	O75369	N-Term(Dimethyl); K23(Dimethyl)	2364.2				0	0
STVLSLDWHPNNVLLAAGSCDFK	Q92747;O15143	N-Term(Dimethyl); C20(Carbamidomethyl); K23(Dimethyl)	2600.3				0	0
ALSVGNIDDALQCYSEAIK	P31948	N-Term(Dimethyl); C13(Carbamidomethyl); K19(Dimethyl)	2123.06				0	0
CQFGLAQECLHHAQDYGGLLLLATASGNANMVNK	P35606	N-Term(Dimethyl); C1(Carbamidomethyl); C9(Carbamidomethyl); K34(Dimethyl)	3757.81	1.02994	1.1413	0.907901	0	0
VVETDPSPYCIVAPDTVIHCEGEPIKR	P55072	N-Term(Dimethyl); C10(Carbamidomethyl); C20(Carbamidomethyl); K26(Dimethyl)	3137.56	1.51496	1.41476	0.845926	0	1
TDVNKIEEFLEEVLCPPK	Q9Y696	N-Term(Dimethyl); K5(Dimethyl); C15(Carbamidomethyl); K18(Dimethyl)	2244.18				0	1
TLTAVHDAILEDLVFPSEIVGK	P62081	N-Term(Dimethyl); K22(Dimethyl)	2423.34				0	0
GPDGELHANLLCPVDVLDVPEGTLPDK	P22304	N-Term(Dimethyl); C12(Carbamidomethyl); K27(Dimethyl)	2926.48				0	0
GDFLFSSDHLIEMATK	E9PDF6	N-Term(Dimethyl); K16(Dimethyl)	1866.93				0	0
VLLVGADNFTLLGKPLLGK	Q7Z2W9	N-Term(Dimethyl); K14(Dimethyl); K19(Dimethyl)	2052.28	1.01352	0.774663	1.31628	0	0
NTVEIFKFEEAENSLLHLK	J3QT77	N-Term(Dimethyl); K7(Dimethyl); K19(Dimethyl)	2345.27				0	1
RKLEGDSTDLSDQIAELQAQIAELK	P35579	N-Term(Dimethyl); K2(Dimethyl); K25(Dimethyl)	2855.52				0	2
LASEAKPAAVAAENEEIGSHIK	Q9Y490	N-Term(Dimethyl); K6(Dimethyl); K22(Dimethyl)	2319.25				0	0
SLVASLAEPDFVVTDFAK	P22314	N-Term(Dimethyl); K18(Dimethyl)	1965.05	1.00878	1.149	0.883293	0	0
HTGPGILSMANAGPNTNGSQFFICTAK	P62937	N-Term(Dimethyl); M9(Oxidation); N17(Deamidated); C24(Carbamidomethyl); K27(Dimethyl)	2864.37	1.00685	1.14068	0.888033	0	0
TIDGQQTIIACIESHQFQPK	P52907	N-Term(Dimethyl); C11(Carbamidomethyl); K20(Dimethyl)	2370.21	0.684524	0.936849	0.735101	0	0
QTQTFTTYSDNQPGVLIQVYEGER	P11142	N-Term(Dimethyl)	2802.35	1.44634	0.989249	1.47093	0	0
ALDEYYDKHFTEFVPLR	P38606	N-Term(Dimethyl); K8(Dimethyl)	2199.11	0.99772	1.10485	0.908519	0	1
SLSVYHPQLAYCVVQFLEK	Q13362;E9PFR3	N-Term(Dimethyl); C12(Carbamidomethyl); K19(Dimethyl)	2337.23				0	0
VGMGSGSICITQEVLACGRPQATAVYK	P12268	N-Term(Dimethyl); C9(Carbamidomethyl); C17(Carbamidomethyl); K27(Dimethyl)	2909.46	0.873461	0.759659	1.15678	0	0
LLKPGGVLTYCNLTSWGELMK	Q14353	N-Term(Dimethyl); K3(Dimethyl); C11(Carbamidomethyl); K21(Dimethyl)	2464.33	1.09172	1.35723	0.809258	0	0
STSESFIQHIVSLVHHVK	E9PK91	N-Term(Dimethyl); K18(Dimethyl)	2104.15				0	0
LTESPCALVASQYGWSGNMER	P14625	N-Term(Dimethyl); C6(Carbamidomethyl)	2384.1	1.47156	1.65844	0.892703	0	0
AIGSASEGAQSSLQEVYHK	P28066	N-Term(Dimethyl); K19(Dimethyl)	2018.01	1.17211	1.17991	0.999417	0	0
GPLLHISPAEELYFGSTESGEKK	R4GMN1	N-Term(Dimethyl); K22(Dimethyl); K23(Dimethyl)	2573.34	0.858334	1.54884	0.557541	0	1
YIYVADILAHEIHVLEK	J3QT77	N-Term(Dimethyl); K17(Dimethyl)	2082.15	0.994254	1.03631	0.965244	0	0
SHMMDVQGSTQDSAIKDFVLK	P13667	N-Term(Dimethyl); K16(Dimethyl); K21(Dimethyl)	2421.21	1.23334	1.35982	0.91249	0	1
ALGALVDSCAPGLCPDWDSWDASKPVTNAR	P21333	N-Term(Dimethyl); C9(Carbamidomethyl); C14(Carbamidomethyl); K24(Dimethyl)	3285.56				0	0
NITLSLVANPSHLEAADPVVMGK	Q02218	N-Term(Dimethyl); K23(Dimethyl)	2432.32	0.893664	0.826285	1.08811	0	0
ELMGEEILGASLSAPLTSYK	Q9P2J5	N-Term(Dimethyl); K20(Dimethyl)	2165.14				0	0
DVNLRPEQLGDICVGNVLQPGAGAIMAR	P09110	N-Term(Dimethyl); C13(Carbamidomethyl); N16(Deamidated)	2992.55				0	0
CFGFVTYSNVEEADAAMAASPHAVDGNTVELK	Q13151	N-Term(Dimethyl); C1(Carbamidomethyl); K32(Dimethyl)	3456.62	0.769067	0.643838	1.20175	0	0
GEELGGGQDPVQLLSGFPR	E9PJ81	N-Term(Dimethyl)	1984.01	1.29464			0	0
YGKDATNVGDEGGFAPNILENKEGLELLK	P06733	N-Term(Dimethyl); K3(Dimethyl); K22(Dimethyl); K29(Dimethyl)	3203.67				0	2
QKGADFLVTEVENGGSLGSK	P14618	N-Term(Dimethyl); K2(Dimethyl); K20(Dimethyl)	2120.12	1.08989	1.53502	0.714323	0	1
VRAPMVNPTLGVHEADLLK	Q13423	N-Term(Dimethyl); K19(Dimethyl)	2116.19	0.819626	0.799989	1.03076	0	1
RPLIDQVVQTALSETQDPEEVSVTVK	Q00610	N-Term(Dimethyl); K26(Dimethyl)	2937.57				0	0
IIPTLEEGLQLPSPTATSQLPLESDAVECLNYQHYK	P61978	N-Term(Dimethyl); C29(Carbamidomethyl); K36(Dimethyl)	4111.09	0.992986	0.974798	1.02484	0	0
FQDLGAAYEVLSDSEKR	Q9UBS4	N-Term(Dimethyl); K16(Dimethyl)	1983.99	1.12867	0.962922	1.00357	0	1
ALFDFNGNDEEDLPFKK	P46108	N-Term(Dimethyl); K16(Dimethyl); K17(Dimethyl)	2083.02				0	1
TDNAGDQHGGGGGGGGGAGAAGGGGGGENYDDPHKTPASPVVHIR	P14866	N-Term(Dimethyl); K35(Dimethyl)	4094.85	1.13544	1.06434	1.07328	0	1
ALFEEVPELLTEAEKK	P31939	N-Term(Dimethyl); K15(Dimethyl); K16(Dimethyl)	1930.07				0	1
GNFTLPEVAECFDEITYVELQKEEAQK	Q00839	N-Term(Dimethyl); C11(Carbamidomethyl); K22(Dimethyl); K27(Dimethyl)	3271.59	1.00976	1.06315	0.955539	0	1
AIEPPPLDAVIEAEHTLR	Q08211	N-Term(Dimethyl)	1999.08	0.937517	0.840993	1.12154	0	0
VAHALAEGLGVIACIGEK	P60174	N-Term(Dimethyl); C14(Carbamidomethyl); K18(Dimethyl)	1864.03	0.534771	1.47283	0.353675	0	0
ASASGSGAQVGGPISSGSSASSVTVTR	P02545	N-Term(Dimethyl)	2393.18				0	0
ALIQLPPYISQCDEVLQFFETRPEDLNPPKEEHIGK	A1X283	N-Term(Dimethyl); C12(Carbamidomethyl); K30(Dimethyl); K36(Dimethyl)	4335.24	1.36156	0.749479	1.20307	0	1
HHNQSTAINLNNPESQSMHLETR	Q14152	N-Term(Dimethyl); N11(Deamidated)	2687.27	1.18266			0	0
ILNHVLQHAEPGNAQSVLEAIDTYCEQK	P21964	N-Term(Dimethyl); C25(Carbamidomethyl); K28(Dimethyl)	3233.6		2.90598		0	0
AGVAAPATQVAQVTLQSVQR	Q15149	N-Term(Dimethyl)	2023.13	1.11024	0.864152	1.29257	0	0
FKKEDEIPETVSLEMLDAAK	F8W7Q4	N-Term(Dimethyl); K2(Dimethyl); K3(Dimethyl); K20(Dimethyl)	2405.28	1.22631	1.4844	0.831143	0	2
TVWDWELMNDIKPIWQRPSK	P14625	N-Term(Dimethyl); K12(Dimethyl); K20(Dimethyl)	2626.38	1.40889	1.57678	0.898945	0	0
AFVHWYVGEGMEEGEFSEAR	P68363;Q9BQE3	N-Term(Dimethyl)	2358.04				0	0
FGNPLLVQDVESYDPVLNPVLNR	Q14204	N-Term(Dimethyl)	2626.37	1.04292	0.861121	1.21847	0	0
LVHSLFESIMSTQESSNPNNVLK	O15067	N-Term(Dimethyl); K23(Dimethyl)	2630.35	1.05331			0	0
ENTEGEYSGIEHVIVDGVVQSIK	P50213	N-Term(Dimethyl); K23(Dimethyl)	2558.29				0	0
SQGLSQLYHNQSQGLLSQLQGQSK	D3DQV9	N-Term(Dimethyl); K24(Dimethyl)	2685.39	0.839355	0.83855	1.00703	0	0
NMDPLNDNIATLLHQSSDKFVSELWK	P35579	N-Term(Dimethyl); K19(Dimethyl); K26(Dimethyl)	3099.57	0.931272	0.906862	1.03315	0	1
QNVAYEYLCHLEEAKR	P46940	N-Term(Dimethyl); C9(Carbamidomethyl); K15(Dimethyl)	2079.03	0.970597	0.933653	1.04588	0	1
IVQTYHVNMAGTNPYTTITPQEINGK	P12814	N-Term(Dimethyl); K26(Dimethyl)	2946.49	0.757241	0.606638	1.10627	0	0
APVQPQQSPAAAPGGTDEKPSGK	Q13200	N-Term(Dimethyl); K19(Dimethyl); K23(Dimethyl)	2302.2				0	0
ILDDDTIITTLENLKR	Q14204	N-Term(Dimethyl); K15(Dimethyl)	1929.08	0.808931	0.865183	0.940656	0	1
EKDILVLPLDLTDTGSHEAATK	Q9Y394	N-Term(Dimethyl); K2(Dimethyl); K22(Dimethyl)	2450.33	1.45132	1.69324	0.862328	0	1
EEFTAFLHPEEYDYMK	O43852	N-Term(Dimethyl); K16(Dimethyl)	2104.95	1.02515	1.09775	0.939528	0	0
RTPMGIVLDALEQQEEGINR	O75915	N-Term(Dimethyl)	2297.18	0.975086	1.11318	0.951539	0	1
AWRDPDEPVLLEEPVVLALAEK	P14550	N-Term(Dimethyl); K22(Dimethyl)	2545.38				0	1
AFLTGPHISLADLVAITELMHPVGAGCQVFEGRPK	P30711	N-Term(Dimethyl); C27(Carbamidomethyl); K35(Dimethyl)	3788				0	0
QDLPNAMNAAEITDKLGLHSLR	P61204	N-Term(Dimethyl); K15(Dimethyl)	2463.3	1.0052	1.40875	0.71787	0	1
ALPLTQGQLVLVWSDEHVGSK	P35475	N-Term(Dimethyl); K21(Dimethyl)	2333.29				0	0
RQFASQANVVGPWIQTK	O43707	N-Term(Dimethyl); K17(Dimethyl)	1986.09	0.890047	0.892886	1.00287	0	1
GADDAMESSKPGPVQVVLVQK	Q6DD88	N-Term(Dimethyl); K10(Dimethyl); K21(Dimethyl)	2239.19	0.877981	0.888874	1.00049	0	0
SALTIQLIQNHFVDEYDPTIEDSYRK	P01112;P01116;P01111	N-Term(Dimethyl); K26(Dimethyl)	3151.59				0	1
NIILEEGKEILVGDVGQTVDDPYATFVK	G3V1A4	N-Term(Dimethyl); K8(Dimethyl); Q17(Deamidated); K28(Dimethyl)	3147.69				0	1
TVFAEHISDECKR	P39023	N-Term(Dimethyl); C11(Carbamidomethyl); K12(Dimethyl)	1647.81	1.1652	1.04154	1.11822	0	1
SALVQIYELEEHKIETWR	P54619	N-Term(Dimethyl); K13(Dimethyl)	2300.22	1.22797	1.30896	0.943822	0	1
HAEPEQNWEAVDGSQTETEKK	P11717	N-Term(Dimethyl); K20(Dimethyl); K21(Dimethyl)	2497.18				0	1
GAHNGQGLGNAFLSHISACDGIFHLTR	Q9NTK5	N-Term(Dimethyl); C19(Carbamidomethyl)	2878.41	1.08297	1.33794	0.814344	0	0
IHQIGPGMVQQIQSVCMECQGHGER	P31689	N-Term(Dimethyl); C16(Carbamidomethyl); C19(Carbamidomethyl)	2907.34	0.308394			0	0
QTIGNSCGTIGLIHAVANNQDKLGFEDGSVLK	P09936	N-Term(Dimethyl); N5(Deamidated); C7(Carbamidomethyl); K22(Dimethyl); K32(Dimethyl)	3441.76				0	1
MAEDEAETIGNLIEECGGLEK	O00629	N-Term(Dimethyl); C16(Carbamidomethyl); K21(Dimethyl)	2364.08	0.923589	0.958026	0.969905	0	0
LAAAQAAGLAAAHSVR	K7EN58	N-Term(Dimethyl)	1505.85	1.14826	1.29273	0.893635	0	0
GHYTEGAELVDSVLDVVRK	Q9BVA1;Q13885;P07437;P68371;Q13509	N-Term(Dimethyl); K19(Dimethyl)	2143.13				0	1
ALAAAGYDVEKNNSR	P16403	N-Term(Dimethyl); K11(Dimethyl)	1634.85	0.871026	0.995924	0.879898	0	1
VIISAPSADAPMFVMGVNHEK	P04406	N-Term(Dimethyl); N18(Deamidated); K21(Dimethyl)	2270.14				0	0
DAFDRNPELQNLLLDDFFK	P52209	N-Term(Dimethyl); K19(Dimethyl)	2366.2	1.08899	1.44253	0.759496	0	1
NINADEAAAMGAVYQAAALSK	A0A087X054	N-Term(Dimethyl); K21(Dimethyl)	2135.07	0.672214	1.22264	0.553141	0	0
GCSKPLCCSCALLDSSHSELK	P29590	N-Term(Dimethyl); C2(Carbamidomethyl); K4(Dimethyl); C7(Carbamidomethyl); C8(Carbamidomethyl); C10(Carbamidomethyl); K21(Dimethyl)	2493.15				0	0
MLSAVSQQVQCIQEALR	Q14204	N-Term(Dimethyl); C11(Carbamidomethyl)	1989.02				0	0
GNVVFGEPITASLGIDGTHYWSK	Q14195	N-Term(Dimethyl); K23(Dimethyl)	2504.27	0.968686	1.19979	0.724087	0	0
TFHETLDCCGSSTLTALTTSVLK	E9PJK1	N-Term(Dimethyl); C8(Carbamidomethyl); C9(Carbamidomethyl); K23(Dimethyl)	2598.27				0	0
ETIEDVEEMLNNLPGVTSVHSR	Q9UNM6	N-Term(Dimethyl)	2497.22				0	0
TTLPQDCSNPAPLSSPLNGVHDR	P16278	N-Term(Dimethyl); C7(Carbamidomethyl)	2504.21	1.46689	1.73179	0.852179	0	0
LEGVLAEVAQHYQDTLIR	P46940	N-Term(Dimethyl)	2083.11				0	0
VVQGDIGEANEDVTQIVEILHSGPSK	Q86XP3	N-Term(Dimethyl); K26(Dimethyl)	2790.45	1.04608	1.00495	1.04725	0	0
TAFDDAIAELDTLNEDSYK	P61981	N-Term(Dimethyl); K19(Dimethyl)	2187.03	1.09202	1.2605	0.871596	0	0
SKVDEAVAVLQAHHAK	B1ANR0	N-Term(Dimethyl); K2(Dimethyl); K16(Dimethyl)	1787.01	0.877171	0.863275	1.02226	0	1
EINNAHAILTDATKR	Q9H3Z4	N-Term(Dimethyl); K14(Dimethyl)	1722.95	0.800584	0.846979	0.95096	0	1
SMGGKEDLIWELLNQAQEHFGK	P02787	N-Term(Dimethyl); K5(Dimethyl); K22(Dimethyl)	2614.31				0	1
LSENNIQTIFAVTEEFQPVYK	P05556	N-Term(Dimethyl); K21(Dimethyl)	2526.3	0.933203	1.03479	0.907303	0	0
TISAQNMDILQNPLMIK	P17050	N-Term(Dimethyl); K17(Dimethyl)	1986.07	0.986661	1.39357	0.712309	0	0
EDGNEEDKENQGDETQGQQPPQR	P67809	N-Term(Dimethyl); K8(Dimethyl)	2684.16	0.790096	0.811393	1.01119	0	1
EVIELPVKHPELFEALGIAQPK	P62195	N-Term(Dimethyl); K8(Dimethyl); K22(Dimethyl)	2541.46	0.989832	1.00736	0.988566	0	1
EVHDQLLQLHSIQLQLHAK	Q9HD26	N-Term(Dimethyl); K19(Dimethyl)	2306.29				0	0
EKLQEEMLQREEAENTLQSFR	P08670	N-Term(Dimethyl); K2(Dimethyl)	2664.32	0.826909	0.682387	1.21914	0	2
AQHVFQHAVPQEGKPITNQK	Q13867	N-Term(Dimethyl); K14(Dimethyl); K20(Dimethyl)	2341.28	0.898767	1.1	0.822017	0	0
ILDLGITGPEGHVLSRPEEVEAEAVNR	Q16555	N-Term(Dimethyl)	2928.54				0	0
VLELSIPASAEQIQHLAGAIAER	P55268	N-Term(Dimethyl)	2444.35				0	0
YTQLQYIGEGAYGMVSSAYDHVR	P27361	N-Term(Dimethyl)	2636.24	1.41965	1.5019	0.950971	0	0
SITVNDLTHLLEAAEK	Q8IVG5	N-Term(Dimethyl); K16(Dimethyl)	1809.99	1.60299	2.68921	0.599701	0	0
VNSTANAETQATSAFQTQKPLK	P06400	N-Term(Dimethyl); K19(Dimethyl); K22(Dimethyl)	2419.27	0.778678	0.873148	0.897217	0	0
HFLLEEDKPEEPTAHAFVSTLTR	P49327	N-Term(Dimethyl); K8(Dimethyl)	2723.4	0.849688	0.634023	1.34829	0	0
ESTGAQVQVAGDMLPNSTER	Q15365;Q15366;F8VZX2	N-Term(Dimethyl)	2118.01				0	0
LADDVDLEQVANETHGHVGADLAALCSEAALQAIR	P55072	N-Term(Dimethyl); Q9(Deamidated); N12(Deamidated); C26(Carbamidomethyl)	3702.82	1.11811	0.959298	1.17262	0	0
GFQQILAGEYDHLPEQAFYMVGPIEEAVAK	P06576	N-Term(Dimethyl); K30(Dimethyl)	3406.71	5.48197	1.45769	3.78354	0	0
DTNGENIAESLVAEGLATR	Q7KZF4	N-Term(Dimethyl); N3(Deamidated)	1988.96				0	0
NEEVLAVLGHELGHWK	O75844	N-Term(Dimethyl); K16(Dimethyl)	1887.01			0.985429	0	0
NATNVEQSFMTMAAEIK	P62820	N-Term(Dimethyl); K17(Dimethyl)	1940.94	1.00077	1.0355	0.972326	0	0
VDKGVVPLAGTNGETTTQGLDGLSER	P04075	N-Term(Dimethyl); K3(Dimethyl)	2670.38	1.09283	1.289	0.852959	0	1
EQVPSLGSNVACGLAYTDYHK	A1L0T0	N-Term(Dimethyl); C12(Carbamidomethyl); K21(Dimethyl)	2365.14	1.38157	1.34976	1.02978	0	0
YWPQEAGEYAVHVLCNSEDIR	P21333	N-Term(Dimethyl); C15(Carbamidomethyl)	2564.18	0.993634	0.808834	1.23593	0	0
FCSGDLGPEGILPDTHLLDPLLK	Q6PCB7	N-Term(Dimethyl); C2(Carbamidomethyl); K23(Dimethyl)	2563.34	1.15105	1.47091	0.787291	0	0
NEEDAAELVALAQAVNAR	P22314	N-Term(Dimethyl)	1911.97	1.04337	1.03502	1.01418	0	0
YGDGGSSFQSTTGHCVHMR	P55795	N-Term(Dimethyl); C15(Carbamidomethyl)	2111.9	1.41017	1.12358	1.28854	0	0
LLEVPVMLTEQYPQGLGPTVPELGTEGLRPLAK	K7ENV7	N-Term(Dimethyl); K33(Dimethyl)	3601.97	0.926806	0.746016	1.24988	0	0
TGEAQIHAHLVRPYVGIHLR	Q9H488	N-Term(Dimethyl)	2295.27	1.23938	1.41571	0.880759	0	0
NELMYQLEQDHDLQAILQER	Q08211	N-Term(Dimethyl)	2514.23	0.816757	0.875416	0.938654	0	0
AENGKLVINGNPITIFQERDPSK	P04406	N-Term(Dimethyl); N3(Deamidated); K5(Dimethyl); K23(Dimethyl)	2625.42	1.19259	1.42358	0.842824	0	2
TVLGTPEVLLGALPGAGGTQR	P40939	N-Term(Dimethyl)	2035.15	0.932917	0.84307	1.11329	0	0
GIIVHTMAAVEALGAK	O95573	N-Term(Dimethyl); K16(Dimethyl)	1636.94	1.04828	0.775669	1.35965	0	0
GKEDEGEEAASPMLQIQR	Q14204	N-Term(Dimethyl); K2(Dimethyl)	2043.99	0.813826	0.88777	0.922272	0	1
QVEVTVHKGDECQLVGPAQPSHWK	Q15149	N-Term(Dimethyl); K8(Dimethyl); C12(Carbamidomethyl); K24(Dimethyl)	2813.43	0.873176	0.970042	0.905606	0	1
VFTTQELVQAFTHAPATLEADRGGK	O95433	N-Term(Dimethyl); K25(Dimethyl)	2743.44	0.837974	0.655704	1.28573	0	1
MVRPNQDGTLIASCSNDQTVR	P43034	N-Term(Dimethyl); C14(Carbamidomethyl)	2390.15				0	0
LVPLLLEDGGEAPAALEAALEEK	Q14204	N-Term(Dimethyl); K23(Dimethyl)	2404.32	0.845482	0.971061	0.875962	0	0
AQPVQVAEGSEPDGFWEALGGK	A0A0A0MS51	N-Term(Dimethyl); K22(Dimethyl)	2328.14	1.33429	1.75624	0.688885	0	0
LGGIVLPNDGQCHLENNMYTMSHYYDYPSIAHLVQK	P05556	N-Term(Dimethyl); C12(Carbamidomethyl); K36(Dimethyl)	4234.01				0	0
ANALHATNNLQIIPDFSLK	Q9P2R3	N-Term(Dimethyl); K19(Dimethyl)	2136.18	0.902809	1.438	0.631631	0	0
GVGTDEACLIEILASR	P50995	N-Term(Dimethyl); C8(Carbamidomethyl)	1731.89	1.36214	1.4595	0.938957	0	0
FSDLFSLAEEYEDSSTKPPK	Q68E01	N-Term(Dimethyl); K17(Dimethyl); K20(Dimethyl)	2374.16	0.921422	1.15433	0.803074	0	0
ANLLNNEAHAITMQVTK	P46063	N-Term(Dimethyl); K17(Dimethyl)	1924.03	0.804366	0.971914	0.832633	0	0
VPSTETEALASNLMGMFEK	P31150	N-Term(Dimethyl); K19(Dimethyl)	2111.04	0.790422	1.0055	0.790871	0	0
IPIHNEDITYDELVLMMQR	Q92734	N-Term(Dimethyl)	2358.18	1.27326	1.32619	0.965915	0	0
TDLEKDIISDTSGDFRK	P07355	N-Term(Dimethyl); K5(Dimethyl); K17(Dimethyl)	2024.05	0.74773	0.471664	1.59493	0	2
DGSDYEGWCWPGSAGYPDFTNPTMR	Q14697;E9PKU7	N-Term(Dimethyl); C9(Carbamidomethyl)	2894.18				0	0
AADKLIQNLDANHDGR	Q96FQ6	N-Term(Dimethyl); K4(Dimethyl)	1806.94				0	1
VLFRPSDTANSSNQDALSSNTSLK	Q8N4V1	N-Term(Dimethyl); K24(Dimethyl)	2608.32	1.05775	1.06143	1.00258	0	0
AEQINQAAGEASAVLAK	Q9UJZ1	N-Term(Dimethyl); K17(Dimethyl)	1726.93	0.795633	0.975123	0.820883	0	0
TKIDCDNLEQYFIQQGGGPDK	A0A087X2G1	N-Term(Dimethyl); K2(Dimethyl); C5(Carbamidomethyl); K21(Dimethyl)	2510.22	0.739992	0.788215	0.944518	0	1
TGDFQLHTNVNDGTEFGGSIYQK	A0A0A0MR02	N-Term(Dimethyl); N11(Deamidated); K23(Dimethyl)	2585.23				0	0
QAAASATQTIAAAQHAASTPK	Q9Y490	N-Term(Dimethyl); K21(Dimethyl)	2051.08				0	0
NQLDQEVEFLSTSIAQLK	Q99471	N-Term(Dimethyl); K18(Dimethyl)	2119.12				0	0
SVLTGGLDALEFIGKK	Q8IWE2	N-Term(Dimethyl); K15(Dimethyl); K16(Dimethyl)	1732.02	0.526838	0.827393	0.640609	0	1
EQCTAGAGCCLQPATGR	P24821;J3QSU6	N-Term(Dimethyl); C3(Carbamidomethyl); C9(Carbamidomethyl); C10(Carbamidomethyl)	1864.8				0	0
GIVDQSQQAYQEAFEISK	P63104	N-Term(Dimethyl); K18(Dimethyl)	2097.04	1.00119	1.24491	0.809105	0	0
LGGTIDDCELVEGLVLTQK	P50991	N-Term(Dimethyl); C8(Carbamidomethyl); K19(Dimethyl)	2116.12	0.887392	1.1044	0.808383	0	0
DGPLNMILDDGGDLTNLIHTK	P23526	N-Term(Dimethyl); K21(Dimethyl)	2308.17	0.969075	1.07941	0.903227	0	0
DLYANTVLSGGTTMYPGIADR	P60709	N-Term(Dimethyl)	2243.1	1.35702	1.23473	1.10131	0	0
QIANSQDGYVWQVTDMNR	P10155	N-Term(Dimethyl)	2153	1.10631	1.12355	0.990631	0	0
DVHNIYGLYVHMATADGLR	Q14697;E9PKU7	N-Term(Dimethyl)	2173.08				0	0
VIISAPSADAPMFVMGVNHEK	P04406	N-Term(Dimethyl); K21(Dimethyl)	2269.17	0.884613	1.28402	0.944043	0	0
AGQVVTIWAAGAGATHSPPTDLVWK	P02545	N-Term(Dimethyl); K25(Dimethyl)	2589.37				0	0
SGSKFPVFNMSYNPAENAVLLCTR	P53621	N-Term(Dimethyl); K4(Dimethyl); C22(Carbamidomethyl)	2758.36				0	1
ETKPEPMEEDLPENKK	P31948	N-Term(Dimethyl); K3(Dimethyl); K15(Dimethyl); K16(Dimethyl)	2026.03	0.665923	0.684217	0.97917	0	1
TAEELMNFSKGEENLMDAQVK	P50990	N-Term(Dimethyl); K10(Dimethyl); K21(Dimethyl)	2468.2	0.778488	0.812842	0.808007	0	1
IDNSQVESGSLEDDWDFLPPKK	P27797	N-Term(Dimethyl); K21(Dimethyl); K22(Dimethyl)	2603.28	1.08136	1.24597	0.84317	0	1
DIYYNNMEEVCGGEKPYLSPDILEEK	Q6DD88	N-Term(Dimethyl); C11(Carbamidomethyl); K15(Dimethyl); K26(Dimethyl)	3189.49	0.809808	0.835297	0.975368	0	0
SKEEQELHDIHSTR	P51674	N-Term(Dimethyl); K2(Dimethyl)	1764.88	1.31709	1.48823	0.883331	0	1
GLDVDSLVIEHIQVNKAPK	A0A087WXM6	N-Term(Dimethyl); K16(Dimethyl); K19(Dimethyl)	2159.24	0.890701	0.781911	1.14605	0	1
HILLAVANDEELNQLLK	O75367;Q9P0M6	N-Term(Dimethyl); K17(Dimethyl)	1989.13				0	0
AVEEKIEWLESHQDADIEDFK	P11021	N-Term(Dimethyl); K5(Dimethyl); K21(Dimethyl)	2615.29				0	1
QLQELEDKQNADISAMQDTINKLENELR	P07196	N-Term(Dimethyl); K8(Dimethyl); K22(Dimethyl)	3370.7	0.78609	0.468248	1.68898	0	2
EAILLHFSTDPVAASIMK	Q9BZV1	N-Term(Dimethyl); K18(Dimethyl)	1999.09	0.36364	0.365027	1.00225	0	0
QLAPIWDKLGETYKDHENIVIAK	P07237	N-Term(Dimethyl); K8(Dimethyl); K14(Dimethyl); K23(Dimethyl)	2793.55	1.25275	1.41166	0.892815	0	2
SVGMIAGGTGITPMLQVIR	P00387	N-Term(Dimethyl)	1929.06	1.29202	1.09478	1.18733	0	0
CSPTLLLLNGQAACHMAQGR	A0A087X0I4	N-Term(Dimethyl); C1(Carbamidomethyl); N9(Deamidated); C14(Carbamidomethyl)	2227.07				0	0
TVNELQNLTSAEVIVPR	Q9Y6M1	N-Term(Dimethyl)	1911.05	0.848531	0.801046	1.06571	0	0
RPLDDGVGNQLGALVHQR	Q96I24	N-Term(Dimethyl)	1973.06	0.975792	0.807978	1.21503	0	0
IDQLEGDHQLIQEALIFDNK	P12814	N-Term(Dimethyl); K20(Dimethyl)	2395.25				0	0
FGVEQDVDMVFASFIR	P14618;H3BR70	N-Term(Dimethyl)	1887.93				0	0
LGNNCVFAPADVTSEKDVQTALALAK	Q99714	N-Term(Dimethyl); C5(Carbamidomethyl); K16(Dimethyl); K26(Dimethyl)	2816.48	0.863197	0.435356	1.99477	0	1
TAFDEAIAELDTLNEDSYK	P27348	N-Term(Dimethyl); K19(Dimethyl)	2201.04				0	0
FATLAELVQYYMEHHGQLK	Q06124	N-Term(Dimethyl); K19(Dimethyl)	2334.19				0	0
GTDECAIESIAVAATPIPK	P53634	N-Term(Dimethyl); C5(Carbamidomethyl); K19(Dimethyl)	1999.04	3.85435	1.84135	1.86214	0	0
IPNIYAIGDVVAGPMLAHK	P09622	N-Term(Dimethyl); K19(Dimethyl)	2035.14	0.929823	0.926993	1.13593	0	0
AKDINQEVYNFLATAGAK	Q99798	N-Term(Dimethyl); K2(Dimethyl); K18(Dimethyl)	2037.09	1.32028	0.914801	1.452	0	1
GLGTDEDTLIEILASR	P04083	N-Term(Dimethyl)	1730.91	0.917503	1.26677	0.954613	0	0
GSDCGIVNVNIPTSGAEIGGAFGGEK	P49419	N-Term(Dimethyl); C4(Carbamidomethyl); K26(Dimethyl)	2562.24	1.11442	0.95895	1.16917	0	0
NLHQSGFSLSGAQIDDNIPR	Q16555	N-Term(Dimethyl)	2197.09	1.32866	1.52334	0.87749	0	0
LNKPFLFDTKPLIVQYEVNFQNGIECGGAYVK	P27824	N-Term(Dimethyl); K3(Dimethyl); K10(Dimethyl); C26(Carbamidomethyl); K32(Dimethyl)	3814.02				0	0
EFASHLQQLQDALNELTEEHSK	A0A087WY61	N-Term(Dimethyl); K22(Dimethyl)	2623.3				0	0
SDIYVCMISYAHNVAAQGK	P31150	N-Term(Dimethyl); C6(Carbamidomethyl); K19(Dimethyl)	2183.05				0	0
AMDLHAVLAELPRPR	Q9NSY0	N-Term(Dimethyl)	1716.95	1.02906	1.0074	1.02769	0	0
SPDVGLYGVIPECGETYHSDLAEAK	P46940	N-Term(Dimethyl); C13(Carbamidomethyl); K25(Dimethyl)	2763.31	1.70496	1.10069	1.55839	0	0
WKPPMIDNPSYQGIWKPR	P27824	N-Term(Dimethyl); K2(Dimethyl); K16(Dimethyl)	2297.22				0	0
GDADQASNILASFGLSAR	P43243	N-Term(Dimethyl)	1820.91	1.14088	1.08286	1.05997	0	0
ALIERPSQNNIGIQTMECSLR	A6NNK5	N-Term(Dimethyl); C18(Carbamidomethyl)	2458.24	1.11488	1.19606	0.937786	0	0
FVDHVFDEQVIDSLTVK	P04843	N-Term(Dimethyl); K17(Dimethyl)	2047.06	1.09289	1.17018	0.939619	0	0
SIEDFAHSSFQMALSK	O75874	N-Term(Dimethyl); K16(Dimethyl)	1853.91	1.24317	1.49799	0.834928	0	0
YGPQYGHPPPPPPPPEYGPHADSPVLMVYGLDQSK	P14866	N-Term(Dimethyl); K35(Dimethyl)	3840.87				0	0
SEGGLGGNWYAMDNSGEHVTWR	P11717	N-Term(Dimethyl)	2451.07				0	0
GVNWAAFHPTMPLIVSGADDR	P53621	N-Term(Dimethyl)	2282.13	1.14537	1.00923	1.14178	0	0
QEKPAEKPAETPVATSPTATDSTSGDSSR	P54727	N-Term(Dimethyl); K3(Dimethyl); K7(Dimethyl)	3029.49	0.946522	0.960803	0.991115	0	0
ADSPSIDYAELLQHFEK	Q08AM6	N-Term(Dimethyl); K17(Dimethyl)	2019				0	0
ELQELVQYPVEHPDKFLK	P55072	N-Term(Dimethyl); K15(Dimethyl); K18(Dimethyl)	2296.25	0.791101	1.18765	0.67015	0	1
VDLNSNGFICDYELHELFK	P13797	N-Term(Dimethyl); C10(Carbamidomethyl); K19(Dimethyl)	2369.14	1.02583	1.5445	0.668212	0	0
GSFKYAWVLDKLK	P68104;Q05639	N-Term(Dimethyl); K4(Dimethyl); K11(Dimethyl); K13(Dimethyl)	1666.99				0	2
TVLELMNPEAQLPQVYPFAADLYQK	P46940	N-Term(Dimethyl); K25(Dimethyl)	2934.53	0.84515	1.01781	0.835399	0	0
DQQEAALVDMVNDGVEDLR	P09211	N-Term(Dimethyl)	2145.01	1.19784	1.22161	0.986495	0	0
LAPITSDPTEATAVGAVEASFK	P14618	N-Term(Dimethyl); K22(Dimethyl)	2231.17	0.827851	1.21855	0.683495	0	0
MASTFIGNSTAIQELFK	Q9BUF5	N-Term(Dimethyl); K17(Dimethyl)	1914	1.05133	1.28639	0.822228	0	0
SYDVPPPPMEPDHPFYSNISK	P18669	N-Term(Dimethyl); K21(Dimethyl)	2473.17	1.23202	1.57535	0.817073	0	0
SKVDEAVAVLQAHQAK	P11940	N-Term(Dimethyl); K2(Dimethyl); K16(Dimethyl)	1778.01			1.04486	0	1
LFPNSLDQTDMHGDSEYNIMFGPDICGPGTKK	P27797	N-Term(Dimethyl); C26(Carbamidomethyl); K31(Dimethyl); K32(Dimethyl)	3668.7	1.61218	1.56153	1.0387	0	1
HYFQNTQGLIFVVDSNDRER	P84085;P61204;P18085	N-Term(Dimethyl)	2466.21				0	1
QSGQTDPLQKEELQSGVDAANSAAQQYQR	P46940	N-Term(Dimethyl); K10(Dimethyl)	3203.54	0.885364	0.922358	0.965717	0	1
TKPSTVEVLESIDKEIQALEEFREK	Q9C0E8	N-Term(Dimethyl); K2(Dimethyl); K14(Dimethyl); K25(Dimethyl)	3030.65	1.54386	1.78241	0.871423	0	2
IVITGDGDIDHDQALAQAIR	O43491	N-Term(Dimethyl)	2149.12	0.912321	1.34687	0.681472	0	0
GTWESHPETTELVVLQGR	P36915	N-Term(Dimethyl)	2067.05	1.59646	1.1742	1.36787	0	0
TEDPDLPAFYFDPLINPISHR	Q6P2Q9	N-Term(Dimethyl)	2485.23	1.07449	0.925291	1.1683	0	0
WEDTVEKDQELAQESPPGMAGVENEDEAELNLR	P48681	N-Term(Dimethyl); K7(Dimethyl)	3784.72	0.717045	0.414302	1.74123	0	1
SISHYHETLGEALQGVELEFSGLDIK	Q9HD45	N-Term(Dimethyl); K26(Dimethyl)	2928.49	1.28385	1.23848	1.04292	0	0
TNCNVAVINVGAPAAGMNAAVR	Q01813	N-Term(Dimethyl); C3(Carbamidomethyl)	2198.11				0	0
AKFYPEDVSEELIQDITQR	P26038	N-Term(Dimethyl); K2(Dimethyl)	2337.19	1.06236	0.98693	1.08296	0	1
ETSGNLEQLLLAVVK	P08758	N-Term(Dimethyl); K15(Dimethyl)	1669.97				0	0
AGKYEQAIQCYTEAISLCPTEK	O94826	N-Term(Dimethyl); K3(Dimethyl); C10(Carbamidomethyl); C18(Carbamidomethyl); K22(Dimethyl)	2644.28	0.606382	0.672737	0.906837	0	1
SGSHTVAVMNVGAPAAGMNAAVR	P08237	N-Term(Dimethyl)	2196.09	1.10624			0	0
QKGADFLVTEVENGGSLGSKK	P14618	N-Term(Dimethyl); K2(Dimethyl); K20(Dimethyl); K21(Dimethyl)	2276.24	0.790966	1.48765	0.534914	0	2
ISALQSAGVVVSMSPAQLGTTIYK	P53597	N-Term(Dimethyl); K24(Dimethyl)	2477.35	4.07052	1.04506	3.91865	0	0
MIINEELMASLDQPTQTVVMHR	Q99613	N-Term(Dimethyl)	2584.28				0	0
QATTIIADNIIFLSDQTK	Q04837	N-Term(Dimethyl); K18(Dimethyl)	2048.13				0	0
ALLLVGDVAQAADVAIEHR	Q9H269	N-Term(Dimethyl)	1989.11	1.26799	1.01318	1.25908	0	0
VDHQTGPIVWGEPGTNGQHAFYQLIHQGTK	P06744	N-Term(Dimethyl); K30(Dimethyl)	3371.68	1.34321	3.16519	0.426946	0	0
LDAENAIVHMGGQWLGGR	Q01085	N-Term(Dimethyl)	1951.98	1.09441	1.14421	0.962273	0	0
IYLTADNLVLNLQDESFTR	J3KPX7	N-Term(Dimethyl)	2253.15	2.25216	1.57753	1.43632	0	0
HILGFDTGDAVLNEAAQILR	Q9Y224	N-Term(Dimethyl)	2181.16	1.261	1.15118	1.10205	0	0
LLQDHPWLLSQNLVVKPDQLIK	P53396	N-Term(Dimethyl); K16(Dimethyl); K22(Dimethyl)	2681.57	0.794285	0.896921	0.890942	0	0
NYGSYSTQASAAAATAELLK	O14828	N-Term(Dimethyl); K20(Dimethyl)	2073.05	1.43126	1.66619	0.864213	0	0
GQFSTDELVAEVEKR	Q00610	N-Term(Dimethyl); K14(Dimethyl)	1763.91	0.944973	0.968356	1.13217	0	1
QTTGDEVLIIQDKLEAIK	E9PHM6;Q03001	N-Term(Dimethyl); K13(Dimethyl); K18(Dimethyl)	2098.2				0	1
AENGKLVINGNPITIFQER	P04406	N-Term(Dimethyl); N3(Deamidated); K5(Dimethyl)	2170.18	1.26471	1.58663	0.801939	0	1
TVTAMDVVYALKR	P62805	N-Term(Dimethyl); K12(Dimethyl)	1522.86	1.04136	3.5806	0.292599	0	1
LLDFGSLSNLQVTQPTVGMNFK	P0CW22	N-Term(Dimethyl); K22(Dimethyl)	2465.3	0.986889	1.02367	0.969917	0	0
LVAFCPFASSQVALENANAVSEGVVHEDLR	O00567	N-Term(Dimethyl); C5(Carbamidomethyl); Q11(Deamidated); N18(Deamidated)	3259.63	1.10944	1.16134	0.96111	0	0
YYQHLYSIHLAEQPEDCTMQLADHIK	E7EX90	N-Term(Dimethyl); C17(Carbamidomethyl); K26(Dimethyl)	3259.54	1.13252	1.29015	0.883151	0	0
ALTLQDLDNIWAAQAGK	Q93008	N-Term(Dimethyl); K17(Dimethyl)	1884.02	0.830818	1.03028	0.811296	0	0
LDLWNLNNDTEVPTASISVEGNPALNR	Q13409	N-Term(Dimethyl)	2980.5				0	0
GGNVGINSFGFGGSNVHIILRPNTQPPPAPAPHATLPR	P49327	N-Term(Dimethyl); N7(Deamidated); N15(Deamidated); N23(Deamidated)	3889.05	0.542822	0.45448	1.20163	0	0
SGEHDFGAAFDGDGDRNMILGK	P36871	N-Term(Dimethyl); K22(Dimethyl)	2365.08	1.59754	2.10439	0.763754	0	1
WSGPLSLQEVDEQPQHPLHVTYAGAAVDELGK	P30086	N-Term(Dimethyl); Q13(Deamidated); Q15(Deamidated); K32(Dimethyl)	3529.78				0	0
ELHSEFSEVMNEIWASDQIR	P40939	N-Term(Dimethyl)	2448.14	1.304	0.990304	1.32476	0	0
SGAHSFISGLPQGYDTEVDEAGSQLSGGQR	Q03518	N-Term(Dimethyl)	3078.43				0	0
VHVSEEGTEPEAMLQVLGPKPALPAGTEDTAK	A0A0A0MS51;Q5T0I0	N-Term(Dimethyl); K20(Dimethyl); K32(Dimethyl)	3385.75				0	0
VGSHITGGDIYGIVSENSLIK	P38606	N-Term(Dimethyl); K21(Dimethyl)	2215.19	0.972756	1.14884	0.851865	0	0
ALECFCQAASEVGKEEFLDR	Q12769	N-Term(Dimethyl); C4(Carbamidomethyl); C6(Carbamidomethyl); K14(Dimethyl)	2415.13			1.20428	0	1
SKDPNSQVGACIVNSENK	P32321	N-Term(Dimethyl); K2(Dimethyl); C11(Carbamidomethyl); K18(Dimethyl)	2031.01	1.06836	1.26516	0.849574	0	1
VIISAPSADAPMFVMGVNHEKYDNSLK	P04406	N-Term(Dimethyl); N18(Deamidated); K21(Dimethyl); K27(Dimethyl)	3018.51	1.06831	1.32698	0.996518	0	1
EEEEFNTGPLSVLTQSVK	P62316	N-Term(Dimethyl); K18(Dimethyl)	2063.05				0	0
AVTDSINQLITMCTQQAPGQK	Q9Y490	N-Term(Dimethyl); C13(Carbamidomethyl); K21(Dimethyl)	2360.19	0.801885	0.904673	0.89176	0	0
ALVDHENVISCPHLGASTK	O43175	N-Term(Dimethyl); C11(Carbamidomethyl); K19(Dimethyl)	2104.09				0	0
GCHESCLDEEVEGQGFCSGPGWDPVTGWGTPNFPALLK	O14773	N-Term(Dimethyl); C2(Carbamidomethyl); C6(Carbamidomethyl); C17(Carbamidomethyl); K38(Dimethyl)	4246.89	1.55896	2.74772	0.570809	0	0
YTLPLYHAMMGGSEVAQTLAK	Q9H4A4	N-Term(Dimethyl); K21(Dimethyl)	2337.19				0	0
SLDGIPFTVDAGGLIHCIEDFHKK	Q93052	N-Term(Dimethyl); C17(Carbamidomethyl); K23(Dimethyl); K24(Dimethyl)	2753.43				0	1
GATDIDKNGYPDLIVGAFGVDR	P06756	N-Term(Dimethyl); K7(Dimethyl); N8(Deamidated)	2350.2	0.756739	0.604669	1.25909	0	1
AGGSASAMLQPLLDNQVGFK	P20618	N-Term(Dimethyl); K20(Dimethyl)	2060.08				0	0
LLSRPQDALEGVVLSPSLEAR	Q9NVI7;H0Y2W2	N-Term(Dimethyl)	2278.28				0	0
CLVGEFVSDALLVPDK	P05067	N-Term(Dimethyl); C1(Carbamidomethyl); K16(Dimethyl)	1817.97	0.577208	0.408278	1.42234	0	0
TLGLYGKDQQEAALVDMVNDGVEDLR	P09211	N-Term(Dimethyl); K7(Dimethyl)	2905.45				0	1
SHQELISQLLQSYMK	Q9Y2H2	N-Term(Dimethyl); K15(Dimethyl)	1860.98	0.725256	0.647803	1.12636	0	0
FTFYDGPPFATGLPHYGHILAGTIK	P41252	N-Term(Dimethyl); K25(Dimethyl)	2776.45	1.12802			0	0
ALDLFSDNAPPPELLEIINEDIAKR	Q15084	N-Term(Dimethyl); K24(Dimethyl)	2849.52	0.93793	1.24905	0.755471	0	1
IGEHTPSALAIMENANVLAR	P04075	N-Term(Dimethyl)	2135.12	0.801848			0	0
YKVEYPIMYSTDPENGHIFNCIQR	O14880	N-Term(Dimethyl); K2(Dimethyl); C21(Carbamidomethyl)	3030.44	0.615309	0.652739	0.948379	0	1
EIGWTDVGGWTGQGGSILGTK	Q01813	N-Term(Dimethyl); K21(Dimethyl)	2175.1				0	0
GIGIENIHYLNDGLWHMK	Q9ULC4	N-Term(Dimethyl); K18(Dimethyl)	2166.11	1.08259	1.23054	0.88511	0	0
QNADISAMQDTINKLENELR	P07196	N-Term(Dimethyl); K14(Dimethyl)	2359.19				0	1
SKAELMEISEDKTK	P05455	N-Term(Dimethyl); K2(Dimethyl); K12(Dimethyl); K14(Dimethyl)	1720.93				0	2
GFAFVTFDDHDSVDKIVIQK	F8W6I7	N-Term(Dimethyl); K15(Dimethyl); K20(Dimethyl)	2365.24	0.708471	0.840216	0.848319	0	1
QTIGNSCGTIGLIHAVANNQDK	P09936	N-Term(Dimethyl); N5(Deamidated); C7(Carbamidomethyl); K22(Dimethyl)	2368.19	1.07133	1.24066	0.868756	0	0
QLSQSLLPAIVELAEDAK	P30153	N-Term(Dimethyl); K18(Dimethyl)	1981.12	0.999878	1.14332	0.87985	0	0
ALGQAASDNSGPEDAKR	Q15155	N-Term(Dimethyl); K16(Dimethyl)	1742.86	0.968911	0.855568	1.13935	0	1
LKDLNSQADSLMTSSAFDTSQVK	Q13813	N-Term(Dimethyl); K2(Dimethyl); K23(Dimethyl)	2570.3	0.784048	0.368482	2.14069	0	1
RGQTCVVHYTGMLEDGKK	Q5W0X3	N-Term(Dimethyl); C5(Carbamidomethyl); K17(Dimethyl); K18(Dimethyl)	2163.1	1.04376	1.25699	0.835401	0	2
HATALEELSEQLEQAKR	P35580	N-Term(Dimethyl); K16(Dimethyl)	2009.06	1.24796	1.52703	0.822204	0	1
AFVHWYVGEGMEEGEFSEAREDMAALEK	P68363;Q9BQE3	N-Term(Dimethyl); K28(Dimethyl)	3273.48				0	1
VEESGEHVILGTGELYLDCVMHDLRK	Q15029	N-Term(Dimethyl); C19(Carbamidomethyl); K26(Dimethyl)	3055.52				0	1
EYQPHVIVSTTGPNPFTTLTDR	E7EV99	N-Term(Dimethyl)	2501.27				0	0
LLGGQIGLEDFIFAHVK	O14908	N-Term(Dimethyl); K17(Dimethyl)	1913.08				0	0
LQQSHPLSATQIQVK	Q13813	N-Term(Dimethyl); K15(Dimethyl)	1733.99	1.03738	1.43444	0.727584	0	0
AVVHGILMGVPVPFPIPEPDGCK	G3V2V8	N-Term(Dimethyl); C22(Carbamidomethyl); K23(Dimethyl)	2485.32	0.879536	1.47024	0.601858	0	0
ALEHFTDLYDIKR	Q00610	N-Term(Dimethyl); K12(Dimethyl)	1676.9	1.19109	1.23271	0.972102	0	1
DFSALESQLQDTQELLQEENR	P35579	N-Term(Dimethyl)	2521.2	1.13023	0.897923	1.26635	0	0
IWNVHSVLNVLHSLVDK	Q9Y262	N-Term(Dimethyl); K17(Dimethyl)	2029.15	0.568973	0.700103	0.817631	0	0
LLLAGYDDFNCNIWDAMK	P62879	N-Term(Dimethyl); C11(Carbamidomethyl); K18(Dimethyl)	2215.05				0	0
AADLNGDLTATREEFTAFLHPEEFEHMK	Q15293	N-Term(Dimethyl); K28(Dimethyl)	3275.55	0.790018	0.850848	0.934142	0	1
ADCTITMADSDFLALMTGK	P22307	N-Term(Dimethyl); C3(Carbamidomethyl); K19(Dimethyl)	2116.99				0	0
IGTIYEGASNIQLNTIAK	P45954	N-Term(Dimethyl); K18(Dimethyl)	1962.09	0.950799	0.794229	1.2044	0	0
GAGTVFDAFPDQVAIQLNDTHPALAIPELMR	P06737	N-Term(Dimethyl); Q16(Deamidated)	3336.72				0	0
EMIPFAVVGSDHEYQVNGK	Q9UHD8	N-Term(Dimethyl); K19(Dimethyl)	2176.07	0.846437	0.879963	0.967739	0	0
DELHIVEAEAMNYEGSPIK	P06748	N-Term(Dimethyl); K19(Dimethyl)	2201.07	0.972565	0.90029	1.08684	0	0
SDAEEDGGTVSQEEEDRKPK	P27824	N-Term(Dimethyl); K18(Dimethyl); K20(Dimethyl)	2290.06	1.07321	0.923839	1.16873	0	1
SYSSSSGSLMPSLENLDLSQVAAISNDLK	P07196	N-Term(Dimethyl); K29(Dimethyl)	3069.53				0	0
SPVGSGAPQAAAPAPAAHVAGNPGGDAAPAATGTAAAASLATAAGSEDAEKK	P16989	N-Term(Dimethyl); K51(Dimethyl); K52(Dimethyl)	4591.29	0.765551	0.697319	1.10451	0	1
RGFEVVYMTEPIDEYCVQQLK	P08238	N-Term(Dimethyl); C16(Carbamidomethyl); K21(Dimethyl)	2660.3	1.08674	1.069	1.02277	0	1
TGVHHYSGNNIELGTACGK	P62888	N-Term(Dimethyl); N9(Deamidated); C17(Carbamidomethyl); K19(Dimethyl)	2071.99	0.844184	0.651749	1.30312	0	0
MQEVVANLQYDDGSGMKR	Q16531	N-Term(Dimethyl); K17(Dimethyl)	2097.01	1.00483	0.980624	1.0309	0	1
TQLEELEDELQATEDAK	P35579;P35580	N-Term(Dimethyl); K17(Dimethyl)	2017.98				0	0
SLSNVIAHEISHSWTGNLVTNK	P09960	N-Term(Dimethyl); N4(Deamidated); K22(Dimethyl)	2464.29				0	0
LSYLEEAVMHLDHSDPITR	Q6P2E9	N-Term(Dimethyl)	2254.11	1.08613	0.965739	1.13149	0	0
LILPVGPAGGNQMLEQYDKLQDGSIK	P22061	N-Term(Dimethyl); K19(Dimethyl); K26(Dimethyl)	2868.55	1.04889	1.07579	0.980919	0	1
TSVQFQNFSPTVVHPGDLQTQLAVQTK	O95782	N-Term(Dimethyl); K27(Dimethyl)	3026.6				0	0
IMQVNGWDMTMVTHDQAR	O14907	N-Term(Dimethyl)	2161	1.13131	1.13679	1.00122	0	0
GNFGGSFAGSFGGAGGHAPGVAR	P52272	N-Term(Dimethyl)	2062.98	1.01586	0.9235	1.10669	0	0
EGGQYGLVAACAAGGQGHAMIVEAYPK	P55084	N-Term(Dimethyl); C11(Carbamidomethyl); K27(Dimethyl)	2761.34				0	0
YYSSEYHYVGGFYGGCNEALMK	P53634	N-Term(Dimethyl); C16(Carbamidomethyl); K22(Dimethyl)	2651.15	1.39642	2.14006	0.656474	0	0
ELPLGPADAMELADHLVK	Q8N201	N-Term(Dimethyl); K18(Dimethyl)	1975.05	0.713225	0.882108	0.813453	0	0
ICANHYITPMMELKPNAGSDR	P43487	N-Term(Dimethyl); C2(Carbamidomethyl); K14(Dimethyl)	2474.19	1.16208	1.52873	0.764776	0	0
FQYCVAVGAQTFPSVSAPSKK	P55265	N-Term(Dimethyl); C4(Carbamidomethyl); K20(Dimethyl); K21(Dimethyl)	2356.23	1.83996	1.22063	1.51654	0	1
NNQFQALLQYADPVSAQHAK	A6NLN1	N-Term(Dimethyl); Q5(Deamidated); K20(Dimethyl)	2300.18				0	0
ETTDTDTADQVIASFK	O43707	N-Term(Dimethyl); K16(Dimethyl)	1797.87	0.640065	0.890913	0.63043	0	0
ISTEVGITNVDLSTVDKDQSIAPK	P04844	N-Term(Dimethyl); K17(Dimethyl); K24(Dimethyl)	2614.41	1.0707	1.04623	1.0296	0	1
VDHQTGPIVWGEPGTNGQHAFYQLIHQGTK	P06744	N-Term(Dimethyl); N16(Deamidated); K30(Dimethyl)	3372.67	1.36562	2.90179	0.473468	0	0
GGQIGLQAPGLSVSGPQGHLESGSGK	Q09666	N-Term(Dimethyl); K26(Dimethyl)	2474.29	0.706142	0.624297	1.13796	0	0
CQNEQLQTAVTQQVSQIQQHK	O60763	N-Term(Dimethyl); C1(Carbamidomethyl); K21(Dimethyl)	2552.27	0.881417	1.01299	0.875392	0	0
EDYTGKDVLILGGGDGGILCEIVK	P52788	N-Term(Dimethyl); K6(Dimethyl); C20(Carbamidomethyl); K24(Dimethyl)	2605.38	0.73886	1.2075	0.615608	0	1
RSYDVPPPPMEPDHPFYSNISK	P18669	N-Term(Dimethyl); K22(Dimethyl)	2629.27			0.12622	0	1
QLAPGMVQQMQSVCSDCNGEGEVINEKDR	O60884	N-Term(Dimethyl); C14(Carbamidomethyl); C17(Carbamidomethyl); K27(Dimethyl)	3335.51	0.991398	0.784432	1.27151	0	1
YAICSALAASALPALVMSK	P36578	N-Term(Dimethyl); C4(Carbamidomethyl); K19(Dimethyl)	1993.08	0.923564	0.911492	1.01939	0	0
YLQEVIDVLETDGHFR	Q02818	N-Term(Dimethyl)	1961.99	1.84169	1.91676	0.966668	0	0
HGEVCPAGWKPGSDTIKPDVQK	Q06830	N-Term(Dimethyl); C5(Carbamidomethyl); K10(Dimethyl); K17(Dimethyl); K22(Dimethyl)	2518.31	1.05263	1.22207	0.866576	0	0
GTVVYGEPITASLGTDGSHYWSK	Q16555	N-Term(Dimethyl); K23(Dimethyl)	2481.22	1.32591	1.66306	0.802109	0	0
DAASLESQLQDTQELLQEETR	P35580	N-Term(Dimethyl)	2432.17	1.26612	1.27975	0.995356	0	0
VLNNMEIGTSLFDEEGAK	P00558	N-Term(Dimethyl); K18(Dimethyl)	2023				0	0
YMNSGPVVAMVWEGLNVVK	Q32Q12;O60361	N-Term(Dimethyl); K19(Dimethyl)	2149.11				0	0
VIISAPSADAPMFVMGVNHEKYDNSLK	P04406	N-Term(Dimethyl); K21(Dimethyl); K27(Dimethyl)	3017.53	1.27734	1.67813	0.827588	0	1
AFREEFGAEPELAVSAPGR	P51570	N-Term(Dimethyl)	2061.04	1.23438	1.47899	0.821465	0	1
GSTAPVGGGAFPTIVER	Q15084	N-Term(Dimethyl)	1643.87	1.00718	1.31972	0.767814	0	0
CEFQDAYVLLSEKK	P10809	N-Term(Dimethyl); C1(Carbamidomethyl); K13(Dimethyl); K14(Dimethyl)	1813.93	0.641247	0.628906	1.02581	0	1
TSRPENAIIYNNNEDFQVGQAK	P29401	N-Term(Dimethyl); K22(Dimethyl)	2564.26	0.980267	1.1501	0.855948	0	0
GLGTDEDTIIDIITHR	P08133	N-Term(Dimethyl)	1796.93	1.31828	1.71393	0.773827	0	0
AEISCTDNQDGTCSVSYLPVLPGDYSILVK	P21333	N-Term(Dimethyl); C5(Carbamidomethyl); C13(Carbamidomethyl); K30(Dimethyl)	3357.61				0	0
GALQAVDQLSLFRPLCK	A1L0T0	N-Term(Dimethyl); C16(Carbamidomethyl); K17(Dimethyl)	1972.1				0	0
IMQSSSEVGYDAMAGDFVNMVEK	P10809	N-Term(Dimethyl); K23(Dimethyl)	2564.16	0.767154	0.68001	1.135	0	0
ILAIGLINEALDEGDAQK	P46940	N-Term(Dimethyl); K18(Dimethyl)	1939.07	1.11745	1.1086	1.0141	0	0
HKDVAEEIANYRPTLDTLHEQASALPQEHAESPDVR	Q01082	N-Term(Dimethyl); K2(Dimethyl)	4123.04	1.08613	1.39278	0.784561	0	1
GIVDQSQQAYQEAFEISKK	P63104	N-Term(Dimethyl); K18(Dimethyl); K19(Dimethyl)	2253.17				0	1
GIFPVLCKDPVQEAWAEDVDLR	P14618;H3BR70	N-Term(Dimethyl); C7(Carbamidomethyl); K8(Dimethyl)	2613.33				0	1
GSLESPATDVFGSTEEGEKR	O00232	N-Term(Dimethyl); K19(Dimethyl)	2152.03				0	1
TVVSGSCAAHSLLITTEGK	Q9P258	N-Term(Dimethyl); C7(Carbamidomethyl); K19(Dimethyl)	1987.05				0	0
HLYTLDGGDIINALCFSPNR	P63244	N-Term(Dimethyl); C15(Carbamidomethyl)	2304.13	1.19732	1.15929	1.03907	0	0
GAVTGHEECVDALLQHGAK	O15084	N-Term(Dimethyl); C9(Carbamidomethyl); K19(Dimethyl)	2048.02	0.859573	0.762789	1.13372	0	0
FNFLAPELPAVSEFSTSETMGHSADR	P55084	N-Term(Dimethyl)	2868.34	0.978757	0.856214	1.15006	0	0
ELLELEALSMAVESTGTAK	Q14764	N-Term(Dimethyl); K19(Dimethyl)	2048.08				0	0
LLQAQLQAQKEELQSLMHQPK	Q96AQ6	N-Term(Dimethyl); K10(Dimethyl); K21(Dimethyl)	2545.41	1.27646	1.59492	0.805182	0	1
EALGHWLGLLNADGWIGR	Q13724	N-Term(Dimethyl)	2006.05	1.54544	1.66061	0.936289	0	0
AIIAPHAGYTYCGSCAAHAYK	Q9Y316	N-Term(Dimethyl); C12(Carbamidomethyl); C15(Carbamidomethyl); K21(Dimethyl)	2338.1	0.968759	1.39316	0.699587	0	0
SQPAFMQSSLSQPSVVLSGTAIHNFPTVQHQELAK	E7EPN9	N-Term(Dimethyl); Q12(Deamidated); K35(Dimethyl)	3821.96	0.823541	0.905987	0.914516	0	0
FSGWYDADLSPAGHEEAKR	P18669	N-Term(Dimethyl); K18(Dimethyl)	2192.03	1.0259	1.32331	0.942955	0	1
HTGPGILSMANAGPNTNGSQFFICTAK	P62937	N-Term(Dimethyl); M9(Oxidation); C24(Carbamidomethyl); K27(Dimethyl)	2863.38		0.272292		0	0
GVMLAVDAVIAELKK	P10809	N-Term(Dimethyl); K14(Dimethyl); K15(Dimethyl)	1641				0	1
IVSWSQVGVEPSIMGIGPIPAIK	Q9BWD1	N-Term(Dimethyl); K23(Dimethyl)	2434.37				0	0
MAAISESNINLCGSHCGVSIGEDGPSQMALEDLAMFR	P29401	N-Term(Dimethyl); N10(Deamidated); C12(Carbamidomethyl); C16(Carbamidomethyl)	3996.79				0	0
LEVGIQAMEHLIHVLQTDR	O60763	N-Term(Dimethyl)	2230.19	1.25914	1.21049	1.0465	0	0
TMLELLNQLDGFQPNTQVK	R4GNH3	N-Term(Dimethyl); K19(Dimethyl)	2245.19	1.32606	1.05947	1.25922	0	0
MDKEETKDWILPSDYDHAEAEAR	O43852	N-Term(Dimethyl); K3(Dimethyl); K7(Dimethyl)	2833.33	0.959449	1.05134	0.733351	0	2
SFCSMAGPNLIAIGSSESAQK	O94760	N-Term(Dimethyl); C3(Carbamidomethyl); K21(Dimethyl)	2211.08	1.10006	1.2679	0.872888	0	0
SQETECTYFSTPLLLGK	P40926	N-Term(Dimethyl); C6(Carbamidomethyl); K17(Dimethyl)	2030.01	0.844762	0.892407	0.952355	0	0
HLEIFHTEFQNLLDADKNEDLGR	A0A0C4DGX4	N-Term(Dimethyl); K17(Dimethyl)	2810.4				0	1
TFYGLHQDFPSVVLVGLGK	P28838	N-Term(Dimethyl); K19(Dimethyl)	2133.16	1.82574	1.81435	1.01239	0	0
IINEPTAAAIAYGLDKR	P11021	N-Term(Dimethyl); K16(Dimethyl)	1872.06	1.35752	2.12327	0.64323	0	1
FVPFAAVAAANCINIPLMR	A0A0A0MS41;Q9H9B4	N-Term(Dimethyl); C12(Carbamidomethyl)	2103.12				0	0
YHTSQSGDEMTSLSEYVSR	P08238	N-Term(Dimethyl)	2204.97	1.1002	1.00145	1.13186	0	0
EIVHIQAGQCGNQIGAK	Q9BVA1;Q13885;P07437;Q13509;P68371;P04350	N-Term(Dimethyl); C10(Carbamidomethyl); K17(Dimethyl)	1878.98				0	0
WAHLDIAGVMTNKDEVPYLR	P28838	N-Term(Dimethyl); K13(Dimethyl)	2384.24	1.54417	1.8153	0.855802	0	1
IKGGADVSGGVSAPDISLGEGHLSVK	Q09666	N-Term(Dimethyl); K2(Dimethyl); K26(Dimethyl)	2534.37	0.619247	0.508843	1.22436	0	1
LTPRPTAAELEEVLQVNSLIQTQK	Q9BSJ8	N-Term(Dimethyl); K24(Dimethyl)	2734.52	1.1763	1.18873	0.995555	0	0
QFIDSNPNQPLVILEMESGASAK	P49588	N-Term(Dimethyl); K23(Dimethyl)	2544.3	1.52439	1.20675	1.27088	0	0
VGEVCHITCKPEYAYGSAGSPPK	Q02790	N-Term(Dimethyl); C5(Carbamidomethyl); C9(Carbamidomethyl); K10(Dimethyl); K23(Dimethyl)	2591.26				0	0
EQWLNNMQIPEKLEDLEVIQHR	Q01082	N-Term(Dimethyl); K12(Dimethyl)	2818.46	1.11187	1.17315	0.953512	0	1
EAQTSFLHLGYLPNQLFR	A0A087X2G1	N-Term(Dimethyl)	2162.13				0	0
DTMSDQALEALSASLGTR	E9PCH5;E7ES10;F8W7E0	N-Term(Dimethyl)	1893.92				0	0
YQEAAPNVANNTGPHAASCFGAK	C9JZR2	N-Term(Dimethyl); C19(Carbamidomethyl); K23(Dimethyl)	2431.14				0	0
IINEPTAAAIAYGLDKK	P11142;P54652	N-Term(Dimethyl); K16(Dimethyl); K17(Dimethyl)	1872.08				0	1
GAVLPHFNVLFDGLSK	Q08AM6	N-Term(Dimethyl); K16(Dimethyl)	1769.99	0.832056	1.03825	0.806263	0	0
FVCMLVTEDNVFEAPTIVK	Q13740	N-Term(Dimethyl); C3(Carbamidomethyl); K19(Dimethyl)	2268.16				0	0
EAESCDCLQGFQLTHSLGGGTGSGMGTLLISK	P07437;P68371;P04350	N-Term(Dimethyl); C5(Carbamidomethyl); C7(Carbamidomethyl); Q9(Deamidated); Q12(Deamidated); K32(Dimethyl)	3369.6				0	0
YFNVHELEALLQEMSSK	Q5JRA6	N-Term(Dimethyl); K17(Dimethyl)	2094.06	1.06365	1.09013	0.981633	0	0
ASTSLKPPTADLFTGVLPNGYNPPR	O00754	N-Term(Dimethyl); K6(Dimethyl)	2669.42		2.67654		0	0
AVAFQNPQTHVIENLHAAAYR	P22695	N-Term(Dimethyl)	2378.23	1.04324	0.812123	1.29238	0	0
EAPAEGEAAEPGSPTAAEGEAASAASSTSSPK	A0A087WZH7	N-Term(Dimethyl); K32(Dimethyl)	2971.35			4.12262	0	0
GLTMLDHEQVTPEDPGAQFLIR	Q9UBE0	N-Term(Dimethyl)	2495.25	1.0337	1.23292	0.843508	0	0
NHNSLLSLPQEPYSFSEPAQQAMR	P10253	N-Term(Dimethyl)	2772.34	1.64501	2.00688	0.82466	0	0
AATGEEVSAEDLGGADLHCR	Q9HCC0	N-Term(Dimethyl); C19(Carbamidomethyl)	2085.94				0	0
GIAFPTSISVNNCVCHFSPLK	Q9UQ80	N-Term(Dimethyl); C13(Carbamidomethyl); C15(Carbamidomethyl); K21(Dimethyl)	2404.21	0.915666	1.03258	0.89216	0	0
GFESPSDNSSAMLLQWHEK	O15511	N-Term(Dimethyl); K19(Dimethyl)	2219.03	1.13993	1.18341	0.969104	0	0
LLLAGYDDFNCNVWDALK	P62873	N-Term(Dimethyl); C11(Carbamidomethyl); K18(Dimethyl)	2183.08				0	0
EAATQAQQTLGSTIDK	P47897	N-Term(Dimethyl); K16(Dimethyl)	1717.9	0.807079	0.775022	1.04768	0	0
MLPVDEFLPVMFDKHPVSEYK	Q8NBJ5	N-Term(Dimethyl); K14(Dimethyl); K21(Dimethyl)	2605.34	1.10259	1.08098	1.02618	0	1
ATVAPEDVSEVIFGHVLAAGCGQNPVR	Q9BWD1	N-Term(Dimethyl); C21(Carbamidomethyl)	2821.42				0	0
GFFDPNTHENLTYLQLLER	P58107;Q15149	N-Term(Dimethyl)	2335.17				0	0
GFFDPNTHENLTYLQLLQR	P58107	N-Term(Dimethyl); Q18(Deamidated)	2335.17				0	0
TGEMSGPVFTDSGIHIILR	Q13526	N-Term(Dimethyl)	2058.06	1.02153	1.19683	0.858714	0	0
EAHSDENPSEGDGAVNKEEK	E9PMR6	N-Term(Dimethyl); K17(Dimethyl); K20(Dimethyl)	2226	0.854689	0.84175	1.02153	0	1
ANKEFGDSLSLEILQIIK	Q9UHB9	N-Term(Dimethyl); K3(Dimethyl); K18(Dimethyl)	2102.21	1.15197			0	1
LKDPANFQYPAESVLAYK	B4DLR8	N-Term(Dimethyl); K2(Dimethyl); K18(Dimethyl)	2138.15				0	1
HKELAPYDENWFYTR	P39019	N-Term(Dimethyl); K2(Dimethyl)	2024.98	1.07703	1.00644	1.01513	0	1
AAFDDAIAELDTLSEESYK	P62258	N-Term(Dimethyl); K19(Dimethyl)	2144.02	0.934126	0.946749	0.992655	0	0
GVEITGFPEAQALGLEVFHAGTALK	P22102	N-Term(Dimethyl); K25(Dimethyl)	2611.4				0	0
AVSSAIAQLLGEVAQGNENYAGIAAR	Q9Y490	N-Term(Dimethyl); Q15(Deamidated)	2602.36				0	0
ISVAGVTSSNVGYLAHAIHQVTK	P00505	N-Term(Dimethyl); N10(Deamidated); K23(Dimethyl)	2409.32				0	0
AFTHTAQYDEAISDYFR	P31939	N-Term(Dimethyl)	2062.94	1.12005	1.22117	0.922762	0	0
NADMSEEMQQDSVECATQALEK	P63167	N-Term(Dimethyl); C15(Carbamidomethyl); K22(Dimethyl)	2570.1	1.17177	1.11615	1.07626	0	0
TKIDCDNLEQYFIQQGGGPDKK	A0A087X2G1	N-Term(Dimethyl); K2(Dimethyl); C5(Carbamidomethyl); K21(Dimethyl); K22(Dimethyl)	2666.34	1.01259	1.02711	0.991852	0	2
ELDALDANDELTPLGR	Q08211	N-Term(Dimethyl)	1769.89	1.07609	0.909601	1.19021	0	0
QLFHGTPVTIENFLNWK	E5RGQ3	N-Term(Dimethyl); K17(Dimethyl)	2100.12	1.27732	1.00666	1.27658	0	0
FKPAYNPYTEPSMEVFSYHQGLK	Q9Y285	N-Term(Dimethyl); K2(Dimethyl); K23(Dimethyl)	2817.39			0.691004	0	0
QAHILLDCGEDNVCKPK	P06756	N-Term(Dimethyl); C8(Carbamidomethyl); C14(Carbamidomethyl); K15(Dimethyl); K17(Dimethyl)	2081.05	0.711415	0.641544	1.11564	0	0
SLYYYIQQDTKGDYQK	P07355	N-Term(Dimethyl); K11(Dimethyl); K16(Dimethyl)	2097.05	0.65951	0.549784	1.20686	0	1
SSLSSAQADFNQLAELDR	Q13813	N-Term(Dimethyl)	1979.96				0	0
LTDLASQMAEMQLAELR	Q9NUQ6	N-Term(Dimethyl)	1947.98				0	0
IANDNSLNHEYLPILGLAEFR	P17174	N-Term(Dimethyl)	2427.26	1.07916	1.23272	0.880744	0	0
EKEISGLWNELDSLKDAVEHQR	Q86UP2	N-Term(Dimethyl); K2(Dimethyl); K15(Dimethyl)	2680.38	0.875313	1.01534	0.867319	0	2
TFFPEYTHQLFGDDETAFGYK	O14929	N-Term(Dimethyl); K21(Dimethyl)	2569.19	2.48153			0	0
VEAVNMAEGIIHDTETKMEEFKDQLPADECNK	P38646	N-Term(Dimethyl); K17(Dimethyl); K22(Dimethyl); C30(Carbamidomethyl); K32(Dimethyl)	3803.81				0	2
EINNAHAILTDISKR		N-Term(Dimethyl)	1722.95				0	1
LEICNLTPDTLTSDTYKK	P17655	N-Term(Dimethyl); C4(Carbamidomethyl); K17(Dimethyl); K18(Dimethyl)	2196.14	0.804291	0.836559	0.967262	0	1
DGTAGSHFMASPQCVGYSR	Q9H488	N-Term(Dimethyl); C14(Carbamidomethyl)	2055.9	1.04386	1.20418	0.872122	0	0
HFIEQGINVCLCQSYAK	P00505	N-Term(Dimethyl); C10(Carbamidomethyl); C12(Carbamidomethyl); K17(Dimethyl)	2123.04	0.94592	0.759911	1.25233	0	0
IGPILDNSTLQSEVKPILEK	P30153	N-Term(Dimethyl); K15(Dimethyl); K20(Dimethyl)	2278.32	0.782523	0.933708	0.843167	0	0
QGLYELSASNFELHVAQGDHFIK	Q86UY0	N-Term(Dimethyl); K23(Dimethyl)	2659.34	0.95348	1.06558	0.872506	0	0
APKPEDIDEEDDDVPDLVENFDEASKNEAN	Q96K17	N-Term(Dimethyl); K3(Dimethyl); K26(Dimethyl)	3443.55	1.33862	1.18246	1.13893	0	1
TLNDELEIIEGMKFDR	P10809	N-Term(Dimethyl); K13(Dimethyl)	1979.01	0.847059	0.885605	0.962279	0	1
ACANPAAGSVILLENLR	P00558	N-Term(Dimethyl); C2(Carbamidomethyl)	1796.96	1.06756	1.85216	0.579881	0	0
DKAPVQPQQSPAAAPGGTDEKPSGK	Q13200	N-Term(Dimethyl); K2(Dimethyl); K21(Dimethyl); K25(Dimethyl)	2573.35	1.04165	0.928724	1.12839	0	1
DIKPDNVLLDVNGHIR	Q9Y5S2	N-Term(Dimethyl); K3(Dimethyl)	1874.03	1.25525	1.02227	1.23536	0	0
HLQTYGEHYPLDHFDK	P12694	N-Term(Dimethyl); K16(Dimethyl)	2055.99	1.11134	1.07341	1.04162	0	0
MADPQSIQESQNLSMFLANHNK	Q7L576	N-Term(Dimethyl); K22(Dimethyl)	2559.23	0.993352	1.17873	0.847843	0	0
LYIGLAGLATDVQTVAQR	P49720	N-Term(Dimethyl)	1917.07	1.05814	1.73746	0.61271	0	0
EGNASGVSLLEALDTILPPTRPTDKPLR	Q05639	N-Term(Dimethyl); K25(Dimethyl)	3016.64				0	0
VGTGEPCCDWVGDEGAGHFVK	P52209	N-Term(Dimethyl); C7(Carbamidomethyl); C8(Carbamidomethyl); K21(Dimethyl)	2333.03				0	0
LVEYDIDEVVYDEDSPYQNIK	P52788	N-Term(Dimethyl); K21(Dimethyl)	2602.23	0.86174	1.30222	0.665761	0	0
MWSIENIAFGSGGGLLQK	P43490	N-Term(Dimethyl); K18(Dimethyl)	1964.02	1.31924	1.73682	0.76418	0	0
SVAAIHPSLEIPMLIPK	O60256	N-Term(Dimethyl); K17(Dimethyl)	1872.1	1.14004	1.11595	1.02779	0	0
IAIPGLAGAGNSVLLVSNLNPER	A6NLN1	N-Term(Dimethyl); N11(Deamidated)	2304.3				0	0
TFHIFYYLLSGAGEHLK	P35579	N-Term(Dimethyl); K17(Dimethyl)	2052.09	1.33339	1.66288	0.806718	0	0
MREIVHIQAGQCGNQIGAK	Q9BVA1;Q13885;P07437;Q13509;P68371;P04350	N-Term(Dimethyl); C12(Carbamidomethyl); K19(Dimethyl)	2166.12				0	1
LMDHVGTEPSIKEDQVIQLMNAIFSK	P04844	N-Term(Dimethyl); K12(Dimethyl); K26(Dimethyl)	3027.59	1.10748	1.2227	0.911264	0	1
HTIAVVWGGVNIPHSPYR	O75369	N-Term(Dimethyl)	2031.08	1.28118	1.281	1.00621	0	0
VNIAFNYDMPEDSDTYLHR	Q13838	N-Term(Dimethyl)	2328.04	1.08373	1.16723	0.934096	0	0
ATENDIYNFFSPLNPMR	P55795	N-Term(Dimethyl)	2056.97	1.15225	1.25764	0.921761	0	0
LIDWGLAEFYHPAQEYNVR	P19784	N-Term(Dimethyl)	2349.16	1.12718	1.05164	1.07833	0	0
YAACNAVGQMATDFAPGFQK	O00410	N-Term(Dimethyl); C4(Carbamidomethyl); K20(Dimethyl)	2203.02	0.766715	0.727191	1.06075	0	0
SHFEQWGTLTDCVVMRDPNTK	F8W6I7	N-Term(Dimethyl); C12(Carbamidomethyl); K21(Dimethyl)	2577.22	1.04689	1.04963	1.2629	0	1
QICLVMLETLSQSPQGR	Q15365	N-Term(Dimethyl); C3(Carbamidomethyl)	1988.03	0.56422	0.68491	0.828787	0	0
TSTSNVEQYQAMVTSLEESLNK	P12270	N-Term(Dimethyl); K22(Dimethyl)	2515.22	1.07625	0.902243	1.2001	0	0
LNEAAAGLNQAATELVQASR	Q9Y490	N-Term(Dimethyl)	2055.08				0	0
ASGPGLNTTGVPASLPVEFTIDAK	P21333	N-Term(Dimethyl); K24(Dimethyl)	2398.28	0.789911	0.69437	1.1445	0	0
GSMAGSTGVHDTVVNQLLSK	I3L0N3	N-Term(Dimethyl); K20(Dimethyl)	2057.07	1.05835	1.06219	1.00244	0	0
HFADLLPGFLQAVNDSCYQNDDSVLK	O00410	N-Term(Dimethyl); C17(Carbamidomethyl); K26(Dimethyl)	3022.46				0	0
SHTSEGAHLDITPNSGAAGNSAGPK	Q92597	N-Term(Dimethyl); K25(Dimethyl)	2432.16	2.02928	4.12614	0.494794	0	0
LGEMWNNTAADDKQPYEK	P09429	N-Term(Dimethyl); K13(Dimethyl); K18(Dimethyl)	2194.04	0.197202	0.46233	0.795472	0	1
QKGADFLVTEVENGGSLGSK	P14618	N-Term(Dimethyl); K2(Dimethyl); N13(Deamidated); K20(Dimethyl)	2121.1	1.10126	1.4204	0.708428	0	1
QGQYDPPPGASNILGLEASGHVAELGPGCQGHWK	Q53FA7	N-Term(Dimethyl); C29(Carbamidomethyl); K34(Dimethyl)	3583.73				0	0
MVHNGIEYGDMQLICEAYHLMK	P52209	N-Term(Dimethyl); N4(Deamidated); C15(Carbamidomethyl); K22(Dimethyl)	2709.25				0	0
ALYPSSVGQPFQGAYLEINKNPK	E9PDF6	N-Term(Dimethyl); K20(Dimethyl); K23(Dimethyl)	2605.4	0.887604	1.18682	0.752422	0	1
VATAQDDITGDGTTSNVLIIGELLK	P40227	N-Term(Dimethyl); K25(Dimethyl)	2600.4	0.906328	1.05267	0.866202	0	0
LATMMVQGQEYEAGGSVIHPLNLHMK	Q9UHG3	N-Term(Dimethyl); K26(Dimethyl)	2910.46	1.36334	1.59576	0.859537	0	0
SGEEDFESLASQFSDCSSAK	Q13526	N-Term(Dimethyl); C16(Carbamidomethyl); K20(Dimethyl)	2236.96	1.0812	1.48158	0.734185	0	0
TITDVINIGIGGSDLGPLMVTEALKPYSSGGPR	P06744	N-Term(Dimethyl); K25(Dimethyl)	3384.81				0	0
FMVQSMFAPTDTSDMEAVWK	O95292	N-Term(Dimethyl); K20(Dimethyl)	2377.09				0	0
SCSFTAACCSHFSSVLAQNR	P13489	N-Term(Dimethyl); C2(Carbamidomethyl); C8(Carbamidomethyl); C9(Carbamidomethyl)	2318	1.28268	1.40208	0.92039	0	0
LVVEEYYEVLDHCSSILNK	O00170	N-Term(Dimethyl); C13(Carbamidomethyl); K19(Dimethyl)	2366.18				0	0
AGKPVICATQMLESMIK	P14618;H3BR70	N-Term(Dimethyl); K3(Dimethyl); C7(Carbamidomethyl); K17(Dimethyl)	1961.05				0	0
ESKEEETSIDVAGKPNEVTK	P53985	N-Term(Dimethyl); K3(Dimethyl); K14(Dimethyl); K20(Dimethyl)	2302.19	1.25251	1.06342	1.18496	0	1
QRFPLGGDDEVMSSTLQQFSK	Q9UKG1	N-Term(Dimethyl); K21(Dimethyl)	2426.2	1.22094	1.4662	0.837777	0	1
LVEGLQGQTWAPDWVEELR	A1L0T0	N-Term(Dimethyl)	2254.15				0	0
FQSSAVMALQEASEAYLVGLFEDTNLCAIHAK	Q71DI3	N-Term(Dimethyl); M7(Oxidation); C27(Carbamidomethyl); K32(Dimethyl)	3585.75				0	0
VIPAADLSQQISTAGTEASGTGNMK	P11216	N-Term(Dimethyl); K25(Dimethyl)	2503.27	0.964099	0.94337	1.02818	0	0
MSSFGDFVALSDVCDVPTAK	P31939	N-Term(Dimethyl); C14(Carbamidomethyl); K20(Dimethyl)	2202.04				0	0
VTDFGDKVEDPTFLNQLQSGVNR	Q14204	N-Term(Dimethyl); K7(Dimethyl)	2635.34	0.990671	0.979722	0.984501	0	1
VIESTQDLGNDLAGVMALQR	Q01082	N-Term(Dimethyl)	2158.11	1.20625	1.31737	0.921208	0	0
ISYHGSCPQGLADSAWIPFR	Q9UBG0	N-Term(Dimethyl); C7(Carbamidomethyl)	2290.1	1.36091	2.09206	0.65446	0	0
SLTNDWEDHLAVK	P08238;P07900	N-Term(Dimethyl); N4(Deamidated); K13(Dimethyl)	1584.79				0	0
AYLESEVAISEELVQK	F8W914	N-Term(Dimethyl); K16(Dimethyl)	1863.99	1.62212	0.65513	2.49106	0	0
DNTRPGANSPEMWSEAIK	A0A087X2G1	N-Term(Dimethyl); K18(Dimethyl)	2058.97				0	0
QNQTTSAVSTPASSETSK	P49792	N-Term(Dimethyl); K18(Dimethyl)	1879.92	0.957577	0.920415	1.04669	0	0
GAVLVCDMSSNFLSKPVDVSK	Q9Y617	N-Term(Dimethyl); C6(Carbamidomethyl); K15(Dimethyl); K21(Dimethyl)	2337.21	1.19164	1.15886	1.03453	0	0
TMLELLNQLDGFEATK	P62195	N-Term(Dimethyl); K16(Dimethyl)	1878.98	0.982563	1.0078	0.980872	0	0
EGNDLYHEMIESGVINLK	P06576	N-Term(Dimethyl); K18(Dimethyl)	2117.06	0.86278	0.831577	1.04382	0	0
IYKVPSTEAEALASSLMGLFEK	P50395	N-Term(Dimethyl); K3(Dimethyl); K22(Dimethyl)	2468.33	1.00394	0.9782	1.03254	0	1
QNLFTTWSHHLQQANIQFR	Q14204	N-Term(Dimethyl)	2397.21	0.91071	1.08981	0.840731	0	0
VLEDNKLPGAICSLTCGGADIGTAMAK	P49419	N-Term(Dimethyl); K6(Dimethyl); C12(Carbamidomethyl); C16(Carbamidomethyl); K27(Dimethyl)	2846.46	0.667579	1.64296	0.408794	0	1
ALEEDIENHATDVHQAVK	H3BPE1;H0YD69	N-Term(Dimethyl); K18(Dimethyl)	2075.03				0	0
TAEHEAAQQDLQSK	Q86UP2	N-Term(Dimethyl); K14(Dimethyl)	1611.79	0.921094	0.984281	0.941483	0	0
ISDSVLVDIKDTEPLIQTAK	P48643	N-Term(Dimethyl); K10(Dimethyl); K20(Dimethyl)	2269.29	0.917585	0.791197	1.16678	0	1
QFAPIHAEAPEFMEMSVEQEILVTGIK	P06576	N-Term(Dimethyl); K27(Dimethyl)	3100.57	0.962774	1.04706	0.925087	0	0
NLSEIENVHGFVSHSHISPIK	A0A0C4DFT3	N-Term(Dimethyl); K21(Dimethyl)	2400.26				0	0
SKPGAAMVEMADGYAVDR	P14866	N-Term(Dimethyl); K2(Dimethyl)	1923.92	0.738331	1.04192	0.793525	0	0
VIAINVDDPDAANYNDINDVKR	Q15181	N-Term(Dimethyl); K21(Dimethyl)	2500.26	1.1194	1.48212	0.759854	0	1
FLSQPFQVAEVFTGHMGK	P06576	N-Term(Dimethyl); M16(Oxidation); K18(Dimethyl)	2095.06	1.0247	0.756868	1.36209	0	0
TGLIPSNYVAEQAESIDNPLHEAAK	Q92882	N-Term(Dimethyl); K25(Dimethyl)	2723.39				0	0
LAVHPSGVALQDRVPLASQGLGPGSTVLLVVDK	A0A096LNZ9	N-Term(Dimethyl); Q11(Deamidated); Q19(Deamidated); K33(Dimethyl)	3351.92				0	1
LIPEMDQIFTEVEMTTLEK	A0A087X054	N-Term(Dimethyl); K19(Dimethyl)	2323.18	1.2655	1.40109	0.908702	0	0
MESQLSASKPTGGLPETAR	H3BPE1	N-Term(Dimethyl); K9(Dimethyl)	2016.04	0.713161	0.612583	1.17125	0	0
GFGFVTYSCVEEVDAAMCARPHK	P51991	N-Term(Dimethyl); C9(Carbamidomethyl); C18(Carbamidomethyl); K23(Dimethyl)	2687.24				0	0
MTLSNPSELDELMSEEAYEK	P23434	N-Term(Dimethyl); K20(Dimethyl)	2372.08	0.833188	0.601739	1.39304	0	0
IVENSDAVTEILNNAELLK	Q16401	N-Term(Dimethyl); K19(Dimethyl)	2141.17	1.18515	1.37522	0.867018	0	0
LQVEPAVDTSGVQCYGPGIEGQGVFR	P21333	N-Term(Dimethyl); C14(Carbamidomethyl)	2791.36	0.981093	0.703749	1.40256	0	0
LPIPESQVITINPELPVEEAAEDYAK	O95336	N-Term(Dimethyl); K26(Dimethyl)	2921.54				0	0
SSQTSGTNEQSSAIVSAR	O60763	N-Term(Dimethyl)	1837.88	1.10613	1.06868	1.04132	0	0
FAHTNVESLVNEYDDNGEGIILFRPSHLTNK	P30101	N-Term(Dimethyl); N16(Deamidated); K31(Dimethyl)	3586.79	1.47727	3.99881	0.371669	0	0
MVMIQDGPQNTGADKPLR	Q96AE4	N-Term(Dimethyl); K15(Dimethyl)	2027.04	0.986295	1.07899	0.919639	0	0
MDLEKPNYIVPDYMPVVYDKLPQPPSHR	Q14204	N-Term(Dimethyl); K5(Dimethyl); K20(Dimethyl)	3425.77				0	1
TVAGGAWTYNTTSAVTVK	C9J4Z3	N-Term(Dimethyl); K18(Dimethyl)	1882.99	1.22713	0.955643	1.14741	0	0
FLPGYVGGIQEGAVTPAGVVNK	Q9UBM7	N-Term(Dimethyl); K22(Dimethyl)	2229.23				0	0
LKGPQITGPSLEGDLGLK	Q09666	N-Term(Dimethyl); K2(Dimethyl); K18(Dimethyl)	1907.12	0.470647	0.410538	1.15337	0	1
ETWKDLENAQFSEIQMER	Q6UX53	N-Term(Dimethyl); K4(Dimethyl)	2310.1	0.90338	1.27804	0.762107	0	1
SVVLMSHLGRPDGVPMPDKYSLEPVAVELK	P00558	N-Term(Dimethyl); K19(Dimethyl); K30(Dimethyl)	3347.8				0	1
LNSNTQVVLLSATMPSDVLEVTKK	P60842	N-Term(Dimethyl); K23(Dimethyl); K24(Dimethyl)	2671.49	0.824175	0.728289	1.13853	0	1
LSFAHPPSAEVEAIALATLHDR	O15067	N-Term(Dimethyl)	2373.25	0.976262	1.02588	0.957412	0	0
GFAFVTFDDHDSVDK	F8W6I7	N-Term(Dimethyl); K15(Dimethyl)	1755.82	1.15523	0.900397	0.949073	0	0
ATENDIYNFFSPLNPVR	P31943;P52597	N-Term(Dimethyl)	2025				0	0
FGHLGLAINLITYDDRFNLK	P26196	N-Term(Dimethyl); K20(Dimethyl)	2376.3	0.896285	0.700958	1.28642	0	1
SRPFTVAASFQSTSVK	Q9UHB6	N-Term(Dimethyl); K16(Dimethyl)	1768.95	0.962985	0.899478	1.0771	0	0
ETNLDSLPLVDTHSKR	P08670	N-Term(Dimethyl); K15(Dimethyl)	1881	1.05007	0.938287	1.12592	0	1
DMAPSHCAEHKDQFLQLSQYR	O95479	N-Term(Dimethyl); C7(Carbamidomethyl); K11(Dimethyl)	2617.22	1.43401	2.00643	0.719043	0	1
AVTPPMPLLTPATPGGLPPAAAVAAAAATAK	Q9UHX1;E9PQ56	N-Term(Dimethyl); K31(Dimethyl)	2850.6				0	0
WGDEVEYMLVSFDHENKK	P48506	N-Term(Dimethyl); K17(Dimethyl); K18(Dimethyl)	2310.11	1.31485	1.75223	0.75494	0	1
GGGGPGGGGPGGGSAGGPSQPPGGGGPGIRK	A0A087WTP3	N-Term(Dimethyl); K31(Dimethyl)	2454.22				0	1
VAPEEHPVLLTEAPLNPK	P60709;I3L4N8	N-Term(Dimethyl); K18(Dimethyl)	2010.13				0	0
IHEGCEEPATHNALAK	Q00610	N-Term(Dimethyl); C5(Carbamidomethyl); K16(Dimethyl)	1832.89	0.97213	1.16508	0.926965	0	0
VSCLGVTDDGMAVATGSWDSFLK	P62879;P62873	N-Term(Dimethyl); C3(Carbamidomethyl); K23(Dimethyl)	2472.17				0	0
TDLEKDIISDTSGDFR	P07355	N-Term(Dimethyl); K5(Dimethyl)	1867.92	0.730021	0.58393	1.25777	0	1
LLETELLQEISEIEKR	Q8TDB6	N-Term(Dimethyl); K15(Dimethyl)	1999.13				0	1
TYTAYVDLEKDFAAEVVHPGDLK	P54577	N-Term(Dimethyl); K10(Dimethyl); K23(Dimethyl)	2665.37	0.922175	0.871346	1.06476	0	1
VDINTPDVDVHGPDWHLK	Q09666	N-Term(Dimethyl); K18(Dimethyl)	2113.07	0.675134	0.644338	1.05415	0	0
MVMIQDGPLPTGADKPLR	Q96I24	N-Term(Dimethyl); K15(Dimethyl)	1995.07				0	0
EFNEDGALAVLQQFK	O60506	N-Term(Dimethyl); K15(Dimethyl)	1764.91	0.93054	0.942877	0.992905	0	0
SFLEEVLASGLHSR	Q9NRW7	N-Term(Dimethyl)	1572.83				0	0
VCIESEHSMDTLLATLKK	E5RGN3	N-Term(Dimethyl); C2(Carbamidomethyl); K17(Dimethyl); K18(Dimethyl)	2159.14	0.835032	1.11079	0.756309	0	1
GMGGAFVLVLYDEIKK	P05141;P12235;P12236	N-Term(Dimethyl); K15(Dimethyl); K16(Dimethyl)	1824.03				0	1
MVNSNLASVEELKEIDVEVR	P08559	N-Term(Dimethyl); K13(Dimethyl)	2330.22	0.9688	0.905003	1.07699	0	1
VETGVLKPGMVVTFAPVNVTTEVK	P68104	N-Term(Dimethyl); K7(Dimethyl); M10(Oxidation); K24(Dimethyl)	2615.46	0.831529			0	0
AVDIPHMDIEALKK	P62906	N-Term(Dimethyl); K13(Dimethyl); K14(Dimethyl)	1663.94	0.93422	0.84066	1.13706	0	1
YLNQDYEALRNECLEAGTLFQDPSFPAIPSALGFK	P17655	N-Term(Dimethyl); C13(Carbamidomethyl); K35(Dimethyl)	4030.97	0.862852	1.24443	0.697581	0	1
EMSCIAEDVIIVTSSLTK	Q9Y678	N-Term(Dimethyl); C4(Carbamidomethyl); K18(Dimethyl)	2052.06				0	0
QNYVDLVSSLSPSLESSSQVEPGTDRK	A0A0C4DGA2	N-Term(Dimethyl); K27(Dimethyl)	2978.49				0	1
LTTLADLFRPPIDLMHK	O94888	N-Term(Dimethyl); K17(Dimethyl)	2037.15	1.18558	1.01385	1.17649	0	0
VSNGAGTMSVSLVADENPFAQGALK	A0A0A0MS51	N-Term(Dimethyl); N3(Deamidated); K25(Dimethyl)	2520.26	1.18432	1.72666	0.690067	0	0
SYSMIVNNLLKPISVEGSSK	Q9HB71	N-Term(Dimethyl); K11(Dimethyl); K20(Dimethyl)	2250.24	0.886233	1.00008	0.891544	0	0
WGDAGAEYVVESTGVFTTMEK	P04406	N-Term(Dimethyl); K21(Dimethyl)	2333.1	1.33841	1.55705	0.832598	0	0
LTLVFEHVDQDLTTYLDKVPEPGVPTETIK	Q00534	N-Term(Dimethyl); K18(Dimethyl); K30(Dimethyl)	3481.86	1.36033	1.49302	0.916658	0	1
LIALSIDSVEDHLAWSK	P30041	N-Term(Dimethyl); K17(Dimethyl)	1953.06	2.34366	0.994738	2.37035	0	0
RVIISAPSADAPMFVMGVNHEKYDNSLK	P04406	N-Term(Dimethyl); K22(Dimethyl); N25(Deamidated); K28(Dimethyl)	3174.61	1.08441	1.24925	0.873315	0	2
ALEEGLTPQEICDKYHIIHADIYR	P56192	N-Term(Dimethyl); C12(Carbamidomethyl); K14(Dimethyl)	2940.49	1.01346	0.975664	1.04504	0	1
LKTNHIGHTGYLNTVTVSPDGSLCASGGK	P63244	N-Term(Dimethyl); K2(Dimethyl); C24(Carbamidomethyl); K29(Dimethyl)	3068.57	0.759507	0.80675	0.947155	0	1
DLNSQADSLMTSSAFDTSQVK	Q13813	N-Term(Dimethyl); K21(Dimethyl)	2301.08	1.18589	1.35002	0.883756	0	0
LLQALAQYQNHLQEQPR	Q9BQG0	N-Term(Dimethyl)	2078.11				0	0
VNNSTMLGASGDYADFQYLK	P28070	N-Term(Dimethyl); K20(Dimethyl)	2250.07	0.769164			0	0
LILDVFCGSQMHFVR	P11413	N-Term(Dimethyl); C7(Carbamidomethyl)	1849.94	0.91724	0.927667	0.99476	0	0
TGYESGEYEMLGEGLGVK	Q13561	N-Term(Dimethyl); K18(Dimethyl)	1974.93	1.07999	1.04825	1.03653	0	0
ESVNAAFEMTLTEGSKLEK	P30084	N-Term(Dimethyl); K16(Dimethyl); K19(Dimethyl)	2168.1	0.90084	1.12019	0.809066	0	1
TLVSTVGSMVFNEGEAQR	A0A0A0MRV0	N-Term(Dimethyl)	1952.97	1.21176	1.43619	0.848852	0	0
GDLAQGFSPVIQGHTDELWGLCTHPSQNR	Q32P44	N-Term(Dimethyl); C22(Carbamidomethyl)	3248.54				0	0
NFESLSEAFSVASAAAVLSHNR	P04844	N-Term(Dimethyl)	2335.16				0	0
TALKEDGVLCCQGECQWLHLDLIK	P19623	N-Term(Dimethyl); K4(Dimethyl); C10(Carbamidomethyl); C11(Carbamidomethyl); C15(Carbamidomethyl); K24(Dimethyl)	2970.48	1.05712	0.881596	1.20637	0	1
MKYPHLVAGALAASAPVLAVAGLGDSNQFFR	Q9UHL4	N-Term(Dimethyl); K2(Dimethyl)	3227.73	1.9799	4.20615	0.473571	0	1
LYPWGVVEVENPEHNDFLK	Q15019	N-Term(Dimethyl); K19(Dimethyl)	2341.17				0	0
NDANPETHAFVTSPEIVTALAIAGTLK	Q99798	N-Term(Dimethyl); K27(Dimethyl)	2836.5	0.718987	1.29056	0.560492	0	0
YLLSQSSPAPLTAAEEELR	Q12792	N-Term(Dimethyl)	2103.09	1.03741	1.05402	0.99022	0	0
QLHPQLLLPDDYLDCLGK	P35052	N-Term(Dimethyl); C15(Carbamidomethyl); K18(Dimethyl)	2194.15				0	0
RGHVFEESQVAGTPMFVVK	P13639	N-Term(Dimethyl); K19(Dimethyl)	2174.14				0	1
YITGDQLGALYQDFVR	P09104	N-Term(Dimethyl)	1886.96				0	0
VAIQLNDTHPALSIPELMR	P11216	N-Term(Dimethyl)	2146.16	1.0625	1.17196	0.91211	0	0
EALVDTLTGILSPVQEVR	Q96P70	N-Term(Dimethyl)	1968.09	0.829659	0.812515	1.0273	0	0
VTTLPGHIQAVYVQNVVK	O14617	N-Term(Dimethyl); K18(Dimethyl)	2022.17				0	0
SADGVIVSGVKDVDDFFEHER	Q9UNH7	N-Term(Dimethyl); K11(Dimethyl)	2377.16	1.19079	1.25022	0.958249	0	1
ETSVTPSNLWGGQGLLGVSIR	Q9H8Y8	N-Term(Dimethyl)	2199.17	1.283	1.31169	0.984066	0	0
QIWTLEQPPDEAGSAAVCLR	Q16658	N-Term(Dimethyl); C18(Carbamidomethyl)	2269.13	1.13066	1.003	1.13412	0	0
GHVFEESQVAGTPMFVVK	P13639	N-Term(Dimethyl); K18(Dimethyl)	2018.04				0	0
RPLEQQQPHHIPTSAPVYQQPQQQPVAQSYGGYKEPAAPVSIQR	Q14847;J3KSN1	N-Term(Dimethyl); K34(Dimethyl)	4990.57				0	1
NVADDYIHTAACLHSLALEEPTVIKK	Q9Y5X3	N-Term(Dimethyl); C12(Carbamidomethyl); K25(Dimethyl); K26(Dimethyl)	2992.57				0	1
IKGGLFADIASHPWQAAIFAK	P00750	N-Term(Dimethyl); K2(Dimethyl); K21(Dimethyl)	2325.29	0.578332	0.162369	3.58346	0	1
LLEVNQQSLLGLTHGEAVQLLR	Q14160	N-Term(Dimethyl)	2459.4				0	0
TENPLILIDEVDKIGR	K7EJE8	N-Term(Dimethyl); K13(Dimethyl)	1881.06	1.04332	0.762952	1.37577	0	1
SEEPAGQILSHLSSELK	Q9UQ35	N-Term(Dimethyl); K17(Dimethyl)	1880.99	0.964851	0.767351	1.26501	0	0
VDINAPDVEVHGPDWHLK	Q09666	N-Term(Dimethyl); K18(Dimethyl)	2097.07	0.705736	0.670706	1.05861	0	0
FQQQLEQLNAMGFLNR	Q9UHD9	N-Term(Dimethyl)	1964.99				0	0
YLEEERPFAIEQVTGMLLAK	O95757	N-Term(Dimethyl); K20(Dimethyl)	2393.27	0.94069	1.29144	0.732827	0	0
YGAATANYMEVVSLLK	P43304	N-Term(Dimethyl); K16(Dimethyl)	1785.94	0.363513	0.395649	0.924352	0	0
VACVQVVIIPCGITNALSEEDKEALIAK	P07814	N-Term(Dimethyl); C3(Carbamidomethyl); C11(Carbamidomethyl); K22(Dimethyl); K28(Dimethyl)	3124.69				0	1
YAGSALQYEDVSTAVQNLQK	A0A087WY55	N-Term(Dimethyl); K20(Dimethyl)	2241.13	1.196	1.30335	0.923199	0	0
IYEAPDVMNLSQWSLQHEISCK	Q96EE3	N-Term(Dimethyl); C21(Carbamidomethyl); K22(Dimethyl)	2704.31	1.14855	0.931965	1.23987	0	0
ITHSPLTICFPEYTGANKYDEAASYIQSK	P04899	N-Term(Dimethyl); C9(Carbamidomethyl); K18(Dimethyl); K29(Dimethyl)	3388.65	0.866215	0.856424	1.01757	0	1
AMHQAQTMEGCSSPMVVK	Q92879	N-Term(Dimethyl); C11(Carbamidomethyl); K18(Dimethyl)	2047.94				0	0
AQDPSEVLTMLTNETGFEISSSDATVK	B4DY09	N-Term(Dimethyl); K27(Dimethyl)	2926.41				0	0
LAGANPAVITCDELLLGHEK	P78527	N-Term(Dimethyl); C11(Carbamidomethyl); K20(Dimethyl)	2177.16	0.898836	1.36977	0.660178	0	0
TNTPADVFIVFTDNETFAGGVHPAIALR	P10155	N-Term(Dimethyl)	3001.54				0	0
GIIRPGTAFELLEAQAATGYVIDPIK	Q15149	N-Term(Dimethyl); K26(Dimethyl)	2799.56	1.12357	1.4417	0.78407	0	0
VVLLGEFLHPCEDDIVCK	Q9NY12	N-Term(Dimethyl); C11(Carbamidomethyl); C17(Carbamidomethyl); K18(Dimethyl)	2199.11	1.16294	0.65048	1.79867	0	0
SEQDQAENEGEDSAVLMER	Q99613	N-Term(Dimethyl)	2164.93				0	0
AVVYSNTIQSIMAIVK	P04899	N-Term(Dimethyl); K16(Dimethyl)	1793.02	1.09797	1.04317	1.05892	0	0
DATNVGDEGGFAPNILENSEALELVK	P09104	N-Term(Dimethyl); K26(Dimethyl)	2758.36	1.415	1.6505	0.862519	0	0
VLQLYQITQINHGLMMVGPSGSGK	Q14204	N-Term(Dimethyl); K24(Dimethyl)	2627.4				0	0
IGGDAATTVNNSTPDFGFGGQK	A0A087WTP3	N-Term(Dimethyl); K22(Dimethyl)	2210.07				0	0
DIGEGNLSTAAAAALAAAAVK	Q8TAQ2	N-Term(Dimethyl); K21(Dimethyl)	1941.06				0	0
IGDQEFDSLPALLEFYK	P46108	N-Term(Dimethyl); K17(Dimethyl)	2041.05	1.08207	1.2048	0.860125	0	0
ALVQTEDHLLLFLQQLAGK	Q8N766	N-Term(Dimethyl); K19(Dimethyl)	2193.26				0	0
IDFEDVIAEPEGTHSFDGIWK	Q03135	N-Term(Dimethyl); K21(Dimethyl)	2461.19				0	0
HYLDFINHYANLFHEK	Q14204	N-Term(Dimethyl); K16(Dimethyl)	2117.05				0	0
WVGGQHPCFIIAEIGQNHQGDLDVAK	Q9NR45	N-Term(Dimethyl); C8(Carbamidomethyl); K26(Dimethyl)	2945.46	1.07578	1.08752	0.99521	0	0
EDKESNPATINAATELDTPK	P24821;J3QSU6	N-Term(Dimethyl); K3(Dimethyl); K20(Dimethyl)	2228.12				0	1
GTTGTQASFLQLFEGDDHKVEQLDK	P30566	N-Term(Dimethyl); K19(Dimethyl); K25(Dimethyl)	2848.43				0	1
SVDETTQAMAFDGIIFQGQSLK	K7ENG2	N-Term(Dimethyl); K22(Dimethyl)	2442.21	1.08256	1.05669	1.0307	0	0
HELQANCYEEVKDR	G3V1A4	N-Term(Dimethyl); C7(Carbamidomethyl); K12(Dimethyl)	1846.86	0.991901	1.01114	0.986924	0	1
RKPADLQNLAPGTHPPFITFNSEVK	Q9Y696	N-Term(Dimethyl); K2(Dimethyl); K25(Dimethyl)	2861.56	1.07414	1.41445	0.764012	0	1
RAGLGSGLSLSGLVHPELSR	P49748	N-Term(Dimethyl)	2034.14	1	0.920192	1.09333	0	1
VIMGEEVEPVGLMTGSGVVGVK	F8VPD4	N-Term(Dimethyl); K22(Dimethyl)	2243.19	1.1617	1.1526	1.01401	0	0
SLTNDWEDHLAVK	P08238;P07900	N-Term(Dimethyl); K13(Dimethyl)	1583.8				0	0
FQLTDCQIYEVLSVIR	Q16555	N-Term(Dimethyl); C6(Carbamidomethyl)	2012.05	1.67815	1.79074	0.942813	0	0
GAQVNAVNQNGCTPLHYAASK	B1AJY7	N-Term(Dimethyl); C12(Carbamidomethyl); K21(Dimethyl)	2256.11				0	0
YKLDFSLQPETGPGNLIDPIHEFK	Q5K651	N-Term(Dimethyl); K2(Dimethyl); K24(Dimethyl)	2842.5			1.0443	0	1
AALSEMVEYITHNR	Q13362	N-Term(Dimethyl)	1661.82	0.903496	0.897241	1.01308	0	0
QAIVDKVPSVSSSALVSSLHLLK	Q9Y678	N-Term(Dimethyl); K6(Dimethyl); K23(Dimethyl)	2462.45	0.952687	0.824102	1.16305	0	1
SGASGPENFQVGSMPPAQQQITSGQMHR	Q9Y490	N-Term(Dimethyl)	2955.39				0	0
VVMALGDYMGASCHACIGGTNVR	P60842	N-Term(Dimethyl); C13(Carbamidomethyl); C16(Carbamidomethyl)	2467.13				0	0
RPHDYQPLPGMSENPSVYVPGVVSTVVPDSAHK	K7ENG2	N-Term(Dimethyl); K33(Dimethyl)	3615.81				0	0
EVWNTYELDLVNYQNK	Q14204	N-Term(Dimethyl); K16(Dimethyl)	2084.03	0.71561	1.62205	0.443855	0	0
LKPKPIDVQVITHHMQR	P61158	N-Term(Dimethyl); K2(Dimethyl); K4(Dimethyl)	2124.24	0.661615	0.753557	0.883319	0	0
AASADSTTEGTPADGFTVLSTK	O75367	N-Term(Dimethyl); K22(Dimethyl)	2183.07	2.72328	2.26989	1.20702	0	0
NQDLAPNSAEQASILSLVTK	B4DY09	N-Term(Dimethyl); K20(Dimethyl)	2155.16	0.940406	1.14687	0.824955	0	0
IEEVPELPLVVEDKVEGYK	P36578	N-Term(Dimethyl); K14(Dimethyl); K19(Dimethyl)	2269.25	1.12594	0.90462	1.25221	0	1
STNGDTFLGGEDFDQALLR	P38646	N-Term(Dimethyl)	2083.98	0.924797	0.979904	0.949491	0	0
ESGSLSPEHGPVVVHCSAGIGR	P18031	N-Term(Dimethyl); C16(Carbamidomethyl)	2260.11	1.14263	1.08564	1.05888	0	0
AASSTSQSGLSNSSHNCSNKPSIGK	Q9BYI3	N-Term(Dimethyl); C17(Carbamidomethyl); K20(Dimethyl); K25(Dimethyl)	2590.24	0.701764	0.687127	1.0275	0	0
TGENVEDAFLEAAKK	P61106	N-Term(Dimethyl); K14(Dimethyl); K15(Dimethyl)	1705.9				0	1
SLEEEGQELPQSADVQR	P48681	N-Term(Dimethyl)	1942.93	1.20842	0.646609	1.8802	0	0
AQVPFSSCLEAYGAPEQVDDFWSTALQAK	P45974	N-Term(Dimethyl); C8(Carbamidomethyl); K29(Dimethyl)	3271.54	0.726961	0.992317	0.737035	0	0
LTPFMLGALVAMYEHK	P06744	N-Term(Dimethyl); K16(Dimethyl)	1877				0	0
AVMEQSGAWVQLSQKPDGINLQER	P51513	N-Term(Dimethyl); K15(Dimethyl)	2740.4	0.772136	1.45889	0.532477	0	0
GRPAPGFHHGDGPGNAVQEIMIPASK	Q96AE4;C9JSZ1	N-Term(Dimethyl); K26(Dimethyl)	2696.36				0	0
ENNAVYAFLGLTAPPGSK	O75368	N-Term(Dimethyl); K18(Dimethyl)	1905				0	0
NIIQQAIDAGEVPSYNAFVK	Q8WXX5	N-Term(Dimethyl); K20(Dimethyl)	2233.19				0	0
STAMEETAIWEQHTVTLHR	G3V1L9;G5E9E7	N-Term(Dimethyl)	2268.1				0	0
IDGDKDGFVTVDELKDWIK	O43852	N-Term(Dimethyl); K5(Dimethyl); K15(Dimethyl); K19(Dimethyl)	2305.22	0.806696	1.04088	0.779715	0	2
ETSSDVALASHILTALR	O00273	N-Term(Dimethyl)	1811.98	1.13293	1.04707	1.08856	0	0
SAVADKHELLSLASSNHLGK	O15372	N-Term(Dimethyl); K6(Dimethyl); K20(Dimethyl)	2161.19				0	1
LVTSIGDVVNHDPVVGDR	P11216	N-Term(Dimethyl)	1920.01				0	0
GQDHCGIESEVVAGIPR	P07858	N-Term(Dimethyl); C5(Carbamidomethyl)	1851.9				0	0
ISSIQSIVPALEIANAHR	P10809	N-Term(Dimethyl)	1947.1	0.916877	0.71045	1.29839	0	0
SGDAAIVDMVPGKPMCVESFSDYPPLGR	P68104	N-Term(Dimethyl); K13(Dimethyl); C16(Carbamidomethyl)	3051.46	0.691386	0.626728	1.17413	0	0
AAYLQETGKPLDETLKK	P04083	N-Term(Dimethyl); K9(Dimethyl); K16(Dimethyl); K17(Dimethyl)	2017.15	1.81204	2.23655	1.62842	0	1
ASLPTLGFTHFQPAQLTTVGK	P30566	N-Term(Dimethyl); K21(Dimethyl)	2270.26				0	0
VVSQYSSLLSPMSVNAVMK	P50991	N-Term(Dimethyl); K19(Dimethyl)	2096.1	1.04869	1.08541	0.972031	0	0
TNLYWPGTAEPLLVSSPEHPKR	P51688	N-Term(Dimethyl); K21(Dimethyl)	2548.35	1.9532	1.52416	1.28926	0	1
GDVAEGDLIEHFSQFGTVEK	Q13151	N-Term(Dimethyl); K20(Dimethyl)	2234.09	0.845774	1.14243	0.744825	0	0
GPVKPTGGPGGGGTQTQQQMNQLK	P26196	N-Term(Dimethyl); K4(Dimethyl); K24(Dimethyl)	2450.28				0	0
IFLLGLADNEAAIVQAESEETKER	Q9UHB9	N-Term(Dimethyl); K22(Dimethyl)	2702.43				0	1
LGSLLPVLSPTSLPSPLPATLETPVPAFLK	P48681	N-Term(Dimethyl); K30(Dimethyl)	3111.83	0.747369	0.509423	1.47599	0	0
HTCEQGDGVGPYGWEFHDGLSFGR	Q13724	N-Term(Dimethyl); C3(Carbamidomethyl)	2736.18				0	0
FKHLEEAFTSEHWLVR	Q8TCJ2	N-Term(Dimethyl); K2(Dimethyl)	2085.09			1.19003	0	1
YRCELLYEGPPDDEAAMGIK	P13639	N-Term(Dimethyl); C3(Carbamidomethyl); K20(Dimethyl)	2383.11	0.96971	0.901562	1.08212	0	1
HLCCLQALSAVSTHPSIVK	Q96T76	N-Term(Dimethyl); C3(Carbamidomethyl); C4(Carbamidomethyl); K19(Dimethyl)	2177.15				0	0
TVQLTSSELESTLETLK	P42704	N-Term(Dimethyl); K17(Dimethyl)	1935.05	0.634042	0.683974	0.932623	0	0
TYNTDVPLVLMNSFNTDEDTKK	A0A087WYS1	N-Term(Dimethyl); K21(Dimethyl); K22(Dimethyl)	2629.3	1.79145			0	1
MQEAMTQEVSDVFSDTTTPIK	P18206	N-Term(Dimethyl); K21(Dimethyl)	2414.13	0.817584	0.803534	1.02366	0	0
ILSLICNSSSEKPTVQQLQILWK	Q9Y263	N-Term(Dimethyl); C6(Carbamidomethyl); K12(Dimethyl); K23(Dimethyl)	2769.55	1.16072	1.1162	1.04619	0	0
YAGLQGLMSVLAEIRPK	P35573	N-Term(Dimethyl); K17(Dimethyl)	1902.08	1.11825	1.19869	0.938556	0	0
GLVVLGFPCNQFGHQENAKNEEILNSLK	A0A087WUQ6	N-Term(Dimethyl); C9(Carbamidomethyl); K19(Dimethyl); K28(Dimethyl)	3239.68	1.03127	1.22142	0.849448	0	1
TKEEALELINGYIQK	Q13526	N-Term(Dimethyl); K2(Dimethyl); K15(Dimethyl)	1833.03	0.832502	0.9065	0.923943	0	1
IVGLDQVTGMTETAFGSAYK	P35580	N-Term(Dimethyl); K20(Dimethyl)	2144.08	1.01187	0.835472	1.21848	0	0
SIMAAAGVPVVEGYHGEDQSDQCLK	E9PHF7	N-Term(Dimethyl); C23(Carbamidomethyl); K25(Dimethyl)	2717.29				0	0
FYVPPTQEDGVDPVEAFAQNVLSK	Q08945	N-Term(Dimethyl); K24(Dimethyl)	2706.36	1.02102	0.997031	0.841704	0	0
AFAMIIDKLEEDISSSMTNSTAASRPPVTLR	Q15366;F8VZX2	N-Term(Dimethyl); K8(Dimethyl)	3407.75				0	1
FVPYLIAGIQHSCQDIGAK	P12268	N-Term(Dimethyl); C13(Carbamidomethyl); K19(Dimethyl)	2173.14			1.02839	0	0
AYHEQLSVAEITNACFEPANQMVK	P68363	N-Term(Dimethyl); C15(Carbamidomethyl); M22(Oxidation); K24(Dimethyl)	2822.34				0	0
NQSQGYNQWQQGQFWGQKPWSQHYHQGYY	Q00839	N-Term(Dimethyl); K18(Dimethyl)	3714.65				0	0
IFQGSFGGPTLYENPHYQSPNMHR	Q8TDN6	N-Term(Dimethyl)	2805.31				0	0
HLAPPGLHPVPGGVFPVPPAAVVLMK	Q12996	N-Term(Dimethyl); K26(Dimethyl)	2653.54	1.10627	1.14479	0.972215	0	0
MASAPASYGSTTTKPMGLLSR	Q8WVM8	N-Term(Dimethyl); K14(Dimethyl)	2183.12	1.09409	1.12772	0.976066	0	0
LKGEMMDLQHGSLFLQTPK	P07195	N-Term(Dimethyl); K2(Dimethyl); K19(Dimethyl)	2257.19	0.845462	1.15038	0.739399	0	1
EIVYPNIEETHWLSNLESTHWLEHIK	C9JEX3	N-Term(Dimethyl); K26(Dimethyl)	3273.65	1.00904	1.23711	0.820597	0	0
NIEVMNSFELLSHTVEEK	E7EM64	N-Term(Dimethyl); K18(Dimethyl)	2175.09			1.22232	0	0
EAEAAIYHLQLFEELR	P14618	N-Term(Dimethyl)	1960.01	1.32755	1.89979	0.703025	0	0
GYIFLEYASPAHAVDAVK	P55884	N-Term(Dimethyl); K18(Dimethyl)	2007.05	1.06558	1.02796	1.04289	0	0
SLQELFLAHILSPWGAEVK	P09874	N-Term(Dimethyl); K19(Dimethyl)	2194.22				0	0
THINIVVIGHVDSGK	P68104;Q05639	N-Term(Dimethyl); K15(Dimethyl)	1644.94				0	0
LATDKNDPHLCDFIETHYLNEQVK	P02794	N-Term(Dimethyl); K5(Dimethyl); C11(Carbamidomethyl); K24(Dimethyl)	2984.48	1.24872	1.67576	0.749687	0	1
YASICQQNGIVPIVEPEILPDGDHDLK	P04075	N-Term(Dimethyl); C5(Carbamidomethyl); K27(Dimethyl)	3076.58				0	0
EKIDLENTLEQEQEALVNR	Q16204	N-Term(Dimethyl); K2(Dimethyl)	2327.2	0.688341	0.843631	0.820879	0	1
VAEKLDEIYVAGLVAHSDLDER	O60506	N-Term(Dimethyl); K4(Dimethyl)	2498.32				0	1
GIDIHGVPYVINVTLPDEK	A0A087X2G1	N-Term(Dimethyl); K19(Dimethyl)	2135.17	1.02373	1.62515	0.63375	0	0
ISIVEALTLLNNHK	Q9P032	N-Term(Dimethyl); K14(Dimethyl)	1620.96	1.15984	1.22373	0.953545	0	0
GATYGKPVHHGVNQLK	P61313	N-Term(Dimethyl); K6(Dimethyl); K16(Dimethyl)	1790	0.882865	0.816573	1.1233	0	0
LVQDVANNTNEEAGDGTTTATVLAR	P10809	N-Term(Dimethyl); N10(Deamidated)	2589.27				0	0
DRPQEADGIDSVIVVDNVPQVGPDRLEK	P55884	N-Term(Dimethyl); K28(Dimethyl)	3116.6	0.917522	0.784902	1.17606	0	1
SCCDYALHVDITHWNDSVK	Q14195	N-Term(Dimethyl); C2(Carbamidomethyl); C3(Carbamidomethyl); K19(Dimethyl)	2376.06	0.874795	1.4858	0.592344	0	0
NMDPLNDNIATLLHQSSDK	P35579	N-Term(Dimethyl); K19(Dimethyl)	2182.07				0	0
ALEHAFQLEHIMDLTR	Q14204	N-Term(Dimethyl)	1952				0	0
MSATFIGNSTAIQELFK	Q9BVA1;Q13885;P68371	N-Term(Dimethyl); K17(Dimethyl)	1914				0	0
QSEDLGSQFTEIFIK	O60763	N-Term(Dimethyl); K15(Dimethyl)	1797.92	1.02048	1.09193	0.940241	0	0
YLYVDKNFINNPLAQADWAAK	P35579	N-Term(Dimethyl); K6(Dimethyl); K21(Dimethyl)	2538.33	0.292615	0.999649	0.294494	0	1
RGFCFITYTDEEPVKK	A0A087WUK2	N-Term(Dimethyl); C4(Carbamidomethyl); K15(Dimethyl); K16(Dimethyl)	2074.06	1.01738	1.05728	0.968106	0	2
TQFPSLDIEVDGGVGPDTVHK	C9J9T0	N-Term(Dimethyl); K21(Dimethyl)	2267.14				0	0
NEAIQAAHDAVAQEGQCR	P09936	N-Term(Dimethyl); C17(Carbamidomethyl)	1995.93	1.19339	1.47802	0.898612	0	0
HQAFMAELASNKEWLDKIEK	Q01082	N-Term(Dimethyl); K12(Dimethyl); K17(Dimethyl); K20(Dimethyl)	2500.32				0	2
LIEGLSHEVIVSAACGR	Q9P258	N-Term(Dimethyl); C15(Carbamidomethyl)	1838.98	1.07591	1.26317	0.856924	0	0
TDQVIQSLIALVNDPQPEHPLR	P68036	N-Term(Dimethyl)	2511.35	1.38748	1.50614	0.926806	0	0
GNQLQEFAAMLMPHQK	Q9BT78	N-Term(Dimethyl); K16(Dimethyl)	1898.95				0	0
IATGQIAGVDKDGRPLQPHVR	Q9HC35	N-Term(Dimethyl); K11(Dimethyl)	2284.28	1.01611	1.04756	0.975864	0	1
GWDQGLLGMCEGEKR	P26885	N-Term(Dimethyl); C10(Carbamidomethyl); K14(Dimethyl)	1791.84				0	1
TLSDLKLDYLDLYLIHWPTGFKPGK	P15121	N-Term(Dimethyl); K6(Dimethyl); K22(Dimethyl); K25(Dimethyl)	3045.7				0	1
HHVLQNDVLAHQSTVEAVNK	E9PHM6;Q03001	N-Term(Dimethyl); K20(Dimethyl)	2295.21				0	0
ASTEQAPELENLTVTEVGWDGLR	P24821;J3QSU6	N-Term(Dimethyl)	2543.26				0	0
ANALHATNNLQIIPDFSLK	Q9P2R3	N-Term(Dimethyl); Q11(Deamidated); K19(Dimethyl)	2137.18				0	0
TKVHAELADVLTEAVVDSILAIK	P40227	N-Term(Dimethyl); K2(Dimethyl); K23(Dimethyl)	2519.46	0.906373	1.24228	0.73403	0	1
SFYSGAVVSHHETALGLPR	Q9HC78	N-Term(Dimethyl)	2056.06	1.07341	1.19674	0.902387	0	0
TNVLGHLQQGGAPTPFDR	P17858	N-Term(Dimethyl)	1936	1.4126	1.44641	0.98255	0	0
IKPHLMSQELPEDWDKQPVK	P07237	N-Term(Dimethyl); K2(Dimethyl); K16(Dimethyl); K20(Dimethyl)	2530.37	1.69689	2.19864	0.776477	0	1
NGPLEVAGAAVSAGHGLPAK	O75367	N-Term(Dimethyl); K20(Dimethyl)	1872.03	0.862997	0.89204	1.50174	0	0
ALEEQNELLSAELGGLR	P48681	N-Term(Dimethyl)	1869.99	0.658973	0.416631	1.59127	0	0
GWVLGPNNYYSFASQQQKPEDTTIPSTELAK	R4GMR5	N-Term(Dimethyl); K18(Dimethyl); K31(Dimethyl)	3553.77	1.1048	0.892762	1.24502	0	0
TRDELEVIHLIEEHR	P10155	N-Term(Dimethyl)	1917.01	1.06442	1.05491	1.01514	0	1
SAALPIFSSFVSNWDEATKR	O76021	N-Term(Dimethyl); K19(Dimethyl)	2282.16	1.01806	0.759731	1.34816	0	1
LVVLDEELEGISPDELKDELPER	P60983	N-Term(Dimethyl); K17(Dimethyl)	2693.42				0	1
AGQMVTVWAAGAGVAHSPPSTLVWK	J9JID7	N-Term(Dimethyl); K25(Dimethyl)	2577.36	0.679325	1.02917	0.664073	0	0
SLDLFNCEITNLEDYR	Q9BTT0	N-Term(Dimethyl); C7(Carbamidomethyl)	2029.95	1.24801	1.24334	1.00985	0	0
GYGYGQGAGTLSTDKGESLGIK	P21291	N-Term(Dimethyl); K15(Dimethyl); K22(Dimethyl)	2243.15	1.31244	2.33828	0.564692	0	1
VTIAQGYDALSSMANIAGYK	Q13423	N-Term(Dimethyl); K20(Dimethyl)	2129.09				0	0
QAWFIENEEQEYVQTVK	P04083	N-Term(Dimethyl); K17(Dimethyl)	2197.08	0.802227	1.39073	0.983599	0	0
LGQSDPAPLQHQMDIYQK	P29401	N-Term(Dimethyl); K18(Dimethyl)	2125.07	1.85098	1.19533	1.55791	0	0
STSVSSQAAQAASPQVPATTTPK	E9PHM6;Q03001	N-Term(Dimethyl); K23(Dimethyl)	2271.18				0	0
VAMQDATAQMAMLQFISSGLSK	Q99798	N-Term(Dimethyl); K22(Dimethyl)	2384.2				0	0
TKVENGEGTIPVESSDIVPTWDGIR	P55265	N-Term(Dimethyl); K2(Dimethyl)	2755.41	1.28403	1.27313	1.01468	0	1
GVGVFGDMAQDTGIPADIWR	P56192	N-Term(Dimethyl)	2133.04	0.872443	1.36901	0.641146	0	0
QVELALWDTAGQEDYDR	Q5JR08;P62745;P61586	N-Term(Dimethyl)	2036.95				0	0
SLSTTNVFACSDRPTVIYSSNHK	Q16531	N-Term(Dimethyl); C10(Carbamidomethyl); K23(Dimethyl)	2640.3	0.835192	0.916973	0.916341	0	0
WARPPISMNFEVPFAPSGLK	A0A087WY71	N-Term(Dimethyl); K20(Dimethyl)	2300.22	0.808164	0.810157	1.00359	0	0
ELASQPDVDGFLVGGASLKPEFVDIINAK	P60174	N-Term(Dimethyl); K19(Dimethyl); N27(Deamidated); K29(Dimethyl)	3114.66	1.13823	1.46044	0.784105	0	0
AHSPMIAVGSDDSSPNAMAK	Q96EE3	N-Term(Dimethyl); K20(Dimethyl)	2041.95	0.975266	0.749823	1.30856	0	0
ISQAEEEDQQLLGHLLLVAK	Q9BX68	N-Term(Dimethyl); K20(Dimethyl)	2290.26	1.0603	0.978487	1.09018	0	0
EEIVDKYDLFVGSQATDFGEALVR	O43852	N-Term(Dimethyl); K6(Dimethyl); Q14(Deamidated)	2758.4				0	1
LKGIEEEEILPGFILCDPNNLCHSGR	P15170	N-Term(Dimethyl); K2(Dimethyl); C16(Carbamidomethyl); C22(Carbamidomethyl)	3066.53		0.637577		0	1
SFSTFDKDTDSAITNCALSYK	P24821;J3QSU6	N-Term(Dimethyl); K7(Dimethyl); C16(Carbamidomethyl); K21(Dimethyl)	2455.16				0	1
EFIGSFLEMFGPEGALK	P49585	N-Term(Dimethyl); K17(Dimethyl)	1927.98				0	0
GPLLVQDVVFTDEMAHFDR	P04040	N-Term(Dimethyl)	2217.09				0	0
VELFFKDDANNDPQWSEEQLIAAK	P22234	N-Term(Dimethyl); K6(Dimethyl); K24(Dimethyl)	2891.43				0	1
AAELIANSLATAGDGLIELR	P35232	N-Term(Dimethyl)	2026.11	0.999792	0.887921	1.13283	0	0
QAAPCVLFFDELDSIAK	P55072	N-Term(Dimethyl); C5(Carbamidomethyl); K17(Dimethyl)	1980.01	1.05202	1.1179	0.946774	0	0
TLDGGLNVIQLETAVGAAIK	A0A087WYS1	N-Term(Dimethyl); K20(Dimethyl)	2039.17				0	0
TPLVSVLLEGPPHSGK	I3L0N3	N-Term(Dimethyl); K16(Dimethyl)	1686.97	0.836012	1.12845	0.745348	0	0
GITNLCVIGGDGSLTGADTFR	P08237	N-Term(Dimethyl); C6(Carbamidomethyl)	2152.06				0	0
QILVGDIGDTVEDPYTSFVK	Q9Y281	N-Term(Dimethyl); K20(Dimethyl)	2252.16	0.951663	0.951638	1.0061	0	0
SLKPGALSNSESIPTIDGLR	O95630	N-Term(Dimethyl); K3(Dimethyl)	2111.16	0.663148	1.07168	0.622549	0	0
MAESMLAILCHILR	Q7Z6Z7	N-Term(Dimethyl); C10(Carbamidomethyl)	1685.89	0.912605	0.903014	1.01675	0	0
FAHIDGDHLTLLNVYHAFK	O43143	N-Term(Dimethyl); K19(Dimethyl)	2267.19	0.810593	0.957918	0.851339	0	0
STMVGTPYWMAPEVVTR	Q13177;Q13153;A0A087X294	N-Term(Dimethyl)	1952.96				0	0
AAQLVDKDSTFLSTLEHHLSR	Q969V3	N-Term(Dimethyl); K7(Dimethyl)	2424.28	1.22993	1.14927	1.07668	0	1
EAENLMQEEHDNQANVR	P09914	N-Term(Dimethyl)	2054.91	3.37259	3.08915	1.09838	0	0
LCNYLSHHLTISPQSGNFR	D6REB4	N-Term(Dimethyl); C2(Carbamidomethyl)	2272.11	1.04759	0.867409	1.21506	0	0
MVVNEGSDGGQSVYHVHLHVLGGR	P49773	N-Term(Dimethyl)	2575.28	1.39156	1.64966	0.848662	0	0
TSIDAYDNFDNISLAQR	Q00610;K7EJJ5	N-Term(Dimethyl)	1970.94				0	0
VADLVHILTHLQLLR	P51617	N-Term(Dimethyl)	1769.07	0.862876	1.03622	0.837766	0	0
AIPDLTAPVAAVQAAVSNLVR	P18206	N-Term(Dimethyl)	2104.21	0.895714	0.868061	1.03812	0	0
AAFGQGSGPIMLDEVQCTGTEASLADCK	Q08380	N-Term(Dimethyl); Q16(Deamidated); C17(Carbamidomethyl); C27(Carbamidomethyl); K28(Dimethyl)	2970.36				0	0
ELGLVDGQELAVADVTTPQTVLFK	Q8TBC4	N-Term(Dimethyl); K24(Dimethyl)	2599.43				0	0
LLPPAQDGFEVLGAAELEAVR	Q8WZA9	N-Term(Dimethyl)	2223.2	0.749487	0.59908	1.25866	0	0
HLAGLGLTEAIDKNK	P50454	N-Term(Dimethyl); K13(Dimethyl); K15(Dimethyl)	1663.97				0	1
VTIAQGGVLPNIQAVLLPK	Q96KK5;P04908	N-Term(Dimethyl); K19(Dimethyl)	1987.23				0	0
TGAICAIDYTWNLLK	Q05209	N-Term(Dimethyl); C5(Carbamidomethyl); K15(Dimethyl)	1794.94	0.891648	0.94453	0.949742	0	0
QTNLENLDQAFSVAER	Q15149	N-Term(Dimethyl)	1862.92	1.06879	1.14151	0.941975	0	0
EAALTSEEVGADLEQVEVLQK	Q13813	N-Term(Dimethyl); K21(Dimethyl)	2314.2	0.887397	1.21855	0.732661	0	0
LQEDKEQMAQQLAEETQGFQR	Q15149	N-Term(Dimethyl); K5(Dimethyl)	2563.23	0.861003	0.845802	1.02415	0	1
EQTEGEYSSLEHESAR	O43837	N-Term(Dimethyl)	1879.83	0.829715	0.682664	1.22278	0	0
AFLASPEYVNLPINGNGK	P09211	N-Term(Dimethyl); N14(Deamidated); N16(Deamidated); K18(Dimethyl)	1962.03	1.03491	1.28571	0.809817	0	0
IVASTLSNPELFEEWTGNVK	P17174	N-Term(Dimethyl); K20(Dimethyl)	2290.19	0.687582	1.2287	0.562997	0	0
ISVMGGEQAANVLATITK	Q9HCC0	N-Term(Dimethyl); K18(Dimethyl)	1859.02				0	0
EHSSLGHADLDALQQNPQPLIFHMEMLK	O00170	N-Term(Dimethyl); K28(Dimethyl)	3255.62	1.98124	2.96542	0.672168	0	0
AQIQQFHSQIAAQTSASVLAEELHK	Q86UP2	N-Term(Dimethyl); K25(Dimethyl)	2791.46	0.973736	1.01191	0.968118	0	0
QQEVVVAGSSLPTSSK	Q9H3P7	N-Term(Dimethyl); K16(Dimethyl)	1672.91	0.999913	1.02759	0.978967	0	0
TLSHPQQMALLDQTK	Q9Y490	N-Term(Dimethyl); K15(Dimethyl)	1766.94	0.933511	1.03705	0.959486	0	0
ALNALCDGLIDELNQALK	P30084	N-Term(Dimethyl); C6(Carbamidomethyl); K18(Dimethyl)	2027.09				0	0
YTLPPGVDPTQVSSSLSPEGTLTVEAPMPK	P04792	N-Term(Dimethyl); K30(Dimethyl)	3154.62	1.0727	1.21226	0.890252	0	0
GFLWDEGFHQLVVQR	Q13724	N-Term(Dimethyl)	1858.95	1.38124	1.51035	0.920065	0	0
TYPKDPYQEEEWPQGFGQLTK	E9PQY3	N-Term(Dimethyl); K4(Dimethyl); K21(Dimethyl)	2625.28	1.08326	1.55813	0.699448	0	1
LQDFNVGDYIEAVLDR	P11216	N-Term(Dimethyl)	1894.95	1.00131	1.0144	1.00616	0	0
ETPFLSNPGTNLVFEDEITALQPEVDKLK	P21589	N-Term(Dimethyl); K27(Dimethyl); K29(Dimethyl)	3328.75				0	1
MLLDPMGGIVMTNDGNAILR	P49368	N-Term(Dimethyl)	2159.1				0	0
MIQDGKGDVTITNDGATILK	P50991	N-Term(Dimethyl); K6(Dimethyl); K20(Dimethyl)	2174.17	1.00756	1.12929	0.897619	0	1
QVLDLEDLVFTQGSHFMANKR	O75643	N-Term(Dimethyl); K20(Dimethyl)	2504.29	1.20646	1.30907	0.927208	0	1
TATESFASDPILYRPVAVALDTKGPEIR	P14618	N-Term(Dimethyl); K23(Dimethyl)	3073.65	1.50881	1.74149	0.871649	0	1
LAAAILGGVDQIHIKPGAK	P22087	N-Term(Dimethyl); K15(Dimethyl); K19(Dimethyl)	1956.2	0.903479	0.918387	0.989738	0	0
LGGSLADSYLDEGFLLDK	P78371	N-Term(Dimethyl); K18(Dimethyl)	1969.01	0.732278	0.699206	1.05365	0	0
EGDALELTCEAIGKPQPVMVTWVR	A0A087X105	N-Term(Dimethyl); C9(Carbamidomethyl); K14(Dimethyl)	2755.41	1.42506	1.83196	0.782609	0	0
ETNLDSLPLVDTHSK	P08670	N-Term(Dimethyl); K15(Dimethyl)	1724.91	1.15617	0.972669	1.02876	0	0
LLAELPASVHALTGVDLSK	J3QLD9	N-Term(Dimethyl); K19(Dimethyl)	1990.15	0.98463	1.51738	0.652839	0	0
GSQFAYGDHQSPNTAITQMTFLR	P05997	N-Term(Dimethyl)	2598.23				0	0
QQLSAEELDAQLDAYNAR	Q86V81	N-Term(Dimethyl)	2063	1.01126	1.06475	0.955526	0	0
IEGDMIVCAAYAHELPK	P46777	N-Term(Dimethyl); C8(Carbamidomethyl); K17(Dimethyl)	1972.98	0.766419	0.595927	1.2939	0	0
DLEADIIGDTSGHFQK	P08133	N-Term(Dimethyl); K16(Dimethyl)	1801.89	1.55946	1.49622	0.709348	0	0
HTGPGLLSMANQGQNTNNSQFVITLK	P49792	N-Term(Dimethyl); K26(Dimethyl)	2826.46				0	0
ENIVEAIIHSPELIR	O95373	N-Term(Dimethyl)	1760.99	0.898073	0.81386	1.11017	0	0
SLLVIPNTLAVNAAQDSTDLVAK	P17987	N-Term(Dimethyl); K23(Dimethyl)	2409.36				0	0
EMITMLHYDLLHHPYEPSGNKK	Q99459	N-Term(Dimethyl); K21(Dimethyl); K22(Dimethyl)	2737.38	1.04078	1.04098	1.00588	0	1
EISGLWNELDSLKDAVEHQR	Q86UP2	N-Term(Dimethyl); K13(Dimethyl)	2395.22	1.08136	1.03548	1.05064	0	1
QLLCDLVGISPSSEHDVLK	Q9UDR5	N-Term(Dimethyl); C4(Carbamidomethyl); K19(Dimethyl)	2166.14	0.667423	0.54606	1.22967	0	0
HHGPQTLYLPVTLSSIPVFQR	Q14697;E9PKU7	N-Term(Dimethyl)	2418.32				0	0
NPYYGGESSSITPLEELYK	P31150	N-Term(Dimethyl); K19(Dimethyl)	2203.08			0.923698	0	0
IEVPLYSLLEQTHLK	Q92598	N-Term(Dimethyl); K15(Dimethyl)	1839.06	0.866521	0.785029	1.11051	0	0
EGICALGGTSELSSEGTQHSYSEEEKYAFVNWINK	P13797	N-Term(Dimethyl); C4(Carbamidomethyl); K26(Dimethyl); K35(Dimethyl)	4004.89				0	1
VNNSSLIGLGYTQTLKPGIK	P21796	N-Term(Dimethyl); K16(Dimethyl); K20(Dimethyl)	2187.26			1.03182	0	0
AYCEPCYINTLEQCNVCSKPIMER	Q93052	N-Term(Dimethyl); C3(Carbamidomethyl); C6(Carbamidomethyl); C14(Carbamidomethyl); C17(Carbamidomethyl); K19(Dimethyl)	3091.36	1.17213	1.36278	0.865327	0	0
QQVHVELDVAKPDLTAALK	P14136	N-Term(Dimethyl); K11(Dimethyl); K19(Dimethyl)	2159.25				0	0
NQASCGSCYSFASMGMLEAR	P53634	N-Term(Dimethyl); C5(Carbamidomethyl); C8(Carbamidomethyl)	2254.93				0	0
EKAPSIIFIDELDAIGTK	R4GNH3	N-Term(Dimethyl); K2(Dimethyl); K18(Dimethyl)	2044.16	1.02509	0.983737	1.04836	0	1
HILYGCSELFNATQFIK	Q8WVM8	N-Term(Dimethyl); C6(Carbamidomethyl); K17(Dimethyl)	2097.08	0.609329	0.701836	0.873461	0	0
QYLVFHDGDSVVFAGPAGNSVETR	P13798	N-Term(Dimethyl)	2593.26	3.23339	5.04225	0.645152	0	0
EAVEKEFEPLLNWMK	P14625	N-Term(Dimethyl); K5(Dimethyl); K15(Dimethyl)	1947.02	1.27721	1.3755	0.934179	0	1
EDEEESLNEVGYDDIGGCR	P55072	N-Term(Dimethyl); C18(Carbamidomethyl)	2213.91				0	0
LVSLASEVQDLHLAQR	Q96N66	N-Term(Dimethyl)	1807	1.82734	1.119	1.64292	0	0
DATNVGDEGGFAPNILENK	P06733	N-Term(Dimethyl); K19(Dimethyl)	2016.98	0.755619	1.25516	1.17612	0	0
AGAAAGGPGVSGVCVCK	Q16270	N-Term(Dimethyl); C14(Carbamidomethyl); C16(Carbamidomethyl); K17(Dimethyl)	1573.78	0.856698	0.840797	1.02509	0	0
YYGGTEFIDELETLCQK	P34896	N-Term(Dimethyl); C15(Carbamidomethyl); K17(Dimethyl)	2122	2.33748	1.80561	1.30242	0	0
CGSLGNIHHKPGGGQVEVK	P10636	N-Term(Dimethyl); C1(Carbamidomethyl); K10(Dimethyl); K19(Dimethyl)	2058.09				0	0
LYQHAVEYFLHAIK	Q9UN37	N-Term(Dimethyl); K14(Dimethyl)	1787.98	1.11159	1.1883	0.941127	0	0
IGYNPDTVAFVPISGWNGDNMLEPSANMPWFK	P68104	N-Term(Dimethyl); K32(Dimethyl)	3623.72	0.913513	0.921719	0.997111	0	0
AFVDFLSDEIKEER	Q07021	N-Term(Dimethyl); K11(Dimethyl)	1753.9	0.864424	0.777435	1.11864	0	1
AEASSGDHPTDTEMKEEQK	Q02790	N-Term(Dimethyl); K15(Dimethyl); K19(Dimethyl)	2173.98	1.05464	0.955871	1.09164	0	1
DNIACVILTFKEPFGTEGR	P11413;E7EUI8	N-Term(Dimethyl); C5(Carbamidomethyl); K11(Dimethyl)	2223.14				0	1
VSQFLVDGVCTVANCVGK	Q8N0X7	N-Term(Dimethyl); C10(Carbamidomethyl); C15(Carbamidomethyl); K18(Dimethyl)	2009.01	1.03503	0.937388	1.11086	0	0
NATNVEQAFMTMAAEIK	Q9H0U4	N-Term(Dimethyl); K17(Dimethyl)	1924.94	1.01401	1.1927	0.855334	0	0
ILNNSGLPITSAIDLEDAAK	Q96I99	N-Term(Dimethyl); K20(Dimethyl)	2111.15	0.860885	0.697102	1.24244	0	0
VAVLGASGGIGQPLSLLLK	P40926	N-Term(Dimethyl); K19(Dimethyl)	1849.15				0	0
SSSQYIESFWQSSQSQNFTAHDK	Q5JTV8	N-Term(Dimethyl); K23(Dimethyl)	2748.25	0.976141	1.03552	0.948377	0	0
LTGIKHELQANCYEEVKDR	G3V1A4	N-Term(Dimethyl); K5(Dimethyl); C12(Carbamidomethyl); K17(Dimethyl)	2387.23	0.98782	0.867106	1.0753	0	2
YSTKPDAVFAGAMPTMASVK	Q2PZI1	N-Term(Dimethyl); K4(Dimethyl); K20(Dimethyl)	2156.11				0	0
TGGAYGEDLGADYNLSQVCDGK	P49327	N-Term(Dimethyl); C19(Carbamidomethyl); K22(Dimethyl)	2346.05	0.69381	0.548274	1.27313	0	0
IGNTGGMLDNILASK	P53396	N-Term(Dimethyl); K15(Dimethyl)	1559.84	0.914912	0.868105	1.06031	0	0
SFANTLVDVCAYAGSGNVLK	Q13200	N-Term(Dimethyl); C10(Carbamidomethyl); K20(Dimethyl)	2142.09	1.03343	0.976043	1.06522	0	0
YGIVDYMIEQSGPPSK	P13667	N-Term(Dimethyl); K16(Dimethyl)	1839.92	1.45438	1.25259	1.16814	0	0
ASYGVEDPEYAVTQLAQTTMR	Q9UJZ1	N-Term(Dimethyl)	2358.12	1.05313	0.948722	1.11679	0	0
SFGMTPVLPAFAGHVPEAVTR	P54802	N-Term(Dimethyl)	2212.15	1.64402	2.10275	0.786589	0	0
DTNGENIAESLVAEGLATR	Q7KZF4	N-Term(Dimethyl)	1987.99	1.07591	1.03837	1.04244	0	0
AVHANPPTLLLPVAHMLEVGDPDDLAFLRK	Q13724	N-Term(Dimethyl); K30(Dimethyl)	3305.8	1.05558	1.28046	0.829382	0	1
AYPDVAALSDGYWVVSNR	O14773	N-Term(Dimethyl)	2010.99	1.4484	1.97845	0.736534	0	0
IASIKPVISETPLPVDLYR	H7BYZ1	N-Term(Dimethyl); K5(Dimethyl)	2167.26	0.861437	0.611443	1.41741	0	0
LVKPGNQNTQVTEAWNK	Q9UQ80	N-Term(Dimethyl); K3(Dimethyl); K17(Dimethyl)	2011.09	0.76718	0.78191	0.987116	0	0
SLLLTTIPQIGSTEWSETLHNLK	Q13126	N-Term(Dimethyl); K23(Dimethyl)	2637.44	1.59212	2.85335	0.56137	0	0
SLDLFNCEVTNLNDYR	Q92688;H0YN26	N-Term(Dimethyl); C7(Carbamidomethyl)	2000.93				0	0
QLFHPEQLITGKEDAANNYAR	P68363;Q9BQE3;F8VQQ4	N-Term(Dimethyl); K12(Dimethyl); N17(Deamidated)	2472.24				0	1
DSIFSNLTGQLDYQGFEK	P40939	N-Term(Dimethyl); K18(Dimethyl)	2118.04	0.845802	0.745385	1.14161	0	0
SIFSGIGSTAEPVSQSTTSDYQWDVSR	Q86UE4	N-Term(Dimethyl)	2933.38				0	0
TSVQTEDDQLIAGQSAR	P35221	N-Term(Dimethyl)	1846.91	1.07684	0.962401	1.1257	0	0
ALQSGQCAGAALDVFTEEPPRDR	O43175	N-Term(Dimethyl); C7(Carbamidomethyl)	2516.22				0	1
REPWLLPSQHNDIIR	Q14697;E9PKU7	N-Term(Dimethyl)	1902.03				0	1
GQYFGELALVTNKPR	P31323;P13861	N-Term(Dimethyl); K13(Dimethyl)	1748.97				0	0
AGAGAPVVGSGSSGGGNAFTGLGPVSTLPSLHGK	E9PDU5	N-Term(Dimethyl); K34(Dimethyl)	3020.57	1.1364	1.15812	0.987202	0	0
HWPFMVVNDAGRPK	P11142	N-Term(Dimethyl); K14(Dimethyl)	1709.89	3.16946			0	0
CLELFSELAEDKENYKK	P08238	N-Term(Dimethyl); C1(Carbamidomethyl); K12(Dimethyl); K16(Dimethyl); K17(Dimethyl)	2228.15				0	2
TTGIVMDSGDGVTHTVPIYEGYALPHAILR	P60709;I3L4N8	N-Term(Dimethyl); M6(Oxidation)	3227.63				0	0
QEYDESGPSIVHRK	P0CG39;P0CG38;P60709;A5A3E0	N-Term(Dimethyl); K14(Dimethyl)	1700.85				0	1
EGILNDDIYCPPETAVLLASYAVQSK	P26038	N-Term(Dimethyl); C10(Carbamidomethyl); K26(Dimethyl)	2922.47	0.941706	1.25546	0.732099	0	0
NALNIGMVEEVLQSSDETK	Q9NTX5	N-Term(Dimethyl); K19(Dimethyl)	2133.07				0	0
INSGGKLPNFGFVVFDDSEPVQK	Q13283	N-Term(Dimethyl); K6(Dimethyl); K23(Dimethyl)	2578.35	0.928323	1.07871	0.86581	0	1
SLVESVSSSPNKESNEEEQVWHFLGK	Q9H2U2	N-Term(Dimethyl); K12(Dimethyl); K26(Dimethyl)	3030.5	1.12949	0.886271	1.28217	0	1
QITSYGETCPGLEQYAIK	P50990	N-Term(Dimethyl); C9(Carbamidomethyl); K18(Dimethyl)	2114.04	1.02414	1.00835	1.02183	0	0
LESLSAATTFEPLEPVKDTDIQGFLK	Q8N1F7	N-Term(Dimethyl); K17(Dimethyl); K26(Dimethyl)	2933.58				0	1
SHMSGSPGPGGSNTAPSTPVIGGSDKPGMEEK	H7BXI1	N-Term(Dimethyl); K26(Dimethyl); K32(Dimethyl)	3137.48	1.10972	0.943155	1.18374	0	0
FHDFLGDSWGILFSHPR	P30041	N-Term(Dimethyl)	2059.01	1.43593	2.86719	0.503853	0	0
DAFDTLFDHAPDKLNVVK	Q9NVD7	N-Term(Dimethyl); K13(Dimethyl); K18(Dimethyl)	2129.12				0	1
TGQATVASGIPAGWMGLDCGPESSKK	P00558	N-Term(Dimethyl); M15(Oxidation); C19(Carbamidomethyl); K25(Dimethyl); K26(Dimethyl)	2705.33				0	1
FVNLGIEPPKGVLLFGPPGTGK	P35998	N-Term(Dimethyl); K10(Dimethyl); K22(Dimethyl)	2321.35	0.964803	0.99567	0.974879	0	1
ARPILHVSHEVSIAPR	J3KNV4	N-Term(Dimethyl)	1810.04	0.821711	1.01583	0.813818	0	0
NTIEMQAITALAHLR	Q9BZE4	N-Term(Dimethyl)	1709.93	0.790639	0.481944	1.65048	0	0
AGTQIENIDEDFRDGLK	O43707	N-Term(Dimethyl); K17(Dimethyl)	1976.99			0.793227	0	1
GYWAGLDASAQTTSHELTIPNDLIGCIIGR	F8VRH0;F8VZX2	N-Term(Dimethyl); C26(Carbamidomethyl)	3257.62				0	0
VALVTFNSAAHNKPSLIR	Q86VP6	N-Term(Dimethyl); K13(Dimethyl)	1994.15	1.00485	1.25326	0.806655	0	0
GMLKDNAMLEYLK	E7EQR4	N-Term(Dimethyl); K4(Dimethyl); K13(Dimethyl)	1609.86	0.830579	0.941085	0.887932	0	1
LGHVVMGNNAVSPYQQVIEK	P60228	N-Term(Dimethyl); K20(Dimethyl)	2239.18	0.783385	0.776966	1.01438	0	0
TIIGSFNGALAAVPVQDLGSTVIK	Q9BWD1	N-Term(Dimethyl); K24(Dimethyl)	2427.38				0	0
QELSHALYQHDAACR	Q9UMS4	N-Term(Dimethyl); C14(Carbamidomethyl)	1826.85	1.09119	1.11835	0.981635	0	0
GPIKFNVWDTAGQEK	P62826	N-Term(Dimethyl); K4(Dimethyl); K15(Dimethyl)	1773.95	0.821527	1.02207	0.808668	0	1
AVLASMDNENMHTPDIGGQGTTSEAIQDVIR	P51553	N-Term(Dimethyl); N10(Deamidated)	3299.56				0	0
NIYGNIEDLVVHIK	O00116	N-Term(Dimethyl); K14(Dimethyl)	1682.94	0.745908	0.70588	1.04741	0	0
HTDNVIQWLNAMDEIGLPK	P46940	N-Term(Dimethyl); K19(Dimethyl)	2250.14				0	0
DAALAVAEAMADKAELEK	P46060	N-Term(Dimethyl); K13(Dimethyl); K18(Dimethyl)	1930.02	0.96606	0.936108	1.03826	0	1
EDLHILFSNHGEIK	P05455	N-Term(Dimethyl); K14(Dimethyl)	1707.9	3.28981	3.78482	0.874485	0	0
NHQEEDLTEFLCANHVLK	Q9BT09	N-Term(Dimethyl); C12(Carbamidomethyl); K18(Dimethyl)	2253.09	1.21742	1.26687	0.9668	0	0
GSYGDLGGPIITTQVTIPK	P61978;Q5T6W2	N-Term(Dimethyl); K19(Dimethyl)	1973.08				0	0
CEVNGAGAHPLFAFLR	A0A087WUQ6	N-Term(Dimethyl); C1(Carbamidomethyl)	1786.9			0.988184	0	0
AVVTHSSGNHGQALTYAAK	Q9GZT4	N-Term(Dimethyl); K19(Dimethyl)	1968.02	1.09702	1.14134	0.967003	0	0
AEGSDVANAVLDGADCIMLSGETAK	P14618;H3BR70	N-Term(Dimethyl); C16(Carbamidomethyl); M18(Oxidation); K25(Dimethyl)	2566.18				0	0
VHSPSGALEECYVTEIDQDKYAVR	P21333	N-Term(Dimethyl); C11(Carbamidomethyl); K20(Dimethyl)	2822.35				0	1
LFTAHNNMTNYATVWASK	Q08211	N-Term(Dimethyl); K18(Dimethyl)	2125.05			0.905693	0	0
SCSGVEFSTSGHAYTDTGK	Q9Y277	N-Term(Dimethyl); C2(Carbamidomethyl); K19(Dimethyl)	2046.9	0.87573	0.811152	1.08616	0	0
VILQDFTGVPAVVDFAAMR	P21399	N-Term(Dimethyl)	2077.11	0.709982	0.542477	1.31672	0	0
LKPDEGGEVPVLNVSYKPQK	P61221	N-Term(Dimethyl); K2(Dimethyl); K17(Dimethyl); K20(Dimethyl)	2309.31	0.824042	0.801538	1.03431	0	0
GAFNFDQETVINPETGEQIQSWYR	Q9NY33	N-Term(Dimethyl)	2857.34	1.21038	1.05829	1.15066	0	0
SIQEIQELDKDDESLRK	P52565	N-Term(Dimethyl); K10(Dimethyl); K17(Dimethyl)	2130.12			0.894402	0	2
LLGTIYTAAEEIEAVGGK	Q6YN16	N-Term(Dimethyl); K18(Dimethyl)	1891.04	0.836852	0.669765	1.25705	0	0
NEDIPNVAVYPHNGMIDLK	P54709	N-Term(Dimethyl); K19(Dimethyl)	2195.11	0.962975	1.27868	0.75767	0	0
NEDEDSPNKLYTLVTYVPVTTFK	H7C2W9	N-Term(Dimethyl); K9(Dimethyl); K23(Dimethyl)	2757.41	0.724647	1.14576	0.636297	0	1
LQISHEAAACITGLR	Q08211	N-Term(Dimethyl); C10(Carbamidomethyl)	1667.88	1.0208	0.963866	1.0655	0	0
GADFLVTEVENGGSLGSKK	P14618	N-Term(Dimethyl); N11(Deamidated); K18(Dimethyl); K19(Dimethyl)	1993.04	0.91492	1.63087	0.564407	0	1
GNEFFCEVDEDYIQDKFNLTGLNEQVPHYR	P67870	N-Term(Dimethyl); C6(Carbamidomethyl); K16(Dimethyl)	3732.7	1.23634	1.1931	1.04253	0	1
LNEHFLNTTDFLDTIK	P48735	N-Term(Dimethyl); K16(Dimethyl)	1977.03	0.831781	0.932644	0.897265	0	0
FLEVIKPFCVILPEIQKPER	P61619	N-Term(Dimethyl); K6(Dimethyl); C9(Carbamidomethyl); K17(Dimethyl)	2539.46	1.06165	1.22503	0.871895	0	0
NHGVVMPDANKENTLNQLVGAAFGAAGQR	Q02252	N-Term(Dimethyl); K11(Dimethyl)	3035.54	0.813895	0.850371	0.962914	0	1
EFNEEGALSVLQQFK	O43390	N-Term(Dimethyl); K15(Dimethyl)	1794.92	0.866804	0.771614	1.13018	0	0
CEHDGVMTGANGEVSFINIK	O15371	N-Term(Dimethyl); C1(Carbamidomethyl); K20(Dimethyl)	2234.05	0.944103	0.939216	1.0113	0	0
FFLQGIQLNTILPDAR	P11279	N-Term(Dimethyl)	1874.05	1.06628	0.903441	1.1874	0	0
NDLSICGTLHSVDQYLNIK	Q9Y333	N-Term(Dimethyl); C6(Carbamidomethyl); K19(Dimethyl)	2246.14	1.2668			0	0
GESDPAYQQYQDAANNLR	P13667	N-Term(Dimethyl)	2067.93				0	0
VINEPTAAALAYGLDKSEDK	P38646	N-Term(Dimethyl); K16(Dimethyl); K20(Dimethyl)	2189.16				0	1
RWLLLCNPGLADTIVEK	P11216	N-Term(Dimethyl); C6(Carbamidomethyl); K17(Dimethyl)	2054.15	0.974422	1.07539	0.911608	0	1
NTNDANSCQIIIPQNQVNRK	P50395;P31150	N-Term(Dimethyl); C8(Carbamidomethyl); K20(Dimethyl)	2383.21				0	1
SASYTVSTISDGPGYSHDCPSEHLNGK	Q16602	N-Term(Dimethyl); C19(Carbamidomethyl); K27(Dimethyl)	2922.3	1.28804	1.9211	0.674538	0	0
APQLLIAPFKEEDEWDSPHIVR	O15460	N-Term(Dimethyl); K10(Dimethyl)	2646.38				0	1
DGVADVSIEDSVISLSGDHCIIGR	P00441	N-Term(Dimethyl); C20(Carbamidomethyl)	2542.24	1.60172	1.23618	1.30356	0	0
CSDAAGYPHATHDLEGPPLDAYSIQGQHTISPLDLAK	Q15365	N-Term(Dimethyl); C1(Carbamidomethyl); K37(Dimethyl)	4001.93				0	0
VTVNTNMVDLNDYLQHILK	P53618	N-Term(Dimethyl); K19(Dimethyl)	2286.2				0	0
VYVIEPHSMEFAPCQVEAR	Q8TEM1	N-Term(Dimethyl); C14(Carbamidomethyl)	2290.09				0	0
EQQHVMEELFQSSFR	P78527	N-Term(Dimethyl)	1922.9	0.810929	0.89749	0.909035	0	0
GISEETTTGVHNLYK	P23526	N-Term(Dimethyl); K15(Dimethyl)	1704.87	0.9379	0.997996	0.945487	0	0
GLAPDLPEDLYHLIK	P62277	N-Term(Dimethyl); K15(Dimethyl)	1749.97				0	0
GGPNIITLADIVKDPVSR	E7EU96	N-Term(Dimethyl); K13(Dimethyl)	1921.11				0	1
VDLNSNGFICDYELHELFK	P13797	N-Term(Dimethyl); N6(Deamidated); C10(Carbamidomethyl); K19(Dimethyl)	2370.12				0	0
VSQGSKDPAEGDGAQPEETPR	Q14697	N-Term(Dimethyl); K6(Dimethyl)	2211.04	1.03594	1.11672	0.933925	0	1
VLECLASGIVMPDGSGIYDPCEK	Q12906	N-Term(Dimethyl); C4(Carbamidomethyl); C21(Carbamidomethyl); K23(Dimethyl)	2566.22	0.846975	0.983878	0.866078	0	0
FQGQTCEMCQTCLGVCAEHK	P05556	N-Term(Dimethyl); C6(Carbamidomethyl); C9(Carbamidomethyl); C12(Carbamidomethyl); C16(Carbamidomethyl); K20(Dimethyl)	2500.05				0	0
TLQALEFHTVPFQLLAR	Q08380	N-Term(Dimethyl)	2012.13	1.93883	2.58313	0.755128	0	0
IMEFTTTLLNTSPEGWK	P78527	N-Term(Dimethyl); K17(Dimethyl)	2024.04	0.970191	0.753419	1.29553	0	0
FFTGDVFGYHGYTFANLGEHEFVEEK	Q9UBE0	N-Term(Dimethyl); K26(Dimethyl)	3096.43	1.27236	1.72293	0.742966	0	0
GHSTCLSEGALSPDGTVLATASHDGYVK	Q6P2E9	N-Term(Dimethyl); C5(Carbamidomethyl); K28(Dimethyl)	2886.38	0.798235	0.831934	0.965317	0	0
ENPSATLEDLEKPGVDEEPQHVLLR	Q92900	N-Term(Dimethyl); K12(Dimethyl)	2871.47	1.0898	0.916996	1.19565	0	0
GDVEEDETIPDSEQDIRPR	Q92973	N-Term(Dimethyl)	2228.03	1.09007	1.03387	1.06076	0	0
FGQAATMEGIGAIGGTPPAFNR	Q15233	N-Term(Dimethyl)	2191.09	1.48378			0	0
THFFLNAGNLCNLNYGEGPK	Q9Y512	N-Term(Dimethyl); C11(Carbamidomethyl); K20(Dimethyl)	2322.13	0.948451	1.00544	0.949046	0	0
AFGFSHLEALLDDSK	Q96FW1	N-Term(Dimethyl); K15(Dimethyl)	1705.87	1.09876	1.39155	0.794389	0	0
LFQLMVEHTPDEESIDWTK	Q12907	N-Term(Dimethyl); K19(Dimethyl)	2374.16				0	0
IYITLTGVHQVPTENVQVHFTER	Q9HB71	N-Term(Dimethyl)	2709.43	1.1252	1.08683	1.04158	0	0
HYSDELQSVISHLLR	O95219	N-Term(Dimethyl)	1824.96	0.968393	1.32064	0.737724	0	0
MAVTFIGNSTAIQELFK	P07437	N-Term(Dimethyl); K17(Dimethyl)	1926.03	1.02476	1.23256	0.93277	0	0
GPSGQGQGQFLIQQVTLK	Q13724	N-Term(Dimethyl); K18(Dimethyl)	1942.07	1.33101	1.31345	1.01952	0	0
LLQTAATAAQQGGQANHPTAAVVTEK	P40763	N-Term(Dimethyl); K26(Dimethyl)	2632.41	1.1994	1.48284	0.813763	0	0
LAWVSHDSTVSVADASK	Q92747	N-Term(Dimethyl); K17(Dimethyl)	1828.94	0.816984	0.989361	0.83078	0	0
LQALANEQAAAAHELEK	Q86UP2	N-Term(Dimethyl); K17(Dimethyl)	1862.99	1.02718	1.60728	0.642962	0	0
TAAANAAAGAAENAFR	O14828	N-Term(Dimethyl)	1504.75				0	0
SIYGEKFEDENFILK	P62937	N-Term(Dimethyl); K6(Dimethyl); K15(Dimethyl)	1916	0.969566	1.03811	0.956689	0	1
AGSKPPSCPAPGPTGAASIVPSVPGMALDLSQIPTK	Q9Y6K5	N-Term(Dimethyl); K4(Dimethyl); C8(Carbamidomethyl); K36(Dimethyl)	3540.88				0	0
EIVHIQAGQCGNQIGAK	Q9BVA1;Q13885;P07437;Q13509;P68371;P04350	N-Term(Dimethyl); C10(Carbamidomethyl); N12(Deamidated); K17(Dimethyl)	1879.96				0	0
TIAVDFASEDIYDKIK	Q53GQ0	N-Term(Dimethyl); K14(Dimethyl); K16(Dimethyl)	1912.03				0	1
SGDPMILSCLMEHLYTEK	Q92896	N-Term(Dimethyl); C9(Carbamidomethyl); K18(Dimethyl)	2180.03				0	0
LKQEYFVVAATLQDIIR	P06737;P11216	N-Term(Dimethyl); K2(Dimethyl)	2063.18				0	1
TEAEIAHIALETLEGHQR	O75955	N-Term(Dimethyl)	2046.05				0	0
CNEIINWLDKNQTAEKEEFEHQQK	P11142	N-Term(Dimethyl); C1(Carbamidomethyl); K10(Dimethyl); K16(Dimethyl); K24(Dimethyl)	3143.53			0.231845	0	2
HLLSLMGIPYLDAPSEAEASCAALVK	P39748	N-Term(Dimethyl); C21(Carbamidomethyl); K26(Dimethyl)	2812.45	0.746356	0.819432	0.916349	0	0
CSDSTLLSNLLEEMK	O14617	N-Term(Dimethyl); C1(Carbamidomethyl); K15(Dimethyl)	1795.88	1.14515	1.08328	1.06353	0	0
ADLQNHLDTAQNALQDK	Q15075	N-Term(Dimethyl); K17(Dimethyl)	1950.98			0.861461	0	0
IGEHTPSALAIMENANVLAR	P04075	N-Term(Dimethyl); N14(Deamidated)	2136.11	1.09978	1.32599	0.834438	0	0
EGAAHAFAQYNLDQFTPVK	P47755	N-Term(Dimethyl); K19(Dimethyl)	2163.08	0.956795	1.54419	0.623371	0	0
VTTVASHTSDSDVPSGVTEVVVK	P10909	N-Term(Dimethyl); K23(Dimethyl)	2370.24	1.38699	1.28766	1.08367	0	0
LSELDDRADALQAGASQFETSAAK	J3QRU4;Q15836	N-Term(Dimethyl); K24(Dimethyl)	2550.26				0	1
AIGISNFNHLQVEMILNKPGLK	P15121	N-Term(Dimethyl); K18(Dimethyl); K22(Dimethyl)	2520.44				0	0
EISEVFPDQFIHLGGDEVEFK	P07686	N-Term(Dimethyl); K21(Dimethyl)	2491.23				0	0
MQQQLDEYQELLDIK	P02545	N-Term(Dimethyl); K15(Dimethyl)	1949.98	0.967185	0.876602	1.11003	0	0
ISQMPVILTPLHFDRDPLQK	P49915	N-Term(Dimethyl); K20(Dimethyl)	2404.33	1.38139	1.05844	1.31303	0	1
GPVTDVAYSHDGAFLAVCDASK	O75083	N-Term(Dimethyl); C18(Carbamidomethyl); K22(Dimethyl)	2336.11	1.19677	1.24567	0.966576	0	0
CEEGQCVCDEGFAGVDCSEKR	P24821;J3QSU6	N-Term(Dimethyl); C1(Carbamidomethyl); C6(Carbamidomethyl); C8(Carbamidomethyl); C17(Carbamidomethyl); K20(Dimethyl)	2548.01				0	1
VPADTEVVCAPPTAYIDFAR	P60174	N-Term(Dimethyl); C9(Carbamidomethyl)	2220.1	1.38129	1.56356	0.888786	0	0
SQDHFHVFVGDLSPEITTEDIK	F8W8I6	N-Term(Dimethyl); K22(Dimethyl)	2570.26	0.865036	0.848379	1.02582	0	0
EAGEGGEAEAPAAEGGK	A0A087WZH7	N-Term(Dimethyl); K17(Dimethyl)	1585.73	0.972292	0.595826	1.64174	0	0
LQDAFSSIGQSCHLDLPQIAVVGGQSAGK	P50570	N-Term(Dimethyl); C12(Carbamidomethyl); K29(Dimethyl)	3039.55	0.621304	0.540153	1.15722	0	0
ELDPTNMTYITNQAAVYFEK	P31948	N-Term(Dimethyl); K20(Dimethyl)	2404.17				0	0
LGAVFNQVAFPLQYTPR	Q15393	N-Term(Dimethyl)	1949.06				0	0
CVHIWNTQTGALVHSYR	Q9BZK7	N-Term(Dimethyl); C1(Carbamidomethyl)	2070.03	1.14633	1.39642	0.825893	0	0
SDALETLGFLNHYQMK	P14866	N-Term(Dimethyl); N11(Deamidated); K16(Dimethyl)	1923.95				0	0
VTYLVHNFEEGGGVAMGMYNQDK	O75874	N-Term(Dimethyl); K23(Dimethyl)	2615.22				0	0
CLELFTELAEDKENYKK	P07900	N-Term(Dimethyl); C1(Carbamidomethyl); K12(Dimethyl); K16(Dimethyl); K17(Dimethyl)	2242.16				0	2
NLVDFLTGEEVVCHVAR	Q9H9J2	N-Term(Dimethyl); C13(Carbamidomethyl)	1986				0	0
EKFGAVFLWDSGSSVGEITGHNK	O75083	N-Term(Dimethyl); K2(Dimethyl); K23(Dimethyl)	2549.3	0.527826	0.696846	0.762047	0	1
GEMSRPGEVCSALNLCESLQK	P07602	N-Term(Dimethyl); C10(Carbamidomethyl); C16(Carbamidomethyl); K21(Dimethyl)	2421.15	0.731512	0.983355	0.748408	0	0
QLVFHIGHGDLGSPAVLVSR	O95479	N-Term(Dimethyl)	2130.17				0	0
DFLGEASIMGQFDHPNIIR	P29320	N-Term(Dimethyl)	2188.07				0	0
GSLDPESIFEMMETGKR	Q15024	N-Term(Dimethyl); K16(Dimethyl)	1982.95	1.00706	0.943394	1.07397	0	1
AISPDKDNFYFDVKDDFDFGTMGHVIR	Q13423	N-Term(Dimethyl); K6(Dimethyl); K14(Dimethyl)	3233.55	1.10637	1.16471	0.955675	0	2
AFVFDVIHEGCLVTPPELLR	Q9UKG9	N-Term(Dimethyl); C11(Carbamidomethyl)	2340.24	1.0647	1.36947	0.782172	0	0
AQDPSEVLTMLTNETGFEISSSDATVK	B4DY09	N-Term(Dimethyl); N13(Deamidated); K27(Dimethyl)	2927.43				0	0
ILWQGTEDLSVPGVEHEAR	O43924	N-Term(Dimethyl)	2164.09	1.17845	1.16412	1.01845	0	0
ANDYANAVLQALSNVPPLR	A0A087X1B2	N-Term(Dimethyl)	2054.09				0	0
APEAWDYGQGFVNEEMIR	P00387	N-Term(Dimethyl)	2139.97	1.57038	0.983088	1.60709	0	0
YRPQTLNDLISHQDILSTIQK	P40937	N-Term(Dimethyl); K21(Dimethyl)	2539.38	0.792911	0.643875	1.23894	0	0
GISEDSHLESLQDVGQSAAPTFMISPETVTGTGK	P27816	N-Term(Dimethyl); K34(Dimethyl)	3545.71	0.902156	1.46857	0.618037	0	0
LEAQHQALVTLWHQLHVDMK	Q15149	N-Term(Dimethyl); K20(Dimethyl)	2453.31	1.14557	0.973138	1.18433	0	0
SIQEIQELDKDDESLR	P52565	N-Term(Dimethyl); K10(Dimethyl)	1974	1.25867	1.51658	0.806341	0	1
SNPSEVVEFTTCPDKPGIPVKPSVK	Q9Y2H6	N-Term(Dimethyl); C12(Carbamidomethyl); K15(Dimethyl); K21(Dimethyl); K25(Dimethyl)	2824.51	2.79689			0	0
AGQQGLSVAFDLATHR	P22033	N-Term(Dimethyl)	1698.88	0.992293	1.36261	0.732648	0	0
GSGDPSSSSSSGNPLVYLDVDANGKPLGR	P30405	N-Term(Dimethyl); K25(Dimethyl)	2889.42				0	0
VQASLAANTFTITGHAETK	P20290	N-Term(Dimethyl); K19(Dimethyl)	2016.07	0.898413	0.957952	0.943539	0	0
CFSIDNPGYEPEVVAVHPGGDTVAIGGVDGNVR	O75083	N-Term(Dimethyl); C1(Carbamidomethyl)	3425.63	1.12513	0.933702	1.21233	0	0
YLLQYQEPIPCEQLVTALCDIK	P25789	N-Term(Dimethyl); C11(Carbamidomethyl); C19(Carbamidomethyl); K22(Dimethyl)	2750.41				0	0
VADGMVFGALLPCEECSGQLVFK	P09874	N-Term(Dimethyl); C13(Carbamidomethyl); C16(Carbamidomethyl); K23(Dimethyl)	2583.25	0.913899	0.964269	0.953516	0	0
IEWLESHQDADIEDFKAK	P11021	N-Term(Dimethyl); K16(Dimethyl); K18(Dimethyl)	2258.13	1.15001	1.06726	1.08408	0	1
CSEGVFLLTTTPRPVIVEPLEQLDDEDGLPEK	P23246	N-Term(Dimethyl); C1(Carbamidomethyl); K32(Dimethyl)	3652.86	0.932446	1.00046	0.93767	0	0
LKEADEMHTLLQLECEK	Q86UP2	N-Term(Dimethyl); K2(Dimethyl); C15(Carbamidomethyl); K17(Dimethyl)	2171.11	0.792402	0.88361	0.902221	0	1
ALKDENLPPVICQDVENLQK	Q5JRG1	N-Term(Dimethyl); K3(Dimethyl); C12(Carbamidomethyl); K20(Dimethyl)	2407.28	2.13772			0	1
FVHTSVHGVGHSFVQSAFK	Q96G03	N-Term(Dimethyl); K19(Dimethyl)	2127.11	1.25609	1.37604	0.918368	0	0
LEESSNNLTQFQTVEAQLK	E9PHM6;Q03001	N-Term(Dimethyl); K19(Dimethyl)	2235.15				0	0
SAAMLGNSEDHTALSR	O60749	N-Term(Dimethyl)	1687.8	0.981634	1.2961	0.761969	0	0
EGPYSISVLYGDEEVPR	P21333	N-Term(Dimethyl)	1937.94	1.32613	0.760591	1.19097	0	0
LAQQQAAAAAAAAAAASQQGSAK	Q9BZK7	N-Term(Dimethyl); K23(Dimethyl)	2111.12	1.42922	1.28159	1.12196	0	0
AGDWQCPNPGCGNQNFAWR	B0QYK0	N-Term(Dimethyl); C6(Carbamidomethyl); C11(Carbamidomethyl)	2262.95	1.09659	1.14778	0.961198	0	0
EDGNEEDKENQGDETQGQQPPQRR	P67809	N-Term(Dimethyl); K8(Dimethyl)	2840.26	0.885947	0.861834	1.02854	0	2
GHYTEGAELVDAVLDVVR	Q9BUF5;P04350	N-Term(Dimethyl)	1971.01				0	0
FIQENIFGICPHMTEDNK	P30101	N-Term(Dimethyl); C10(Carbamidomethyl); K18(Dimethyl)	2249.06	1.75754	2.11742	0.772113	0	0
SDGLQWSAEQPCNPSKPK	Q9NUQ6	N-Term(Dimethyl); C12(Carbamidomethyl); K16(Dimethyl); K18(Dimethyl)	2113.03	1.52704	1.39924	1.09796	0	0
GPSLNPVLDYDHGSR	P43243	N-Term(Dimethyl)	1654.81			1.09091	0	0
GQCDLELINVCNENSLFK	Q00610	N-Term(Dimethyl); C3(Carbamidomethyl); C11(Carbamidomethyl); K18(Dimethyl)	2209.06				0	0
VEAEGLAALHSLTACLSR	Q96T76	N-Term(Dimethyl); C15(Carbamidomethyl)	1926.01	1.17699	1.51477	0.781724	0	0
QLHQSCQTDDGEDDLKK	P61201	N-Term(Dimethyl); C6(Carbamidomethyl); K16(Dimethyl); K17(Dimethyl)	2100.98			1.15178	0	1
QLASGLLLVTGPLVLNR	Q02878	N-Term(Dimethyl)	1792.1	1.07147	1.42646	0.755696	0	0
GFGFVTYATVEEVDAAMNARPHK	F8W6I7	N-Term(Dimethyl); K23(Dimethyl)	2566.27	0.992622	1.07178	0.931764	0	0
HAMNLEAVNTYEGTHDIHALILGR	Q92947	N-Term(Dimethyl)	2703.36	1.15517	0.937216	1.24004	0	0
VATAQDDITGDGTTSNVLIIGELLK	P40227	N-Term(Dimethyl); N16(Deamidated); K25(Dimethyl)	2601.4				0	0
LTTPTYGDLNHLVSATMSGVTTCLR	Q9BVA1;Q13885;P07437;P68371;P04350	N-Term(Dimethyl); N10(Deamidated); C23(Carbamidomethyl)	2737.34				0	0
ALPDMEVVGLNFSSATTPELLLK	Q14204	N-Term(Dimethyl); K23(Dimethyl)	2501.35				0	0
SLLHMISNDIGQLACLHAR	Q9NVE7	N-Term(Dimethyl); C15(Carbamidomethyl)	2177.13	1.12095	0.98714	1.14244	0	0
GSTIETEQKEDKGEDSEPVTSK	Q8N8S7	N-Term(Dimethyl); K9(Dimethyl); K12(Dimethyl); K22(Dimethyl)	2506.24			1.56053	0	2
AILFSQPLQITDTQQGCIAPVELR	Q8NBF2	N-Term(Dimethyl); C17(Carbamidomethyl)	2726.45	1.2299	1.23289	1.00363	0	0
DHASIQMNVAEVDKVTGR	Q8WVC2	N-Term(Dimethyl); K14(Dimethyl)	2026.03				0	1
ATLPVFDKEELLECIQQLVK	P54687	N-Term(Dimethyl); K8(Dimethyl); C14(Carbamidomethyl); K20(Dimethyl)	2457.36				0	1
ICPVETLVEEAIQCAEK	P30084	N-Term(Dimethyl); C2(Carbamidomethyl); C14(Carbamidomethyl); K17(Dimethyl)	2045.02	0.904277	1.06314	0.855735	0	0
AVCMLSNTTAIAEAWAR	P68363	N-Term(Dimethyl); C3(Carbamidomethyl)	1892.93	0.996617	1.2108	0.848779	0	0
VVVPIYCTSFLAVEEDKQQK	Q8IWX8	N-Term(Dimethyl); C7(Carbamidomethyl); K17(Dimethyl); K20(Dimethyl)	2437.3	0.903362	0.907418	1.00157	0	1
TCSPASLSQASADLEATLR	Q14258	N-Term(Dimethyl); C2(Carbamidomethyl)	2005.98	1.47691	1.67372	0.887767	0	0
LLGGVTIAQGGVLPNIQAVLLPK	Q8IUE6	N-Term(Dimethyl); K23(Dimethyl)	2327.44				0	0
GNKEPNPMVQLSIQDVTQESK	Q9BSJ8	N-Term(Dimethyl); K3(Dimethyl); K21(Dimethyl)	2426.27	0.840152	1.15089	0.734435	0	1
LGFDISEQEVTAPAPAACQILK	Q9H008	N-Term(Dimethyl); C18(Carbamidomethyl); K22(Dimethyl)	2414.25				0	0
QVVDCQLADVNNIGK	P28838	N-Term(Dimethyl); C5(Carbamidomethyl); K15(Dimethyl)	1728.9	1.64219	1.91181	0.864182	0	0
VDISAPDVDVHGPDWHLK	Q09666	N-Term(Dimethyl); K18(Dimethyl)	2056.05				0	0
ISPEQHWDFTAEDLKDLGEIGR	P45985	N-Term(Dimethyl); K15(Dimethyl)	2612.3	1.41797	1.53823	0.927414	0	1
TLMELLNQMDGFDTLHR	P62333	N-Term(Dimethyl)	2062	0.997401	0.976902	1.02718	0	0
GFCFITYTDEEPVKK	A0A087WUK2	N-Term(Dimethyl); C3(Carbamidomethyl); K14(Dimethyl); K15(Dimethyl)	1917.96				0	1
VDKAAAAAAALQAK	P36578	N-Term(Dimethyl); K3(Dimethyl); K14(Dimethyl)	1382.83	0.961347	0.76865	1.25829	0	1
VNFPENGFLSPDKLSLLEK	P31689	N-Term(Dimethyl); K13(Dimethyl); K19(Dimethyl)	2231.23	0.98708			0	1
TPELNLDQFHDKTPYTIMFGPDK	P27824	N-Term(Dimethyl); K12(Dimethyl); K23(Dimethyl)	2791.39				0	1
SVLLLAYKPMEGNFEEIAR	Q16531	N-Term(Dimethyl); K8(Dimethyl)	2236.2				0	0
VQLDTIQGELNAPTQFK	Q7Z3B4	N-Term(Dimethyl); K17(Dimethyl)	1958.05	1.43911	1.04953	1.37951	0	0
VIDLPGGGAAFVMEHLK	Q9H479	N-Term(Dimethyl); K17(Dimethyl)	1809.99				0	0
RKDPELWGSVLLESNPYR	Q00610	N-Term(Dimethyl); K2(Dimethyl)	2215.18	0.995782	1.06399	0.941571	0	2
STLINSLFLTDLYPER	Q15019	N-Term(Dimethyl)	1910.02				0	0
QLAPGMVQQMQSVCSDCNGEGEVINEK	O60884	N-Term(Dimethyl); C14(Carbamidomethyl); C17(Carbamidomethyl); K27(Dimethyl)	3064.37				0	0
HHAAYVNNLNVTEEKYQEALAK	A0A0C4DFU2	N-Term(Dimethyl); K15(Dimethyl); K22(Dimethyl)	2626.36				0	1
FDDPGLMLMGFKPLVLLK	P12956	N-Term(Dimethyl); K12(Dimethyl); K18(Dimethyl)	2118.2	0.945373	1.09669	0.867252	0	0
RGFGFVTFDDHDPVDKIVLQK	P22626	N-Term(Dimethyl); K16(Dimethyl); K21(Dimethyl)	2517.34				0	2
GLLSDSMTDVPVDTGVAAR	O43399	N-Term(Dimethyl)	1931.97	0.967459	0.814087	0.641979	0	0
TFVNITPAEVGVLVGK	P07737	N-Term(Dimethyl); K16(Dimethyl)	1699.99	1.0064	1.11217	0.910384	0	0
NLFAEIIEEHLANR	Q9NWY4	N-Term(Dimethyl)	1696.9	1.09778	1.02064	1.08212	0	0
VNIEGGAIALGHPLGASGCR	Q9BWD1	N-Term(Dimethyl); C19(Carbamidomethyl)	1977.03	0.803	0.682592	1.18354	0	0
GKNPEDLIWHTPEGISIKPLYSK	P22033	N-Term(Dimethyl); K2(Dimethyl); K18(Dimethyl); K23(Dimethyl)	2734.51	0.975253	0.92427	1.06156	0	1
NLINATNAALQTPLHVAAR	O15084	N-Term(Dimethyl)	2016.14	0.945631	0.770615	1.23456	0	0
TRPVVAAGAVGLAQR	B7Z9I1	N-Term(Dimethyl)	1493.89				0	0
SKCEELSGLHGQLQEAR	A0A0A0MRV0	N-Term(Dimethyl); K2(Dimethyl); C3(Carbamidomethyl)	1998	1.3381	1.4637	1.15155	0	1
IFCVHGGLSPSIQTLDQIR	H3BTA2	N-Term(Dimethyl); C3(Carbamidomethyl)	2169.13	1.03628	0.903755	1.15359	0	0
GKLPIVNEDDELVAIIAR	P12268	N-Term(Dimethyl); K2(Dimethyl)	2021.16				0	1
RAEISNAIDQYVTGTIGEDEDLIK	P31939	N-Term(Dimethyl); K24(Dimethyl)	2706.37	1.16973	1.08645	1.08319	0	1
AGAIAPCEVTVPAQNTGLGPEK	P05388	N-Term(Dimethyl); C7(Carbamidomethyl); K22(Dimethyl)	2236.16	0.858291	0.758584	1.1383	0	0
LGDLWTLDIDTLTWNKPSLSGVAPLPR	P51610	N-Term(Dimethyl); K16(Dimethyl)	3034.67	1.09629	2.00549	0.549959	0	0
TIVEMENSGLVHMLK	Q13618	N-Term(Dimethyl); K15(Dimethyl)	1756.93	1.09103	0.861368	1.27431	0	0
TFHIFYQLLSGAGEHLK	P35580	N-Term(Dimethyl); K17(Dimethyl)	2017.09	1.05315	1.33854	0.791567	0	0
NTEKENATVAHLVGALR	Q13158	N-Term(Dimethyl); K4(Dimethyl)	1879.04	0.641711	0.679932	0.949514	0	1
AGLGSGLSLSGLVHPELSR	P49748	N-Term(Dimethyl)	1878.04				0	0
SFAPILPHLAEEVFQHIPYIKEPK	Q9NSE4	N-Term(Dimethyl); K21(Dimethyl); K24(Dimethyl)	2887.6				0	1
EELSALVAPAFAHTSQVLVDK	F8VPD4	N-Term(Dimethyl); K21(Dimethyl)	2281.24	0.848443	1.22149	0.698811	0	0
HYAHTDCPGHADYVK	P49411	N-Term(Dimethyl); C7(Carbamidomethyl); K15(Dimethyl)	1826.82	0.872888	0.778445	1.12813	0	0
EAMEDGEIDGNKVTLDWAKPK	P19338	N-Term(Dimethyl); K12(Dimethyl); K19(Dimethyl); K21(Dimethyl)	2458.24			0.990534	0	1
LMTIMDSMNDQELDSTDGAK	P61011	N-Term(Dimethyl); K20(Dimethyl)	2271.01	1.21788	1.08963	1.12448	0	0
WLPAGDALLQMITIHLPSPVTAQK	P13639	N-Term(Dimethyl); K24(Dimethyl)	2656.48	0.828637	0.775803	1.07458	0	0
QVIQGLEALKNEHNSILQSLLETLK	G3V2E7	N-Term(Dimethyl); K10(Dimethyl); K25(Dimethyl)	2902.65				0	1
VHAAVQPGSLDSESGIFACAFDQSESR	O43660	N-Term(Dimethyl); C19(Carbamidomethyl)	2893.32	1.27792	1.23235	1.04327	0	0
GAHLTALEMLTAFASHIR	Q96EL3	N-Term(Dimethyl)	1967.05	0.973338	0.98715	0.991992	0	0
AALAEITEMVAQLHGTMIK	Q9Y4F1	N-Term(Dimethyl); K19(Dimethyl)	2083.12				0	0
GRLYPWGVVEVENPEHNDFLK	Q15019	N-Term(Dimethyl); K21(Dimethyl)	2554.3	1.22352	1.5104	0.814979	0	1
ASGNYATVISHNPETKK	P62917	N-Term(Dimethyl); K16(Dimethyl); K17(Dimethyl)	1901.01	0.814785	0.783266	0.978828	0	1
IHVYGYSMAYGPAQHAISTEK	Q9NRX4	N-Term(Dimethyl); K21(Dimethyl)	2379.17	0.970015	1.94374	0.502075	0	0
DSNYHLLMSVQESLER	P00367	N-Term(Dimethyl)	1948.94	0.986214	0.913424	1.08624	0	0
IGDLQAFQGHGAGNLAGLK	F5GZS6	N-Term(Dimethyl); K19(Dimethyl)	1923.04	1.00454	0.892746	1.13205	0	0
SVNSLDGLASVLYPGCDTLDK	O95573	N-Term(Dimethyl); C16(Carbamidomethyl); K21(Dimethyl)	2280.14	0.492395	0.537598	0.921476	0	0
YLEVVLNTLQQASQAQVDK	Q14974	N-Term(Dimethyl); K19(Dimethyl)	2203.19				0	0
LQNLDALTNLTVLSMQSNR	Q15435	N-Term(Dimethyl)	2159.13	1.04974	1.18147	0.893893	0	0
EAGAGGLAIAVEGPSK	P21333	N-Term(Dimethyl); K16(Dimethyl)	1482.81	0.747502	0.575555	1.02255	0	0
HIDCAAIYGNEPEIGEALKEDVGPGK	P14550	N-Term(Dimethyl); C4(Carbamidomethyl); K19(Dimethyl); K26(Dimethyl)	2866.41			0.428835	0	1
AQASEILLEELQQGLSQAK	Q15276	N-Term(Dimethyl); K19(Dimethyl)	2112.15	1.06525	1.01953	1.05118	0	0
LAQDFLDSQNLSAYNTR	Q9NY33	N-Term(Dimethyl)	1983.97	0.980776	1.1981	0.823575	0	0
DLALSEGDIHTLGCGVAQCLK	P06756	N-Term(Dimethyl); C14(Carbamidomethyl); C19(Carbamidomethyl); K21(Dimethyl)	2313.15				0	0
EHGLNPDVVQNIQDICNSK	Q7Z2W4	N-Term(Dimethyl); C16(Carbamidomethyl); K19(Dimethyl)	2236.1				0	0
YLQDLLAWVEENQHR	Q15149	N-Term(Dimethyl)	1941.97	1.24278	1.14297	1.09392	0	0
WQASSLPADDLCTENAIMLK	Q14204	N-Term(Dimethyl); C12(Carbamidomethyl); K20(Dimethyl)	2319.13	0.886471	0.866169	1.02965	0	0
TWGADVINMTTVPEVVLAK	Q13126	N-Term(Dimethyl); K19(Dimethyl)	2100.13	1.48458	2.06604	0.722923	0	0
MNGFIDQIDGIVHFETR	Q9BT78	N-Term(Dimethyl)	2019.99	1.12092	1.22362	0.92163	0	0
GGGGPGGGGPGGGSAGGPSQPPGGGGPGIR	A0A087WTP3	N-Term(Dimethyl)	2298.09	1.85252	1.65403	1.1268	0	0
FGDYQCNSAMGISQMLK	P54136	N-Term(Dimethyl); C6(Carbamidomethyl); K17(Dimethyl)	2005.92	0.98386	1.04854	0.944012	0	0
GSIVWQEVFDDKAK	P07686	N-Term(Dimethyl); K12(Dimethyl); K14(Dimethyl)	1705.92				0	1
YGDGGSTFQSTTGHCVHMR	P31943	N-Term(Dimethyl); C15(Carbamidomethyl)	2125.91	0.997163	0.884956	1.13363	0	0
GADFLVTEVENGGSLGSK	P14618	N-Term(Dimethyl); K18(Dimethyl)	1835.93	1.03317	1.4593	0.896001	0	0
HSQFIGYPITLFVEK	P07900	N-Term(Dimethyl); K15(Dimethyl)	1835	1.6772	1.10132	1.53215	0	0
ALAFHPIEPVLITASEDHTLK	O43815	N-Term(Dimethyl); K21(Dimethyl)	2358.3		2.93243		0	0
ILATGANVILTTGGIDDMCLK	P17987	N-Term(Dimethyl); C19(Carbamidomethyl); K21(Dimethyl)	2232.2	0.736848	0.80816	0.917293	0	0
IKSGEEDFESLASQFSDCSSAK	Q13526	N-Term(Dimethyl); K2(Dimethyl); C18(Carbamidomethyl); K22(Dimethyl)	2506.16	1.4186	1.2592	1.13343	0	1
TSFTPVGDVFELNFMNVK	P04844	N-Term(Dimethyl); K18(Dimethyl)	2101.06				0	0
ISGWTQALPDMVVSHLFGK	Q92597	N-Term(Dimethyl); K19(Dimethyl)	2142.13				0	0
APQETYADIGGLDNQIQEIK	P62191	N-Term(Dimethyl); K20(Dimethyl)	2259.14				0	0
HKIPVMALVGNDAGWTQISR	A1L0T0	N-Term(Dimethyl); K2(Dimethyl)	2249.21	1.42226			0	1
LALCSADSVAFPVLTHSTR	Q14C86	N-Term(Dimethyl); C4(Carbamidomethyl)	2073.07				0	0
SGVYQHVTGEMMGGHAIR	P07858	N-Term(Dimethyl)	1957.93	1.24976	1.59808	0.786785	0	0
EDLMGLAIGTHGSNIQQAR	B4DXZ6	N-Term(Dimethyl)	2039.03	0.967922	0.953444	1.02135	0	0
SKGLAPDLPEDLYHLIK	P62277	N-Term(Dimethyl); K2(Dimethyl); K17(Dimethyl)	1993.13	1.08922	1.0578	1.03595	0	1
ALAQEWGCPFMETSAK	Q9Y3L5	N-Term(Dimethyl); C8(Carbamidomethyl); K16(Dimethyl)	1881.89	1.25081	1.00587	1.25106	0	0
ESVELPLTHPEYYEEMGIKPPK	P62191	N-Term(Dimethyl); K19(Dimethyl); K22(Dimethyl)	2670.37	0.6703			0	0
TSILAAANPISGHYDR	Q14566	N-Term(Dimethyl)	1713.88	0.696455	0.371791	1.88461	0	0
IKVDEFVTHNLSFDEINK	P11766	N-Term(Dimethyl); K2(Dimethyl); K18(Dimethyl)	2232.19	1.33244	1.50595	0.890153	0	1
EAGSQKDENLALYVENQFR	P02786	N-Term(Dimethyl); K6(Dimethyl)	2267.13	0.890775	0.632017	1.41797	0	1
ASLNGADIYSGCCTLK	P14866	N-Term(Dimethyl); C12(Carbamidomethyl); C13(Carbamidomethyl); K16(Dimethyl)	1785.85	1.06368	1.08116	0.989804	0	0
STMDNPTTTQYASLMHSFILK	Q9NP97	N-Term(Dimethyl); K21(Dimethyl)	2442.19				0	0
MCLAADVPLIESGTAGYLGQVTTIKK	Q9UBT2	N-Term(Dimethyl); C2(Carbamidomethyl); K25(Dimethyl); K26(Dimethyl)	2820.52	0.860833	1.12167	0.772112	0	1
IGKVDCTQHYELCSGNQVR	Q86UY0	N-Term(Dimethyl); K3(Dimethyl); C6(Carbamidomethyl); C13(Carbamidomethyl)	2320.11	1.01765	1.16432	0.879335	0	1
GHSAAVHSFAFSNDSR	E9PF19	N-Term(Dimethyl)	1717.8	1.23353	1.14516	1.08371	0	0
NFQCVDASVLNYDCDVQKK	Q13443	N-Term(Dimethyl); C4(Carbamidomethyl); C14(Carbamidomethyl); K18(Dimethyl); K19(Dimethyl)	2387.13	0.412588	0.562387	0.738089	0	1
TVYVGNLNSQTTTADQLLEFFK	Q8WXA9	N-Term(Dimethyl); K22(Dimethyl)	2545.31	1.08522	1.07855	1.01229	0	0
AIDIYEQVGTNAMDSPLLK	P54920	N-Term(Dimethyl); K19(Dimethyl)	2134.11	1.25605	1.36708	0.92436	0	0
SMLQATAEANNLAAVAGAR	Q8NHH9	N-Term(Dimethyl)	1886.97				0	0
MDENQFVAVTSTNAAK	Q16555;Q14195;E9PD68	N-Term(Dimethyl); K16(Dimethyl)	1781.87				0	0
FFRPHFLQAPGDLTVQEGK	Q8WX93	N-Term(Dimethyl); K19(Dimethyl)	2243.18	0.898057	0.740911	1.21946	0	0
SKSEEAHAEDSVMDHHFR	Q8NC51	N-Term(Dimethyl); K2(Dimethyl)	2167.97	0.894435	0.971804	0.925972	0	1
YVATLGVEVHPLVFHTNR	P62826	N-Term(Dimethyl)	2080.13				0	0
ALKDFVASIDATYAK	P25205	N-Term(Dimethyl); K3(Dimethyl); K15(Dimethyl)	1696.95	0.435648	0.805557	0.544085	0	1
EMFGSGTACVVCPVSDILYK	P54687	N-Term(Dimethyl); C9(Carbamidomethyl); C12(Carbamidomethyl); K20(Dimethyl)	2289.09				0	0
GIYKDDIAQVDYVEPSQNTISLK	O00267	N-Term(Dimethyl); K4(Dimethyl); K23(Dimethyl)	2680.41	0.887362	0.575355	1.55165	0	1
MMDYLQGSGETPQTDVR	Q14697;E9PKU7	N-Term(Dimethyl)	1955.88				0	0
FIKPLSNAYHELAQVYSTNNPSELR	Q9UNS2	N-Term(Dimethyl); K3(Dimethyl)	2947.52				0	0
MVQQCCTYVEEITDLPIK	O00232	N-Term(Dimethyl); C5(Carbamidomethyl); C6(Carbamidomethyl); K18(Dimethyl)	2283.1	0.816794	0.735675	1.117	0	0
IENLSNLHQLQMLELGSNR	Q15435	N-Term(Dimethyl)	2237.16				0	0
LQSGTHCLWTDQLLQGSEK	Q5H9A7	N-Term(Dimethyl); C7(Carbamidomethyl); K19(Dimethyl)	2257.12	1.2133	1.53273	0.7964	0	0
RHVFGESDELIGQK	P60174	N-Term(Dimethyl); K14(Dimethyl)	1670.88	1.05094	1.43991	0.734295	0	1
GIGMGNIGPAGMGMEGIGFGINK	P52272	N-Term(Dimethyl); K23(Dimethyl)	2234.1				0	0
ASYGHSMVVDPWGTVVAR	Q86X76	N-Term(Dimethyl)	1959.97	1.18528	1.24914	0.954632	0	0
GEGAGQPSTSAQGQPAAPAPQKR	F5H2U8	N-Term(Dimethyl); K22(Dimethyl)	2247.14	0.627799	0.567152	1.11365	0	1
TLAVPPWIEYQHHKPPFTNLHVSYQK	Q9H488	N-Term(Dimethyl); K14(Dimethyl); K26(Dimethyl)	3214.71				0	0
VEAVNMAEGIIHDTETK	P38646	N-Term(Dimethyl); K17(Dimethyl)	1912.96	0.79288	0.852261	0.935971	0	0
QNLLAPQNAVSSEETNDFKQETLPSK	P10451	N-Term(Dimethyl); K19(Dimethyl); K26(Dimethyl)	2972.52	0.0867444	0.0393883	2.21565	0	1
ALLEGESNPEIVIWAEHVENMPSEFR	O15061	N-Term(Dimethyl)	3024.47	1.07514	1.14023	0.948641	0	0
RGTGGVDTAAVGGVFDVSNADR	P12277	N-Term(Dimethyl)	2149.06	0.907581	0.865663	1.05479	0	1
DYTGEDVTPQNFLAVLR	Q99538	N-Term(Dimethyl)	1965.99				0	0
NPDGTMNLMNWECAIPGKK	H3BPC4	N-Term(Dimethyl); C13(Carbamidomethyl); K18(Dimethyl); K19(Dimethyl)	2260.08				0	1
NLKPIKPMQFLGDEETVRK	P18669	N-Term(Dimethyl); K3(Dimethyl); K6(Dimethyl); K19(Dimethyl)	2355.34			0.618238	0	1
NALKQETEVELYNEFPEPIKLDK	P51149	N-Term(Dimethyl); K4(Dimethyl); K20(Dimethyl); K23(Dimethyl)	2859.54	0.990085	1.09206	0.912126	0	2
IPSAVGYQPTLATDMGTMQER	P06576	N-Term(Dimethyl)	2294.11	0.936435	0.813951	1.15746	0	0
GGSYSQAASSDSAQGSDVSLTACKV	P01892	N-Term(Dimethyl); C23(Carbamidomethyl); K24(Dimethyl)	2489.14				0	1
LLFGHSTEGDILELVDGHFDTK	A0A087WTH0	N-Term(Dimethyl); K22(Dimethyl)	2499.27				0	0
AKNEILDEVISLSQVTPK	O60313	N-Term(Dimethyl); K2(Dimethyl); K18(Dimethyl)	2068.18	0.87719	0.766126	1.15192	0	1
TLLPHDPTADVFVTPAEEKPIEIQWVKPEPK	Q8TDN6	N-Term(Dimethyl); K19(Dimethyl); K27(Dimethyl); K31(Dimethyl)	3636.99				0	0
MTLADDVTLDDLIMAK	P62191	N-Term(Dimethyl); K16(Dimethyl)	1820.93	0.790191	1.05036	0.756867	0	0
AALETDENLLLCAPTGAGK	O75643	N-Term(Dimethyl); C12(Carbamidomethyl); K19(Dimethyl)	2000.03	0.929809	0.916321	1.02088	0	0
GLKYELISETGGSHDKR	Q12906;Q96SI9	N-Term(Dimethyl); K3(Dimethyl); K16(Dimethyl)	1974.06				0	2
VQEQVHTLLSQDQAQAAR	Q07065	N-Term(Dimethyl)	2050.06	1.17135	1.22847	0.959288	0	0
LVFHTQLAHGSPTGR	O14908	N-Term(Dimethyl)	1648.89	1.05708	1.13857	0.847463	0	0
TIGTGLVTNTLAMTEEEK	P49411	N-Term(Dimethyl); K18(Dimethyl)	1964.01		2.01787		0	0
ATCAPQHGAPGPGPADASK	P21333	N-Term(Dimethyl); C3(Carbamidomethyl); K19(Dimethyl)	1845.89				0	0
LKEIYENMAPGENKR	Q13200	N-Term(Dimethyl); K2(Dimethyl); K14(Dimethyl)	1875.99	0.845004	0.870622	0.976465	0	2
LLGHWEEAAHDLALACK	P50502	N-Term(Dimethyl); C16(Carbamidomethyl); K17(Dimethyl)	1990.02	0.853781	0.856595	1.00276	0	0
TIEDAIAVLSVAEEAADRHPERR	Q96CT7	N-Term(Dimethyl)	2576.33	1.39782	1.19875	1.17314	0	2
ECNMGNLICDAMINNNLR	P21589	N-Term(Dimethyl); C2(Carbamidomethyl); C9(Carbamidomethyl)	2179.97				0	0
TITLEVEPSDTIENVK	P62979;J3QRK5	N-Term(Dimethyl); K16(Dimethyl)	1843.98				0	0
ADVLTTGAGNPVGDKLNVITVGPR	P04040	N-Term(Dimethyl); N10(Deamidated); K15(Dimethyl)	2421.35				0	1
MSVQPTVSLGGFEITPPVVLR	P06748	N-Term(Dimethyl)	2255.26				0	0
QAHLCVLASNCDEPMYVK	P25398	N-Term(Dimethyl); C5(Carbamidomethyl); C11(Carbamidomethyl); K18(Dimethyl)	2191.02	2.42931	0.990723	2.46694	0	0
MTVDESGQLISCSMDDTVR	O75083	N-Term(Dimethyl); C12(Carbamidomethyl)	2171.96	0.991208	0.934842	1.06673	0	0
SEWGSLLEELVAEGK	P17858	N-Term(Dimethyl); K15(Dimethyl)	1702.88	1.11841	1.23559	0.910661	0	0
ESKKEDLVFIFWAPESAPLK	G3V1A4;Q9Y281	N-Term(Dimethyl); K3(Dimethyl); K4(Dimethyl); K20(Dimethyl)	2446.36				0	2
QEIFQEQLAAVPEFR	Q9Y678	N-Term(Dimethyl)	1832.95				0	0
NVDLLSDMVQEHDEPILK	F8W020	N-Term(Dimethyl); K18(Dimethyl)	2151.1				0	0
NLEAVETLGSTSTICSDKTGTLTQNR	P05023	N-Term(Dimethyl); C15(Carbamidomethyl); K18(Dimethyl)	2852.43				0	1
GDVDMSEVEHFMPILMEK	Q9BXS5	N-Term(Dimethyl); K18(Dimethyl)	2163.01	0.739013	0.621458	1.19638	0	0
ATTPVIMVGPGTGVAPFIGFIQER	P16435	N-Term(Dimethyl)	2486.35	1.13622	1.10718	1.03245	0	0
LWAHVYAGAPVSSPEYTK	P61086	N-Term(Dimethyl); K18(Dimethyl)	2032.05	1.37259	1.3358	1.03378	0	0
VWQLGSSSPNFTLEGHEK	P35606	N-Term(Dimethyl); K18(Dimethyl)	2072.04	1.01989	0.958503	1.0705	0	0
RVIISAPSADAPMFVMGVNHEK	P04406	N-Term(Dimethyl); N19(Deamidated); K22(Dimethyl)	2426.25	1.26691	1.50773	0.845375	0	1
AAVPSGASTGIYEALELR	P13929;P09104;P06733	N-Term(Dimethyl)	1832.97				0	0
RAASAATAAPTATPAAQESGTIPK	O00116	N-Term(Dimethyl); K24(Dimethyl)	2295.23	1.23442	1.09491	1.13426	0	1
LKETIDNNSVSSPLQSLQQR	P60228	N-Term(Dimethyl); K2(Dimethyl)	2313.23	1.19293	1.08944	1.10164	0	1
QNFLLFDMTTHPLTNNNIK	Q9H4A6	N-Term(Dimethyl); K19(Dimethyl)	2317.19	1.05549	1.14592	0.926674	0	0
FITHAPPGEFNEVFNDVR	P52907	N-Term(Dimethyl)	2117.04	1.0441	1.07959	0.972992	0	0
IEEIPLDQVDIDKENEMLVTVAHFHK	Q93009	N-Term(Dimethyl); K13(Dimethyl); K26(Dimethyl)	3146.64	1.01464	1.02188	0.998938	0	1
YHEQLSTQSLIELFESFK	Q00610	N-Term(Dimethyl); K18(Dimethyl)	2255.15	1.0701	1.20326	0.894729	0	0
TSESLCQNNMVILK	O14980	N-Term(Dimethyl); C6(Carbamidomethyl); K14(Dimethyl)	1692.86	0.937732	1.05336	0.895628	0	0
QQSHFAMMHGGTGFAGIDSSSPEVK	Q15365	N-Term(Dimethyl); K25(Dimethyl)	2662.23	0.782799	1.16064	0.678547	0	0
IYHCNINSQGVICLDILK	R4GND1	N-Term(Dimethyl); C4(Carbamidomethyl); C13(Carbamidomethyl); K18(Dimethyl)	2216.15	1.61185	1.57533	1.02939	0	0
LASTLVHLGEYQAAVDGAR	Q00610	N-Term(Dimethyl)	1999.06	0.789965	1.027	1.0135	0	0
IMNLTVMLDTALGKPR	Q96RS6	N-Term(Dimethyl); K14(Dimethyl)	1829.03				0	0
LKVDELISSAIFHFK	Q13325	N-Term(Dimethyl); K2(Dimethyl); K15(Dimethyl)	1831.07				0	1
ILCEELGAPANSAVNCVPLEDFGGHHPDPNLTYAADLVETMK	P36871	N-Term(Dimethyl); C3(Carbamidomethyl); C16(Carbamidomethyl); K42(Dimethyl)	4621.18				0	0
GVTIIGPATVGGIKPGCFK	P53396	N-Term(Dimethyl); K14(Dimethyl); C17(Carbamidomethyl); K19(Dimethyl)	1956.13	0.944296	0.915659	1.03753	0	0
GAQVNAVNQNGCTPLHYAASK	B1AJY7	N-Term(Dimethyl); N10(Deamidated); C12(Carbamidomethyl); K21(Dimethyl)	2257.09				0	0
LNEAAAGLNQAATELVQASR	Q9Y490	N-Term(Dimethyl); Q10(Deamidated)	2056.08				0	0
LFIGGLNVQTSESGLR	Q13151	N-Term(Dimethyl)	1718.94	0.869962	0.990063	0.538705	0	0
CQEVISWLDANTLAEKDEFEHK	P08107	N-Term(Dimethyl); C1(Carbamidomethyl); K16(Dimethyl); K22(Dimethyl)	2746.33				0	1
ILLELLNQMDGFDQNVNVK	P43686	N-Term(Dimethyl); K19(Dimethyl)	2259.19	0.915605	0.958949	0.960595	0	0
LHIIEVGTPPTGNQPFPK	Q00610	N-Term(Dimethyl); K18(Dimethyl)	2001.11	0.698683	0.444078	1.58288	0	0
EIGPNDGFLAQLCQLNDR	P51452	N-Term(Dimethyl); C13(Carbamidomethyl)	2088.01	1.26691	1.36059	0.936795	0	0
GSLAADKVVEEIRR	P51659	N-Term(Dimethyl); K7(Dimethyl)	1598.92	1.17131	1.30971	0.899751	0	2
LIDDYGVEEEPAELPEGTSLTVDNKR	Q00577	N-Term(Dimethyl); K25(Dimethyl)	2945.47				0	1
VDYIMQLPVPMDAALNKEELLEYEEK	P45974	N-Term(Dimethyl); K17(Dimethyl); K26(Dimethyl)	3164.6			1.10467	0	1
LITQTFSHHNQLAQK	Q9Y266	N-Term(Dimethyl); K15(Dimethyl)	1821.99	0.944278	1.0769	0.897406	0	0
YLEQLHQLYSDSFPMELR	P40763	N-Term(Dimethyl)	2297.12	1.61075	2.00959	0.806396	0	0
VNLEESSGVENSPAGARPK	Q8WVM8	N-Term(Dimethyl); K19(Dimethyl)	1997.03	0.937091	1.08833	0.866259	0	0
QETEFFQQNQTGNIMSR	Q03518	N-Term(Dimethyl)	2085.96	3.26264	4.23697	0.774714	0	0
SSILLDVKPWDDETDMAK	P24534	N-Term(Dimethyl); K8(Dimethyl); K18(Dimethyl)	2147.09	0.87695	0.925015	0.953792	0	0
RSEAEEAITSFNGHKPPGSSEPITVK	Q15717	N-Term(Dimethyl); K15(Dimethyl); K26(Dimethyl)	2852.48				0	1
AQFAQPEILIGTIPGAGGTQR	P30084	N-Term(Dimethyl)	2153.17	0.975048	0.858563	1.14257	0	0
LKNDQANYSLNTDDPLIFK	P00813	N-Term(Dimethyl); K2(Dimethyl); K19(Dimethyl)	2293.2				0	1
GYIWNYGAIPQTWEDPGHNDK	Q15181	N-Term(Dimethyl); K21(Dimethyl)	2517.18	1.21043	1.15881	1.05089	0	0
QFTPCQLLADHANSPNKK	P40939	N-Term(Dimethyl); C5(Carbamidomethyl); K17(Dimethyl); K18(Dimethyl)	2153.11			1.58558	0	1
TQQAAQANITLQEQIEAIHK	Q15459	N-Term(Dimethyl); K20(Dimethyl)	2291.23				0	0
LYGSAGPPPTGEEDTAEKDEL	P11021	N-Term(Dimethyl); K18(Dimethyl)	2232.05	1.91191	2.83968	0.492406	0	1
GFGFVTFDDHDPVDK	P22626	N-Term(Dimethyl); K15(Dimethyl)	1751.83	1.01759	1.05523	0.989274	0	0
GYNQFAYDGKDYIALNEDLR	Q31612;Q95604;P30504	N-Term(Dimethyl); K10(Dimethyl)	2421.16				0	1
AKPVATAPIPGTPWCVVWTGDER	O14776	N-Term(Dimethyl); K2(Dimethyl); C15(Carbamidomethyl)	2564.33	0.923504	1.0227	0.908484	0	0
TPCSSLLPLLNAHAATSGK	Q9NUQ6	N-Term(Dimethyl); C3(Carbamidomethyl); K19(Dimethyl)	1994.07				0	0
GGHSGQLGPSSVAPSFRPEDELEHLTKK	Q93052	N-Term(Dimethyl); K27(Dimethyl); K28(Dimethyl)	3044.58	0.913115	1.24583	0.737384	0	1
LLGPGVNYSGCQITWAK	P40763	N-Term(Dimethyl); C11(Carbamidomethyl); K17(Dimethyl)	1920	1.27144	1.60833	0.795332	0	0
LFQQILSGVDYCHR	Q13131	N-Term(Dimethyl); C12(Carbamidomethyl)	1763.89	1.24589	1.22809	1.02066	0	0
DGEDQTQDTELVETRPAGDGTFQK	P30455;Q31612;Q95604;Q29963;Q29960;P01892	N-Term(Dimethyl); K24(Dimethyl)	2693.24				0	0
LHHVSSLAWLDEHTLVTTSHDASVK	O75083	N-Term(Dimethyl); K25(Dimethyl)	2839.47	0.930017	0.963427	0.97118	0	0
VAMSHFEPNEYIHYDLLEK	Q99798	N-Term(Dimethyl); K19(Dimethyl)	2391.16	1.04907	1.39975	0.754016	0	0
LGEVVNTHGPVEPDKDNIR	P30419	N-Term(Dimethyl); K15(Dimethyl)	2145.13	1.03257	1.13607	0.914417	0	1
LKETCVSGEDPTQGADLSPDEK	Q02952	N-Term(Dimethyl); K2(Dimethyl); C5(Carbamidomethyl); K22(Dimethyl)	2460.18				0	1
MQTDKPFDQTTISLQMGTNK	Q15417	N-Term(Dimethyl); K5(Dimethyl); K20(Dimethyl)	2368.19				0	0
IYPEEMIQTGISAIDGMNSIAR	P21281	N-Term(Dimethyl)	2437.2	0.737461	0.927154	0.80023	0	0
AGYSQGATQYTQAQQTR	Q96KR1	N-Term(Dimethyl)	1886.89				0	0
MLDEMKDNLLLDMYLAPHVR	C9JFE4	N-Term(Dimethyl); K6(Dimethyl)	2473.25				0	1
EDQSILCTGESGAGKTENTK	P35579;P35580	N-Term(Dimethyl); C7(Carbamidomethyl); K15(Dimethyl); K20(Dimethyl)	2209.05				0	1
VVPENLGLQEGTHELCYNTACALIGQGQLNQAMK	O76094	N-Term(Dimethyl); C16(Carbamidomethyl); C21(Carbamidomethyl); K34(Dimethyl)	3812.88	1.23304	1.69403	0.732291	0	0
VGGYILGEFGNLIAGDPR	O94973;O95782	N-Term(Dimethyl)	1875.99				0	0
DVIGIAHHPHQNLIATYSEDGLLK	Q2TAY7	N-Term(Dimethyl); K24(Dimethyl)	2697.43				0	0
LIVDEAINEDNSVVSLSQPK	P55072	N-Term(Dimethyl); K20(Dimethyl)	2226.18				0	0
EGSVVVDLAAEAGGNFETTKPGELYIHK	Q13423	N-Term(Dimethyl); K20(Dimethyl); K28(Dimethyl)	3015.57	0.840547	0.797387	1.06052	0	0
LVVTQEDVELAYQEAMMNMAR	P49903	N-Term(Dimethyl)	2469.18				0	0
TQIALSPNNHEVHIYK	Q92747	N-Term(Dimethyl); K16(Dimethyl)	1920.03	0.971517	1.12064	0.872194	0	0
EIFLSQPILLELEAPLK	P62140;F8VYE8;P62136	N-Term(Dimethyl); K17(Dimethyl)	2009.19				0	0
QLTVQMMQNPQILAALQER	F8W020	N-Term(Dimethyl)	2240.18				0	0
VGEGPGVCWLAPEQTAGK	Q9H4A4	N-Term(Dimethyl); C8(Carbamidomethyl); K18(Dimethyl)	1911.96				0	0
ATGEADVEFVTHEDAVAAMSK	P31942	N-Term(Dimethyl); K21(Dimethyl)	2234.06	1.39233	0.992743	2.47823	0	0
LLEALDEMLTHDIAK	Q9NZN4	N-Term(Dimethyl); K15(Dimethyl)	1767.95				0	0
QMQLENVSVALEFLDR	O75369;P21333	N-Term(Dimethyl)	1919.99				0	0
ETLLNGVGYLHEGLSPMER	O75643	N-Term(Dimethyl); N5(Deamidated)	2144.05	0.953816	0.85995	1.11588	0	0
LCTQLEGLQSTVTGHVER	Q6P2E9	N-Term(Dimethyl); C2(Carbamidomethyl)	2056.05	1.1874	1.83354	0.651533	0	0
MTNGFSGADLTEICQR	P55072	N-Term(Dimethyl); C14(Carbamidomethyl)	1827.83	1.20231	1.41758	0.980786	0	0
TQVELLEAPTPALKR	P13807	N-Term(Dimethyl); K14(Dimethyl)	1722.01	1.37483	1.58691	0.871612	0	1
LEQQVPVNQVFGQDEMIDVIGVTK	P39023	N-Term(Dimethyl); K24(Dimethyl)	2742.43	0.743562	0.882753	0.847434	0	0
LISLTDENALSGNEELTVK	P14625	N-Term(Dimethyl); K19(Dimethyl)	2102.12			1.14595	0	0
TNIVTASVDAINFHDK	O00154	N-Term(Dimethyl); K16(Dimethyl)	1800.94	0.78227	0.691991	1.13732	0	0
SVIEQGGIQTVDQLIK	Q8WUM4	N-Term(Dimethyl); K16(Dimethyl)	1784.01	1.10222	1.29557	0.855927	0	0
ILQEAQNLMALTNVDTPLK	Q99459	N-Term(Dimethyl); K19(Dimethyl)	2168.19				0	0
VGINYQPPTVVPGGDLAK	P68363;Q9BQE3	N-Term(Dimethyl); K18(Dimethyl)	1881.04				0	0
AEPHFLSILQHLLLVR	E7ERW8	N-Term(Dimethyl)	1914.13				0	0
VIDPVTGKPCAGTTYLESPLSSETTQLSK	E9PE17	N-Term(Dimethyl); K8(Dimethyl); C10(Carbamidomethyl); K29(Dimethyl)	3163.63				0	0
FGQMLGSNMTEFHSQISK	Q14204	N-Term(Dimethyl); K18(Dimethyl)	2098.01	0.740628	0.893704	0.930876	0	0
ILDSFAAAPVPTTTLVLK	P18583	N-Term(Dimethyl); K18(Dimethyl)	1913.13	0.891844	0.93492	0.959715	0	0
QLCDNAGFDATNILNK	Q99832	N-Term(Dimethyl); C3(Carbamidomethyl); K16(Dimethyl)	1849.91				0	0
GYGFCEYQDQETALSAMR	P33240	N-Term(Dimethyl); C5(Carbamidomethyl)	2153.92	1.22096	1.15289	1.06546	0	0
AIMAHMTVEEIYKDR	O75955	N-Term(Dimethyl); K13(Dimethyl)	1862.94	1.18666	1.19485	0.999169	0	1
RFDEILEASDGIMVAR	P14618;H3BR70	N-Term(Dimethyl)	1849.94				0	1
VNLQNNPGAMEHFHMK	P51572	N-Term(Dimethyl); K16(Dimethyl)	1922.93				0	0
QLLHNFPPDQLTSSGAPFWSGPK	P22314	N-Term(Dimethyl); K23(Dimethyl)	2580.32	0.550689	0.506437	1.09398	0	0
AENGKLVINGNPITIFQERDPSK	P04406	N-Term(Dimethyl); K5(Dimethyl); K23(Dimethyl)	2624.44	1.01793	1.08883	0.940557	0	2
NITLNFGPQHPAAHGVLR	O75306	N-Term(Dimethyl)	1970.07	0.867685	0.731487	1.19339	0	0
ETVSQRPGATVPTDFATFPSSAFLR	E7EX90	N-Term(Dimethyl)	2710.38	1.24284	1.40004	0.8931	0	0
SILNSLSGEELETLKVELEQLK	Q9NRY5	N-Term(Dimethyl); K15(Dimethyl); K22(Dimethyl)	2556.44	1.07175	1.22292	0.88171	0	1
TDEFQLHTNVNDGTEFGGSIYQK	P21796	N-Term(Dimethyl); K23(Dimethyl)	2656.25	0.920778	0.788066	1.17549	0	0
DGIDDESYGQIFKPIISK	Q92769	N-Term(Dimethyl); K13(Dimethyl); K18(Dimethyl)	2109.1				0	0
QFASQANVVGPWIQTK	O43707	N-Term(Dimethyl); K16(Dimethyl)	1829.99	0.851988	0.88237	0.971427	0	0
GYHQYAYDGKDYIALK	P01892	N-Term(Dimethyl); K10(Dimethyl); K16(Dimethyl)	1989.01	2.19037	2.51747	0.396037	0	1
TAAKGEAAAERPGEAAVASSPSK	A0A087WZH7	N-Term(Dimethyl); K4(Dimethyl); K23(Dimethyl)	2240.18	0.795553	0.407249	1.96534	0	1
SLLTEADAGHTEFTDEVYQNESR	Q9NZM1	N-Term(Dimethyl)	2640.2	0.888742	0.927508	0.964018	0	0
HNLITEMVALNPDFKPPADYKPPATR	Q15637	N-Term(Dimethyl); K15(Dimethyl); K21(Dimethyl)	3019.6				0	0
LKGTVGEPTYDAEFQHFLR	Q14204	N-Term(Dimethyl); K2(Dimethyl)	2264.17				0	1
NWIEEVTGMSIGPNFQLGLK	Q15417	N-Term(Dimethyl); K20(Dimethyl)	2289.19				0	0
NVCLPPEMEVALTEDQVPALK	P27816	N-Term(Dimethyl); C3(Carbamidomethyl); K21(Dimethyl)	2409.24	1.17122	1.1323	1.04064	0	0
LNFSHGTHEYHAETIK	P14618	N-Term(Dimethyl); K16(Dimethyl)	1939.96	1.36664	1.7379	0.659481	0	0
TLEEGHDFIQEFPGSPAFAALTSIAQK	Q9Y5Y2	N-Term(Dimethyl); K27(Dimethyl)	2960.5	0.764409	1.00941	0.761881	0	0
FAIQTDPNSNDGLVTVVKPIDFETNR	P19022	N-Term(Dimethyl); K18(Dimethyl)	2946.52	0.994601	1.07344	0.932175	0	0
TVQQHAGETDPVTTMR	H3BPK3	N-Term(Dimethyl)	1798.87	1.34196	1.20725	1.11833	0	0
LYKEELEQTYHAK	P20700	N-Term(Dimethyl); K3(Dimethyl); K13(Dimethyl)	1735.92	0.91845	0.884798	1.05711	0	1
LNLPINIIGLAPLCENMPSGK	P28838	N-Term(Dimethyl); C14(Carbamidomethyl); K21(Dimethyl)	2320.27				0	0
LRQEEPQSLQAAVR	P29590	N-Term(Dimethyl)	1652.9	1.95397	2.23723	0.878688	0	1
GTVPDDAVEALADSLGKK	E9PCH5;E7ES10	N-Term(Dimethyl); K17(Dimethyl); K18(Dimethyl)	1870.01				0	1
QALQDLLSEYMGNAGR	P35221	N-Term(Dimethyl)	1793.88	0.843906	0.993481	0.854599	0	0
GTVLLADNVICPGAPDFLAHVR	P21964	N-Term(Dimethyl); C11(Carbamidomethyl)	2363.25	1.46974	1.4366	1.02928	0	0
VLPEFDTPGHTLSWGK	P07686	N-Term(Dimethyl); K16(Dimethyl)	1839.96	1.13282	1.3465	0.846413	0	0
TLGSAFLNIMWPHEIANGK	J3KNV4	N-Term(Dimethyl); K19(Dimethyl)	2155.13			0.714929	0	0
TFQLQLLSPSSSIVPAFNTGTITQVIK	O43747	N-Term(Dimethyl); K27(Dimethyl)	2946.65	0.84601	1.18447	0.718586	0	0
QAVQELVSLYYEEAR	P54802	N-Term(Dimethyl)	1825.93	0.570284	0.616257	0.931017	0	0
GLVSTLQSATEQMAATVAGSVR	Q6P2E9	N-Term(Dimethyl)	2205.15				0	0
HSGNITFDEIVNIAR	P30050	N-Term(Dimethyl)	1713.89	1.32443	1.0554	1.26253	0	0
FQHPSTMHILQPMDIHVELAK	Q709C8	N-Term(Dimethyl); K21(Dimethyl)	2528.31				0	0
IAQLEEELEEEQGNTELINDR	P35579	N-Term(Dimethyl)	2500.2	1.15167	0.988537	1.17209	0	0
AVCMLSNTTAVAEAWAR	Q9BQE3	N-Term(Dimethyl); C3(Carbamidomethyl)	1878.91				0	0
LPHVLLLQLGTTFFK	O43809	N-Term(Dimethyl); K15(Dimethyl)	1783.08	1.25552	1.36266	0.926963	0	0
DKLYHPECFMCSDCGLNLK	P50479	N-Term(Dimethyl); K2(Dimethyl); C8(Carbamidomethyl); C11(Carbamidomethyl); C14(Carbamidomethyl); K19(Dimethyl)	2471.12	0.87305	0.966621	0.90868	0	1
EKPSYDTETDPSEGLMNVLK	Q9HB71	N-Term(Dimethyl); K2(Dimethyl); K20(Dimethyl)	2337.15	0.999197	0.766708	1.31114	0	0
LVDELMEAPGDVEALAPPVR	P48960	N-Term(Dimethyl)	2149.12	0.971151	1.13883	0.85794	0	0
ISKPAPYWEGTAVIDGEFK	Q13162	N-Term(Dimethyl); K3(Dimethyl); K19(Dimethyl)	2192.16	1.44926	1.28889	1.01042	0	0
ESNPATINAATELDTPK	P24821;J3QSU6	N-Term(Dimethyl); K17(Dimethyl)	1827.93				0	0
GVQDIVVGEGTHFLIPWVQKPIIFDCR	P35232	N-Term(Dimethyl); K20(Dimethyl); C26(Carbamidomethyl)	3179.7				0	0
QAILESPVSSCPPELANHPDAQHKPGTILTK	Q9BUQ8	N-Term(Dimethyl); C11(Carbamidomethyl); K24(Dimethyl); K31(Dimethyl)	3419.79	1.02458	0.932407	1.10553	0	0
AIMKDPDDHTVCHLLFANQTEK	P00387	N-Term(Dimethyl); K4(Dimethyl); C12(Carbamidomethyl); K22(Dimethyl)	2667.32	1.02675	1.24114	0.757306	0	1
QQTHMLDVMQDHFSR	P10909	N-Term(Dimethyl)	1900.88	1.59301	1.22818	1.30492	0	0
VRTDITYPAGFMDVISIDK	P62701	N-Term(Dimethyl); K19(Dimethyl)	2197.15	0.656253	0.629117	1.04946	0	1
ISVNNVLPVFDNLMQQK	P07339	N-Term(Dimethyl); K17(Dimethyl)	2015.09	1.24381	1.71264	0.730658	0	0
GVVPLAGTNGETTTQGLDGLSER	P04075	N-Term(Dimethyl)	2300.16	1.29077	1.43694	0.951569	0	0
GLGHQVATDALVAMEK	Q9Y3I0	N-Term(Dimethyl); K16(Dimethyl)	1695.91	1.0764	1.04655	1.03477	0	0
LKAEPAAPPAAPSTPAPPPAVPK	P48634	N-Term(Dimethyl); K2(Dimethyl); K23(Dimethyl)	2259.31				0	1
YIAIASTTVETTDPEKEVEPALELLEPIDQK	P31150	N-Term(Dimethyl); K16(Dimethyl); K31(Dimethyl)	3526.86				0	1
STGEAFVQFASQEIAEK	P31943;P55795	N-Term(Dimethyl); K17(Dimethyl)	1897.95				0	0
ATASSSAQEMEQQLAER	J3KQ34	N-Term(Dimethyl)	1864.87				0	0
AAPGAGDAAAGSGAEFAGGDGAAR	Q5K4L6	N-Term(Dimethyl)	2002.91	1.41708	1.57422	0.905638	0	0
SKLEDIANAALAASAVTQVAK	Q8WVM8	N-Term(Dimethyl); K2(Dimethyl); K21(Dimethyl)	2155.23				0	1
VNPCIGGVILFHETLYQK	P04075	N-Term(Dimethyl); C4(Carbamidomethyl); K18(Dimethyl)	2144.15	1.87302	2.22416	0.891518	0	0
AALWALQGGTSVVIANGTHPK	P54886	N-Term(Dimethyl); K21(Dimethyl)	2147.19	0.761179	1.03528	0.739704	0	0
ATSNVFAMFDQSQIQEFK	P19105	N-Term(Dimethyl); K18(Dimethyl)	2147.04				0	0
AGQPLQLLDASWYLPK	B1AH49	N-Term(Dimethyl); K16(Dimethyl)	1856.03				0	0
GQVEQANQELQELIQSVK	P55268	N-Term(Dimethyl); K18(Dimethyl)	2097.11	1.80054	1.023	1.77075	0	0
FGLGSVAGAVGATAVYPIDLVK	Q9UJS0	N-Term(Dimethyl); K22(Dimethyl)	2161.22				0	0
[truncated: 72,242 more rows]

## Sheet: Table S2
Table S2. Total identified peptides information in the reverse dimethyl labeling experiment.
Sequence	Protein Group Accessions	Modifications	MH+ [Da]	Heavy/Light	Heavy/Medium	Medium/Light	q-Value	Missed Cleavages
AVDHINSTIAPALISSGLSVVEQEKLDNLMLELDGTENK	P09104	N-Term(Dimethyl); K25(Dimethyl); K39(Dimethyl)	4248.24	0.446136	0.682771	0.62708	0	1
MALIQMGSVEEAVQALIDLHNHDLGENHHLR	A6NLN1	N-Term(Dimethyl); Q14(Deamidated)	3519.76	0.880892	0.915298	0.963494	0	0
NDPPMEAAGFTAQVIILNHPGQISAGYAPVLDCHTAHIACK	P68104	N-Term(Dimethyl); C33(Carbamidomethyl); C40(Carbamidomethyl); K41(Dimethyl)	4441.18				0	0
FQSAAIGALQEASEAYLVGLFEDTNLCAIHAK	K7EK07	N-Term(Dimethyl); C27(Carbamidomethyl); K32(Dimethyl)	3493.76	0.966487	0.978987	0.988344	0	0
AIFTGHSAVVEDVAWHLLHESLFGSVADDQK	Q16576	N-Term(Dimethyl); K31(Dimethyl)	3434.72	1.0738	0.974098	1.10359	0	0
QNLLQAAGNVGQASGELLQQIGESDTDPHFQDALMQLAK	Q9Y490	N-Term(Dimethyl); K39(Dimethyl)	4192.09	1.05086	0.974126	1.07998	0	0
GILGYTEHQVVSSDFNSDTHSSTFDAGAGIALNDHFVK	P04406	N-Term(Dimethyl); K38(Dimethyl)	4092.94	0.630491	0.891255	0.701665	0	0
HIADLAGNSEVILPVPAFNVINGGSHAGNK	P06733	N-Term(Dimethyl); K30(Dimethyl)	3067.62				0	0
TPAGNFVTLEEGKGDLEEYGQDLLHTVFK	P43490	N-Term(Dimethyl); K13(Dimethyl); K29(Dimethyl)	3291.67	0.681974	0.768116	0.888853	0	1
AEGSDVANAVLDGADCIMLSGETAKGDYPLEAVR	P14618;H3BR70	N-Term(Dimethyl); C16(Carbamidomethyl); K25(Dimethyl)	3550.7				0	1
LHEEEIQELQAQIQEQHVQIDVDVSKPDLTAALR	P08670	N-Term(Dimethyl); K26(Dimethyl)	3979.07	1.12221	1.25186	0.897449	0	0
FEQVNLLDSNAVHHIIHDFQPHVIVHCAAER	Q9NZL9	N-Term(Dimethyl); N5(Deamidated); C27(Carbamidomethyl)	3674.84	0.781364	0.822793	0.950718	0	0
GHDQSAYDGKDYIALNEDLSSWTAADTAAQITQR	P30466	N-Term(Dimethyl); K10(Dimethyl)	3767.77	0.336252	0.707939	0.421064	0	1
QSKPVTTPEEIAQVATISANGDKEIGNIISDAMK	P10809	N-Term(Dimethyl); K3(Dimethyl); K23(Dimethyl); K34(Dimethyl)	3667.95				0	1
SIVDYKPNLDLLEQQHQLIQEALIFDNK	O43707	N-Term(Dimethyl); K6(Dimethyl); K28(Dimethyl)	3408.84	1.18216	0.899079	1.31633	0	0
DVMQNHLLQMLCLVAMEKPASTNSDDVRDEK	P11413;E7EUI8	N-Term(Dimethyl); C12(Carbamidomethyl); K18(Dimethyl); K31(Dimethyl)	3671.79				0	1
CFGFVTYSNVEEADAAMAASPHAVDGNTVELKR	Q13151	N-Term(Dimethyl); C1(Carbamidomethyl); K32(Dimethyl)	3612.71	1.08685	1.11222	0.978283	0	1
AALDSGAFQSVWVSTDHDEIENVAK	Q8NFW8	N-Term(Dimethyl); K25(Dimethyl)	2745.33	0.565736	0.671286	0.843713	0	0
FTLDCTHPVEDGIMDAANFEQFLQER	P35268	N-Term(Dimethyl); C5(Carbamidomethyl)	3111.42	1.43432	1.23568	1.16206	0	0
FQEHLQLQNLGINPANIGFSTLTMESDKFICIR	Q00610	N-Term(Dimethyl); K28(Dimethyl); C31(Carbamidomethyl)	3890.99	0.653072	0.672547	0.972137	0	1
QTTVSNSQQAYQEAFEISKK	P31946	N-Term(Dimethyl); K19(Dimethyl); K20(Dimethyl)	2371.21				0	1
VIHDNFGIVEGLMTTVHAITATQK	P04406	N-Term(Dimethyl); K24(Dimethyl)	2651.41	0.510826	0.723595	0.70675	0	0
LELVHHGPMAVAFEVYDDFLHYKK	P53634	N-Term(Dimethyl); K23(Dimethyl); K24(Dimethyl)	2942.52	0.380967	0.72358	0.641533	0	1
TVSLGAGAKDELHIVEAEAMNYEGSPIK	P06748	N-Term(Dimethyl); K9(Dimethyl); K28(Dimethyl)	3013.55	1.10567	1.16333	0.998181	0	1
HIADLAGNSEVILPVPAFNVINGGSHAGNK	P06733	N-Term(Dimethyl); N22(Deamidated); K30(Dimethyl)	3068.61	0.677777	0.829364	0.765494	0	0
ECISIHVGQAGVQIGNACWELYCLEHGIQPDGQMPSDK	P68363;Q71U36;Q9BQE3	N-Term(Dimethyl); C2(Carbamidomethyl); C18(Carbamidomethyl); C23(Carbamidomethyl); K38(Dimethyl)	4353.01				0	0
AEGSDVANAVLDGADCIMLSGETAK	P14618;H3BR70	N-Term(Dimethyl); C16(Carbamidomethyl); K25(Dimethyl)	2550.19				0	0
ADGYVDNLAEAVDLLLQHADK	Q9H008	N-Term(Dimethyl); K21(Dimethyl)	2326.18	0.539661	0.739401	0.730684	0	0
VELSEQQLQLWPSDVDKLSPTDNLPR	P09543	N-Term(Dimethyl); K17(Dimethyl)	3063.59				0	1
AFLADPSAFVAAAPVAAATTAAPAAAAAPAKVEAK	P05388	N-Term(Dimethyl); K31(Dimethyl); K35(Dimethyl)	3263.8				0	1
VLGAHILGPGAGEMVNEAALALEYGASCEDIAR	P09622	N-Term(Dimethyl); C28(Carbamidomethyl)	3382.67	1.55218	1.13725	1.36639	0	0
TAAGLMHTFNAHAATDITGFGILGHAQNLAK	P49903	N-Term(Dimethyl); K31(Dimethyl)	3205.65	0.718833	0.896414	0.802801	0	0
HIAQLAGNSDLILPVPAFNVINGGSHAGNK	P09104	N-Term(Dimethyl); N22(Deamidated); K30(Dimethyl)	3081.64	0.508599	0.766345	0.664416	0	0
GMGGHGYGGAGDASSGFHGGHFVHMR	P31942	N-Term(Dimethyl)	2571.11	0.926592	0.9526	0.973794	0	0
EVKGDLENAFLNLVQCIQNKPLYFADR	P07355	N-Term(Dimethyl); K3(Dimethyl); C16(Carbamidomethyl); K20(Dimethyl)	3278.71				0	1
AQNAIAGEGMGISHELITLEISSR	P20591	N-Term(Dimethyl)	2525.29				0	0
AAVSHWQQQSYLDSGIHSGATTTAPSLSGK	B4DGU4	N-Term(Dimethyl); K30(Dimethyl)	3141.55	1.00314	1.1534	0.870706	0	0
NWRDPDQTDGLGLSYLSSHIANVER	A0A0A0MS51	N-Term(Dimethyl)	2871.4	0.698912	0.782599	0.894071	0	1
QLGDNEAITQEIVGCAHLENYALK	A0A087WY55	N-Term(Dimethyl); C15(Carbamidomethyl); K24(Dimethyl)	2742.37				0	0
GQDMETEAHQNKLEEMINELAVAMTAVK	Q15363	N-Term(Dimethyl); K12(Dimethyl); K28(Dimethyl)	3214.57	0.995407	1.04184	0.956506	0	1
VIAINVDDPDAANYNDINDVKR	Q15181	N-Term(Dimethyl); K21(Dimethyl)	2500.26	0.831737	0.984751	0.837803	0	1
QAAASATQTIAAAQHAASTPK	Q9Y490	N-Term(Dimethyl); K21(Dimethyl)	2051.07	1.0276	0.957776	1.07411	0	0
EVEAVIPDHCIFASNTSALPISEIAAVSK	P40939	N-Term(Dimethyl); C10(Carbamidomethyl); K29(Dimethyl)	3124.62	1.66842	1.1425	1.46197	0	0
GDLENAFLNLVQCIQNKPLYFADR	P07355	N-Term(Dimethyl); C13(Carbamidomethyl); K17(Dimethyl)	2894.47	1.97795	1.27758	1.54995	0	0
ECENCDCLQGFQLTHSLGGGTGSGMGTLLISK	Q13509	N-Term(Dimethyl); C2(Carbamidomethyl); C5(Carbamidomethyl); C7(Carbamidomethyl); K32(Dimethyl)	3483.59	0.817317	0.892608	0.916682	0	0
SKDDQVTVIGAGVTLHEALAAAELLKK	P29401	N-Term(Dimethyl); K2(Dimethyl); K26(Dimethyl); K27(Dimethyl)	2889.66	1.02114	0.907448	1.12656	0	2
AKVDEFPLCGHMVSDEYEQLSSEALEAAR	X1WI28	N-Term(Dimethyl); K2(Dimethyl); C9(Carbamidomethyl)	3337.57	0.966193	0.965381	1.00197	0	1
FTASAGIQVVGDDLTVTNPKR	P06733	N-Term(Dimethyl); K20(Dimethyl)	2245.21	0.560005			0	1
LVNWSCTLNSAISDIEVDKK	P26640	N-Term(Dimethyl); C6(Carbamidomethyl); K19(Dimethyl); K20(Dimethyl)	2376.24				0	1
YQKPIIQSEYGAETIAGFHQDPPLMFTEEYQK	P08236	N-Term(Dimethyl); K3(Dimethyl); K32(Dimethyl)	3842.89				0	0
ANCDASLIVTEELHLITFETEVYHQGLK	P40763	N-Term(Dimethyl); C3(Carbamidomethyl); K28(Dimethyl)	3286.65				0	0
ALSDHHIYLEGTLLKPNMVTPGHACTQK	P04075	N-Term(Dimethyl); K15(Dimethyl); C25(Carbamidomethyl); K28(Dimethyl)	3215.66	0.437857	0.682357	0.72618	0	0
QTIGNSCGTIGLIHAVANNQDKLGFEDGSVLK	P09936	N-Term(Dimethyl); C7(Carbamidomethyl); K22(Dimethyl); K32(Dimethyl)	3440.78	0.71384	0.885248	0.807281	0	1
LELVHHGPMAVAFEVYDDFLHYK	P53634	N-Term(Dimethyl); K23(Dimethyl)	2786.39	0.41601	0.719449	0.578885	0	0
FRCPEALFQPSFLGMESCGIHETTFNSIMK	P60709	N-Term(Dimethyl); C3(Carbamidomethyl); C18(Carbamidomethyl); K30(Dimethyl)	3590.68				0	1
SGPFGQIFRPDNFVFGQSGAGNNWAK	Q9BVA1;Q13885;P07437;P68371;P04350	N-Term(Dimethyl); N22(Deamidated); K26(Dimethyl)	2855.38				0	0
SINTEVVACSVDSQFTHLAWINTPR	Q13162	N-Term(Dimethyl); C9(Carbamidomethyl)	2873.41	0.800073	0.950813	0.84241	0	0
AALAGGTTMIIDHVVPEPESSLTEAYEK	Q14195	N-Term(Dimethyl); K28(Dimethyl)	2985.5	0.994505	0.886134	1.12356	0	0
IVKPNGEKPDEFESGISQALLELEMNSDLK	P62081	N-Term(Dimethyl); K3(Dimethyl); K8(Dimethyl); K30(Dimethyl)	3442.79	1.13036	1.00976	1.07869	0	0
LDEEAENLVATVVPTHLAAAVPEVAVYLK	F6WIT2	N-Term(Dimethyl); K29(Dimethyl)	3117.71	0.779328	0.577429	1.35117	0	0
LTLYDIAHTPGVAADLSHIETK	P40926	N-Term(Dimethyl); K22(Dimethyl)	2421.29	1.27728	1.10276	1.15956	0	0
QTASVTLQAIAAQNAAVQAVNAHSNILK	B9A067	N-Term(Dimethyl); K28(Dimethyl)	2888.6				0	0
LKPYFLTDGTGTVTPANASGINDGAAAVVLMK	Q9BWD1	N-Term(Dimethyl); K2(Dimethyl); K32(Dimethyl)	3276.75				0	0
EQDGFTGKEEVVEQGELNATEEVWIPGEGHPESPEPK	P48681	N-Term(Dimethyl); K8(Dimethyl); K37(Dimethyl)	4161.96	1.48294	1.37251	1.08168	0	1
FLAAGTHLGGTNLDFQMEQYIYK	C9J9K3	N-Term(Dimethyl); K23(Dimethyl)	2673.33				0	0
LMSSNSTDLPLNIECFMNDKDVSGK	Q92598	N-Term(Dimethyl); C15(Carbamidomethyl); K20(Dimethyl); K25(Dimethyl)	2899.38	1.40179	1.15562	1.21439	0	1
QLLLTADDRVNPCIGGVILFHETLYQK	P04075	N-Term(Dimethyl); C13(Carbamidomethyl); K27(Dimethyl)	3169.7	0.625782	0.720945	0.86898	0	1
IYPHGLVLLDLQSYDGDAQGKEEIDSILNKVEER	P52788	N-Term(Dimethyl); K21(Dimethyl); K30(Dimethyl)	3941.05	0.910267	0.855079	1.06574	0	2
VLQQTLNYINQGVSHALTWK	O95373	N-Term(Dimethyl); K20(Dimethyl)	2369.29	1.19264	1.25998	0.947622	0	0
STGLILDSGATHTTAIPVHDGYVLQQGIVK	O96019	N-Term(Dimethyl); K30(Dimethyl)	3147.69	0.969827	1.04221	0.931595	0	0
FSQMLHPIFEEASDVIKEEFPNENQVVFAR	Q9BS26	N-Term(Dimethyl); K17(Dimethyl)	3606.78	0.868642	0.924338	0.940804	0	1
VVGFHVLGPNAGEVTQGFAAALK	E9PIR7	N-Term(Dimethyl); K23(Dimethyl)	2338.28			0.959348	0	0
GPLTSGSDEENVALPLGDNVLTHNLGIPVLVVCTK	O43237	N-Term(Dimethyl); C33(Carbamidomethyl); K35(Dimethyl)	3684.94	1.31941	1.05975	1.24642	0	0
FENAFLSHVVSQHQALLGTIR	P25705	N-Term(Dimethyl)	2395.28				0	0
VVAEGFDSANGINISPDDKYIYVADILAHEIHVLEK	J3QT77	N-Term(Dimethyl); K19(Dimethyl); K36(Dimethyl)	4039.09	0.93367	0.997296	0.937256	0	1
SNKPIHTIILNPHVHLVGDDAACIAYIR	D6R938;E9PBG7	N-Term(Dimethyl); K3(Dimethyl); C23(Carbamidomethyl)	3193.72				0	0
AITVFSPDGHLFQVEYAQEAVK	O14818	N-Term(Dimethyl); K22(Dimethyl)	2505.3				0	0
AWVWNTHADFADECPKPELLAIR	P43487	N-Term(Dimethyl); C14(Carbamidomethyl); K16(Dimethyl)	2795.39	0.780832	0.899604	0.86895	0	0
SIYVGNVDYGATAEELEAHFHGCGSVNR	Q86U42	N-Term(Dimethyl); C23(Carbamidomethyl)	3080.41				0	0
SNFLNCYVSGFHPSDIEVDLLK	P61769	N-Term(Dimethyl); C6(Carbamidomethyl); K22(Dimethyl)	2610.28	0.307099	0.702942	0.437369	0	0
LAVHPSGVALQDRVPLASQGLGPGSTVLLVVDK	A0A096LNZ9	N-Term(Dimethyl); K33(Dimethyl)	3349.91	0.199469	0.70885	0.281715	0	1
HTGPGILSMANAGPNTNGSQFFICTAK	P62937	N-Term(Dimethyl); C24(Carbamidomethyl); K27(Dimethyl)	2847.39	0.32689	0.564738	0.579487	0	0
VFIYHGSSLGVVAKPSQVLEGEAVGIK	J3KNV4	N-Term(Dimethyl); K14(Dimethyl); K27(Dimethyl)	2868.63	0.931701	0.679593	1.37251	0	0
HIAQLAGNSDLILPVPAFNVINGGSHAGNK	P09104	N-Term(Dimethyl); K30(Dimethyl)	3080.66	0.50996	0.72606	0.703158	0	0
MMVDKDGDVTVTNDGATILSMMDVDHQIAK	P48643	N-Term(Dimethyl); K5(Dimethyl); K30(Dimethyl)	3334.59				0	1
AGEARPGPTAESASGPSEDPSVNFLK	Q13501	N-Term(Dimethyl); K26(Dimethyl)	2627.29	1.458	1.15155	1.26755	0	0
DGVADVSIEDSVISLSGDHCIIGR	P00441	N-Term(Dimethyl); C20(Carbamidomethyl)	2542.24	1.33142	1.22674	1.08655	0	0
TAMSTPHVAEPAENEQDEQDENGAEASADLR	P26038	N-Term(Dimethyl)	3340.44	1.09888	0.865668	1.27083	0	0
NAATEDLWESLENASGKPIAAVMNTWTK	E9PLK3	N-Term(Dimethyl); K17(Dimethyl); K28(Dimethyl)	3131.57	0.927969	0.943508	0.984638	0	0
RFSFSGNTLVSSSADPEGHFETPIWIER	Q14697;E9PKU7	N-Term(Dimethyl)	3194.54				0	1
IQPGSQQADFLDALIVSMDVIQHETIGK	P13010	N-Term(Dimethyl); K28(Dimethyl)	3109.62	1.4712	1.20553	1.22175	0	0
SNEYQLIDCAQYFLDKIDVIK	P63092	N-Term(Dimethyl); C9(Carbamidomethyl); K16(Dimethyl); K21(Dimethyl)	2659.36	0.526463	0.443459	1.18851	0	1
NINADEAAAMGAVYQAAALSK	A0A087X054	N-Term(Dimethyl); K21(Dimethyl)	2135.07	0.633348	0.820698	0.772588	0	0
FQSSAVMALQEASEAYLVGLFEDTNLCAIHAK	Q71DI3	N-Term(Dimethyl); C27(Carbamidomethyl); K32(Dimethyl)	3569.76				0	0
EYYSEADASHCIQQILESVNHCHLNGIVHR	D6R938	N-Term(Dimethyl); C11(Carbamidomethyl); C22(Carbamidomethyl)	3607.67	1.1046	0.966575	1.14409	0	0
GPEAGYVATPIAMVQAAMTLLSDASHLPK	Q8NBX0	N-Term(Dimethyl); K29(Dimethyl)	2995.56	0.809913	0.888585	0.912491	0	0
HTGPGILSMANAGPNTNGSQFFICTAK	P62937	N-Term(Dimethyl); N17(Deamidated); C24(Carbamidomethyl); K27(Dimethyl)	2848.37				0	0
SLAGSSGPGASSGTSGDHGELVVR	E9PK01	N-Term(Dimethyl)	2213.07				0	0
TAVIDHHNYDISDLGQHTLIVADTENLLK	A0A0C4DGS1	N-Term(Dimethyl); K29(Dimethyl)	3301.69	0.878043	0.974717	0.901832	0	0
SWVNQMESQTGEASKLPYDVTPEQALAHEEVK	P46940	N-Term(Dimethyl); K15(Dimethyl); K32(Dimethyl)	3685.79	1.31353	1.05465	1.16483	0	1
QFAPIHAEAPEFMEMSVEQEILVTGIK	P06576	N-Term(Dimethyl); K27(Dimethyl)	3100.56	1.32463	1.16086	1.14236	0	0
QRHELLLGAGSGPGAGQQQATPGALLQAGPPR	Q96DI7	N-Term(Dimethyl)	3161.68	1.09286	1.01956	1.0731	0	1
DLGLSESGEDVNAAILDESGKK	P13667	N-Term(Dimethyl); K21(Dimethyl); K22(Dimethyl)	2331.19			1.22425	0	1
SQIVMLEASAENILQQDFCHAIK	Q8TCS8	N-Term(Dimethyl); C19(Carbamidomethyl); K23(Dimethyl)	2701.37	1.37604	1.20611	1.14217	0	0
VAEEHAPSIVFIDEIDAIGTKR	P62191	N-Term(Dimethyl); K21(Dimethyl)	2466.32				0	1
SLQDIIAILGMDELSEEDKLTVSR	P06576	N-Term(Dimethyl); K19(Dimethyl)	2731.43	1.40655	1.10919	1.26952	0	1
AAAYNLVQHGITNLCVIGGDGSLTGANIFR	P17858	N-Term(Dimethyl); C15(Carbamidomethyl)	3130.59	0.703523	0.673127	1.04633	0	0
NQNVHMESEVYDTPENIVHGSGSQLFDHVAECLGDFMEK	P19367	N-Term(Dimethyl); C32(Carbamidomethyl); K39(Dimethyl)	4519.01				0	0
LLLAGYDDFNCNVWDTLKGDR	Q9HAV0	N-Term(Dimethyl); C11(Carbamidomethyl); K18(Dimethyl)	2541.24			1.09632	0	1
ADHQPLTEASYVNLPTIALCNTDSPLR	C9J9K3	N-Term(Dimethyl); C20(Carbamidomethyl)	3024.5	1.2334	1.10639	1.11605	0	0
AVCVLKGDGPVQGIINFEQK	P00441	N-Term(Dimethyl); C3(Carbamidomethyl); K6(Dimethyl); K20(Dimethyl)	2256.24	0.783009	0.972823	0.80579	0	1
FSFSGNTLVSSSADPEGHFETPIWIER	Q14697;E9PKU7	N-Term(Dimethyl)	3038.45				0	0
SLADELALVDVLEDKLK	P07195	N-Term(Dimethyl); K15(Dimethyl); K17(Dimethyl)	1955.13	0.807226	0.865797	0.9334	0	1
AQVQALGLAEAQPMAVVQSVPGAHPVPVYAFSIK	P29590	N-Term(Dimethyl); K34(Dimethyl)	3529.91	0.319233	0.634394	0.503776	0	0
AGYTDKVVIGMDVAASEFFR	P06733	N-Term(Dimethyl); K6(Dimethyl)	2232.13	0.603393	0.781182	0.799494	0	1
LVSQTGPVHAPIFTMSVEVDGNSFEASGPSKK	Q12906	N-Term(Dimethyl); K31(Dimethyl); K32(Dimethyl)	3400.74				0	1
QTIGNSCGTIGLIHAVANNQDKLGFEDGSVLK	P09936	N-Term(Dimethyl); N5(Deamidated); C7(Carbamidomethyl); K22(Dimethyl); K32(Dimethyl)	3441.76	0.720438	0.87557	0.823749	0	1
EVLAGRPLFPHVLCHNCAVEFNFGQK	Q00839	N-Term(Dimethyl); C14(Carbamidomethyl); C17(Carbamidomethyl); K26(Dimethyl)	3095.56	0.959483	0.944678	1.01682	0	0
DITDTLVAVTISEGAHHLDLR	P42785	N-Term(Dimethyl)	2304.21	0.563762	0.755432	0.728261	0	0
AFDYFNLAANAGNSHAMAFLGK	Q9UBV2	N-Term(Dimethyl); K22(Dimethyl)	2386.16	0.707407	0.861587	0.821977	0	0
EAGLAHLCEFIEDCEHTVLATK	Q9UBF2	N-Term(Dimethyl); C8(Carbamidomethyl); C14(Carbamidomethyl); K22(Dimethyl)	2599.24	0.951703	0.971907	0.980315	0	0
NIDNPALADIYTEHAHQVVVAK	O75083	N-Term(Dimethyl); K22(Dimethyl)	2474.3	1.83499	1.48025	1.24105	0	0
EAESCDCLQGFQLTHSLGGGTGSGMGTLLISK	P07437;P68371;P04350	N-Term(Dimethyl); C5(Carbamidomethyl); C7(Carbamidomethyl); K32(Dimethyl)	3367.59				0	0
MVAAATNNLCEAANAAVQGHASQEK	Q9Y490	N-Term(Dimethyl); C10(Carbamidomethyl); K25(Dimethyl)	2612.25	1.14945	1.06226	0.924095	0	0
LADDVDLEQVANETHGHVGADLAALCSEAALQAIR	P55072	N-Term(Dimethyl); C26(Carbamidomethyl)	3700.82	1.27314	1.09016	1.16916	0	0
VDLNSNGFICDYELHELFK	P13797	N-Term(Dimethyl); N6(Deamidated); C10(Carbamidomethyl); K19(Dimethyl)	2370.12	0.779024	0.71807	1.08611	0	0
NWSAAGNAFCQAAQLHLQLQSK	P54920	N-Term(Dimethyl); C10(Carbamidomethyl); K22(Dimethyl)	2499.25	0.889406	1.08255	0.822508	0	0
LADDVDLEQVANETHGHVGADLAALCSEAALQAIR	P55072	N-Term(Dimethyl); N12(Deamidated); C26(Carbamidomethyl)	3701.82				0	0
GILGYTEHQVVSSDFNSDTHSSTFDAGAGIALNDHFVK	P04406	N-Term(Dimethyl); N16(Deamidated); K38(Dimethyl)	4093.95				0	0
SGGTEGLLAEKLEALITQTR	Q9UHB9	N-Term(Dimethyl); K11(Dimethyl)	2143.19				0	1
GIVDQSQQAYQEAFEISKK	P63104	N-Term(Dimethyl); K18(Dimethyl); K19(Dimethyl)	2253.17			1.10254	0	1
AGESVLVHGASGGVGLAACQIAR	Q08257	N-Term(Dimethyl); C19(Carbamidomethyl)	2208.15	0.882783	0.919685	0.960957	0	0
TGQATVASGIPAGWMGLDCGPESSKK	P00558	N-Term(Dimethyl); C19(Carbamidomethyl); K25(Dimethyl); K26(Dimethyl)	2689.33	0.431313	0.703721	0.613594	0	1
QLHEQAMQFGQLLTHLDTTQQMIANSLK	Q13561	N-Term(Dimethyl); K28(Dimethyl)	3280.68				0	0
QLQELEDKQNADISAMQDTINKLENELR	P07196	N-Term(Dimethyl); K8(Dimethyl); K22(Dimethyl)	3370.7	2.24096	1.78476	1.25702	0	2
LVAFCPFASSQVALENANAVSEGVVHEDLR	O00567	N-Term(Dimethyl); C5(Carbamidomethyl); Q11(Deamidated)	3258.62	1.12188	0.993782	1.13017	0	0
SDPPQEAAQFTSQVIILNHPGQISAGYSPVIDCHTAHIACK	Q05639	N-Term(Dimethyl); C33(Carbamidomethyl); C40(Carbamidomethyl); K41(Dimethyl)	4514.2				0	0
QGSKDPAEGDGAQPEETPR	E9PKU7	N-Term(Dimethyl); K4(Dimethyl)	2024.94	0.857139	0.840094	1.02144	0	1
VAILVDDMADTCGTICHAADK	P11908;P60891	N-Term(Dimethyl); C12(Carbamidomethyl); C16(Carbamidomethyl); K21(Dimethyl)	2332.09				0	0
NMITGTSQADCAVLIVAAGVGEFEAGISK	P68104;Q05639	N-Term(Dimethyl); C11(Carbamidomethyl); K29(Dimethyl)	2965.49				0	0
ALAPTWEQLALGLEHSETVK	Q86UY0	N-Term(Dimethyl); K20(Dimethyl)	2249.21	0.923939	0.882393	0.88185	0	0
QEELDAMTQALQEQDSAFGAVHAQMHAAVGQLGR	P29590	N-Term(Dimethyl)	3665.74	1.15047			0	0
NMITGTSQADCAVLIVAAGVGEFEAGISKNGQTR	P68104;Q05639	N-Term(Dimethyl); C11(Carbamidomethyl); K29(Dimethyl); Q32(Deamidated)	3522.76				0	1
AYHEQLSVAEITNACFEPANQMVK	P68363;Q71U36	N-Term(Dimethyl); C15(Carbamidomethyl); K24(Dimethyl)	2806.35				0	0
TDNAEWSIQGMTALPPDIERPYK	Q6UVY6	N-Term(Dimethyl); K23(Dimethyl)	2688.32	0.520857	0.654348	0.79689	0	0
TAMSTPHVAEPAENEQDEQDENGAEASADLR	P26038	N-Term(Dimethyl); N22(Deamidated)	3341.43				0	0
VVGIHMQGLGCDEMLQGFAVAVK	P00390	N-Term(Dimethyl); C11(Carbamidomethyl); K23(Dimethyl)	2515.28	0.827076	0.841013	0.984536	0	0
AVHANPPTLLLPVAHMLEVGDPDDLAFLRK	Q13724	N-Term(Dimethyl); K30(Dimethyl)	3305.81	0.579445	0.598044	0.969991	0	1
EDGNEEDKENQGDETQGQQPPQR	P67809	N-Term(Dimethyl); K8(Dimethyl)	2684.16	1.21911	1.10419	1.07081	0	1
YASICQQNGIVPIVEPEILPDGDHDLKR	P04075	N-Term(Dimethyl); C5(Carbamidomethyl); K27(Dimethyl)	3232.66	0.825381	0.980364	0.860805	0	1
APVSALPLAPNHLGGGAVVLGAESHASK	Q13190	N-Term(Dimethyl); K28(Dimethyl)	2676.48				0	0
DIQNTQCLLNVEHLSAGCPHVTLQFADSK	Q7KZF4	N-Term(Dimethyl); C7(Carbamidomethyl); C18(Carbamidomethyl); K29(Dimethyl)	3351.63	0.734184	0.664015	1.10692	0	0
CEAFGWHAIIVDGHSVEELCK	P29401	N-Term(Dimethyl); C1(Carbamidomethyl); C20(Carbamidomethyl); K21(Dimethyl)	2513.18	0.957543	0.865506	1.10759	0	0
SINPDEAVAYGAAVQAAILSGDK	P11142	N-Term(Dimethyl); K23(Dimethyl)	2316.2	0.965276	0.960761	1.00583	0	0
TSQENISFETMYDVLSTKPVLNK	E7EMM4	N-Term(Dimethyl); K18(Dimethyl); K23(Dimethyl)	2728.4	0.618217	0.717506	0.86259	0	0
VETGVLKPGMVVTFAPVNVTTEVK	P68104	N-Term(Dimethyl); K7(Dimethyl); K24(Dimethyl)	2599.47	0.846411	0.986531	0.939247	0	0
SGFEPASLKEEVGEEAIVELVENGKK	P35579	N-Term(Dimethyl); K9(Dimethyl); K25(Dimethyl); K26(Dimethyl)	2900.53	1.16798	1.09872	1.06423	0	2
ISVAGVTSSNVGYLAHAIHQVTK	P00505	N-Term(Dimethyl); K23(Dimethyl)	2408.32	1.33423	1.66463	0.802418	0	0
HLNYTEFTQFLQELQLEHAR	O75746	N-Term(Dimethyl)	2545.28	0.853076	1.02334	0.834558	0	0
LCYVALDFEQEMATAASSSSLEK	P60709	N-Term(Dimethyl); C2(Carbamidomethyl); K23(Dimethyl)	2606.23	1.14268	1.06609	1.03894	0	0
YASICQQNGIVPIVEPEILPDGDHDLKR	P04075	N-Term(Dimethyl); C5(Carbamidomethyl); N8(Deamidated); K27(Dimethyl)	3233.64	0.698426	0.769603	0.850752	0	1
ASQKPQPNFPSPEYMIFDHEFTK	O60763	N-Term(Dimethyl); K4(Dimethyl); K23(Dimethyl)	2822.39				0	0
TFTTQETITNAETAKEWFLQAAK	P06744	N-Term(Dimethyl); K15(Dimethyl); K23(Dimethyl)	2713.41				0	1
QDLPNAMAISEMTDKLGLQSLR	P18085	N-Term(Dimethyl); K15(Dimethyl)	2487.29	1.07155	1.06452	1.00773	0	1
TFNQVEIKPEMIGHYLGEFSITYKPVK	K7EM56	N-Term(Dimethyl); K8(Dimethyl); K24(Dimethyl); K27(Dimethyl)	3280.76				0	0
TLGLYGKDQQEAALVDMVNDGVEDLR	P09211	N-Term(Dimethyl); K7(Dimethyl)	2905.46	0.688671	0.93806	0.734971	0	1
GPLINSEFYTGWLDHWGQPHSTIK	P16278	N-Term(Dimethyl); K24(Dimethyl)	2839.42	0.587093	0.915452	0.642038	0	0
NNRQPYAVSELAGHQTSAESWGTGR	P36578	N-Term(Dimethyl)	2744.31	1.26026	1.07573	1.17287	0	1
VAMQDATAQMAMLQFISSGLSK	Q99798	N-Term(Dimethyl); K22(Dimethyl)	2384.2				0	0
CSPTLLLLNGQAACHMAQGR	A0A087X0I4	N-Term(Dimethyl); C1(Carbamidomethyl); N9(Deamidated); C14(Carbamidomethyl)	2227.07	1.23794	1.20518	1.02834	0	0
AFLADPSAFVAAAPVAAATTAAPAAAAAPAK	P05388	N-Term(Dimethyl); K31(Dimethyl)	2808.52	1.06145	1.06441	0.99835	0	0
MYGISLCQAILDETKGDYEK	P04083	N-Term(Dimethyl); C7(Carbamidomethyl); K15(Dimethyl); K20(Dimethyl)	2418.18	0.464545	0.512509	0.907434	0	1
HLNFLTSEQALADFAELIK	P42785	N-Term(Dimethyl); K19(Dimethyl)	2216.19	0.528479	0.694506	0.761799	0	0
SICTTVLELLDKYLIANATNPESK	P27348	N-Term(Dimethyl); C3(Carbamidomethyl); K12(Dimethyl); K24(Dimethyl)	2777.49				0	1
LTKEEILENWNMFVGSQATNYGEDLTK	Q15293	N-Term(Dimethyl); K3(Dimethyl); K27(Dimethyl)	3214.59				0	1
FALPSPQHILGLPVGQHIYLSAR	P00387	N-Term(Dimethyl)	2542.41	0.433271	0.649926	0.667397	0	0
RPLIDQVVQTALSETQDPEEVSVTVK	Q00610	N-Term(Dimethyl); K26(Dimethyl)	2937.57	1.07456	1.01798	1.05676	0	0
SFIKDYPVVSIEDPFDQDDWGAWQK	P06733	N-Term(Dimethyl); K4(Dimethyl); K25(Dimethyl)	3069.48	0.795797	0.719698	1.10698	0	1
LASVPAGGAVAVSAAPGSAAPAAGSAPAAAEEK	P05387	N-Term(Dimethyl); K33(Dimethyl)	2830.49	1.11285	1.29321	0.8615	0	0
ELLTEFGYKGEETPVIVGSALCALEGR	P49411	N-Term(Dimethyl); K9(Dimethyl); C22(Carbamidomethyl)	2994.55				0	1
VAEKLDEIYVAGLVAHSDLDER	O60506	N-Term(Dimethyl); K4(Dimethyl)	2498.31	1.00678	1.08917	0.925393	0	1
GPSFDVQVGLHELLGHGSGK	Q9NY33	N-Term(Dimethyl); K20(Dimethyl)	2090.1				0	0
VIHDNFGIVEGLMTTVHAITATQK	P04406	N-Term(Dimethyl); M13(Oxidation); K24(Dimethyl)	2667.41	0.783009	0.951117	0.82418	0	0
EDEEESLNEVGYDDIGGCRK	P55072	N-Term(Dimethyl); C18(Carbamidomethyl); K20(Dimethyl)	2370.03	0.927898	0.979995	0.947906	0	1
SGETEDTFIADLVVGLCTGQIK	P13929;P09104;P06733	N-Term(Dimethyl); C17(Carbamidomethyl); K22(Dimethyl)	2409.22				0	0
AIMKDPDDHTVCHLLFANQTEK	P00387	N-Term(Dimethyl); K4(Dimethyl); C12(Carbamidomethyl); K22(Dimethyl)	2667.32	0.715081	0.7698	0.843958	0	1
EVHDQLLQLHSIQLQLHAK	Q9HD26	N-Term(Dimethyl); K19(Dimethyl)	2306.29	0.995452	1.08604	0.917618	0	0
CSPTLLLLNGQAACHMAQGR	A0A087X0I4	N-Term(Dimethyl); C1(Carbamidomethyl); C14(Carbamidomethyl)	2226.09	0.798134	1.03887	0.769138	0	0
SWDFGAFQSSSATDSSMEEIFQHLMAYHQEASK	P20591	N-Term(Dimethyl); K33(Dimethyl)	3808.68				0	0
NVAADIAVQLCESVANKLEGK	P08240	N-Term(Dimethyl); C11(Carbamidomethyl); K17(Dimethyl); K21(Dimethyl)	2313.24	0.960185	0.931077	1.03242	0	1
EGGQYGLVAACAAGGQGHAMIVEAYPK	P55084	N-Term(Dimethyl); C11(Carbamidomethyl); K27(Dimethyl)	2761.33	1.23108	1.13143	1.0893	0	0
HLCQQLQAEQAAAEKR	H0YFY6;A0A087WY61	N-Term(Dimethyl); C3(Carbamidomethyl); K15(Dimethyl)	1937				0	1
EQWLNNMQIPEKLEDLEVIQHR	Q01082	N-Term(Dimethyl); K12(Dimethyl)	2818.44	0.914357	0.988921	0.925643	0	1
VHTVEDYQAIVDAEWNILYDKLEK	Q99832	N-Term(Dimethyl); K21(Dimethyl); K24(Dimethyl)	2975.53				0	1
LLEMNLMHAPQVADAILGNQMFTHYDR	Q00610	N-Term(Dimethyl)	3156.53	1.30334	1.03074	1.2659	0	0
DSLGDFIEHYAQLGPSSPEQLAAGAEEGGGPR	Q96QR8	N-Term(Dimethyl)	3283.54	1.01072	0.917221	1.10318	0	0
AYAANSHQGQMLAQYIESFTQGSIEAHKR	Q9NY33	N-Term(Dimethyl); K28(Dimethyl)	3292.6	0.851533	0.941172	0.905778	0	1
AQIQQFHSQIAAQTSASVLAEELHK	Q86UP2	N-Term(Dimethyl); K25(Dimethyl)	2791.47	0.902268	0.927378	0.97402	0	0
TGPAATTLPDGAAAESLVESSEVAVIGFFK	P07237	N-Term(Dimethyl); K30(Dimethyl)	2991.55	0.676946	0.843544	0.803407	0	0
FTLDCTHPVEDGIMDAANFEQFLQER	P35268	N-Term(Dimethyl); C5(Carbamidomethyl); N18(Deamidated)	3112.42				0	0
QGQYDPPPGASNILGLEASGHVAELGPGCQGHWK	Q53FA7	N-Term(Dimethyl); C29(Carbamidomethyl); K34(Dimethyl)	3583.73	0.656807	0.693523	0.948126	0	0
MKYPHLVAGALAASAPVLAVAGLGDSNQFFR	Q9UHL4	N-Term(Dimethyl); K2(Dimethyl)	3227.73	0.210866		0.274605	0	1
GVMTTGSDIGFSVIQAHDVQNPLHFGEMK	Q8TEM1	N-Term(Dimethyl); K29(Dimethyl)	3171.56				0	0
VAGHPNIVINNAAGNFISPTER	Q16698	N-Term(Dimethyl)	2319.22	1.40776	1.01689	1.38593	0	0
ECEHCDCLQGFQLTHSLGGGTGSGMGTLLISK	Q9BUF5	N-Term(Dimethyl); C2(Carbamidomethyl); C5(Carbamidomethyl); C7(Carbamidomethyl); K32(Dimethyl)	3506.62			1.04749	0	0
ILNHVLQHAEPGNAQSVLEAIDTYCEQK	P21964	N-Term(Dimethyl); C25(Carbamidomethyl); K28(Dimethyl)	3233.62				0	0
YLLHGLECVVAMHQAQLISK	P55010	N-Term(Dimethyl); C8(Carbamidomethyl); K20(Dimethyl)	2366.26				0	0
AQLNIGNVLPVGTMPEGTIVCCLEEKPGDR	P62917	N-Term(Dimethyl); C21(Carbamidomethyl); C22(Carbamidomethyl); K26(Dimethyl)	3323.67				0	0
MFLGDNAHLSIINEYLSQSYQK	P46940	N-Term(Dimethyl); K22(Dimethyl)	2627.31	0.806325	0.89897	0.897953	0	0
LAQAHPAGPPTLDPVNDLQLK	Q15477	N-Term(Dimethyl); K21(Dimethyl)	2251.24	1.01645	1.1106	0.916251	0	0
GVNADKVGIEAAEMLLANLR	O00442	N-Term(Dimethyl); K6(Dimethyl)	2140.18	0.393215	0.45623	0.862851	0	1
EEGPYEVEVTYDGVPVPGSPFPLEAVAPTKPSK	P21333	N-Term(Dimethyl); K30(Dimethyl); K33(Dimethyl)	3569.84				0	0
FTASAGIQVVGDDLTVTNPK	P06733	N-Term(Dimethyl); K20(Dimethyl)	2089.11	0.621558	1.00789	0.850245	0	0
QVQSLTCEVDALKGTNESLER	P08670	N-Term(Dimethyl); C7(Carbamidomethyl); K13(Dimethyl)	2433.23	0.602215	0.885272	0.839093	0	1
NLNTLCWAIGSISGAMHEEDEKR	O14980	N-Term(Dimethyl); C6(Carbamidomethyl); K22(Dimethyl)	2687.28	0.885426	0.933435	0.949636	0	1
QAFTDVATGSLGQGLGAACGMAYTGK	P29401	N-Term(Dimethyl); Q13(Deamidated); C19(Carbamidomethyl); K26(Dimethyl)	2589.24				0	0
DASIVGFFDDSFSEAHSEFLK	P30101	N-Term(Dimethyl); K21(Dimethyl)	2404.13	0.726375	0.912761	0.796696	0	0
FQSSAVMALQEASEAYLVGLFEDTNLCAIHAK	Q71DI3	N-Term(Dimethyl); M7(Oxidation); C27(Carbamidomethyl); K32(Dimethyl)	3585.75				0	0
TNHIGHTGYLNTVTVSPDGSLCASGGK	P63244	N-Term(Dimethyl); C22(Carbamidomethyl); K27(Dimethyl)	2799.37	0.810222	0.839772	0.965899	0	0
ALGALVDSCAPGLCPDWDSWDASKPVTNAR	P21333	N-Term(Dimethyl); C9(Carbamidomethyl); C14(Carbamidomethyl); K24(Dimethyl)	3285.57				0	0
QFLQAAEAIDDIPFGITSNSDVFSK	P07237	N-Term(Dimethyl); K25(Dimethyl)	2769.39	0.744349	0.898853	0.729647	0	0
ITKFENAFLSHVVSQHQALLGTIR	P25705	N-Term(Dimethyl); K3(Dimethyl)	2765.54	1.03599	0.822333	1.26124	0	1
GVQDIVVGEGTHFLIPWVQKPIIFDCR	P35232	N-Term(Dimethyl); K20(Dimethyl); C26(Carbamidomethyl)	3179.69	0.943691	0.851982	1.10889	0	0
NFEHLIPDAPELIHDFLVNEK	P53618	N-Term(Dimethyl); K21(Dimethyl)	2546.32				0	0
SGPFGQIFRPDNFVFGQSGAGNNWAK	Q9BVA1;Q13885;P07437;P68371;P04350	N-Term(Dimethyl); K26(Dimethyl)	2854.4				0	0
APVQPQQSPAAAPGGTDEKPSGK	Q13200	N-Term(Dimethyl); K19(Dimethyl); K23(Dimethyl)	2302.2				0	0
AEGSDVANAVLDGADCIMLSGETAK	P14618;H3BR70	N-Term(Dimethyl); N8(Deamidated); C16(Carbamidomethyl); K25(Dimethyl)	2551.19				0	0
ALDLFSDNAPPPELLEIINEDIAKR	Q15084	N-Term(Dimethyl); K24(Dimethyl)	2849.52	0.830842	1.05932	0.828058	0	1
FISDKDASIVGFFDDSFSEAHSEFLK	P30101	N-Term(Dimethyl); K5(Dimethyl); K26(Dimethyl)	3022.48	0.644978	0.763222	0.846025	0	1
VDLNSNGFICDYELHELFK	P13797	N-Term(Dimethyl); C10(Carbamidomethyl); K19(Dimethyl)	2369.14	0.663094	0.703699	0.94336	0	0
VILPNFLANGGDGFQMIKDELLR	P21589	N-Term(Dimethyl); K18(Dimethyl)	2616.41	0.409124	0.939923	0.435764	0	1
GQYISPFHDIPIYADKDVFHMVVEVPR	Q15181	N-Term(Dimethyl); K16(Dimethyl)	3228.64				0	1
MQMNTNQLTSIHADLCQLCLLAK	Q9UNS2	N-Term(Dimethyl); C16(Carbamidomethyl); C19(Carbamidomethyl); K23(Dimethyl)	2759.36				0	0
TTGIVMDSGDGVTHTVPIYEGYALPHAILR	P60709	N-Term(Dimethyl)	3211.64				0	0
NLAMEATYINHNFSQQCLR	O15371	N-Term(Dimethyl); C17(Carbamidomethyl)	2338.1	1.30658	1.13123	1.15631	0	0
LQALANEQAAAAHELEK	Q86UP2	N-Term(Dimethyl); K17(Dimethyl)	1862.99	1.75872	1.53	1.15078	0	0
ILSISADIETIGEILKK	P61978;Q5T6W2	N-Term(Dimethyl); K16(Dimethyl); K17(Dimethyl)	1927.16				0	1
SSSADFGTFNTSQSHQTASAVSK	C9J2I0	N-Term(Dimethyl); K23(Dimethyl)	2401.12	0.907183	0.905171	1.00335	0	0
QAFTDVATGSLGQGLGAACGMAYTGK	P29401	N-Term(Dimethyl); C19(Carbamidomethyl); K26(Dimethyl)	2588.23	1.09024	0.944386	1.15574	0	0
SLAEDFAEQPIKDAVITVPVFFNQAER	A0A087X054	N-Term(Dimethyl); K12(Dimethyl)	3090.61				0	1
AIVDCGFEHPSEVQHECIPQAILGMDVLCQAK	O00148;Q13838	N-Term(Dimethyl); C5(Carbamidomethyl); C17(Carbamidomethyl); C29(Carbamidomethyl); K32(Dimethyl)	3707.77				0	0
LGGSLADSYLDEGFLLDKK	P78371	N-Term(Dimethyl); K18(Dimethyl); K19(Dimethyl)	2125.14				0	1
GGVSAVAGGVTAVGSAVVNKVPLTGK	Q8WUH6	N-Term(Dimethyl); K20(Dimethyl); K26(Dimethyl)	2379.39				0	1
IIPTLEEGLQLPSPTATSQLPLESDAVECLNYQHYK	P61978	N-Term(Dimethyl); C29(Carbamidomethyl); K36(Dimethyl)	4111.09	1.05572	1.03733	1.01888	0	0
ADLEMQIESLTEELAYLKK	P13645	N-Term(Dimethyl); K18(Dimethyl); K19(Dimethyl)	2308.23				0	1
TYNTDVPLVLMNSFNTDEDTKK	A0A087WYS1	N-Term(Dimethyl); K21(Dimethyl); K22(Dimethyl)	2629.29	0.884287	1.08643	0.814857	0	1
VEDMAELTCLNEASVLHNLK	P35579;P35580	N-Term(Dimethyl); C9(Carbamidomethyl); K20(Dimethyl)	2342.17				0	0
FLSESLMWHISSQVAELKK	Q9Y2A7	N-Term(Dimethyl); K18(Dimethyl); K19(Dimethyl)	2317.25	1.15212	0.987093	1.1685	0	1
CPEALFQPSFLGMESCGIHETTFNSIMK	P60709	N-Term(Dimethyl); C1(Carbamidomethyl); C16(Carbamidomethyl); K28(Dimethyl)	3287.52				0	0
FNVLHWHIVDDQSFPYQSITFPELSNK	P07686	N-Term(Dimethyl); K27(Dimethyl)	3317.65	0.39486	0.686039	0.576214	0	0
QVLGQMVIDEELLGDGHSYSPR	P28070	N-Term(Dimethyl)	2471.22				0	0
ETFASTASQLHSNVVNYVQQIVAPK	Q9H4A4	N-Term(Dimethyl); K25(Dimethyl)	2787.47				0	0
ALQLAQRPVSLLASPWTSPTWLK	P04062	N-Term(Dimethyl); K23(Dimethyl)	2619.5	0.927401	1.1234	0.826457	0	0
FLSQPFQVAEVFTGHMGK	P06576	N-Term(Dimethyl); K18(Dimethyl)	2079.05	1.2635	1.17234	1.07898	0	0
TFSHELSDFGLESTAGEIPVVAIR	P30101	N-Term(Dimethyl)	2603.33	0.785116	0.886887	0.886247	0	0
TWPDHGVPSDPGGVLDFLEEVHHK	Q06124	N-Term(Dimethyl); K24(Dimethyl)	2724.34	1.30649	1.13858	1.14877	0	0
HLVMGDIPAAVNAFQEAASLLGK	P49321	N-Term(Dimethyl); K23(Dimethyl)	2408.29	1.47932	1.08523	1.36468	0	0
TALLDAAGVASLLTTAEVVVTEIPK	P10809	N-Term(Dimethyl); K25(Dimethyl)	2538.46				0	0
FVHTSVHGVGHSFVQSAFK	Q96G03	N-Term(Dimethyl); K19(Dimethyl)	2127.11	0.405687	0.596563	0.680807	0	0
VAEEHAPSIVFIDEIDAIGTK	P62191	N-Term(Dimethyl); K21(Dimethyl)	2310.22	0.887054	0.958144	0.926847	0	0
GSQFAYGDHQSPNTAITQMTFLR	P05997	N-Term(Dimethyl)	2598.24	0.715828	0.84741	0.845677	0	0
LHHVSSLAWLDEHTLVTTSHDASVK	O75083	N-Term(Dimethyl); K25(Dimethyl)	2839.47	0.833472	0.829565	1.00584	0	0
FLYEELGLDSTSVFEDLKK	Q4J6C6	N-Term(Dimethyl); K18(Dimethyl); K19(Dimethyl)	2317.21	0.568378	0.659772	0.862447	0	1
QKSDAEEDGGTVSQEEEDRKPK	P27824	N-Term(Dimethyl); K2(Dimethyl); K20(Dimethyl); K22(Dimethyl)	2574.24	0.924862	1.113	0.881353	0	2
LADVDKDGLLDDEEFALANHLIK	Q9H4M9	N-Term(Dimethyl); K6(Dimethyl); K23(Dimethyl)	2638.39	1.0055	1.0547	0.954426	0	1
DPDAGIDEAQVEQDAQALFQAGELK	P08758	N-Term(Dimethyl); K25(Dimethyl)	2714.3	0.758368	1.10234	0.731116	0	0
ETAIELGYLTAEQFDEWVKPK	P07954	N-Term(Dimethyl); K19(Dimethyl); K21(Dimethyl)	2551.33				0	0
GSSCFECTHYQSFLEYR	P21964	N-Term(Dimethyl); C4(Carbamidomethyl); C7(Carbamidomethyl)	2198.92	0.716031	0.826386	0.867436	0	0
FWEVISDEHGIDPTGSYHGDSDLQLER	Q9BVA1;Q13885	N-Term(Dimethyl)	3130.43				0	0
ELNELVSAIEEHFFQPQK	Q96G03	N-Term(Dimethyl); K18(Dimethyl)	2214.14	0.740246	0.798297	0.928326	0	0
EKLCYVALDFEQEMATAASSSSLEK	P60709	N-Term(Dimethyl); K2(Dimethyl); C4(Carbamidomethyl); K25(Dimethyl)	2891.39	0.908935	0.791577	1.14955	0	1
IQIASESSGIPERPCVLTGTPESIEQAKR	Q96I24	N-Term(Dimethyl); C15(Carbamidomethyl); K28(Dimethyl)	3209.68	1.18749	1.37547	0.864312	0	1
AFGFSHLEALLDDSKELQR	Q96FW1	N-Term(Dimethyl); K15(Dimethyl)	2232.16	0.505105	0.614765	0.82255	0	1
THSDSKPYGPMSVGLDFSLPGMEHVYGIPEHADNLR	Q14697;E9PKU7	N-Term(Dimethyl); K6(Dimethyl)	4009.92				0	0
RKLEGDSTDLSDQIAELQAQIAELK	P35579	N-Term(Dimethyl); K2(Dimethyl); K25(Dimethyl)	2855.52	1.13971	1.14165	0.999426	0	2
GGLSTFFEAQDALSAIHQK	Q96KP1	N-Term(Dimethyl); K19(Dimethyl)	2076.07	0.812091	0.895103	0.908281	0	0
IWNVHSVLNVLHSLVDK	Q9Y262	N-Term(Dimethyl); K17(Dimethyl)	2029.15	1.02605	0.951199	1.07991	0	0
FGAVFLWDSGSSVGEITGHNK	O75083	N-Term(Dimethyl); K21(Dimethyl)	2264.13				0	0
WSGPLSLQEVDEQPQHPLHVTYAGAAVDELGK	P30086	N-Term(Dimethyl); K32(Dimethyl)	3527.76	0.629007	1.00725	0.625186	0	0
TIFTGHTAVVEDVSWHLLHESLFGSVADDQK	Q09028	N-Term(Dimethyl); K31(Dimethyl)	3494.76	1.0863	0.9958	1.09211	0	0
EMEENFAVEAANYQDTIGR	P08670	N-Term(Dimethyl)	2214.99				0	0
NGTQVHGTITGVDVSMNTHLK	P62314	N-Term(Dimethyl); K21(Dimethyl)	2265.16	1.13231	1.20684	0.983129	0	0
CIAVHPTQPFILTSSDDMLIK	P35606	N-Term(Dimethyl); C1(Carbamidomethyl); K21(Dimethyl)	2442.26	1.1338	0.990982	1.14541	0	0
ESGSLSPEHGPVVVHCSAGIGR	P18031	N-Term(Dimethyl); C16(Carbamidomethyl)	2260.11	1.08682	1.04856	1.03766	0	0
TGQATVASGIPAGWMGLDCGPESSK	P00558	N-Term(Dimethyl); C19(Carbamidomethyl); K25(Dimethyl)	2533.19	0.358773	0.516195	0.695817	0	0
DKPELQFPFLQDEDTVATLLECK	P09543	N-Term(Dimethyl); K2(Dimethyl); C22(Carbamidomethyl); K23(Dimethyl)	2820.43	0.788456	0.869202	0.908125	0	0
AAFCLEELMMTNPHNHLYCQQYAEVK	Q15006	N-Term(Dimethyl); C4(Carbamidomethyl); C19(Carbamidomethyl); K26(Dimethyl)	3253.48	0.983965	1.08248	0.910013	0	0
HTGPGILSMANAGPNTNGSQFFICTAK	P62937	N-Term(Dimethyl); M9(Oxidation); N17(Deamidated); C24(Carbamidomethyl); K27(Dimethyl)	2864.37	0.515038	0.47372	1.08845	0	0
GGPGSAVSPYPTFNPSSDVAALHK	P04083	N-Term(Dimethyl); K24(Dimethyl)	2412.21	0.889369	0.933562	0.953735	0	0
GDFFPPERPQQLPHGLGGIGMGLGPGGQPIDANHLNK	P52272;M0R019	N-Term(Dimethyl); K37(Dimethyl)	3874.97				0	0
TYQVCNVMDHSQNNWLR	P29320	N-Term(Dimethyl); C5(Carbamidomethyl)	2192.99	0.599203	0.734841	0.816337	0	0
GVDEATIIDILTKR	P04083	N-Term(Dimethyl); K13(Dimethyl)	1599.93	0.936215	0.885111	1.05893	0	1
TIIGSFNGALAAVPVQDLGSTVIK	Q9BWD1	N-Term(Dimethyl); N7(Deamidated); K24(Dimethyl)	2428.38	1.70991	1.20763	1.41752	0	0
RLAPITSDPTEATAVGAVEASFK	P14618	N-Term(Dimethyl); K23(Dimethyl)	2387.28	0.637354	0.890626	0.716431	0	1
FTLTQSEADADILFNFSHFK	Q14166	N-Term(Dimethyl); K20(Dimethyl)	2387.18	1.12093	1.44155	0.778462	0	0
GAHNGQGLGNAFLSHISACDGIFHLTR	Q9NTK5	N-Term(Dimethyl); N4(Deamidated); C19(Carbamidomethyl)	2879.39	0.991291	0.90132	1.10106	0	0
LFDHPESPTPNPTEPLFLAQAEVYK	P49327	N-Term(Dimethyl); K25(Dimethyl)	2896.47				0	0
FMQDPMEIFVDDETKLTLHGLQQYYVK	Q13838	N-Term(Dimethyl); K15(Dimethyl); K27(Dimethyl)	3372.69	1.09032	0.943082	1.15743	0	1
LNCQVIGASVDSHFCHLAWVNTPK	Q06830	N-Term(Dimethyl); C3(Carbamidomethyl); C15(Carbamidomethyl); K24(Dimethyl)	2809.4	0.723925	0.734482	0.986738	0	0
AEISCTDNQDGTCSVSYLPVLPGDYSILVK	P21333	N-Term(Dimethyl); C5(Carbamidomethyl); C13(Carbamidomethyl); K30(Dimethyl)	3357.61				0	0
LSKEETVLATVQALQTASHLSQQADLR	P04844	N-Term(Dimethyl); K3(Dimethyl)	2993.62	0.765094	0.917544	0.834789	0	1
QVGNVTKPTVIISQEGDKVVIR	O15540	N-Term(Dimethyl); K7(Dimethyl); K18(Dimethyl)	2464.44		1.4808		0	1
QPYAVSELAGHQTSAESWGTGR	P36578	N-Term(Dimethyl)	2360.12	1.28155	1.0891	1.15307	0	0
VDNNAIEFLLLQASDGIHHWTPPK	P50583	N-Term(Dimethyl); K24(Dimethyl)	2771.44	0.930888	0.879625	1.05947	0	0
NSSYVHGGVDASGKPQEAVYGQNDIHHK	Q9UN86	N-Term(Dimethyl); K14(Dimethyl); K28(Dimethyl)	3078.5				0	0
SKDDQVTVIGAGVTLHEALAAAELLK	P29401	N-Term(Dimethyl); K2(Dimethyl); K26(Dimethyl)	2733.53	0.835553	0.875823	0.955095	0	1
LAVNNIAGIEEVNMIKDDGTVIHFNNPK	Q96K17	N-Term(Dimethyl); K16(Dimethyl); K28(Dimethyl)	3149.66	0.957942	0.981952	0.976647	0	1
FFEEVNDPAKNDALEMVEETTWQGLK	P49748	N-Term(Dimethyl); K10(Dimethyl); K26(Dimethyl)	3124.52				0	1
VEAVNMAEGIIHDTETKMEEFKDQLPADECNK	P38646	N-Term(Dimethyl); K17(Dimethyl); K22(Dimethyl); C30(Carbamidomethyl); K32(Dimethyl)	3803.81				0	2
GAGYTFGQDISETFNHANGLTLVSR	P67775;P62714	N-Term(Dimethyl); Q8(Deamidated)	2684.3				0	0
SSPSFSSLHYQDAGNYVCETALQEVEGLK	Q13740	N-Term(Dimethyl); C18(Carbamidomethyl); K29(Dimethyl)	3272.52	0.951363	1.08359	0.878965	0	0
TCFETFPDKVAIQLNDTHPALSIPELMR	P11216	N-Term(Dimethyl); C2(Carbamidomethyl); K9(Dimethyl)	3299.67	1.15382	1.03074	1.12067	0	1
HRDFVAEPMGEKPVGSLAGIGEVLGK	O75531	N-Term(Dimethyl); K12(Dimethyl); K26(Dimethyl)	2777.49	0.408143			0	1
CPVTVCGDVHGQFHDLMELFR	P67775;P62714	N-Term(Dimethyl); C1(Carbamidomethyl); C6(Carbamidomethyl)	2545.18				0	0
MKDALDYLKDFFSNVR	O95786	N-Term(Dimethyl); K2(Dimethyl); K9(Dimethyl)	2046.07	0.24072	0.737363	0.337312	0	2
VDKGVVPLAGTNGETTTQGLDGLSER	P04075	N-Term(Dimethyl); K3(Dimethyl)	2670.39	0.616744	0.808891	0.726966	0	1
ESTGAQVQVAGDMLPNSTER	Q15365;Q15366;F8VZX2	N-Term(Dimethyl)	2118.01				0	0
AFQYVETHGEVCPANWTPDSPTIKPSPAASK	P30048	N-Term(Dimethyl); C12(Carbamidomethyl); K24(Dimethyl); K31(Dimethyl)	3469.7				0	0
AKFYPEDVSEELIQDITQR	P26038	N-Term(Dimethyl); K2(Dimethyl)	2337.19	1.04399	1.03661	1.00826	0	1
VCLIQGTVEALNAVHGFIAEK	P51513	N-Term(Dimethyl); C2(Carbamidomethyl); K21(Dimethyl)	2325.26				0	0
IAAAGLDVTSPEPLPTNHPLLTLK	Q9UBQ7	N-Term(Dimethyl); K24(Dimethyl)	2524.44	0.866879	0.877432	0.903157	0	0
VLGAHILGPGAGEMVNEAALALEYGASCEDIAR	P09622	N-Term(Dimethyl); N16(Deamidated); C28(Carbamidomethyl)	3383.67				0	0
ALLDSLQLGPDSLTVHLIHEVTK	Q14697	N-Term(Dimethyl); K23(Dimethyl)	2555.44	0.889684	1.0095	0.882307	0	0
QIPVLQTNNGPSLTGLTTIAAHLVK	O43324	N-Term(Dimethyl); K25(Dimethyl)	2642.53				0	0
FSFSGNTLVSSSADPEGHFETPIWIER	Q14697;E9PKU7	N-Term(Dimethyl); N6(Deamidated)	3039.45				0	0
VILALGDYMGATCHACIGGTNVR	Q14240	N-Term(Dimethyl); C13(Carbamidomethyl); C16(Carbamidomethyl)	2477.2	0.71872	0.97456	0.738313	0	0
SLSVYHPQLAYCVVQFLEK	Q13362;E9PFR3	N-Term(Dimethyl); C12(Carbamidomethyl); K19(Dimethyl)	2337.23				0	0
DGSTTAGNSSQVSDGAAAILLAR	P09110	N-Term(Dimethyl)	2190.09	0.687887	0.760178	0.905923	0	0
ENSGAAEKPVTIHATPEGTSEACR	Q9Y6M1	N-Term(Dimethyl); K8(Dimethyl); C23(Carbamidomethyl)	2568.23	1.48104	1.18461	1.25164	0	0
RLGSLLPVLSPTSLPSPLPATLETPVPAFLK	P48681	N-Term(Dimethyl); K31(Dimethyl)	3267.93	1.96865	1.5112	1.30417	0	1
VDEFPLCGHMVSDEYEQLSSEALEAAR	X1WI28	N-Term(Dimethyl); C7(Carbamidomethyl)	3110.39	1.42781	1.17647	1.21501	0	0
YGPQYGHPPPPPPPPEYGPHADSPVLMVYGLDQSK	P14866	N-Term(Dimethyl); K35(Dimethyl)	3840.87				0	0
DQAVENILVSPVVVASSLGLVSLGGK	P50454	N-Term(Dimethyl); K26(Dimethyl)	2607.49	1.16766	1.14644	1.01965	0	0
GVAALTSDPAVQAIVLDTASDVLDK	Q9Y490	N-Term(Dimethyl); K25(Dimethyl)	2525.37	0.775133	0.798408	0.971942	0	0
VATTAGLYGSNLMEHTEIDHWLEFSATK	P07814	N-Term(Dimethyl); K28(Dimethyl)	3177.54				0	0
SLSNVIAHEISHSWTGNLVTNK	P09960	N-Term(Dimethyl); K22(Dimethyl)	2463.3			1.37183	0	0
SGGNSYGSGGASYNPGSHGGYGGGSGGGSSYQGK	Q12906	N-Term(Dimethyl); K34(Dimethyl)	3068.29				0	0
AQHVFQHAVPQEGKPITNQK	Q13867	N-Term(Dimethyl); K14(Dimethyl); K20(Dimethyl)	2341.27	0.834659	0.85298	0.979623	0	0
TVEELLETGLIQVATKEEELNAIR	Q86UP2	N-Term(Dimethyl); K16(Dimethyl)	2754.5	1.01357	0.880202	1.15281	0	1
TYQGLESLEEVCVYHSGVPIFHEGMK	Q9UHD1	N-Term(Dimethyl); C12(Carbamidomethyl); K26(Dimethyl)	3065.46	0.983054	0.84515	1.16448	0	0
AKCELSSSVQTDINLPYLTMDSSGPK	P38646	N-Term(Dimethyl); K2(Dimethyl); C3(Carbamidomethyl); K26(Dimethyl)	2925.46	1.11107	1.09494	1.01587	0	1
GDNVYEFHLEFLDLVKPEPVYK	Q9P035	N-Term(Dimethyl); K16(Dimethyl); K22(Dimethyl)	2735.43				0	0
ALTGHLEEVVLALLK	P04083	N-Term(Dimethyl); K15(Dimethyl)	1662.02	0.725098	0.719864	1.0084	0	0
AYHEQLTVAEITNACFEPANQMVK	Q9BQE3	N-Term(Dimethyl); C15(Carbamidomethyl); K24(Dimethyl)	2820.36				0	0
HTGPGILSMANAGPNTNGSQFFICTAK	P62937	N-Term(Dimethyl); N11(Deamidated); N15(Deamidated); C24(Carbamidomethyl); K27(Dimethyl)	2849.35	1.18812	0.961048	1.23767	0	0
VHAELADVLTEAVVDSILAIK	P40227	N-Term(Dimethyl); K21(Dimethyl)	2262.29				0	0
VAYTEADYYHTELWMEQALR	P13674	N-Term(Dimethyl)	2517.17	1.03744	1.30883	0.858379	0	0
GFGDGYNGYGGGPGGGNFGGSPGYGGGR	P22626	N-Term(Dimethyl); N7(Deamidated)	2524.04	0.963214	1.26836	0.760273	0	0
EVSSEDIADMHSNLSNYHQYIVK	Q8TBX8	N-Term(Dimethyl); K23(Dimethyl)	2735.28	1.20965	1.21208	0.99912	0	0
EISGLWNELDSLKDAVEHQR	Q86UP2	N-Term(Dimethyl); K13(Dimethyl)	2395.21	1.11125	1.1529	0.964956	0	1
AVSSAIAQLLGEVAQGNENYAGIAAR	Q9Y490	N-Term(Dimethyl)	2601.36	1.12917	1.00559	1.12416	0	0
FEHSLGVGYLAGCLVHALGEK	Q9Y3Z3	N-Term(Dimethyl); C13(Carbamidomethyl); K21(Dimethyl)	2313.21	0.389777	0.762843	0.511529	0	0
QLFHPEQLITGKEDAANNYAR	P68363;Q71U36;Q9BQE3;Q9NY65	N-Term(Dimethyl); K12(Dimethyl)	2471.25				0	1
GPDGELHANLLCPVDVLDVPEGTLPDK	P22304	N-Term(Dimethyl); C12(Carbamidomethyl); K27(Dimethyl)	2926.48	0.435255	0.526839	0.827093	0	0
GVNAIVYMIDAADREK	Q9NVJ2	N-Term(Dimethyl); K16(Dimethyl)	1820.95	1.16843			0	1
SSVSHSVLSEMQVIEQETPVSAK	G5E9L0	N-Term(Dimethyl); K23(Dimethyl)	2528.28				0	0
FMCEVQVEGYNYTGMGNSTNKK	Q08211	N-Term(Dimethyl); C3(Carbamidomethyl); K21(Dimethyl); K22(Dimethyl)	2641.2	1.0625	0.998196	1.06562	0	1
LVQDYGLESEVAQHLAATYGDK	P43304	N-Term(Dimethyl); K22(Dimethyl)	2463.24	1.33056	1.26991	1.04893	0	0
VVTTPAFMCETALHYIHDGIGAMVR	A0A096LPI6	N-Term(Dimethyl); C9(Carbamidomethyl)	2817.39	1.31993	1.09414	1.20772	0	0
IVSGEAESVEVTPENLQDFVGKPVFTVER	K7EJE8	N-Term(Dimethyl); K22(Dimethyl)	3231.68	0.977786	1.12822	0.867636	0	0
GVSLTNHHFYDESKPFTCLDGSATIPFDQVNDDYCDCK	K7ELL7	N-Term(Dimethyl); K14(Dimethyl); C18(Carbamidomethyl); C35(Carbamidomethyl); C37(Carbamidomethyl); K38(Dimethyl)	4536.99	0.57381	0.670781	0.856399	0	0
IIYLNQLLQEDSLNVADLTSLR	Q9UL46	N-Term(Dimethyl)	2559.39				0	0
AFLTGPHISLADLVAITELMHPVGAGCQVFEGRPK	P30711	N-Term(Dimethyl); C27(Carbamidomethyl); K35(Dimethyl)	3788				0	0
CPSPPMINLISVGGQHQGVFGLPR	P50897	N-Term(Dimethyl); C1(Carbamidomethyl)	2589.34	0.224604	0.235055	0.956616	0	0
TVYGGGCSEMLMAHAVTQLANR	P78371	N-Term(Dimethyl); C7(Carbamidomethyl)	2394.13	1.23671	1.09144	1.13438	0	0
QSAQLTALAAQQQAAGKEEK	Q96A49	N-Term(Dimethyl); K17(Dimethyl); K20(Dimethyl)	2155.17				0	1
LLQTAATAAQQGGQANHPTAAVVTEK	P40763	N-Term(Dimethyl); K26(Dimethyl)	2632.4				0	0
LLASSDPLAQIAEDKPYAELWMGTHPR	P34949	N-Term(Dimethyl); K15(Dimethyl)	3065.57				0	0
LLGTQHGEGNSALSPLNPGELLIALHNIDSVK	Q92797	N-Term(Dimethyl); K32(Dimethyl)	3363.81	0.957007	0.917916	1.04376	0	0
NENTFLDLTVQQIEHLNK	A0A087WYS1	N-Term(Dimethyl); K18(Dimethyl)	2212.15	0.694115	0.760545	0.913682	0	0
YLAEWMVHGYPSENVWELDLKR	Q8NCN5	N-Term(Dimethyl); K21(Dimethyl)	2791.38	0.946653	0.941213	1.00691	0	1
AAAVPVEFQEHHLSEVQNMASEEKLEQVLSSMK	O43837	N-Term(Dimethyl); K24(Dimethyl); K33(Dimethyl)	3779.89	1.32946	1.23533	1.07741	0	1
SVFQGHVTHQALVGTNTTGISEK	Q8TCB0	N-Term(Dimethyl); K23(Dimethyl)	2467.29	0.0986282	0.622662	0.158576	0	0
LVVLDEELEGISPDELKDELPER	P60983	N-Term(Dimethyl); K17(Dimethyl)	2693.41	0.833652	0.824008	1.01284	0	1
QNLSKEELIAELQDCEGLIVR	O43175	N-Term(Dimethyl); K5(Dimethyl); C15(Carbamidomethyl)	2513.33	1.71634	2.5681	0.669081	0	1
MVHNGIEYGDMQLICEAYHLMK	P52209	N-Term(Dimethyl); C15(Carbamidomethyl); K22(Dimethyl)	2708.26	0.705189	0.583434	1.21005	0	0
AQEACGPLEMDSALSVVQNLEK	Q9Y490	N-Term(Dimethyl); C5(Carbamidomethyl); K22(Dimethyl)	2445.19	0.997146	0.930514	1.07282	0	0
ADQELMTYSHDNIICGITSVSFSK	P62873	N-Term(Dimethyl); C15(Carbamidomethyl); K24(Dimethyl)	2772.31	0.97677	0.985713	0.992043	0	0
AKPYEGSILEADCDILIPAASEK	P00367	N-Term(Dimethyl); K2(Dimethyl); C13(Carbamidomethyl); K23(Dimethyl)	2574.33	5.07175			0	0
YTEHSTVGLAQQWDQLDQLGMR	Q13813	N-Term(Dimethyl)	2604.24				0	0
QSGQTDPLQKEELQSGVDAANSAAQQYQR	P46940	N-Term(Dimethyl); K10(Dimethyl)	3203.56	1.00996	1.07912	0.936962	0	1
SGGGGDIHQGFQSLLTEVNK	P35237	N-Term(Dimethyl); K20(Dimethyl)	2100.06	0.902969	0.779123	0.920753	0	0
IYKVPSTETEALASNLMGMFEK	P31150	N-Term(Dimethyl); K3(Dimethyl); K22(Dimethyl)	2543.31	1.09391			0	1
LMDHVGTEPSIKEDQVIQLMNAIFSK	P04844	N-Term(Dimethyl); K12(Dimethyl); K26(Dimethyl)	3027.59	0.336678	0.513717	0.656115	0	1
AIEDEGGNPDEIEITSEGNKK	Q15424	N-Term(Dimethyl); K20(Dimethyl); K21(Dimethyl)	2329.14	0.778007	0.86859	0.896721	0	1
QTNNQNWGSQPIAQQPLQGGDHSGNYGYK	O60506	N-Term(Dimethyl); K29(Dimethyl)	3243.52				0	0
TNISDEESEQATEMLVHNAQNLMQSVK	P18206	N-Term(Dimethyl); K27(Dimethyl)	3102.46				0	0
ESEIIDFFLGASLKDEVLK	P15880	N-Term(Dimethyl); K14(Dimethyl); K19(Dimethyl)	2237.24	1.01233	1.11707	0.981308	0	1
LGGSPTSLGTWGSWIGPDHDKFSAMK	K7ELL7	N-Term(Dimethyl); K21(Dimethyl); K26(Dimethyl)	2816.4	0.851722	0.915771	0.931107	0	1
RNDFQLIGIQDGYLSLLQDSGEVR	I3L397	N-Term(Dimethyl)	2764.42	1.2168	1.07078	1.13766	0	1
YADLTEDQLPSCESLKDTIAR	P18669	N-Term(Dimethyl); C12(Carbamidomethyl); K16(Dimethyl)	2481.21	1.18735	0.872792	0.952821	0	1
QVDVPTLTGAFGILAAHVPTLQVLRPGLVVVHAEDGTTSK	P30049	N-Term(Dimethyl); K40(Dimethyl)	4163.31		1.42524		0	0
SLDLFNCEVTNLNDYRENVFK	H0YN26	N-Term(Dimethyl); C7(Carbamidomethyl); K21(Dimethyl)	2646.28	1.12861	1.07589	1.05019	0	1
ELINNELSHFLEEIKEQEVVDK	P04271	N-Term(Dimethyl); K15(Dimethyl); K22(Dimethyl)	2739.43	0.743241	1.0791	0.689538	0	1
HLSDHLSELVEQTLSDLEQSK	O75643	N-Term(Dimethyl); K21(Dimethyl)	2464.25				0	0
VHVSEEGTEPEAMLQVLGPKPALPAGTEDTAK	A0A0A0MS51;Q5T0I0	N-Term(Dimethyl); K20(Dimethyl); K32(Dimethyl)	3385.74				0	0
RQVQSLTCEVDALKGTNESLER	P08670	N-Term(Dimethyl); C8(Carbamidomethyl); K14(Dimethyl)	2589.32				0	2
NLHQSGFSLSGAQIDDNIPR	Q16555	N-Term(Dimethyl)	2197.09	0.561393	0.80635	0.696999	0	0
MVRPNQDGTLIASCSNDQTVR	P43034	N-Term(Dimethyl); C14(Carbamidomethyl)	2390.15				0	0
AALSSQQQQQLALLLQQFQTLK	Q6Y7W6	N-Term(Dimethyl); K22(Dimethyl)	2541.43				0	0
CIEECVEPWNGSWNDNLVDTSPLKR	Q6PCE3	N-Term(Dimethyl); C1(Carbamidomethyl); C5(Carbamidomethyl); K24(Dimethyl)	3074.42	0.41536	0.716007	0.580759	0	1
CTTDENKVPYFNAPVYLENK	Q9NY12	N-Term(Dimethyl); C1(Carbamidomethyl); K7(Dimethyl); K20(Dimethyl)	2486.22	0.790023	0.903009	0.875864	0	1
TIGGGDDSFNTFFSETGAGK	P68363;Q71U36;Q9BQE3	N-Term(Dimethyl); K20(Dimethyl)	2063.95				0	0
TDNAGDQHGGGGGGGGGAGAAGGGGGGENYDDPHKTPASPVVHIR	P14866	N-Term(Dimethyl); K35(Dimethyl)	4094.86	1.04684	1.16137	0.902396	0	1
IVQTYHVNMAGTNPYTTITPQEINGK	P12814	N-Term(Dimethyl); K26(Dimethyl)	2946.5				0	0
LKTDNAGDQHGGGGGGGGGAGAAGGGGGGENYDDPHKTPASPVVHIR	P14866	N-Term(Dimethyl); K2(Dimethyl); K37(Dimethyl)	4364.08	1.00799	1.00527	1.00383	0	2
VIPAADLSQQISTAGTEASGTGNMK	P11216	N-Term(Dimethyl); K25(Dimethyl)	2503.26	1.11624	1.0956	1.01999	0	0
FQDLGAAYEVLSDSEKR	Q9UBS4	N-Term(Dimethyl); K16(Dimethyl)	1983.99	0.826803	0.962749	0.859761	0	1
VATPVDWKDGDSVMVLPTIPEEEAK	P30041	N-Term(Dimethyl); K8(Dimethyl); K25(Dimethyl)	2810.45	0.952848	0.84051	1.13493	0	1
LESLSAATTFEPLEPVKDTDIQGFLK	Q8N1F7	N-Term(Dimethyl); K17(Dimethyl); K26(Dimethyl)	2933.57				0	1
TECALLGLLLDLKR	P20020	N-Term(Dimethyl); C3(Carbamidomethyl); K13(Dimethyl)	1670.98	1.03913	1.0756	0.967186	0	1
NECDPALALLSDYVLHNSNTMR	Q13200	N-Term(Dimethyl); C3(Carbamidomethyl)	2561.2				0	0
GGGGPGGGGPGGGSAGGPSQPPGGGGPGIR	A0A087WTP3	N-Term(Dimethyl)	2298.09		1.0829		0	0
TQYEAMASSNMHEAEEWYR	P14136	N-Term(Dimethyl)	2360.98	1.43483	1.18309	1.0948	0	0
EGDALELTCEAIGKPQPVMVTWVR	A0A087X0T8	N-Term(Dimethyl); C9(Carbamidomethyl); K14(Dimethyl)	2755.41	0.669896	0.852883	0.786334	0	0
TGQEYKPGNPPAEIGQNISSNSSASILESK	P07814	N-Term(Dimethyl); K6(Dimethyl); K30(Dimethyl)	3187.61				0	0
VTYLVHNFEEGGGVAMGMYNQDK	O75874	N-Term(Dimethyl); K23(Dimethyl)	2615.22	0.408494	0.437268	0.935249	0	0
CPEALFQPSFLGMESCGIHETTFNSIMK	P60709	N-Term(Dimethyl); C1(Carbamidomethyl); C16(Carbamidomethyl); N24(Deamidated); K28(Dimethyl)	3288.51	1.34784	1.17518	1.14822	0	0
MLEMGITGPEGHVLSRPEELEAEAVFR	Q14195	N-Term(Dimethyl)	3025.5	1.79344	0.971751	1.28971	0	0
QITSYGETCPGLEQYAIKK	P50990	N-Term(Dimethyl); C9(Carbamidomethyl); K18(Dimethyl); K19(Dimethyl)	2270.17	0.849565	0.890474	0.955135	0	1
IVFDSIDNLEAAPHDIGYVK	Q9UJ70	N-Term(Dimethyl); K20(Dimethyl)	2272.18	0.606832	0.683153	0.889282	0	0
EMSWIADTYASTIGHYDINAHACVTGKPISQGGIHGR	P00367	N-Term(Dimethyl); C23(Carbamidomethyl); K27(Dimethyl)	4069.96				0	0
DGNVLLHEMQIQHPTASLIAK	P40227	N-Term(Dimethyl); K21(Dimethyl)	2371.28				0	0
NMGGPYGGGNYGPGGSGGSGGYGGR	P22626	N-Term(Dimethyl)	2217.93			0.980858	0	0
EKPYFPIPEEYTFIQNVPLEDR	Q00839	N-Term(Dimethyl); K2(Dimethyl)	2780.4	1.19533	1.19447	1.00185	0	0
NIILEEGKEILVGDVGQTVDDPYATFVK	G3V1A4	N-Term(Dimethyl); K8(Dimethyl); K28(Dimethyl)	3146.68	1.07062	0.96739	1.10795	0	1
MVTMVEIDQMVIDGCKK	P52788	N-Term(Dimethyl); C15(Carbamidomethyl); K16(Dimethyl); K17(Dimethyl)	2081.05	1.11414	0.843054	1.32305	0	1
ASTNIQDTEGNTPLHLACDEERVEEAK	B1AJY7	N-Term(Dimethyl); C18(Carbamidomethyl); K27(Dimethyl)	3083.45	0.899725	1.18817	0.679021	0	1
IIVENLFYPVTLDVLHQIFSK	A6NLN1	N-Term(Dimethyl); K21(Dimethyl)	2544.44	0.800858	0.75936	1.05584	0	0
AAQYQVNQAAAAQAAATAAAMTQSAVK	C9JP00	N-Term(Dimethyl); K27(Dimethyl)	2662.36				0	0
VHVSEEGTEPEAMLQVLGPKPALPAGTEDTAKEDAANR	A0A0A0MS51;Q5T0I0	N-Term(Dimethyl); K20(Dimethyl); K32(Dimethyl)	4042.04				0	1
VIISAPSADAPMFVMGVNHEK	P04406	N-Term(Dimethyl); K21(Dimethyl)	2269.17	1.01049	0.873164	1.07023	0	0
GVAGAHGLLCLLSDHVDKR	Q9UBQ7	N-Term(Dimethyl); C10(Carbamidomethyl); K18(Dimethyl)	2074.12	0.775717	0.805222	0.964443	0	1
NDEELNKLLGGVTIAQGGVLPNIQAVLLPK	Q8IUE6	N-Term(Dimethyl); K7(Dimethyl); K30(Dimethyl)	3197.85				0	1
LAADEDDDDDDEEDDDEDDDDDDFDDEEAEEKAPVKK	P06748	N-Term(Dimethyl); K32(Dimethyl); K36(Dimethyl); K37(Dimethyl)	4358.65				0	2
ETVVEVPQVTWEDIGGLEDVKR	P55072	N-Term(Dimethyl); K21(Dimethyl)	2554.32	0.890062	0.937853	0.950112	0	1
ALKDPNAFLFDHLLTLKPVK	Q7L2H7	N-Term(Dimethyl); K3(Dimethyl); K17(Dimethyl); K20(Dimethyl)	2392.43				0	1
LNEDMACSVAGITSDANVLTNELR	P25789	N-Term(Dimethyl); C7(Carbamidomethyl)	2621.25	1.11767	1.03717	1.07883	0	0
GQWGTVCDNLWDLTDASVVCR	Q08380	N-Term(Dimethyl); C7(Carbamidomethyl); C20(Carbamidomethyl)	2480.13				0	0
TDDEVVQREEEAIQLDGLNASQIR	P14625	N-Term(Dimethyl)	2756.37	0.832826	1.00201	0.832092	0	1
LTTPTYGDLNHLVSATMSGVTTCLR	Q9BVA1;Q13885;P07437;P68371;P04350	N-Term(Dimethyl); C23(Carbamidomethyl)	2736.37				0	0
TLTGTVIDSGDGVTHVIPVAEGYVIGSCIK	P61158	N-Term(Dimethyl); C28(Carbamidomethyl); K30(Dimethyl)	3114.64				0	0
VIQGDGVDINTLQEIVEGMK	P43490	N-Term(Dimethyl); K20(Dimethyl)	2214.16	0.517511	0.536843	0.965076	0	0
VQEQVHTLLSQDQAQAAR	Q07065	N-Term(Dimethyl)	2050.06	1.01866	1.10751	0.920814	0	0
YIYVADILAHEIHVLEK	J3QT77	N-Term(Dimethyl); K17(Dimethyl)	2082.16	0.863847	0.901837	0.958953	0	0
VIHDNFGIVEGLMTTVHAITATQK	P04406	N-Term(Dimethyl); N5(Deamidated); K24(Dimethyl)	2652.4	0.949223	1.08558	0.875376	0	0
RGVMLAVDAVIAELKK	P10809	N-Term(Dimethyl); K15(Dimethyl); K16(Dimethyl)	1797.1	1.5027	1.21846	1.23467	0	2
NELMYQLEQDHDLQAILQER	Q08211	N-Term(Dimethyl)	2514.23	1.06165	1.17969	0.90095	0	0
FVSAIEGMHPNQEDHETFVDINPLTGIILK	Q14108	N-Term(Dimethyl); K30(Dimethyl)	3420.75	0.69479	0.960408	0.724248	0	0
SLQELFLAHILSPWGAEVK	P09874	N-Term(Dimethyl); K19(Dimethyl)	2194.21	1.0239	1.08552	0.944299	0	0
SGAHSFISGLPQGYDTEVDEAGSQLSGGQR	Q03518	N-Term(Dimethyl)	3078.44	0.334866	0.673774	0.631031	0	0
TTLPQDCSNPAPLSSPLNGVHDR	P16278	N-Term(Dimethyl); C7(Carbamidomethyl)	2504.22				0	0
SINPLGGFVHYGEVTNDFVMLK	P39023	N-Term(Dimethyl); K22(Dimethyl)	2493.28	0.849355	0.989564	0.859279	0	0
LKVEGYSGTAGDSMAYHNGR	P24821;J3QSU6	N-Term(Dimethyl); K2(Dimethyl)	2169.03				0	1
AHDGGIYAISWSPDSTHLLSASGDK	O75083	N-Term(Dimethyl); K25(Dimethyl)	2641.28	1.05912	0.928837	1.14155	0	0
YTNLSYIGEGAYGMVCSAYDNVNK	P28482	N-Term(Dimethyl); C16(Carbamidomethyl); K24(Dimethyl)	2745.24				0	0
SSGPPPPSGSSGSEAAAGAGAAAPASQHPATGTGAVQTEAMK	Q14444	N-Term(Dimethyl); K42(Dimethyl)	3759.79	1.57406	1.99509	0.894531	0	0
NATNVEQAFMTMAAEIK	Q9H0U4	N-Term(Dimethyl); K17(Dimethyl)	1924.94	1.12836	0.972661	1.16139	0	0
CSENKLPAELQELPGLSHQYWSAPSDKEGYSGVGLLSR	P27695	N-Term(Dimethyl); C1(Carbamidomethyl); K5(Dimethyl); K27(Dimethyl)	4287.14	0.782438	0.732898	1.0688	0	2
VLLIESLATMEPDSRPELQEK	Q5VYK3	N-Term(Dimethyl); K21(Dimethyl)	2454.31	1.18376	1.18963	0.996185	0	0
AAAAAAAAAAAAAAAGAGAGAK	P55011	N-Term(Dimethyl); K22(Dimethyl)	1652.9	1.08562	0.982141	1.10661	0	0
FVIHCNSPVWGADKCEELLEK	O75367	N-Term(Dimethyl); C5(Carbamidomethyl); K14(Dimethyl); C15(Carbamidomethyl); K21(Dimethyl)	2615.29				0	1
LVPLLLEDGGEAPAALEAALEEK	Q14204	N-Term(Dimethyl); K23(Dimethyl)	2404.31	1.09218	1.01803	1.07405	0	0
AIEEGVNHMWTVSAFQQHPR	Q8TDQ7;P46926	N-Term(Dimethyl)	2365.14				0	0
MVLAAAGGVEHQQLLDLAQK	P31930	N-Term(Dimethyl); K20(Dimethyl)	2148.18	2.21925	1.29905	1.71029	0	0
LDINLLDNVVNCLYHGEGAQQR	O14980	N-Term(Dimethyl); C12(Carbamidomethyl)	2569.27				0	0
TALLDAAGVASLLTTAEVVVTEIPKEEK	P10809	N-Term(Dimethyl); K25(Dimethyl); K28(Dimethyl)	2952.67				0	1
TAFDEAIAELDTLNEDSYK	P27348	N-Term(Dimethyl); K19(Dimethyl)	2201.04	1.16464	1.03286	1.12885	0	0
SINPLGGFVHYGEVTNDFVMLK	P39023	N-Term(Dimethyl); N16(Deamidated); K22(Dimethyl)	2494.25				0	0
ENIESLAHALVEIIK	Q92878	N-Term(Dimethyl); K15(Dimethyl)	1734.99	0.995731	0.959184	1.03927	0	0
SISHYHETLGEALQGVELEFSGLDIK	Q9HD45	N-Term(Dimethyl); K26(Dimethyl)	2928.5	0.809899	0.975583	0.831104	0	0
EGNASGVSLLEALDTILPPTRPTDKPLR	Q05639	N-Term(Dimethyl); K25(Dimethyl)	3016.65	0.698453	0.938458	0.745095	0	0
SGAFGHLFRPDNFIFGQSGAGNNWAK	Q13509	N-Term(Dimethyl); K26(Dimethyl)	2851.4	0.532567	0.782252	0.681579	0	0
ERLEQQVPVNQVFGQDEMIDVIGVTK	P39023	N-Term(Dimethyl); K26(Dimethyl)	3027.58				0	1
HLEDHQAHCEFALMDCPQCQRPFQK	Q9Y4K3	N-Term(Dimethyl); C9(Carbamidomethyl); C16(Carbamidomethyl); C19(Carbamidomethyl); K25(Dimethyl)	3238.45	0.928272	1.09737	0.846856	0	0
TIQGELGWISYPSHGWEEISGVDEHYTPIR	P29320	N-Term(Dimethyl)	3484.67				0	0
AQTLPTSVVTITSESSPGKR	Q01082	N-Term(Dimethyl); K19(Dimethyl)	2115.16				0	1
CFEKNEAIQAAHDAVAQEGQCR	P09936	N-Term(Dimethyl); C1(Carbamidomethyl); K4(Dimethyl); C21(Carbamidomethyl)	2588.19	0.546414	0.612287	0.89342	0	1
FRDPSSVGVAQHLTNTVFIDR	A0A087WY03	N-Term(Dimethyl)	2387.24			0.963149	0	1
SSLSSAQADFNQLAELDR	Q13813	N-Term(Dimethyl)	1979.96	0.778588	0.893787	0.872092	0	0
CDVTQSQPLGAVPLPPADCVLSTLCLDAACPDLPTYCR	P40261	N-Term(Dimethyl); C1(Carbamidomethyl); C19(Carbamidomethyl); C25(Carbamidomethyl); C30(Carbamidomethyl); C37(Carbamidomethyl)	4259	1.30821	0.834342	1.56972	0	0
VVMITGDNPLTACHVAQELHFIEK	Q9HD20	N-Term(Dimethyl); C13(Carbamidomethyl); K24(Dimethyl)	2778.42	0.815239	0.893109	0.913838	0	0
TDVNKIEEFLEEVLCPPK	Q9Y696	N-Term(Dimethyl); K5(Dimethyl); C15(Carbamidomethyl); K18(Dimethyl)	2244.17				0	1
GLDWVKEEAPDILCLQETK	P27695	N-Term(Dimethyl); K6(Dimethyl); C14(Carbamidomethyl); K19(Dimethyl)	2328.21				0	1
EVIITPNSAWGGEGSLGCGIGYGYLHR	Q9H8Y8	N-Term(Dimethyl); C18(Carbamidomethyl)	2891.41				0	0
LRPLFEACGEVVQIRPIFSNR	Q15020	N-Term(Dimethyl); C8(Carbamidomethyl)	2529.37				0	0
SVNSLDGLASVLYPGCDTLDKVFTYAK	O95573	N-Term(Dimethyl); C16(Carbamidomethyl); K21(Dimethyl); K27(Dimethyl)	3017.55	1.25049	1.00724	1.2429	0	1
STVAALLQNLYQPTGGQLLLDGKPLPQYEHR	Q03518	N-Term(Dimethyl); K23(Dimethyl)	3476.88	0.290629	0.789293	0.36863	0	0
EAQAQHNNSEFTEEQKK	Q96BJ3	N-Term(Dimethyl); K16(Dimethyl); K17(Dimethyl)	2102.01				0	1
YGINTTDIFQTVDLWEGK	P37802	N-Term(Dimethyl); K18(Dimethyl)	2156.08	2.15024	1.83699	1.17184	0	0
YQLLQLVEPFGVISNHLILNK	P43243	N-Term(Dimethyl); K21(Dimethyl)	2494.43	0.728233	0.902079	0.808193	0	0
MLLADQGQSWKEEVVTVETWQEGSLK	P09211	N-Term(Dimethyl); K11(Dimethyl); K26(Dimethyl)	3075.56				0	1
LLDFGSLSNLQVTQPTVGMNFK	P0CW22	N-Term(Dimethyl); K22(Dimethyl)	2465.3				0	0
NSADGLNMFDGTDSCYFHSGPR	Q04446	N-Term(Dimethyl); C15(Carbamidomethyl)	2476.02				0	0
QVEVTVHKGDECQLVGPAQPSHWK	Q15149	N-Term(Dimethyl); K8(Dimethyl); C12(Carbamidomethyl); K24(Dimethyl)	2813.43	0.920827	0.948316	1.03276	0	1
CIWGPSYWCQNTETAAQCNAVEHCK	P07602	N-Term(Dimethyl); C1(Carbamidomethyl); C9(Carbamidomethyl); C18(Carbamidomethyl); C24(Carbamidomethyl); K25(Dimethyl)	3126.34	0.858451	0.744617	1.15417	0	0
LLGFGSALLDNVDPNPENFVGAGIIQTK	O95782	N-Term(Dimethyl); K28(Dimethyl)	2955.58	1.5343			0	0
YAQDFGLVEEACFPYTGTDSPCK	P53634	N-Term(Dimethyl); C12(Carbamidomethyl); C22(Carbamidomethyl); K23(Dimethyl)	2711.19	0.457491	0.670031	0.68356	0	0
NMDPLNDNIATLLHQSSDKFVSELWK	P35579	N-Term(Dimethyl); K19(Dimethyl); K26(Dimethyl)	3099.57				0	1
DKAPGQLECETAIAALNSCLR	Q9Y490	N-Term(Dimethyl); K2(Dimethyl); C9(Carbamidomethyl); C19(Carbamidomethyl)	2373.18	0.570271	0.589742	0.968923	0	1
NTVEIFKFEEAENSLLHLK	J3QT77	N-Term(Dimethyl); K7(Dimethyl); K19(Dimethyl)	2345.27	0.844672	1.08763	0.777492	0	1
VEQIAAIAQELNELDYYDSHNVNTR	O43707	N-Term(Dimethyl)	2933.42				0	0
VLLVGADNFTLLGKPLLGK	H3BUY0	N-Term(Dimethyl); K14(Dimethyl); K19(Dimethyl)	2052.28	1.70739	1.14697	1.49029	0	0
LKPAFIKPYGTVTAANSSFLTDGASAMLIMAEEK	P55084	N-Term(Dimethyl); K2(Dimethyl); K7(Dimethyl); K34(Dimethyl)	3684.94	2.10262	1.64669	1.27832	0	0
SAGQGEVLVYVEDPAGHQEEAK	P21333	N-Term(Dimethyl); K22(Dimethyl)	2369.15				0	0
IVSWSQVGVEPSIMGIGPIPAIK	Q9BWD1	N-Term(Dimethyl); K23(Dimethyl)	2434.37				0	0
NITLSLVANPSHLEAADPVVMGK	Q02218	N-Term(Dimethyl); K23(Dimethyl)	2432.3	1.5874	1.38319	1.14893	0	0
EAGICYASIAMATDYDCWKEHEEAVSVDR	Q13126	N-Term(Dimethyl); C5(Carbamidomethyl); C17(Carbamidomethyl); K19(Dimethyl)	3432.51	0.496513	0.711128	0.698991	0	1
IFLLGLADNEAAIVQAESEETKER	Q9UHB9	N-Term(Dimethyl); K22(Dimethyl)	2702.42	0.819897	0.920525	0.891687	0	1
SHMMDVQGSTQDSAIKDFVLK	P13667	N-Term(Dimethyl); K16(Dimethyl); K21(Dimethyl)	2421.21				0	1
MIINEELMASLDQPTQTVVMHR	Q99613	N-Term(Dimethyl)	2584.29				0	0
TSWAGAPVHLGQGQFLK	P48681	N-Term(Dimethyl); K17(Dimethyl)	1853				0	0
KGGSYTQAASSDSAQGSDVSLTACKV	P30455	N-Term(Dimethyl); C24(Carbamidomethyl); K25(Dimethyl)	2631.26				0	2
LNEQYEHASIHLWDLLEGK	Q14444	N-Term(Dimethyl); K19(Dimethyl)	2351.2	2.42543	2.08478	1.16471	0	0
VDKGVVPLAGTNGETTTQGLDGLSER	P04075	N-Term(Dimethyl); K3(Dimethyl); Q18(Deamidated)	2671.37	0.573323	0.698916	0.821227	0	1
VDKGVVPLAGTDGETTTQGLDGLSER		N-Term(Dimethyl); K3(Dimethyl)	2671.37				0	1
GNFGGSFAGSFGGAGGHAPGVAR	P52272	N-Term(Dimethyl)	2062.98	1.14721	1.15211	0.996863	0	0
NEAIQAAHDAVAQEGQCR	P09936	N-Term(Dimethyl); C17(Carbamidomethyl)	1995.93	0.922897	0.88758	0.762253	0	0
LATPTYGDLNHLVSATMSGVTTSLR	Q13509	N-Term(Dimethyl)	2633.36	1.029	1.08544	0.949076	0	0
QGSGSSQPMEVQEGYGFGSGDDPYSSAEPHVSGVK	Q13263	N-Term(Dimethyl); K35(Dimethyl)	3613.58		1.02071		0	0
IKPHLMSQELPEDWDKQPVK	P07237	N-Term(Dimethyl); K2(Dimethyl); K16(Dimethyl); K20(Dimethyl)	2530.37	0.428759	0.853783	0.68585	0	1
CSDAAGYPHATHDLEGPPLDAYSIQGQHTISPLDLAK	Q15365	N-Term(Dimethyl); C1(Carbamidomethyl); K37(Dimethyl)	4001.92			0.283047	0	0
HFVDSHHQKPVNAIIEHVR	Q7KZF4	N-Term(Dimethyl); K9(Dimethyl)	2319.24	0.978232	0.935356	1.02007	0	0
TGDFQLHTNVNDGTEFGGSIYQK	A0A0A0MR02	N-Term(Dimethyl); N11(Deamidated); K23(Dimethyl)	2585.23				0	0
TLHTTASNWLHLIPQTLSHLK	Q14204	N-Term(Dimethyl); K21(Dimethyl)	2467.38	0.969077	0.901372	1.07632	0	0
YGIICMEDLIHEIYTVGK	P18124	N-Term(Dimethyl); C5(Carbamidomethyl); K18(Dimethyl)	2210.11				0	0
FWEVISDEHGIDPTGTYHGDSDLQLDR	P07437	N-Term(Dimethyl)	3130.43				0	0
SGSGVNPYCGLIEEAYGLDKIEFLQSHENQEIYQK	O60684	N-Term(Dimethyl); C9(Carbamidomethyl); K20(Dimethyl); K35(Dimethyl)	4099.99	0.772587	0.945326	0.818191	0	1
EGICALGGTSELSSEGTQHSYSEEEK	P13797	N-Term(Dimethyl); C4(Carbamidomethyl); K26(Dimethyl)	2841.27	0.903546	0.698495	1.29502	0	0
SIQEIQELDKDDESLRK	P52565	N-Term(Dimethyl); K10(Dimethyl); K17(Dimethyl)	2130.12	0.363486	0.781667	1.41946	0	2
NQVAMNPTNTVFDAKR	P11142	N-Term(Dimethyl); K15(Dimethyl)	1861.95	1.05138	0.986972	1.06646	0	1
SVYAHFPINVVIQENGSLVEIR	P32969	N-Term(Dimethyl)	2512.35	1.25018	1.228	1.01921	0	0
SLDGIPFTVDAGGLIHCIEDFHKK	Q93052	N-Term(Dimethyl); C17(Carbamidomethyl); K23(Dimethyl); K24(Dimethyl)	2753.43	1.11767	1.03264	1.08357	0	1
AGTFQAFEQFGQQLLAHGHYASPEIK	Q13813	N-Term(Dimethyl); K26(Dimethyl)	2931.47	1.34458	1.18897	1.13216	0	0
LVFVHSAEGNEFWSALLEK	P07384	N-Term(Dimethyl); K19(Dimethyl)	2232.16	0.828946	0.615399	1.34852	0	0
MSASQLEALCPQVINAALALAAKPQSK	P35221	N-Term(Dimethyl); C10(Carbamidomethyl); Q12(Deamidated); K23(Dimethyl); K27(Dimethyl)	2895.58	0.895587	1.07595	0.833303	0	0
YLPPATQVVLISATLPHEILEMTNK	P38919	N-Term(Dimethyl); K25(Dimethyl)	2834.56				0	0
ISHMVIEEVNFMQNHLEIEK	A0MZ66	N-Term(Dimethyl); K20(Dimethyl)	2496.26	0.785058	0.996399	0.788782	0	0
FDGALNVDLTEFQTNLVPYPR	P68363;Q71U36;Q9BQE3;Q9NY65	N-Term(Dimethyl)	2437.23				0	0
AKDINQEVYNFLATAGAK	Q99798	N-Term(Dimethyl); K2(Dimethyl); K18(Dimethyl)	2037.09	1.52748	1.17416	1.30238	0	1
GCHESCLDEEVEGQGFCSGPGWDPVTGWGTPNFPALLK	O14773	N-Term(Dimethyl); C2(Carbamidomethyl); C6(Carbamidomethyl); C17(Carbamidomethyl); K38(Dimethyl)	4246.88	0.462276	0.665223	0.695702	0	0
TLVLSNLSYSATEETLQEVFEK	P19338	N-Term(Dimethyl); K22(Dimethyl)	2557.32	1.44931	1.11978	1.29573	0	0
IAALQAFADQLIAAGHYAK	Q13813	N-Term(Dimethyl); K19(Dimethyl)	2028.12				0	0
SLPFMLCDTMGLDGAEGAGLCMDDIPHILK	Q53G44	N-Term(Dimethyl); C7(Carbamidomethyl); C21(Carbamidomethyl); K30(Dimethyl)	3333.56				0	0
ALVDHENVISCPHLGASTK	O43175	N-Term(Dimethyl); C11(Carbamidomethyl); K19(Dimethyl)	2104.08	1.64088	1.27179	1.29166	0	0
YVLENHPGTNSNYQMHLLKK	Q5SSJ5	N-Term(Dimethyl); K19(Dimethyl); K20(Dimethyl)	2470.29	0.745317	0.821846	0.907903	0	1
HFIEQGINVCLCQSYAK	P00505	N-Term(Dimethyl); C10(Carbamidomethyl); C12(Carbamidomethyl); K17(Dimethyl)	2123.04	1.55986	1.3122	1.19007	0	0
QFEGLADKLSFGLEDEPLETATK	E5RHW4	N-Term(Dimethyl); K8(Dimethyl); K23(Dimethyl)	2622.35	1.13366	0.752408	1.50841	0	1
ITVVGVGQVGMACAISILGK	P07195	N-Term(Dimethyl); C13(Carbamidomethyl); K20(Dimethyl)	2029.15	0.809823	0.899932	0.866751	0	0
CPSIAAAIAAVNALHGR	Q14498	N-Term(Dimethyl); C1(Carbamidomethyl)	1719.93				0	0
AWRDPDEPVLLEEPVVLALAEK	P14550	N-Term(Dimethyl); K22(Dimethyl)	2545.38	0.673307	0.801885	0.840602	0	1
ASLNPSDTPPSVVNEDFLHDLK	O00116	N-Term(Dimethyl); K22(Dimethyl)	2451.23				0	0
GCSKPLCCSCALLDSSHSELK	P29590	N-Term(Dimethyl); C2(Carbamidomethyl); K4(Dimethyl); C7(Carbamidomethyl); C8(Carbamidomethyl); C10(Carbamidomethyl); K21(Dimethyl)	2493.15	0.522387	0.908464	0.57567	0	0
YMNSGPVVAMVWEGLNVVK	Q32Q12	N-Term(Dimethyl); K19(Dimethyl)	2149.11	1.06381	1.02491	1.03913	0	0
RVIISAPSADAPMFVMGVNHEKYDNSLK	P04406	N-Term(Dimethyl); K22(Dimethyl); K28(Dimethyl)	3173.65				0	2
MVGGIAQIIAAQEEMLRK	Q9Y490	N-Term(Dimethyl); K18(Dimethyl)	2014.11				0	1
GVVGPGPAAIAALGGGGAGPPVVGGGGGR	P22059	N-Term(Dimethyl)	2310.25	0.960979	0.804199	1.1963	0	0
NVASVCLQIGYPTVASVPHSIINGYKR	P05388	N-Term(Dimethyl); C6(Carbamidomethyl); N23(Deamidated); K26(Dimethyl)	3000.6	1.2477	1.05292	1.18633	0	1
ILDLGITGPEGHVLSRPEEVEAEAVNR	Q16555	N-Term(Dimethyl)	2928.54	0.875768	0.888339	0.986959	0	0
GFGTDEQAIVDVVANR	P20073	N-Term(Dimethyl)	1718.87	1.07359	1.0119	1.06216	0	0
VVMALGDYMGASCHACIGGTNVR	P60842	N-Term(Dimethyl); C13(Carbamidomethyl); C16(Carbamidomethyl)	2467.13	1.53482	1.24367	1.23549	0	0
VQQMIGQIDGLISQLEMDQQAGK	O95202	N-Term(Dimethyl); K23(Dimethyl)	2586.32	1.08457	0.954331	1.13775	0	0
QAQILASEAEKAEQINQAAGEASAVLAK	Q9UJZ1	N-Term(Dimethyl); K11(Dimethyl); K28(Dimethyl)	2923.57				0	1
MREIVHLQAGQCGNQIGAK	P68371;P04350;Q9BVA1;Q13885;P07437;Q13509	N-Term(Dimethyl); C12(Carbamidomethyl); K19(Dimethyl)	2166.12				0	1
QQWFDLFSDVHAVCLWDDKGPAK	Q93034	N-Term(Dimethyl); C14(Carbamidomethyl); K19(Dimethyl); K23(Dimethyl)	2846.38	0.970592	1.0167	0.955729	0	1
VVETDPSPYCIVAPDTVIHCEGEPIKR	P55072	N-Term(Dimethyl); C10(Carbamidomethyl); C20(Carbamidomethyl); K26(Dimethyl)	3137.56	0.83117	0.85777	0.970081	0	1
MTDIMTEGITIVEDINKR	P61764	N-Term(Dimethyl); K17(Dimethyl)	2135.1	1.08421	0.944918	1.14871	0	1
AIENIDTLTNLESLFLGK	Q15435	N-Term(Dimethyl); K18(Dimethyl)	2047.13				0	0
ELQELVQYPVEHPDKFLK	P55072	N-Term(Dimethyl); K15(Dimethyl); K18(Dimethyl)	2296.25			1.22344	0	1
RWLPAGDALLQMITIHLPSPVTAQK	P13639	N-Term(Dimethyl); K25(Dimethyl)	2812.59				0	1
VHSPSGALEECYVTEIDQDKYAVR	P21333	N-Term(Dimethyl); C11(Carbamidomethyl); K20(Dimethyl)	2822.36				0	1
VGAVDADKHHSLGGQYGVQGFPTIK	Q15084	N-Term(Dimethyl); K8(Dimethyl); K25(Dimethyl)	2665.4			0.90722	0	1
VLNNMEIGTSLFDEEGAK	P00558	N-Term(Dimethyl); K18(Dimethyl)	2023	0.43054	0.6519	0.739659	0	0
FIQENIFGICPHMTEDNKDLIQGK	P30101	N-Term(Dimethyl); C10(Carbamidomethyl); K18(Dimethyl); K24(Dimethyl)	2931.47	0.397716	0.553306	0.719608	0	1
HTIAVVWGGVNIPHSPYR	O75369	N-Term(Dimethyl)	2031.08	0.80666	0.837636	0.964105	0	0
AYHEQLSVAEITNACFEPANQMVK	P68363;Q71U36	N-Term(Dimethyl); N13(Deamidated); C15(Carbamidomethyl); K24(Dimethyl)	2807.34				0	0
VGKDELFALEQSCAQVVLQAANER	Q16658	N-Term(Dimethyl); K3(Dimethyl); C13(Carbamidomethyl)	2731.4	0.801536			0	1
TVVSGSCAAHSLLITTEGK	Q9P258	N-Term(Dimethyl); C7(Carbamidomethyl); K19(Dimethyl)	1987.05	0.884174	0.876628	1.00974	0	0
YDAMALGNHEFDNGVEGLIEPLLK	P21589	N-Term(Dimethyl); K24(Dimethyl)	2701.35	0.220663	0.518243	0.42627	0	0
AQDPSEVLTMLTNETGFEISSSDATVK	B4DY09	N-Term(Dimethyl); K27(Dimethyl)	2926.42	0.932645	0.993959	0.93937	0	0
IKWGDAGAEYVVESTGVFTTMEK	P04406	N-Term(Dimethyl); K2(Dimethyl); K23(Dimethyl)	2602.3		0.941562		0	1
GNFTLPEVAECFDEITYVELQKEEAQK	Q00839	N-Term(Dimethyl); C11(Carbamidomethyl); K22(Dimethyl); K27(Dimethyl)	3271.6	1.18253	1.10495	1.07142	0	1
FLPGYVGGIQEGAVTPAGVVNK	Q9UBM7	N-Term(Dimethyl); K22(Dimethyl)	2229.22				0	0
SDALETLGFLNHYQMK	P14866	N-Term(Dimethyl); K16(Dimethyl)	1922.96				0	0
LYPWGVVEVENPEHNDFLK	Q15019	N-Term(Dimethyl); K19(Dimethyl)	2341.18	1.00066	0.947955	1.05678	0	0
GAVLPHFNVLFDGLSK	Q08AM6	N-Term(Dimethyl); K16(Dimethyl)	1769.99	0.943973	1.05438	1.06563	0	0
LGGTIDDCELVEGLVLTQK	P50991	N-Term(Dimethyl); C8(Carbamidomethyl); K19(Dimethyl)	2116.12	1.04893	1.03934	1.01037	0	0
ILADLEDYLNELWEDKEGK	Q99613	N-Term(Dimethyl); K16(Dimethyl); K19(Dimethyl)	2377.21	1.22116	1.02414	1.19373	0	1
ELFSPLHALNFGIGGDTTR	P68402	N-Term(Dimethyl)	2073.07	0.932995	0.927746	1.00728	0	0
GFGFVTFDDHDPVDKIVLQK	P22626	N-Term(Dimethyl); K15(Dimethyl); K20(Dimethyl)	2361.24	0.867166	0.905405	0.958845	0	1
ERDVYEELLTQAEIQGNINK	P46940	N-Term(Dimethyl); K20(Dimethyl)	2418.24				0	1
DTNGENIAESLVAEGLATR	Q7KZF4	N-Term(Dimethyl)	1987.99	1.06645	1.03145	1.0351	0	0
VIISAPSADAPMFVMGVNHEK	P04406	N-Term(Dimethyl); N18(Deamidated); K21(Dimethyl)	2270.15	0.686404	0.862694	0.796548	0	0
GTIVLASPGWTTHSISDGKDLEK	Q14914	N-Term(Dimethyl); K19(Dimethyl); K23(Dimethyl)	2496.32	0.764214	0.780173	0.980648	0	1
VTTLPGHIQAVYVQNVVK	O14617	N-Term(Dimethyl); K18(Dimethyl)	2022.17	0.764719	0.84149	0.909791	0	0
LGQSDPAPLQHQMDIYQK	P29401	N-Term(Dimethyl); K18(Dimethyl)	2125.07				0	0
ELASQPDVDGFLVGGASLKPEFVDIINAK	P60174	N-Term(Dimethyl); K19(Dimethyl); K29(Dimethyl)	3113.66	0.239362	0.393289	0.698312	0	0
GPAWVGSHGVLQHTQGLPADR	Q15654	N-Term(Dimethyl)	2211.14	1.26374			0	0
NAIDDGCVVPGAGAVEVAMAEALIK	P40227	N-Term(Dimethyl); C7(Carbamidomethyl); K25(Dimethyl)	2526.29	1.16626	1.08411	1.07698	0	0
TVWDWELMNDIKPIWQRPSK	P14625	N-Term(Dimethyl); K12(Dimethyl); K20(Dimethyl)	2626.38	0.718006	0.985398	0.729466	0	0
LATMMVQGQEYEAGGSVIHPLNLHMK	Q9UHG3	N-Term(Dimethyl); K26(Dimethyl)	2910.46	0.946728	0.960642	0.986626	0	0
FAAEEFKVPAATSAIITNDGIGINPAQTAGNVFLK	P61960	N-Term(Dimethyl); K7(Dimethyl); K35(Dimethyl)	3659.97	0.784782	1.02279	0.768158	0	1
ELQKPDSFHSLTPTFAAVLVHIDNLR	O95479	N-Term(Dimethyl); K4(Dimethyl)	3004.62	0.564802	0.695424	0.813084	0	0
FVNLGIEPPKGVLLFGPPGTGK	P35998	N-Term(Dimethyl); K10(Dimethyl); K22(Dimethyl)	2321.36	1.12777	1.06216	1.06297	0	1
FKKEDEIPETVSLEMLDAAK	F8W7Q4	N-Term(Dimethyl); K2(Dimethyl); K3(Dimethyl); K20(Dimethyl)	2405.28	0.572771	0.799367	0.748172	0	2
EVLPEHVSVLQGVDLSPDITR	Q7L775	N-Term(Dimethyl)	2331.25			0.711109	0	0
SVVLMSHLGRPDGVPMPDKYSLEPVAVELK	P00558	N-Term(Dimethyl); K19(Dimethyl); K30(Dimethyl)	3347.81				0	1
ESKEEETSIDVAGKPNEVTK	P53985	N-Term(Dimethyl); K3(Dimethyl); K14(Dimethyl); K20(Dimethyl)	2302.2	0.899136	0.983919	0.838737	0	1
SLCEQVSHHPPAAAHHAESK	P22059	N-Term(Dimethyl); C3(Carbamidomethyl); K20(Dimethyl)	2249.08	0.999132	0.810771	1.20961	0	0
GHYTEGAELVDSVLDVVRK	Q9BVA1;Q13885;P07437;P68371;Q13509	N-Term(Dimethyl); K19(Dimethyl)	2143.13				0	1
TFFPEYTHQLFGDDETAFGYK	O14929	N-Term(Dimethyl); K21(Dimethyl)	2569.19				0	0
ALDLFSDNAPPPELLEIINEDIAK	Q15084	N-Term(Dimethyl); K24(Dimethyl)	2693.42	0.783354	0.983533	0.797366	0	0
AFVHWYVGEGMEEGEFSEAREDMAALEK	P68363;Q71U36;Q9BQE3	N-Term(Dimethyl); K28(Dimethyl)	3273.47				0	1
AGQMVTVWAAGAGVAHSPPSTLVWK	J9JID7	N-Term(Dimethyl); K25(Dimethyl)	2577.36	0.314922	0.467197	0.674826	0	0
SDIYVCMISYAHNVAAQGK	P31150	N-Term(Dimethyl); C6(Carbamidomethyl); K19(Dimethyl)	2183.05				0	0
TGIIVTTSEAVLLQLVADKDHPK	Q96CN7	N-Term(Dimethyl); K19(Dimethyl); K23(Dimethyl)	2532.46	0.552933	0.735378	0.75275	0	1
ILNNSGLPITSAIDLEDAAK	Q96I99	N-Term(Dimethyl); K20(Dimethyl)	2111.16	1.80336	1.09783	1.64451	0	0
SAAASNLSGLSLQEAQQILNVSK	A0A0A6YYL4	N-Term(Dimethyl); K23(Dimethyl)	2385.29	1.19379	1.1757	1.01653	0	0
AIGGIILTASHNPGGPNGDFGIK	P36871	N-Term(Dimethyl); K23(Dimethyl)	2262.22	1.23524	1.23761	0.99921	0	0
IDNSQVESGSLEDDWDFLPPKK	P27797	N-Term(Dimethyl); K21(Dimethyl); K22(Dimethyl)	2603.28	0.761435	0.945494	0.820328	0	1
TATANGFQMVTSGVQSK	Q969V3	N-Term(Dimethyl); K17(Dimethyl)	1782.9	0.664489	0.858379	0.774993	0	0
TNCNVAVINVGAPAAGMNAAVR	Q01813	N-Term(Dimethyl); C3(Carbamidomethyl)	2198.11	0.708908	0.79968	0.887488	0	0
RPAEDMEEEQAFKR	P61978;Q5T6W2	N-Term(Dimethyl); K13(Dimethyl)	1791.87				0	1
TFYGLHQDFPSVVLVGLGK	P28838	N-Term(Dimethyl); K19(Dimethyl)	2133.17	0.562599	0.893526	0.630348	0	0
QVEHPLLSGLLYPGLQALDEEYLK	P54577	N-Term(Dimethyl); K24(Dimethyl)	2781.5	0.815712	1.19259	0.684752	0	0
SQGLSQLYHNQSQGLLSQLQGQSK	D3DQV9	N-Term(Dimethyl); K24(Dimethyl)	2685.39	0.903305	1.20711	0.749163	0	0
SKSEEAHAEDSVMDHHFR	Q8NC51	N-Term(Dimethyl); K2(Dimethyl)	2167.98	1.16156	1.11021	1.12072	0	1
VGSHITGGDIYGIVSENSLIK	P38606	N-Term(Dimethyl); K21(Dimethyl)	2215.19	0.941111	0.961928	0.979461	0	0
ADSPSIDYAELLQHFEK	Q08AM6	N-Term(Dimethyl); K17(Dimethyl)	2019	0.827059	0.951599	0.870105	0	0
NIEVMNSFELLSHTVEEK	E7EM64	N-Term(Dimethyl); K18(Dimethyl)	2175.09			1.27574	0	0
TVLSANADHMAQIEGLMDDVDFK	A0A087X054	N-Term(Dimethyl); K23(Dimethyl)	2576.23	0.789547	0.873643	0.904759	0	0
QFQDAGHFDAENIKK	Q13813	N-Term(Dimethyl); K14(Dimethyl); K15(Dimethyl)	1831.93				0	1
STVLSLDWHPNNVLLAAGSCDFK	Q92747;O15143	N-Term(Dimethyl); C20(Carbamidomethyl); K23(Dimethyl)	2600.3				0	0
ALEEPAVDMLHTVTDMVR	P20591	N-Term(Dimethyl)	2055.02				0	0
GGGGSFGYSYGGGSGGGFSASSLGGGFGGGSR	P35527	N-Term(Dimethyl)	2733.19	0.779011			0	0
QLAPGMVQQMQSVCSDCNGEGEVINEKDR	O60884	N-Term(Dimethyl); C14(Carbamidomethyl); C17(Carbamidomethyl); K27(Dimethyl)	3335.5	1.11315	1.00986	1.10352	0	1
TQFPSLDIEVDGGVGPDTVHK	C9J9T0	N-Term(Dimethyl); K21(Dimethyl)	2267.15	0.817453	0.866867	0.94406	0	0
HIADLAGNSEVILPVPAFNVINGGSHAGNK	P06733	N-Term(Dimethyl); N8(Deamidated); N19(Deamidated); K30(Dimethyl)	3069.6	0.630756	1.51186	0.417675	0	0
LASEAKPAAVAAENEEIGSHIK	Q9Y490	N-Term(Dimethyl); K6(Dimethyl); K22(Dimethyl)	2319.25	0.98127	0.961018	1.02222	0	0
ATCAPQHGAPGPGPADASK	P21333	N-Term(Dimethyl); C3(Carbamidomethyl); K19(Dimethyl)	1845.88	1.55294	1.11698	1.34344	0	0
GFAFVTFDDHDTVDKIVVQK	P51991	N-Term(Dimethyl); K15(Dimethyl); K20(Dimethyl)	2365.24	0.674773	0.656913	1.02834	0	1
TVTLQGNLDPCALYASEEEIGQLVK	P06132	N-Term(Dimethyl); C11(Carbamidomethyl); K25(Dimethyl)	2804.43	0.893641	0.73202	1.14076	0	0
RGFEVVYMTEPIDEYCVQQLK	P08238	N-Term(Dimethyl); C16(Carbamidomethyl); K21(Dimethyl)	2660.3	0.905011	1.00428	0.76913	0	1
AIKNDSVVAGGGAIEMELSK	Q99832	N-Term(Dimethyl); K3(Dimethyl); K20(Dimethyl)	2073.11	1.029	0.892626	1.15407	0	1
ENTEGEYSGIEHVIVDGVVQSIK	P50213	N-Term(Dimethyl); K23(Dimethyl)	2558.29				0	0
IPNIYAIGDVVAGPMLAHK	P09622	N-Term(Dimethyl); K19(Dimethyl)	2035.14	1.14915	0.964182	1.19319	0	0
LSENNIQTIFAVTEEFQPVYK	P05556	N-Term(Dimethyl); K21(Dimethyl)	2526.3	1.16189	0.929305	1.25169	0	0
HYAHTDCPGHADYVK	P49411	N-Term(Dimethyl); C7(Carbamidomethyl); K15(Dimethyl)	1826.82	1.29666	1.09037	1.19053	0	0
TLSDLKLDYLDLYLIHWPTGFKPGK	P15121	N-Term(Dimethyl); K6(Dimethyl); K22(Dimethyl); K25(Dimethyl)	3045.7				0	1
VIISAPSADAPMFVMGVNHEK	P04406	N-Term(Dimethyl); M15(Oxidation); K21(Dimethyl)	2285.16			0.834458	0	0
QVYEEEYGSSLEDDVVGDTSGYYQR	P08758	N-Term(Dimethyl)	2916.27	1.04767	0.97077	1.08043	0	0
AGAAPYVQAFDSLLAGPVAEYLK	Q01518	N-Term(Dimethyl); K23(Dimethyl)	2407.29	1.10122	0.966414	1.14077	0	0
SKAELMEISEDKTK	P05455	N-Term(Dimethyl); K2(Dimethyl); K12(Dimethyl); K14(Dimethyl)	1720.94	0.962191	1.03361	0.980058	0	2
AGQVVTIWAAGAGATHSPPTDLVWK	P02545	N-Term(Dimethyl); K25(Dimethyl)	2589.38	1.12748	1.16008	0.972993	0	0
QTIDNSQGAYQEAFDISKK	P27348	N-Term(Dimethyl); K18(Dimethyl); K19(Dimethyl)	2227.12	0.886666	0.904461	0.98143	0	1
GQVEQANQELQELIQSVK	P55268	N-Term(Dimethyl); K18(Dimethyl)	2097.12	0.556252	0.568244	0.98	0	0
GLPQLGTLGAGNHYAEIQVVDEIFNEYAAK	Q9Y3I0	N-Term(Dimethyl); K30(Dimethyl)	3273.68				0	0
HSQAVEELAEQLEQTKR	P35579	N-Term(Dimethyl); K16(Dimethyl)	2052.06				0	1
VYCGPSPSCLVQSSSLSNAHIDYTTKPAIIFR	P51610	N-Term(Dimethyl); C3(Carbamidomethyl); C9(Carbamidomethyl); K26(Dimethyl)	3624.79				0	0
AYHEQLTVAEITNACFEPANQMVK	Q9BQE3	N-Term(Dimethyl); N13(Deamidated); C15(Carbamidomethyl); K24(Dimethyl)	2821.35				0	0
YIAIVSTTVETKEPEKEIRPALELLEPIEQK	P50395	N-Term(Dimethyl); K12(Dimethyl); K16(Dimethyl); K31(Dimethyl)	3679.07	1.28243	1.03343	1.24234	0	2
LLQDSVDFSLADAINTEFK	P08670	N-Term(Dimethyl); K19(Dimethyl)	2182.12	1.31677	1.12467	1.16699	0	0
HKDVAEEIANYRPTLDTLHEQASALPQEHAESPDVR	Q01082	N-Term(Dimethyl); K2(Dimethyl)	4123.02	0.693926	0.823843	0.843253	0	1
SQDAEVGDGTTSVTLLAAEFLK	Q99832	N-Term(Dimethyl); K22(Dimethyl)	2308.19	0.995141	1.03347	0.964001	0	0
VFVLDEADVMIATQGHQDQSIR	Q9NUU7	N-Term(Dimethyl)	2500.24	1.09257	0.939624	1.16409	0	0
VAHALAEGLGVIACIGEK	P60174;U3KPZ0	N-Term(Dimethyl); C14(Carbamidomethyl); K18(Dimethyl)	1864.03				0	0
MTDSFTEQADQVTAEVGK	P09417	N-Term(Dimethyl); K18(Dimethyl)	2012.94	0.847451	0.907535	0.934847	0	0
LFPNSLDQTDMHGDSEYNIMFGPDICGPGTK	P27797	N-Term(Dimethyl); C26(Carbamidomethyl); K31(Dimethyl)	3512.57	0.729264	0.964885	0.756656	0	0
EVIVGPDTTSYSLADLSPSTHYTAK	P24821;J3QSU6	N-Term(Dimethyl); K25(Dimethyl)	2708.35				0	0
DTNGENIAESLVAEGLATR	Q7KZF4	N-Term(Dimethyl); N3(Deamidated)	1988.97				0	0
SVNESLNNLFITEEDYQALR	Q00610;K7EJJ5	N-Term(Dimethyl)	2383.17				0	0
SAGQENLETLKSPETQAPLWTPEEINQGAMNPLEK	P48681	N-Term(Dimethyl); K11(Dimethyl); K35(Dimethyl)	3934.96	1.84184	1.48707	1.23996	0	1
EDYTGKDVLILGGGDGGILCEIVK	P52788	N-Term(Dimethyl); K6(Dimethyl); C20(Carbamidomethyl); K24(Dimethyl)	2605.37				0	1
GQDHCGIESEVVAGIPR	P07858	N-Term(Dimethyl); C5(Carbamidomethyl)	1851.9	0.526187	0.905656	0.815855	0	0
LLQDHPWLLSQNLVVKPDQLIK	P53396	N-Term(Dimethyl); K16(Dimethyl); K22(Dimethyl)	2681.56	0.963057	1.01238	0.952354	0	0
ALEEGLTPQEICDKYHIIHADIYR	P56192	N-Term(Dimethyl); C12(Carbamidomethyl); K14(Dimethyl)	2940.49	0.938871	1.02061	0.920945	0	1
VIFHPEFLSSTSPLLPVDYEEFVR	P13807	N-Term(Dimethyl)	2849.47	0.871067	1.01419	0.859849	0	0
GPAVGIDLGTTYSCVGVFQHGK	P11142	N-Term(Dimethyl); C14(Carbamidomethyl); K22(Dimethyl)	2319.17	0.748157	0.713789	1.04933	0	0
GVEITGFPEAQALGLEVFHAGTALK	P22102	N-Term(Dimethyl); K25(Dimethyl)	2611.41	1.19164	1.25683	0.949202	0	0
AENGKLVINGNPITIFQER	P04406	N-Term(Dimethyl); N3(Deamidated); K5(Dimethyl); N9(Deamidated)	2171.17	1.11146			0	1
ALECFCQAASEVGKEEFLDR	Q12769	N-Term(Dimethyl); C4(Carbamidomethyl); C6(Carbamidomethyl); K14(Dimethyl)	2415.12			1.10495	0	1
TAFDDAIAELDTLNEDSYK	P61981	N-Term(Dimethyl); K19(Dimethyl)	2187.03	0.824133	0.919483	0.89731	0	0
AGSNMLLIGVHGPTTPCEEVSMK	O75369	N-Term(Dimethyl); C17(Carbamidomethyl); K23(Dimethyl)	2484.22	0.783787	0.947185	0.828423	0	0
QLFHPEQLITGKEDAANNYAR	P68363;Q71U36;Q9BQE3;Q9NY65	N-Term(Dimethyl); K12(Dimethyl); N17(Deamidated)	2472.25				0	1
TGQATVASGIPAGWMGLDCGPESSKK	P00558	N-Term(Dimethyl); M15(Oxidation); C19(Carbamidomethyl); K25(Dimethyl); K26(Dimethyl)	2705.32	0.441546	0.623072	0.709457	0	1
IYKVPSTEAEALASSLMGLFEK	P50395	N-Term(Dimethyl); K3(Dimethyl); K22(Dimethyl)	2468.32				0	1
LNEAAAGLNQAATELVQASR	Q9Y490	N-Term(Dimethyl)	2055.08				0	0
ASGAVGLSYGAHSNLCINQLVR	P26440	N-Term(Dimethyl); C16(Carbamidomethyl)	2315.19	1.1374	1.05876	1.07548	0	0
AVDDLNLHSYSNLPIWVNK	Q14204	N-Term(Dimethyl); K19(Dimethyl)	2254.18				0	0
LGHVVMGNNAVSPYQQVIEK	P60228	N-Term(Dimethyl); K20(Dimethyl)	2239.18	1.12558	1.14763	0.98189	0	0
LVHSLFESIMSTQESSNPNNVLK	O15067	N-Term(Dimethyl); K23(Dimethyl)	2630.34	1.04706	0.941669	1.11318	0	0
TTTNVLGDSLGAGIVEHLSR	A0A087WT87	N-Term(Dimethyl)	2068.1				0	0
GRPAPGFHHGDGPGNAVQEIMIPASK	Q96AE4;C9JSZ1	N-Term(Dimethyl); K26(Dimethyl)	2696.36				0	0
LASVPAGGAVAVSAAPGSAAPAAGSAPAAAEEKKDEK	P05387	N-Term(Dimethyl); K33(Dimethyl); K34(Dimethyl); K37(Dimethyl)	3386.8	1.14279	1.236	0.925631	0	2
EVELNELEPEKQPMNAASGAAMSLAGAEK	F5GZS6	N-Term(Dimethyl); K11(Dimethyl); K29(Dimethyl)	3098.53	1.20914	1.07312	1.12803	0	1
AKDIVPGDIVEIAVGDKVPADIR	P16615	N-Term(Dimethyl); K2(Dimethyl); K17(Dimethyl)	2474.41	0.942664	0.982793	0.960249	0	2
YLALESMCTLASSEFSHEAVK	O94973;O95782	N-Term(Dimethyl); C8(Carbamidomethyl); K21(Dimethyl)	2429.17				0	0
IPIHNEDITYDELVLMMQR	Q92734	N-Term(Dimethyl)	2358.17	0.835744	0.928983	0.900646	0	0
LGGSPTSLGTWGSWIGPDHDK	K7ELL7	N-Term(Dimethyl); K21(Dimethyl)	2224.09				0	0
TITDVINIGIGGSDLGPLMVTEALKPYSSGGPR	P06744	N-Term(Dimethyl); K25(Dimethyl)	3384.79	0.478641	0.530842	0.90268	0	0
NWIEEVTGMSIGPNFQLGLK	Q15417	N-Term(Dimethyl); K20(Dimethyl)	2289.19				0	0
SLLVIPNTLAVNAAQDSTDLVAK	P17987	N-Term(Dimethyl); K23(Dimethyl)	2409.35	1.17295	1.14541	1.0252	0	0
HGLQPALLVHWAECLQK	P49792	N-Term(Dimethyl); C14(Carbamidomethyl); K17(Dimethyl)	2056.11	1.61295	0.951816	1.69652	0	0
GAQVNAVNQNGCTPLHYAASK	B1AJY7	N-Term(Dimethyl); N10(Deamidated); C12(Carbamidomethyl); K21(Dimethyl)	2257.09				0	0
EGILNDDIYCPPETAVLLASYAVQSK	P26038	N-Term(Dimethyl); C10(Carbamidomethyl); K26(Dimethyl)	2922.47	0.845823	0.956286	0.885484	0	0
AAVEALQSQALHATSQQPLRK	A0A087X142	N-Term(Dimethyl); K21(Dimethyl)	2303.28				0	1
DKLESEMEDAYHEHQANLLR	P23246	N-Term(Dimethyl); K2(Dimethyl)	2484.18	0.580428	0.737391	0.788024	0	1
AENGKLVINGNPITIFQER	P04406	N-Term(Dimethyl); N3(Deamidated); K5(Dimethyl)	2170.18	0.715716	0.823958	0.889523	0	1
TISAVGEQLLPTVEHLQLELDQLK	E9PHI4	N-Term(Dimethyl); K24(Dimethyl)	2730.52	1.78018	1.73998	1.02425	0	0
FNFLAPELPAVSEFSTSETMGHSADR	P55084	N-Term(Dimethyl)	2868.34				0	0
IIAEGANGPTTPEADKIFLER	P00367	N-Term(Dimethyl); K16(Dimethyl)	2298.22	1.25821	1.10929	1.13553	0	1
TVLGTPEVLLGALPGAGGTQR	P40939	N-Term(Dimethyl)	2035.15				0	0
SIMGLEGEDEGAISMLSDNTAK	Q8WVM8	N-Term(Dimethyl); K22(Dimethyl)	2324.08				0	0
VGEVCHITCKPEYAYGSAGSPPK	Q02790	N-Term(Dimethyl); C5(Carbamidomethyl); C9(Carbamidomethyl); K10(Dimethyl); K23(Dimethyl)	2591.25				0	0
GTDLWLGVDALGLNIYEKDDKLTPK	E7EQR4	N-Term(Dimethyl); K18(Dimethyl); K21(Dimethyl); K25(Dimethyl)	2886.59				0	2
QIANSQDGYVWQVTDMNR	P10155	N-Term(Dimethyl)	2153	0.977291	0.961261	1.01782	0	0
AFVHWYVGEGMEEGEFSEAR	P68363;Q71U36;Q9BQE3;Q9NY65	N-Term(Dimethyl)	2358.04				0	0
EIVHLQAGQCGNQIGAK	P68371;P04350;Q9BVA1;Q13885;P07437;Q13509	N-Term(Dimethyl); C10(Carbamidomethyl); K17(Dimethyl)	1878.98				0	0
AIGSASEGAQSSLQEVYHK	P28066	N-Term(Dimethyl); K19(Dimethyl)	2018.01	0.975208	1.05555	0.924928	0	0
LLAELPASVHALTGVDLSK	Q14254	N-Term(Dimethyl); K19(Dimethyl)	1990.15	0.909228	1.24181	0.973969	0	0
GLTMLDHEQVTPEDPGAQFLIR	Q9UBE0	N-Term(Dimethyl)	2495.25	1.00341	0.932699	1.07702	0	0
AASADSTTEGTPADGFTVLSTK	O75367	N-Term(Dimethyl); K22(Dimethyl)	2183.06	0.290771	0.515256	0.707296	0	0
HWMLDKLTGVFAPRPSTGPHK	P62701	N-Term(Dimethyl); K6(Dimethyl); K21(Dimethyl)	2459.33			1.26864	0	1
TSRPENAIIYNNNEDFQVGQAK	P29401	N-Term(Dimethyl); K22(Dimethyl)	2564.26				0	0
NPYYGGESSSITPLEELYKR	P31150	N-Term(Dimethyl); K19(Dimethyl)	2359.18	0.877826	0.932808	0.942118	0	1
GFGDGYNGYGGGPGGGNFGGSPGYGGGR	P22626	N-Term(Dimethyl)	2523.07				0	0
NHQEEDLTEFLCANHVLK	Q9BT09	N-Term(Dimethyl); C12(Carbamidomethyl); K18(Dimethyl)	2253.1	0.861192	0.808368	1.06655	0	0
SLGYAYVNFQQPADAER	P11940;B1ANR0	N-Term(Dimethyl)	1956.94				0	0
LMNESLMLVTALNPHIGYDK	P07954	N-Term(Dimethyl); K20(Dimethyl)	2315.2	1.53175	1.22694	1.24984	0	0
GSLLGCSIDITSAADSEAITFQK	P17655	N-Term(Dimethyl); C6(Carbamidomethyl); K23(Dimethyl)	2440.22	0.823273	0.790193	1.04304	0	0
MVADHLQFLHAECHNIIR	Q13617	N-Term(Dimethyl); C13(Carbamidomethyl)	2232.11	0.915819	1.11823	0.81991	0	0
TLTAVHDAILEDLVFPSEIVGKR	P62081	N-Term(Dimethyl); K22(Dimethyl)	2579.44	1.02977	1.18405	0.870678	0	1
TGVHHYSGNNIELGTACGK	P62888	N-Term(Dimethyl); N9(Deamidated); C17(Carbamidomethyl); K19(Dimethyl)	2071.98	1.78648	1.46424	1.14062	0	0
ARPFPDGLAEDIDKGEVSAR	P13639	N-Term(Dimethyl); K14(Dimethyl)	2199.14	1.44851	1.1722	1.23712	0	1
RFPHGIPFLADYVHSLGLK	P17050	N-Term(Dimethyl); K19(Dimethyl)	2223.23				0	1
ENALVQMADGNQAQLAMSHLNGHK	A6NLN1	N-Term(Dimethyl); K24(Dimethyl)	2633.29	0.947593	0.998455	0.950129	0	0
GATYGKPVHHGVNQLK	P61313	N-Term(Dimethyl); K6(Dimethyl); K16(Dimethyl)	1790	1.02197	1.02068	1.0024	0	0
AIEALKEFNEDGALAVLQQFK	O60506	N-Term(Dimethyl); K6(Dimethyl); K21(Dimethyl)	2418.32				0	1
LSAASTWLEDEGVGATTVMLK	A0A087X054	N-Term(Dimethyl); K21(Dimethyl)	2235.15	0.915355	1.09767	0.834845	0	0
TVATPLNQVANPNSAIFGGARPR	Q15056	N-Term(Dimethyl)	2379.28				0	0
DNTIEHLLPLFLAQLKDECPEVR	P30153	N-Term(Dimethyl); K16(Dimethyl); C19(Carbamidomethyl)	2806.46	1.11534	1.02625	1.08804	0	1
LGNDFMGITLASSQAVSNAR	Q9HC38	N-Term(Dimethyl)	2080.05	0.819613	0.919055	0.892804	0	0
AGLPCQDLEFVQFHPTGIYGAGCLITEGCR	P31040	N-Term(Dimethyl); C5(Carbamidomethyl); Q12(Deamidated); C23(Carbamidomethyl); C29(Carbamidomethyl)	3395.6				0	0
GPVKPTGGPGGGGTQTQQQMNQLK	P26196	N-Term(Dimethyl); K4(Dimethyl); Q15(Deamidated); K24(Dimethyl)	2451.28				0	0
MVHNGIEYGDMQLICEAYHLMK	P52209	N-Term(Dimethyl); N4(Deamidated); C15(Carbamidomethyl); K22(Dimethyl)	2709.24				0	0
QLVFHIGHGDLGSPAVLVSR	O95479	N-Term(Dimethyl)	2130.17	0.420707	0.622212	0.676909	0	0
APEAWDYGQGFVNEEMIR	P00387	N-Term(Dimethyl)	2139.98	0.899879	0.9927	0.907518	0	0
TIVAINKDPEAPIFQVADYGIVADLFK	P13804	N-Term(Dimethyl); K7(Dimethyl); K27(Dimethyl)	3031.67				0	1
YTPSGQAGAAASESLFVSNHAY	P04075	N-Term(Dimethyl)	2256.05	0.735621	0.810859	0.908233	0	0
GKDHVVSDFSEHGSLK	P54886	N-Term(Dimethyl); K2(Dimethyl); K16(Dimethyl)	1825.94	1.37446	1.3101	1.05031	0	1
YTALDKWTNQLNSLNQAVVSK	P61201	N-Term(Dimethyl); K6(Dimethyl); K21(Dimethyl)	2477.33	0.881549	0.810317	1.08913	0	1
AVMEQSGAWVQLSQKPDGINLQER	P51513	N-Term(Dimethyl); K15(Dimethyl)	2740.41	0.435062	0.552469	0.788374	0	0
FAHTNVESLVNEYDDNGEGIILFRPSHLTNKFEDK	P30101	N-Term(Dimethyl); K31(Dimethyl); K35(Dimethyl)	4133.04	0.570938	0.810886	0.704885	0	1
VANILHDDCAFLSAFGDVSKPER	Q9BS26	N-Term(Dimethyl); C9(Carbamidomethyl); K20(Dimethyl)	2617.3	1.37244	1.02317	1.34287	0	0
ILCEELGAPANSAVNCVPLEDFGGHHPDPNLTYAADLVETMK	P36871	N-Term(Dimethyl); C3(Carbamidomethyl); C16(Carbamidomethyl); K42(Dimethyl)	4621.19	0.628846	0.799846	0.787094	0	0
ISKPAPYWEGTAVIDGEFK	Q13162	N-Term(Dimethyl); K3(Dimethyl); K19(Dimethyl)	2192.16	0.606888	0.635472	0.970441	0	0
LVKPGNQNTQVTEAWNK	Q9UQ80	N-Term(Dimethyl); K3(Dimethyl); K17(Dimethyl)	2011.09	1.12562	1.0396	1.08397	0	0
MAAISESNINLCGSHCGVSIGEDGPSQMALEDLAMFR	P29401	N-Term(Dimethyl); C12(Carbamidomethyl); C16(Carbamidomethyl)	3995.8	1.89632	1.05916	1.79241	0	0
VGAIPANALDDGQWSQGLISAAR	Q9Y490	N-Term(Dimethyl)	2338.21	1.11528	1.07915	1.03464	0	0
GTDECAIESIAVAATPIPK	P53634	N-Term(Dimethyl); C5(Carbamidomethyl); K19(Dimethyl)	1999.04	0.511301	0.69329	0.684171	0	0
DHSPDLYSLELAGLDEIGKR	H0Y750	N-Term(Dimethyl); K19(Dimethyl)	2284.17				0	1
AITSGGITYQDQPWHADCFVCVTCSK	Q5JXI8	N-Term(Dimethyl); C18(Carbamidomethyl); C21(Carbamidomethyl); C24(Carbamidomethyl); K26(Dimethyl)	3057.39	0.47243	0.600638	0.787433	0	0
NNLSFIETSALDSTNVEEAFK	Q15907	N-Term(Dimethyl); K21(Dimethyl)	2385.18				0	0
AIVDALPPPCESACTVPTDVDKWFHHQK	Q15181	N-Term(Dimethyl); C10(Carbamidomethyl); C14(Carbamidomethyl); K22(Dimethyl); K28(Dimethyl)	3302.62	0.873316	0.978882	0.893161	0	1
LTPRPTAAELEEVLQVNSLIQTQK	Q9BSJ8	N-Term(Dimethyl); K24(Dimethyl)	2734.54	0.841957	0.879904	0.957952	0	0
GHEGPVWQVAWAHPMYGNILASCSYDR	P55735	N-Term(Dimethyl); C23(Carbamidomethyl)	3129.43	1.03577	0.946974	1.095	0	0
GKFPVQLENVDSFVELGQVALR	Q92542	N-Term(Dimethyl); K2(Dimethyl)	2501.38				0	1
LLEVPVMLTEQYPQGLGPTVPELGTEGLRPLAK	K7ENV7	N-Term(Dimethyl); K33(Dimethyl)	3601.99	1.13256	1.13265	1.00105	0	0
GDFLFSSDHLIEMATK	E9PDF6	N-Term(Dimethyl); K16(Dimethyl)	1866.92				0	0
QFIDSNPNQPLVILEMESGASAK	P49588	N-Term(Dimethyl); K23(Dimethyl)	2544.29	1.48766	1.18119	1.26087	0	0
LGLALNYSVFYYEIQNAPEQACHLAK	P61981	N-Term(Dimethyl); C22(Carbamidomethyl); K26(Dimethyl)	3068.54	0.731461	0.627736	1.16655	0	0
IAVSKPSGPQPQADLQALLQSGAQVR	Q8IV08	N-Term(Dimethyl); K5(Dimethyl)	2715.52	0.733509	3.39991	0.215987	0	0
GSLESPATDVFGSTEEGEKR	O00232	N-Term(Dimethyl); K19(Dimethyl)	2152.04	0.504792	0.551808	0.915826	0	1
LADDVDLEQVANETHGHVGADLAALCSEAALQAIR	P55072	N-Term(Dimethyl); Q9(Deamidated); N12(Deamidated); C26(Carbamidomethyl)	3702.82				0	0
YVAQAGLEPLASGDPSASASHAAGITGSR	O94966	N-Term(Dimethyl)	2769.38	1.23427	1.3253	0.932359	0	0
GVMGGQSAGPQHTEAETIQK	O60763	N-Term(Dimethyl); K20(Dimethyl)	2082.02				0	0
SHTSEGAHLDITPNSGAAGNSAGPK	Q92597	N-Term(Dimethyl); K25(Dimethyl)	2432.17	0.22983	0.480299	0.479053	0	0
ELPLGPADAMELADHLVK	Q8N201	N-Term(Dimethyl); K18(Dimethyl)	1975.05	0.827113	1.44451	0.573238	0	0
ALVQTEDHLLLFLQQLAGK	Q8N766	N-Term(Dimethyl); K19(Dimethyl)	2193.26	1.37065	1.24413	1.10294	0	0
FVDHVFDEQVIDSLTVK	P04843	N-Term(Dimethyl); K17(Dimethyl)	2047.06	0.878672	0.968765	0.908024	0	0
MLAGNEFQVSLSSSMSVSELK	A0A096LNZ9	N-Term(Dimethyl); K21(Dimethyl)	2300.15	1.03318	0.422993	0.967932	0	0
ALQHMAAMSSAQIVSATAIHNK	E9PKB7	N-Term(Dimethyl); K22(Dimethyl)	2336.22	0.633521	0.745315	0.850962	0	0
LYQPEYQEVSTEEQREEISGK	A0A087X054	N-Term(Dimethyl); K21(Dimethyl)	2598.25			1.7182	0	1
TLDLSNNQLSEIPAELADCPK	Q8N1G4	N-Term(Dimethyl); C19(Carbamidomethyl); K21(Dimethyl)	2384.21	0.621916	0.731732	0.850881	0	0
LGAASLGAEDPETQVVLINAVK	Q9Y490	N-Term(Dimethyl); K22(Dimethyl)	2251.25				0	0
GNVVFGEPITASLGIDGTHYWSK	Q14195	N-Term(Dimethyl); K23(Dimethyl)	2504.27	0.85634	0.793618	1.08025	0	0
NLKPIKPMQFLGDEETVR	P18669	N-Term(Dimethyl); K3(Dimethyl); K6(Dimethyl)	2199.21	0.600746	0.759741	0.791616	0	0
QGLYELSASNFELHVAQGDHFIK	Q86UY0	N-Term(Dimethyl); K23(Dimethyl)	2659.34	0.672625	0.750031	0.897807	0	0
VTEQLIEAINNGDFEAYTK	D6R938;E9PBG7	N-Term(Dimethyl); K19(Dimethyl)	2211.11				0	0
VIESTQDLGNDLAGVMALQR	Q01082	N-Term(Dimethyl)	2158.11	1.12787	1.03796	1.08784	0	0
QFFMEDIVLANHPDIFNPDNPK	F8W7U8	N-Term(Dimethyl); K22(Dimethyl)	2657.29	0.760335	0.6073	1.2534	0	0
TYFSCTSAHTSTGDGTAMITR	P31040	N-Term(Dimethyl); C5(Carbamidomethyl)	2293.01	1.42443	1.1966	1.19174	0	0
RAGLGSGLSLSGLVHPELSR	P49748	N-Term(Dimethyl)	2034.14	0.956011	1.09229	0.876224	0	1
NVASVCLQIGYPTVASVPHSIINGYK	P05388	N-Term(Dimethyl); C6(Carbamidomethyl); N23(Deamidated); K26(Dimethyl)	2844.48	1.26943	1.00395	1.26586	0	0
IIENAENEYQTAISENYQTMSDTTFK	P52907	N-Term(Dimethyl); K26(Dimethyl)	3096.42	1.10655	1.15579	0.95848	0	0
FITHAPPGEFNEVFNDVR	P52907	N-Term(Dimethyl)	2117.04	0.44789	0.58034	0.772641	0	0
LGVNNISGIEEVNMFTNQGTVIHFNNPK	P20290	N-Term(Dimethyl); K28(Dimethyl)	3142.61				0	0
NNIAYGLQSCEDDKVMAAAQAAHADDFIQEMEHGIYTDVGEK	Q03519	N-Term(Dimethyl); C10(Carbamidomethyl); K14(Dimethyl); K42(Dimethyl)	4739.14	0.167186	0.577486	0.289832	0	1
ATVAPEDVSEVIFGHVLAAGCGQNPVR	Q9BWD1	N-Term(Dimethyl); C21(Carbamidomethyl)	2821.42				0	0
TDEFQLHTNVNDGTEFGGSIYQK	P21796	N-Term(Dimethyl); K23(Dimethyl)	2656.25	1.60806	1.42278	1.1315	0	0
LPVVIGGLLDVDCSEDVIK	Q00610	N-Term(Dimethyl); C13(Carbamidomethyl); K19(Dimethyl)	2097.14				0	0
HELQANCYEEVKDR	G3V1A4	N-Term(Dimethyl); C7(Carbamidomethyl); K12(Dimethyl)	1846.86	0.812501	0.829288	0.980862	0	1
GLKYELISETGGSHDKR	Q12906	N-Term(Dimethyl); K3(Dimethyl); K16(Dimethyl)	1974.06	0.792979	0.916825	0.865893	0	2
GGGGPGGGGPGGGSAGGPSQPPGGGGPGIRK	A0A087WTP3	N-Term(Dimethyl); K31(Dimethyl)	2454.21	0.916495	1.14191	0.8035	0	1
ESVELPLTHPEYYEEMGIKPPK	P62191	N-Term(Dimethyl); K19(Dimethyl); K22(Dimethyl)	2670.36				0	0
HLCCLQALSAVSTHPSIVK	Q96T76	N-Term(Dimethyl); C3(Carbamidomethyl); C4(Carbamidomethyl); K19(Dimethyl)	2177.15				0	0
EQQIVIQSSGGLSKDDIENMVK	P38646	N-Term(Dimethyl); K14(Dimethyl); K22(Dimethyl)	2502.3	1.16583	1.06214	1.09887	0	1
VLHPLEGAVVIIFKK	Q13740	N-Term(Dimethyl); K14(Dimethyl); K15(Dimethyl)	1747.12	0.977435	0.99335	0.985086	0	1
ELPQLVASVIESESEILHHEK	Q5T4S7	N-Term(Dimethyl); K21(Dimethyl)	2443.31				0	0
TPEQCPSVVSLLSESYNPHVR	Q99460	N-Term(Dimethyl); C5(Carbamidomethyl)	2427.19				0	0
GLGTDEDTIIDIITHR	P08133	N-Term(Dimethyl)	1796.93	0.685347	0.849719	0.807465	0	0
GPLHHATVLGHTGQVCLFLK	A0A087X1H5	N-Term(Dimethyl); C16(Carbamidomethyl); K20(Dimethyl)	2241.23			1.00162	0	0
FGVEQDVDMVFASFIR	P14618;H3BR70	N-Term(Dimethyl)	1887.93				0	0
LLGGQIGLEDFIFAHVK	O14908	N-Term(Dimethyl); K17(Dimethyl)	1913.08				0	0
HCIMQANAEYHQSILAK	Q8WUM4	N-Term(Dimethyl); C2(Carbamidomethyl); K17(Dimethyl)	2070.02	0.615772	0.864443	0.713136	0	0
GFGFVTFADPASVDKVLGQPHHELDSK	B4DHE8	N-Term(Dimethyl); K15(Dimethyl); K27(Dimethyl)	2982.52	1.10519	1.00748	1.09821	0	1
ILATGANVILTTGGIDDMCLK	P17987	N-Term(Dimethyl); C19(Carbamidomethyl); K21(Dimethyl)	2232.19	1.0413	0.851243	1.22465	0	0
WGDAGAEYVVESTGVFTTMEK	P04406	N-Term(Dimethyl); K21(Dimethyl)	2333.09	0.57187	0.789642	0.892904	0	0
GQLTTDQVFPYPSVLNEEQTQFLK	P49748	N-Term(Dimethyl); K24(Dimethyl)	2838.46	0.92932	1.0037	0.926941	0	0
YFAGNLASGGAAGATSLCFVYPLDFAR	P12235;P12236	N-Term(Dimethyl); C18(Carbamidomethyl)	2824.37				0	0
HQDVFNQPTLNSFMGLGQAAWK	P16930	N-Term(Dimethyl); K22(Dimethyl)	2545.26	0.530169	1.15254	0.46052	0	0
VDINAPDVDVHGPDWHLK	Q09666	N-Term(Dimethyl); K18(Dimethyl)	2083.05	1.34264	0.982279	1.36841	0	0
SLDADHAPLQQFFVVMEHCLK	Q96T51	N-Term(Dimethyl); C19(Carbamidomethyl); K21(Dimethyl)	2541.25	1.04888	0.8418	1.2474	0	0
DLGLPTEAYISVEEVHDDGTPTSK	P51665	N-Term(Dimethyl); K24(Dimethyl)	2629.28	0.933838	0.927979	1.00745	0	0
ATDAMAHVAGFTVAHDVSAR	Q96GK7	N-Term(Dimethyl)	2055	1.02392	0.85649	1.19683	0	0
GADDAMESSKPGPVQVVLVQK	Q6DD88	N-Term(Dimethyl); K10(Dimethyl); K21(Dimethyl)	2239.19			1.08524	0	0
LLETELLQEISEIEKR	Q8TDB6	N-Term(Dimethyl); K15(Dimethyl)	1999.12	0.522349	1.2229	0.42762	0	1
ELFSPLHALNFGIGGDGTQHVLWR	Q15102	N-Term(Dimethyl)	2692.4	0.994325	0.882025	1.12859	0	0
GQFSTDELVAEVEKR	Q00610	N-Term(Dimethyl); K14(Dimethyl)	1763.91	0.902857	0.973924	1.04159	0	1
GIVDQSQQAYQEAFEISK	P63104	N-Term(Dimethyl); K18(Dimethyl)	2097.04				0	0
VATAQDDITGDGTTSNVLIIGELLK	P40227	N-Term(Dimethyl); K25(Dimethyl)	2600.4	1.0863	1.05663	0.976229	0	0
AYHEQLSVAEITNACFEPANQMVK	P68363;Q71U36	N-Term(Dimethyl); C15(Carbamidomethyl); M22(Oxidation); K24(Dimethyl)	2822.34				0	0
ANVPNKVIQCFAETGQVQK	Q00610	N-Term(Dimethyl); K6(Dimethyl); C10(Carbamidomethyl); K19(Dimethyl)	2215.19	1.05419	0.935351	1.12832	0	1
LIDDYGVEEEPAELPEGTSLTVDNKR	Q00577	N-Term(Dimethyl); K25(Dimethyl)	2945.46	0.595265	0.810599	0.735179	0	1
DGTVLCELINALYPEGQAPVK	P37802	N-Term(Dimethyl); C6(Carbamidomethyl); K21(Dimethyl)	2343.22				0	0
LLREELQLLQEQGSYVGEVVR	P62195	N-Term(Dimethyl)	2486.36	0.89658	1.12768	0.795958	0	1
EEIVDKYDLFVGSQATDFGEALVR	O43852	N-Term(Dimethyl); K6(Dimethyl)	2757.39	0.883778	0.905529	0.977079	0	1
CIALAQLLVEQNFPAIAIHR	Q13838	N-Term(Dimethyl); C1(Carbamidomethyl)	2305.28				0	0
YYSSEYHYVGGFYGGCNEALMK	P53634	N-Term(Dimethyl); C16(Carbamidomethyl); K22(Dimethyl)	2651.15	0.342019	0.647628	0.630881	0	0
IMQSSSEVGYDAMAGDFVNMVEK	P10809	N-Term(Dimethyl); K23(Dimethyl)	2564.16				0	0
QTIGNSCGTIGLIHAVANNQDK	P09936	N-Term(Dimethyl); C7(Carbamidomethyl); K22(Dimethyl)	2367.2	0.717931	0.912519	0.787643	0	0
FIIHAPPGEFNEVFNDVR	P47755	N-Term(Dimethyl)	2129.07	1.36188	1.33867	1.01848	0	0
SAVDQAGGAQIVIDHLR	P52306	N-Term(Dimethyl)	1777.95				0	0
MVMPSWFDLMGLSPDAPEDEAGIKK	O95372	N-Term(Dimethyl); K24(Dimethyl); K25(Dimethyl)	2848.4	1.05347	1.04023	1.01387	0	1
EAATQAQQTLGSTIDK	P47897	N-Term(Dimethyl); K16(Dimethyl)	1717.9	1.09424	1.11961	0.978447	0	0
MAAISESNINLCGSHCGVSIGEDGPSQMALEDLAMFR	P29401	N-Term(Dimethyl); N10(Deamidated); C12(Carbamidomethyl); C16(Carbamidomethyl)	3996.8				0	0
FKHLEEAFTSEHWLVR	Q8TCJ2	N-Term(Dimethyl); K2(Dimethyl)	2085.09				0	1
MAEDEAETIGNLIEECGGLEK	O00629	N-Term(Dimethyl); C16(Carbamidomethyl); K21(Dimethyl)	2364.09	1.10073	1.18481	0.930083	0	0
LFADAGLVCITSFISPFAK	O95340	N-Term(Dimethyl); C9(Carbamidomethyl); K19(Dimethyl)	2113.13	0.256848	0.242091	1.06215	0	0
AGKPVICATQMLESMIK	P14618;H3BR70	N-Term(Dimethyl); K3(Dimethyl); C7(Carbamidomethyl); K17(Dimethyl)	1961.06				0	0
QTFTGHESDINAICFFPNGNAFATGSDDATCR	P62873	N-Term(Dimethyl); C14(Carbamidomethyl); C31(Carbamidomethyl)	3549.54	1.32565	1.06494	1.24621	0	0
YASICQQNGIVPIVEPEILPDGDHDLK	P04075	N-Term(Dimethyl); C5(Carbamidomethyl); K27(Dimethyl)	3076.56				0	0
DVPVAEEVSALFAGELNPVAPK	O14617	N-Term(Dimethyl); K22(Dimethyl)	2308.24	0.985751	1.07645	0.916777	0	0
ATDLRPIYISVQPPSLHVLEQR	Q16774	N-Term(Dimethyl)	2560.42	1.01042	0.996551	1.01506	0	0
GATDIDKNGYPDLIVGAFGVDR	P06756	N-Term(Dimethyl); K7(Dimethyl); N8(Deamidated)	2350.19	1.31056	1.0012	1.31046	0	1
ADDPSSYMEVVQAANTSGNWEELVK	Q00610	N-Term(Dimethyl); K25(Dimethyl)	2796.3	1.16662	1.06105	1.08607	0	0
VILEDVAMLHIKPDQFTYTSDHFETIMK	P07814	N-Term(Dimethyl); K12(Dimethyl); K28(Dimethyl)	3405.74				0	0
CQFGLAQECLHHAQDYGGLLLLATASGNANMVNK	P35606	N-Term(Dimethyl); C1(Carbamidomethyl); C9(Carbamidomethyl); K34(Dimethyl)	3757.8	1.1256	1.1689	0.96404	0	0
NMAEQIIQEIYSQIQSK	P29401	N-Term(Dimethyl); K17(Dimethyl)	2079.07				0	0
FVDGLMIHSGDPVNYYVDTAVR	P23396	N-Term(Dimethyl)	2496.22	1.55758	1.41896	1.09893	0	0
YLQEVIDVLETDGHFR	Q02818	N-Term(Dimethyl)	1961.99	0.64321	0.973564	0.661419	0	0
FLEQVHQLYDDSFPMEIR	P42224	N-Term(Dimethyl)	2295.1	1.27116			0	0
FRAPPILPPHLLQVILNK	Q9Y478	N-Term(Dimethyl); K18(Dimethyl)	2122.32	0.641523	0.827046	0.776554	0	1
QVASHVGLHSASIPGILALDLCPSDTNK	Q9UMS4	N-Term(Dimethyl); C22(Carbamidomethyl); K28(Dimethyl)	2956.55				0	0
YGDSEFTVQSTTGHCVHMR	P52597	N-Term(Dimethyl); C15(Carbamidomethyl)	2239.98	1.09651	0.970824	1.13074	0	0
ELMGEEILGASLSAPLTSYK	Q9P2J5	N-Term(Dimethyl); K20(Dimethyl)	2165.13				0	0
TGLIPSNYVAEQAESIDNPLHEAAK	Q92882	N-Term(Dimethyl); K25(Dimethyl)	2723.38	0.360672	0.497084	0.726394	0	0
TAEDYQALNKDIEAQLQHAGLR	O95479	N-Term(Dimethyl); K10(Dimethyl)	2540.3	0.616834	0.850731	0.72588	0	1
HYLPLSSILDTLDVMAYNK	H3BS10	N-Term(Dimethyl); K19(Dimethyl)	2249.18	0.837589	0.657703	1.27494	0	0
TETVEEPMEEEEAAKEEK	P14625	N-Term(Dimethyl); K15(Dimethyl); K18(Dimethyl)	2192.01	0.600161	1.01447	0.592269	0	1
LVNACLAEELPHIHAFEQK	Q9H3K6	N-Term(Dimethyl); C5(Carbamidomethyl); K19(Dimethyl)	2275.18	0.8848	0.993647	0.89146	0	0
GIIWGEDTLMEYLENPKK	C9JFR7	N-Term(Dimethyl); K17(Dimethyl); K18(Dimethyl)	2220.16	1.32456			0	1
YKLDFSLQPETGPGNLIDPIHEFK	Q5K651	N-Term(Dimethyl); K2(Dimethyl); K24(Dimethyl)	2842.49				0	1
STMDNPTTTQYASLMHSFILK	Q9NP97	N-Term(Dimethyl); K21(Dimethyl)	2442.2				0	0
VNIAFNYDMPEDSDTYLHR	Q13838	N-Term(Dimethyl)	2328.05	0.943074	0.858452	1.09981	0	0
DFSALESQLQDTQELLQEENR	P35579	N-Term(Dimethyl)	2521.2	1.20896	1.08068	1.11996	0	0
TTTHVPPELGQIMDSETFEK	O75844	N-Term(Dimethyl); K20(Dimethyl)	2316.13	1.01001	1.12011	0.902725	0	0
DGEDQTQDTELVETRPAGDGTFQK	P30455;P10321;Q09160;Q9TNN7;Q31612;Q29963;P01892	N-Term(Dimethyl); K24(Dimethyl)	2693.25				0	0
AGLLHNILPSQSTDLHHSVGTELLSLVYK	P78527	N-Term(Dimethyl); K29(Dimethyl)	3198.74	1.2959	1.10868	1.17019	0	0
ICDPGLTAFEPEALGNLVEGMDFHR	D6R938;E9PBG7	N-Term(Dimethyl); C2(Carbamidomethyl)	2816.33				0	0
TVWDWELMNDIKPIWQRPSK	P14625	N-Term(Dimethyl); N9(Deamidated); K12(Dimethyl); K20(Dimethyl)	2627.36				0	0
ALSVGNIDDALQCYSEAIK	P31948	N-Term(Dimethyl); C13(Carbamidomethyl); K19(Dimethyl)	2123.06	1.05268	1.0171	1.03615	0	0
LATDKNDPHLCDFIETHYLNEQVK	P02794	N-Term(Dimethyl); K5(Dimethyl); C11(Carbamidomethyl); K24(Dimethyl)	2984.47	0.687668	0.875785	0.786087	0	1
YHTSQSGDEMTSLSEYVSR	P08238	N-Term(Dimethyl)	2204.97	1.13012	1.0945	1.03371	0	0
MQEAMTQEVSDVFSDTTTPIK	P18206	N-Term(Dimethyl); K21(Dimethyl)	2414.13	1.10996	0.913875	1.22809	0	0
VGMGSGSICITQEVLACGRPQATAVYK	P12268	N-Term(Dimethyl); C9(Carbamidomethyl); C17(Carbamidomethyl); K27(Dimethyl)	2909.48	1.31957	1.17408	1.12518	0	0
GIIVHTMAAVEALGAK	O95573	N-Term(Dimethyl); K16(Dimethyl)	1636.94	1.45123	0.979774	1.48286	0	0
GVDVVVGGHSNTFLYTGNPPSK	P21589	N-Term(Dimethyl); K22(Dimethyl)	2301.18			0.167693	0	0
SGDTLLLLHHGDFSAEEVFHR	Q9BTV4	N-Term(Dimethyl)	2408.19	1.20654	1.11802	1.08039	0	0
GFGFGQGAGALVHSE	P21291	N-Term(Dimethyl)	1461.71	0.509974	1.92646	0.265019	0	0
ANQAIQMACQSLGEPGCTQAQVLSAATIVAK	Q9Y490	N-Term(Dimethyl); C9(Carbamidomethyl); C17(Carbamidomethyl); K31(Dimethyl)	3272.65				0	0
HLYTLDGGDIINALCFSPNR	P63244	N-Term(Dimethyl); C15(Carbamidomethyl)	2304.14	1.17236	1.02665	1.14321	0	0
ALGVEQDLALPAIAVIGDQSSGK	P20591;P20592	N-Term(Dimethyl); K23(Dimethyl)	2308.26				0	0
NTNDANSCQIIIPQNQVNR	P50395;P31150	N-Term(Dimethyl); C8(Carbamidomethyl)	2227.09				0	0
QLSQSLLPAIVELAEDAK	P30153	N-Term(Dimethyl); K18(Dimethyl)	1981.12	0.887511	0.996042	0.892042	0	0
LVEGLQGQTWAPDWVEELR	A1L0T0	N-Term(Dimethyl)	2254.15	0.939593	0.974341	0.965423	0	0
SGDAAIVDMVPGKPMCVESFSDYPPLGR	P68104	N-Term(Dimethyl); K13(Dimethyl); C16(Carbamidomethyl)	3051.45	1.43042	1.08254	1.32284	0	0
YSVLQQHAEANGVDGVDALDTASHTNK	Q99523	N-Term(Dimethyl); K27(Dimethyl)	2896.4	0.520185	0.64709	0.804789	0	0
VACVQVVIIPCGITNALSEEDKEALIAK	P07814	N-Term(Dimethyl); C3(Carbamidomethyl); C11(Carbamidomethyl); K22(Dimethyl); K28(Dimethyl)	3124.7				0	1
LVANHVASDISLTGGSVVQR	Q9UBV2	N-Term(Dimethyl)	2051.12				0	0
VPSTETEALASNLMGMFEK	P31150	N-Term(Dimethyl); K19(Dimethyl)	2111.03	0.857432	0.898502	0.955366	0	0
VLELSIPASAEQIQHLAGAIAER	P55268	N-Term(Dimethyl)	2444.34				0	0
MVVNEGSDGGQSVYHVHLHVLGGR	P49773	N-Term(Dimethyl)	2575.28	0.833921	0.880803	0.94784	0	0
DAFDRNPELQNLLLDDFFK	P52209	N-Term(Dimethyl); K19(Dimethyl)	2366.19	0.926274	1.01277	0.915627	0	1
HGVQELEIELQSQLSK	P35527	N-Term(Dimethyl); K16(Dimethyl)	1894.02				0	0
EAATAVEQEKEILLEMIHSIQNSQDMR	O95816	N-Term(Dimethyl); K10(Dimethyl)	3169.57	1.36182	1.24395	1.09599	0	1
AATFGLILDDVSLTHLTFGK	P35232	N-Term(Dimethyl); K20(Dimethyl)	2175.2				0	0
TDPHLCDFLETHFLDEEVK	P02792	N-Term(Dimethyl); C6(Carbamidomethyl); K19(Dimethyl)	2401.13			0.896934	0	0
LVTSPCCIVTSTYGWTANMER	P07900	N-Term(Dimethyl); C6(Carbamidomethyl); C7(Carbamidomethyl)	2474.14	1.14927	0.947334	1.21453	0	0
QQSHFAMMHGGTGFAGIDSSSPEVK	Q15365	N-Term(Dimethyl); K25(Dimethyl)	2662.23				0	0
VCLLGCGISTGYGAAVNTAK	P11766	N-Term(Dimethyl); C2(Carbamidomethyl); C6(Carbamidomethyl); K20(Dimethyl)	2068.05	0.559566	0.68189	0.821534	0	0
GLSEDTTEETLKESFDGSVR	P19338	N-Term(Dimethyl); K12(Dimethyl)	2256.08	0.967764	0.860618	0.922838	0	1
FQSSAVMALQEACEAYLVGLFEDTNLCAIHAK	P68431	N-Term(Dimethyl); C13(Carbamidomethyl); C27(Carbamidomethyl); K32(Dimethyl)	3642.76				0	0
AVLSAEQLRDEEVHAGLGELLR	P50454	N-Term(Dimethyl)	2433.3	1.26484	1.27382	0.99407	0	1
MNGFIDQIDGIVHFETR	Q9BT78	N-Term(Dimethyl)	2019.99	0.842386	0.767974	1.09813	0	0
SKVDEAVAVLQAHHAK	B1ANR0	N-Term(Dimethyl); K2(Dimethyl); K16(Dimethyl)	1787.01				0	1
GYGYGQGAGTLSTDKGESLGIK	P21291	N-Term(Dimethyl); K15(Dimethyl); K22(Dimethyl)	2243.15			0.717774	0	1
STPAITLESPDIKYPLR	P00387	N-Term(Dimethyl); K13(Dimethyl)	1957.1	0.664712	0.770109	0.864112	0	1
LEVGIQAMEHLIHVLQTDR	O60763	N-Term(Dimethyl)	2230.2	1.05233	1.11453	0.945253	0	0
SALSGHLETVILGLLK	P07355	N-Term(Dimethyl); K16(Dimethyl)	1707.04	2.00627	1.29974	1.54534	0	0
HTDNVIQWLNAMDEIGLPK	P46940	N-Term(Dimethyl); K19(Dimethyl)	2250.14				0	0
LALSQNQQSSGAAGPTGKNEEK	O95232	N-Term(Dimethyl); K18(Dimethyl); K22(Dimethyl)	2299.19				0	1
RGHVFEESQVAGTPMFVVK	P13639	N-Term(Dimethyl); K19(Dimethyl)	2174.13		0.832478		0	1
NADMSEEMQQDSVECATQALEK	P63167	N-Term(Dimethyl); C15(Carbamidomethyl); K22(Dimethyl)	2570.1	0.875002	1.0612	0.913421	0	0
ALEEQNELLSAELGGLR	P48681	N-Term(Dimethyl)	1869.99	2.28274	1.51958	1.50391	0	0
ATENDIYNFFSPLNPVR	P31943;P52597	N-Term(Dimethyl)	2025				0	0
LHDINAQMVEDQGFLDSLR	P63010	N-Term(Dimethyl)	2229.09				0	0
NSDRTPLVSVLLEGPPHSGK	I3L0N3	N-Term(Dimethyl); K20(Dimethyl)	2159.18	0.743838			0	1
IGDQEFDSLPALLEFYK	P46108	N-Term(Dimethyl); K17(Dimethyl)	2041.05	1.11395	1.00269	1.11221	0	0
LALQQDLTSMAPGLVIQAVR	E5RHW4	N-Term(Dimethyl)	2152.21				0	0
ISVIVETVYTHVLHPYPTQITQSEK	P04843	N-Term(Dimethyl); K25(Dimethyl)	2938.59				0	0
ELASQPDVDGFLVGGASLKPEFVDIINAK	P60174	N-Term(Dimethyl); K19(Dimethyl); N27(Deamidated); K29(Dimethyl)	3114.66	0.673757	0.835872	0.806961	0	0
GFDQTINLILDESHER	F2Z2Y6	N-Term(Dimethyl)	1914.95	0.855731	1.0014	0.855493	0	0
GLGTDEESILTLLTSR	P08758	N-Term(Dimethyl)	1732.93	0.752672	0.805743	0.942896	0	0
GQVLSTINTNQMNNTHAAVSPCGR	E9PF19	N-Term(Dimethyl); C22(Carbamidomethyl)	2598.25	1.09396	1.24439	0.880106	0	0
MAVTFIGNSTAIQELFK	P07437	N-Term(Dimethyl); K17(Dimethyl)	1926.03	0.908237	0.692754	0.99391	0	0
EGNDLYHEMIESGVINLK	P06576	N-Term(Dimethyl); K18(Dimethyl)	2117.05	1.2442	1.09253	1.1401	0	0
GHYTEGAELVDSVLDVVR	Q9BVA1;Q13885;P07437;P68371;Q13509	N-Term(Dimethyl)	1987.01				0	0
LKDLNSQADSLMTSSAFDTSQVK	Q13813	N-Term(Dimethyl); K2(Dimethyl); K23(Dimethyl)	2570.29	0.652093	0.592328	1.10214	0	1
EIGWTDVGGWTGQGGSILGTK	Q01813	N-Term(Dimethyl); K21(Dimethyl)	2175.11	0.801746	0.937567	0.856098	0	0
VLESINVQMDENTLHEILNEVDLNK	P43304	N-Term(Dimethyl); K25(Dimethyl)	2965.5				0	0
TGLIPSNYVAEQAESIDNPLHEAAKR	Q92882	N-Term(Dimethyl); K25(Dimethyl)	2879.48	0.413201	0.588765	0.702601	0	1
IAQLEEELEEEQGNTELINDR	P35579	N-Term(Dimethyl)	2500.2				0	0
EALGHWLGLLNADGWIGR	Q13724	N-Term(Dimethyl)	2006.06	0.970736	1.19284	0.814717	0	0
QLAPIWDKLGETYKDHENIVIAK	P07237	N-Term(Dimethyl); K8(Dimethyl); K14(Dimethyl); K23(Dimethyl)	2793.55	0.675407	0.877202	0.770823	0	2
AFLASPEYVNLPINGNGK	P09211	N-Term(Dimethyl); N14(Deamidated); N16(Deamidated); K18(Dimethyl)	1962.03	0.220108	0.948763	0.827115	0	0
MKDVPGFLQQSQNSGPGQPAVWHR	Q9UNM6	N-Term(Dimethyl); K2(Dimethyl)	2720.37	0.858948	1.44972	0.593159	0	1
QAVSMFLGAVEEAKK	P49419	N-Term(Dimethyl); K14(Dimethyl); K15(Dimethyl)	1691.93				0	1
GILSGTSDLLLTFDEAEVRK	P18206	N-Term(Dimethyl); K20(Dimethyl)	2220.2				0	1
MWSIENIAFGSGGGLLQK	P43490	N-Term(Dimethyl); K18(Dimethyl)	1964.02	0.723984	0.834666	0.868371	0	0
AQPVQVAEGSEPDGFWEALGGK	A0A0A0MS51	N-Term(Dimethyl); K22(Dimethyl)	2328.15	0.625049	0.730569	0.835288	0	0
NLSEIENVHGFVSHSHISPIK	A0A0C4DFT3	N-Term(Dimethyl); K21(Dimethyl)	2400.26				0	0
RCEAFGWHAIIVDGHSVEELCK	P29401	N-Term(Dimethyl); C2(Carbamidomethyl); C21(Carbamidomethyl); K22(Dimethyl)	2669.29	0.686137	0.767281	0.895253	0	1
LVLEQVVTSIASVADTAEEK	O00410	N-Term(Dimethyl); K20(Dimethyl)	2158.18	1.0941	0.763145	1.43529	0	0
RYNEDLELEDAIHTAILTLK	P25787	N-Term(Dimethyl); K20(Dimethyl)	2413.29	0.875146	0.854511	1.0253	0	1
ENALVQMADGNQAQLAMSHLNGHK	A6NLN1	N-Term(Dimethyl); N21(Deamidated); K24(Dimethyl)	2634.27	1.05161	1.02844	1.01384	0	0
LAAAQAAGLAAAHSVR	Q6QNY0	N-Term(Dimethyl)	1505.85	0.944098	1.06648	0.886248	0	0
GFFDPNTHENLTYLQLLER	Q15149	N-Term(Dimethyl)	2335.16	1.17251	1.05549	1.11212	0	0
GFFDPNTHENLTYLQLLQR		N-Term(Dimethyl); Q18(Deamidated)	2335.16				0	0
FGGNPGGFGNQGGFGNSR	A0A087WX29	N-Term(Dimethyl)	1754.79	0.954737	0.999671	0.956127	0	0
MGEDMHTIGFGIYEVPEELSGQTNIHLSK	P17655	N-Term(Dimethyl); K29(Dimethyl)	3288.57				0	0
TVLELMNPEAQLPQVYPFAADLYQK	P46940	N-Term(Dimethyl); K25(Dimethyl)	2934.52	0.798011	0.906269	0.881537	0	0
ILMAAPGMAIPPFIMNTLEK	Q9H9B4	N-Term(Dimethyl); K20(Dimethyl)	2214.2				0	0
TLTAVHDAILEDLVFPSEIVGK	P62081	N-Term(Dimethyl); K22(Dimethyl)	2423.34				0	0
QKGADFLVTEVENGGSLGSK	P14618	N-Term(Dimethyl); K2(Dimethyl); N13(Deamidated); K20(Dimethyl)	2121.1	0.73244	0.827376	0.875281	0	1
HTGPGILSMANAGPNTNGSQFFICTAK	P62937	N-Term(Dimethyl); M9(Oxidation); C24(Carbamidomethyl); K27(Dimethyl)	2863.38				0	0
AVEEKIEWLESHQDADIEDFK	P11021	N-Term(Dimethyl); K5(Dimethyl); K21(Dimethyl)	2615.27				0	1
FGQAATMEGIGAIGGTPPAFNR	Q15233	N-Term(Dimethyl)	2191.09				0	0
SAAPHPGDIGDFINEGLK	P19022	N-Term(Dimethyl); K18(Dimethyl)	1893.97	1.01522	1.19538	0.850246	0	0
THVTHHPISDHEATLR	P13747;P30483;P18463;P30462;P30492;Q31612;P30466;P10321	N-Term(Dimethyl)	1878.95				0	0
ELYLSHNGIEVIEGLENNNK	Q15435	N-Term(Dimethyl); K20(Dimethyl)	2341.2				0	0
LVTLISQQATLLASNEAFKK	P51572	N-Term(Dimethyl); K19(Dimethyl); K20(Dimethyl)	2259.33	0.751687	1.67322	0.449751	0	1
TCEEHQLCVVAVLPHILDTGAAGR	Q15084	N-Term(Dimethyl); C2(Carbamidomethyl); C8(Carbamidomethyl)	2674.34	0.999802	1.01671	0.984473	0	0
RKDPELWGSVLLESNPYR	Q00610	N-Term(Dimethyl); K2(Dimethyl)	2215.18	1.52785	1.58825	0.96305	0	2
LAELEEFINGPNNAHIQQVGDR	Q00610	N-Term(Dimethyl)	2492.24	1.15109	1.03624	1.10025	0	0
LLLAGYDDFNCNVWDALK	P62873	N-Term(Dimethyl); C11(Carbamidomethyl); K18(Dimethyl)	2183.07				0	0
TVQVVPHITDAIQEWVMR	P17812	N-Term(Dimethyl)	2150.14	1.19477	1.32225	0.904603	0	0
ALPLTQGQLVLVWSDEHVGSK	P35475	N-Term(Dimethyl); K21(Dimethyl)	2333.29	0.499675	1.19554	0.418418	0	0
VLEDNKLPGAICSLTCGGADIGTAMAK	P49419	N-Term(Dimethyl); K6(Dimethyl); C12(Carbamidomethyl); C16(Carbamidomethyl); K27(Dimethyl)	2846.44				0	1
TAEHEAAQQDLQSK	Q86UP2	N-Term(Dimethyl); K14(Dimethyl)	1611.79	1.00112	0.922629	1.0863	0	0
YGIVDYMIEQSGPPSK	P13667	N-Term(Dimethyl); K16(Dimethyl)	1839.91	0.895287	1.02883	0.871182	0	0
AFTHTAQYDEAISDYFR	P31939	N-Term(Dimethyl)	2062.94	0.969397	1.48699	0.763442	0	0
AKNEILDEVISLSQVTPK	E5KLJ5	N-Term(Dimethyl); K2(Dimethyl); K18(Dimethyl)	2068.19	1.22124	1.03398	1.18244	0	1
TTITTTTTSSSGLGSPMIVGSPR	C9JJV6	N-Term(Dimethyl)	2280.17	1.06567	1.12836	0.945505	0	0
SKEEQELHDIHSTR	P51674	N-Term(Dimethyl); K2(Dimethyl)	1764.88	0.729488	1.02575	0.695915	0	1
EFTMAEIEHFVDPSEKDHPK	P41250	N-Term(Dimethyl); K16(Dimethyl); K20(Dimethyl)	2470.19	1.12181	1.00127	1.12165	0	1
AKPVATAPIPGTPWCVVWTGDER	O14776	N-Term(Dimethyl); K2(Dimethyl); C15(Carbamidomethyl)	2564.34			1.39101	0	0
SYDVPPPPMEPDHPFYSNISK	P18669	N-Term(Dimethyl); K21(Dimethyl)	2473.17	0.543543	0.695352	0.796026	0	0
EGGGNNLYGEEMVQALK	P48637	N-Term(Dimethyl); K17(Dimethyl)	1864.91	0.834412	0.842872	0.991078	0	0
CEHDGVMTGANGEVSFINIK	O15371	N-Term(Dimethyl); C1(Carbamidomethyl); K20(Dimethyl)	2234.05	1.46673	1.46339	1.00341	0	0
ETPFLSNPGTNLVFEDEITALQPEVDKLK	P21589	N-Term(Dimethyl); K27(Dimethyl); K29(Dimethyl)	3328.75	0.39496	0.919321	0.430105	0	1
QIVWNGPVGVFEWEAFAR	P00558	N-Term(Dimethyl)	2133.09	0.479051	0.688393	0.696681	0	0
ANCIDSTASAEAVFASEVKK	P22087	N-Term(Dimethyl); C3(Carbamidomethyl); K19(Dimethyl); K20(Dimethyl)	2182.1				0	1
SFGMTPVLPAFAGHVPEAVTR	P54802	N-Term(Dimethyl)	2212.15	0.57549	0.741454	0.777038	0	0
TFTDCFNCLPIAAIVDEK	P62140;F8VYE8;P62136	N-Term(Dimethyl); C5(Carbamidomethyl); C8(Carbamidomethyl); K18(Dimethyl)	2170.05				0	0
YLPELMAEKDSLDPSFTHAMQLLTAEIEK	Q07666	N-Term(Dimethyl); K9(Dimethyl); K29(Dimethyl)	3404.73	0.923524	0.935384	0.988433	0	1
TVNELQNLTSAEVIVPR	Q9Y6M1	N-Term(Dimethyl)	1911.05	1.69061	1.22865	1.37755	0	0
ILDDDTIITTLENLKR	Q14204	N-Term(Dimethyl); K15(Dimethyl)	1929.09	1.16288	1.00118	1.16282	0	1
QLAPGMVQQMQSVCSDCNGEGEVINEK	O60884	N-Term(Dimethyl); C14(Carbamidomethyl); C17(Carbamidomethyl); K27(Dimethyl)	3064.38	1.25899	1.09254	1.15364	0	0
TGQPMIHIYLDKETGKPK	B0QYK0	N-Term(Dimethyl); K12(Dimethyl); K16(Dimethyl); K18(Dimethyl)	2168.21	0.0263026			0	1
LFNHLSAVSESIQALGWVAMAPKPGPYVK	Q01518	N-Term(Dimethyl); K23(Dimethyl); K29(Dimethyl)	3194.74	0.846718	1.09002	0.777666	0	0
QMLVNAFTEQILPHFSTEGPQR	Q53FA7	N-Term(Dimethyl)	2571.3	0.934519	0.967668	0.966831	0	0
HILLAVANDEELNQLLK	O75367;Q9P0M6	N-Term(Dimethyl); K17(Dimethyl)	1989.13				0	0
GYIFLEYASPAHAVDAVK	P55884	N-Term(Dimethyl); K18(Dimethyl)	2007.04	1.28936	1.2202	1.05787	0	0
QLPDKWQHDLFDSGFGGGAGVETGGK	Q86V81	N-Term(Dimethyl); K5(Dimethyl); K26(Dimethyl)	2787.36	0.861295	0.715106	1.07041	0	1
ALSAVHSPTFCQLACGQDGQLK	A0A087WZ13	N-Term(Dimethyl); C11(Carbamidomethyl); C15(Carbamidomethyl); K22(Dimethyl)	2444.2				0	0
TGEAQIHAHLVRPYVGIHLR	Q9H488	N-Term(Dimethyl)	2295.28	0.784146	0.828497	0.987303	0	0
INMAHLCVIGSHAVNGVAR	P11216	N-Term(Dimethyl); C7(Carbamidomethyl); N15(Deamidated)	2048.05	1.19055	1.0493	1.15171	0	0
TVLELQYVLDKLGDDEVR	Q14444	N-Term(Dimethyl); K11(Dimethyl)	2161.17	0.841047	0.992402	0.848441	0	1
YSTKPDAVFAGAMPTMASVK	Q2PZI1	N-Term(Dimethyl); K4(Dimethyl); K20(Dimethyl)	2156.11	0.797209	0.80077	0.996675	0	0
EGNASGVSLLEALDTILPPTRPTDKPLRLPLQDVYK	Q05639	N-Term(Dimethyl); K25(Dimethyl); K36(Dimethyl)	4001.22				0	1
LKGEMMDLQHGSLFLQTPK	P07195	N-Term(Dimethyl); K2(Dimethyl); K19(Dimethyl)	2257.19	0.615213	0.668186	0.921758	0	1
EMITMLHYDLLHHPYEPSGNKK	Q99459	N-Term(Dimethyl); K21(Dimethyl); K22(Dimethyl)	2737.38	0.980242	0.982349	0.998978	0	1
GQYFGELALVTNKPR	P31323;P13861	N-Term(Dimethyl); K13(Dimethyl)	1748.97				0	0
IAIPGLAGAGNSVLLVSNLNPER	A6NLN1	N-Term(Dimethyl)	2303.3	1.14315	1.11246	1.02874	0	0
LGNNCVFAPADVTSEKDVQTALALAK	Q99714	N-Term(Dimethyl); C5(Carbamidomethyl); K16(Dimethyl); K26(Dimethyl)	2816.48				0	1
LALVTGGEIASTFDHPELVK	P78371	N-Term(Dimethyl); K20(Dimethyl)	2153.18	0.810632	0.848021	0.956988	0	0
QQHQEQQALQQSTTAK	Q15075	N-Term(Dimethyl); K16(Dimethyl)	1909.96	0.910249	0.995101	0.915761	0	0
VLFRPSDTANSSNQDALSSNTSLK	Q8N4V1	N-Term(Dimethyl); K24(Dimethyl)	2608.31				0	0
SFANTLVDVCAYAGSGNVLK	Q13200	N-Term(Dimethyl); C10(Carbamidomethyl); K20(Dimethyl)	2142.09	0.931811	1.14338	0.815878	0	0
TISAQNMDILQNPLMIK	P17050	N-Term(Dimethyl); K17(Dimethyl)	1986.07	0.231733	0.365002	0.635596	0	0
AYPDVAALSDGYWVVSNR	O14773	N-Term(Dimethyl)	2010.99	0.589425	0.741812	0.79547	0	0
IGKVDCTQHYELCSGNQVR	Q86UY0	N-Term(Dimethyl); K3(Dimethyl); C6(Carbamidomethyl); C13(Carbamidomethyl)	2320.11	0.901981	0.968328	0.932532	0	1
VTTVASHTSDSDVPSGVTEVVVK	P10909	N-Term(Dimethyl); K23(Dimethyl)	2370.23	0.786233	0.96598	0.81484	0	0
VVLLGEFLHPCEDDIVCK	Q9NY12	N-Term(Dimethyl); C11(Carbamidomethyl); C17(Carbamidomethyl); K18(Dimethyl)	2199.11	0.88144	0.810761	1.00639	0	0
TFHIFYQLLSGAGEHLK	P35580	N-Term(Dimethyl); K17(Dimethyl)	2017.09	0.662376	0.756413	0.876667	0	0
GPSGQGQGQFLIQQVTLK	Q13724	N-Term(Dimethyl); K18(Dimethyl)	1942.07	0.751698	0.827553	0.909361	0	0
NLGSLLKPGGFLVIMDALK	P40261	N-Term(Dimethyl); K7(Dimethyl); K19(Dimethyl)	2070.24	0.409973	0.534367	0.768076	0	0
NGPLEVAGAAVSAGHGLPAK	O75367	N-Term(Dimethyl); K20(Dimethyl)	1872.03	0.663126	1.60461	0.526432	0	0
IANDNSLNHEYLPILGLAEFR	P17174	N-Term(Dimethyl)	2427.26	0.870674	0.822597	1.05964	0	0
FAHIDGDHLTLLNVYHAFK	O43143	N-Term(Dimethyl); K19(Dimethyl)	2267.19	0.934956	0.893935	1.04707	0	0
LGFDISEQEVTAPAPAACQILK	Q9H008	N-Term(Dimethyl); C18(Carbamidomethyl); K22(Dimethyl)	2414.26	0.91832	0.849936	1.08168	0	0
VISTMSVGIDHLALDEIKK	Q9UBQ7	N-Term(Dimethyl); K18(Dimethyl); K19(Dimethyl)	2153.22				0	1
FQSSHHPTDITSLDQYVER	P14625	N-Term(Dimethyl)	2288.09	0.906984	1.08109	0.834825	0	0
QLFALSCTAEEQGVLPDDLSGVIR	P04899	N-Term(Dimethyl); C7(Carbamidomethyl)	2646.34				0	0
TFNTSTGGLLLPSDTKR	P12956	N-Term(Dimethyl); K16(Dimethyl)	1864.01				0	1
RVIISAPSADAPMFVMGVNHEKYDNSLK	P04406	N-Term(Dimethyl); K22(Dimethyl); N25(Deamidated); K28(Dimethyl)	3174.62	0.61869	0.704847	0.878753	0	2
ANALHATNNLQIIPDFSLK	Q9P2R3	N-Term(Dimethyl); K19(Dimethyl)	2136.18				0	0
RKPEDVLDDDDAGSAPLK	P35613	N-Term(Dimethyl); K2(Dimethyl); K18(Dimethyl)	2025.05				0	1
ELEAVCQDVLSLLDNYLIK	P61981	N-Term(Dimethyl); C6(Carbamidomethyl); K19(Dimethyl)	2291.21	0.792288	0.852976	0.929898	0	0
GTVPDDAVEALADSLGKK	E9PCH5	N-Term(Dimethyl); K17(Dimethyl); K18(Dimethyl)	1870.01	1.50128	1.28137	1.17294	0	1
FSDLFSLAEEYEDSSTKPPK	Q68E01	N-Term(Dimethyl); K17(Dimethyl); K20(Dimethyl)	2374.16	0.938062	1.15452	0.813426	0	0
LVQDVANNTNEEAGDGTTTATVLAR	P10809	N-Term(Dimethyl); N10(Deamidated)	2589.28				0	0
AMLQLLQDKDTYSWLLK	P20591	N-Term(Dimethyl); K9(Dimethyl); K17(Dimethyl)	2150.19	0.157438	0.799181	0.197221	0	1
DLALSEGDIHTLGCGVAQCLK	P06756	N-Term(Dimethyl); C14(Carbamidomethyl); C19(Carbamidomethyl); K21(Dimethyl)	2313.14	1.36614	1.11386	1.22787	0	0
LTLVFEHVDQDLTTYLDKVPEPGVPTETIK	Q00534	N-Term(Dimethyl); K18(Dimethyl); K30(Dimethyl)	3481.86	0.531857	0.540007	0.986017	0	1
LSLQNCCLTGAGCGVLSSTLR	P13489	N-Term(Dimethyl); C6(Carbamidomethyl); C7(Carbamidomethyl); C13(Carbamidomethyl)	2295.12	1.02557	0.934259	1.09897	0	0
SGEHDFGAAFDGDGDRNMILGK	P36871	N-Term(Dimethyl); K22(Dimethyl)	2365.08			0.842876	0	1
FATLAELVQYYMEHHGQLK	Q06124	N-Term(Dimethyl); K19(Dimethyl)	2334.19				0	0
FGGEHVPNSPFQVTALAGDQPSVQPPLR	P21333	N-Term(Dimethyl)	2973.51				0	0
DLYANTVLSGGTTMYPGIADR	P60709	N-Term(Dimethyl)	2243.1	0.979997			0	0
VNNSTMLGASGDYADFQYLK	P28070	N-Term(Dimethyl); K20(Dimethyl)	2250.06	1.11759	0.987836	1.13263	0	0
VIDFDENTALDDAEEESFRK	Q14257	N-Term(Dimethyl); K20(Dimethyl)	2399.12	1.03416	1.0046	1.03059	0	1
HEALLYTWLAEHKPLVLCGPPGSGK	Q14204	N-Term(Dimethyl); K13(Dimethyl); C18(Carbamidomethyl); K25(Dimethyl)	2857.55				0	0
TNVLGHLQQGGAPTPFDR	P17858	N-Term(Dimethyl)	1936	1.0497	1.22084	0.860787	0	0
ATESGAQSAPLPMEGVDISPK	Q02790	N-Term(Dimethyl); K21(Dimethyl)	2141.08	1.08805	1.18667	0.917925	0	0
IGGDAATTVNNSTPDFGFGGQK	A0A087WTP3	N-Term(Dimethyl); K22(Dimethyl)	2210.07	1.04002	1.06059	0.995447	0	0
NIYGNIEDLVVHIK	O00116	N-Term(Dimethyl); K14(Dimethyl)	1682.94	1.12778	0.950341	1.05644	0	0
IGPILDNSTLQSEVKPILEK	P30153	N-Term(Dimethyl); K15(Dimethyl); K20(Dimethyl)	2278.32	0.733663	0.84872	0.865408	0	0
QAFDDAIAELDTLNEDSYK	Q04917	N-Term(Dimethyl); K19(Dimethyl)	2214.04	0.452817			0	0
AALAHSEEVTASQVAATK	Q15149	N-Term(Dimethyl); K18(Dimethyl)	1839.98	1.02551	1.26723	0.810164	0	0
TEDSGLQTQVIAAATQCALSTSQLVACTK	Q9Y490	N-Term(Dimethyl); Q16(Deamidated); C17(Carbamidomethyl); C27(Carbamidomethyl); K29(Dimethyl)	3109.55				0	0
EGCEAIVDTGTSLMVGPVDEVR	P07339	N-Term(Dimethyl); C3(Carbamidomethyl)	2362.13	0.689457	0.772952	0.857152	0	0
TKSENGLEFTSSGSANTETTK	P21796	N-Term(Dimethyl); K2(Dimethyl); K21(Dimethyl)	2273.11	1.29597	1.16084	1.11767	0	1
TKPSTVEVLESIDKEIQALEEFREK	Q9C0E8	N-Term(Dimethyl); K2(Dimethyl); K14(Dimethyl); K25(Dimethyl)	3030.67	0.53001	0.753974	0.703748	0	2
EHPVLALPGAPAQFPVLEEHRPLQK	Q9H488	N-Term(Dimethyl); K25(Dimethyl)	2829.57	1.22242	1.05592	1.15899	0	0
TVCIEKNETLGGTCLNVGCIPSK	P09622	N-Term(Dimethyl); C3(Carbamidomethyl); K6(Dimethyl); C14(Carbamidomethyl); C19(Carbamidomethyl); K23(Dimethyl)	2634.32				0	1
EKLQEEMLQREEAENTLQSFR	P08670	N-Term(Dimethyl); K2(Dimethyl)	2664.32	0.806839	1.01934	0.938529	0	2
ATLPVFDKEELLECIQQLVK	P54687	N-Term(Dimethyl); K8(Dimethyl); C14(Carbamidomethyl); K20(Dimethyl)	2457.36				0	1
GQCDLELINVCNENSLFK	Q00610	N-Term(Dimethyl); C3(Carbamidomethyl); C11(Carbamidomethyl); K18(Dimethyl)	2209.05				0	0
TAFDEAIAELDTLSEESYK	P63104	N-Term(Dimethyl); K19(Dimethyl)	2188.05	0.866664	1.11755	0.776375	0	0
TNLYWPGTAEPLLVSSPEHPKR	P51688	N-Term(Dimethyl); K21(Dimethyl)	2548.35	0.562717	1.00766	0.559068	0	1
DHASIQMNVAEVDKVTGR	Q8WVC2	N-Term(Dimethyl); K14(Dimethyl)	2026.02				0	1
HSAPGLLSMANSGPSTNGCQFFITCSK	C9JQD4	N-Term(Dimethyl); N17(Deamidated); C19(Carbamidomethyl); C25(Carbamidomethyl); K27(Dimethyl)	2926.35	0.681446	0.719257	0.948497	0	0
EGPYDVVVLPGGNLGAQNLSESAAVK	Q99497	N-Term(Dimethyl); K26(Dimethyl)	2640.39	0.7434	0.783582	0.949789	0	0
NVLSDSRPAMAPGSSHLGAPASTTTAADATPSGSLAR	Q9BR76	N-Term(Dimethyl)	3550.74	1.2676	1.29696	0.978463	0	0
ALPAVQQNNLDEDLIRK	P22314	N-Term(Dimethyl); K17(Dimethyl)	1993.1	0.547011	0.977384	0.921809	0	1
HLQTYGEHYPLDHFDK	P12694	N-Term(Dimethyl); K16(Dimethyl)	2055.99				0	0
EDKVPGPLEIPSGMEDAGPGADIIGVNGQGPNLEGK	P48681	N-Term(Dimethyl); K3(Dimethyl); K36(Dimethyl)	3641.84				0	1
RWLLLCNPGLAELIAEK	P06737	N-Term(Dimethyl); C6(Carbamidomethyl); K17(Dimethyl)	2052.16	0.773028	0.672238	1.15123	0	1
AAFGQGSGPIMLDEVQCTGTEASLADCK	Q08380	N-Term(Dimethyl); C17(Carbamidomethyl); C27(Carbamidomethyl); K28(Dimethyl)	2969.36				0	0
AGTQIENIDEDFRDGLK	O43707	N-Term(Dimethyl); K17(Dimethyl)	1976.98			1.02398	0	1
YFTQGNCVNLTEALSLYEEQLGR	P52788	N-Term(Dimethyl); C7(Carbamidomethyl)	2733.31				0	0
MNLSEEVDLEDYVARPDK	P43686	N-Term(Dimethyl); K18(Dimethyl)	2179.05	1.40215	1.02115	1.37465	0	0
TDLEKDIISDTSGDFRK	P07355	N-Term(Dimethyl); K5(Dimethyl); K17(Dimethyl)	2024.05	2.55464	1.16771	2.19019	0	2
VISGVLQLGNIVFKK	P35579	N-Term(Dimethyl); K14(Dimethyl); K15(Dimethyl)	1699.09	1.04487	1.03642	1.0093	0	1
AVCVLKGDGPVQGIINFEQK	P00441	N-Term(Dimethyl); C3(Carbamidomethyl); K6(Dimethyl); Q12(Deamidated); K20(Dimethyl)	2257.24				0	1
AGLPCQDLEFVQFHPTGIYGAGCLITEGCR	P31040	N-Term(Dimethyl); C5(Carbamidomethyl); Q6(Deamidated); Q12(Deamidated); C23(Carbamidomethyl); C29(Carbamidomethyl)	3396.6				0	0
TMLELLNQLDGFQPNTQVK	E9PM69	N-Term(Dimethyl); K19(Dimethyl)	2245.2	1.40991	1.03853	1.35914	0	0
LIDWGLAEFYHPAQEYNVR	P19784	N-Term(Dimethyl)	2349.16	1.1774	0.999158	1.17972	0	0
LATGSDDNCAAFFEGPPFK	O75083	N-Term(Dimethyl); C9(Carbamidomethyl); K19(Dimethyl)	2099.97				0	0
QDKHYGYNSYSVSNSEKDIMAEIYK	P07858	N-Term(Dimethyl); K3(Dimethyl); K17(Dimethyl); K25(Dimethyl)	3081.47	0.328202	0.745644	0.440655	0	2
ACANPAAGSVILLENLR	P00558	N-Term(Dimethyl); C2(Carbamidomethyl)	1796.96	0.480417	0.637168	0.754838	0	0
LIALSIDSVEDHLAWSK	P30041	N-Term(Dimethyl); K17(Dimethyl)	1953.06	1.36929	0.950387	1.84325	0	0
QNCFDDFQCAAEYLIK	P48147	N-Term(Dimethyl); C3(Carbamidomethyl); C9(Carbamidomethyl); K16(Dimethyl)	2077.93	0.982244	0.717874	1.36981	0	0
NMDPLNDNIATLLHQSSDK	P35579	N-Term(Dimethyl); K19(Dimethyl)	2182.07	1.12276	1.12317	1.00076	0	0
NFYGGNGIVGAQVPLGAGIALACK	P08559	N-Term(Dimethyl); C23(Carbamidomethyl); K24(Dimethyl)	2403.28				0	0
FNEEHIPDSPFVVPVASPSGDAR	P21333	N-Term(Dimethyl)	2495.21				0	0
TPELNLDQFHDKTPYTIMFGPDK	P27824	N-Term(Dimethyl); K12(Dimethyl); K23(Dimethyl)	2791.39	0.756233	0.81922	0.924153	0	1
YAVWFGGSMLASTPEFYQVCHTK	P61158	N-Term(Dimethyl); C20(Carbamidomethyl); K23(Dimethyl)	2735.29				0	0
VVSQYSSLLSPMSVNAVMK	P50991	N-Term(Dimethyl); K19(Dimethyl)	2096.11	1.11171	1.03866	1.07154	0	0
NQSQGYNQWQQGQFWGQKPWSQHYHQGYY	Q00839	N-Term(Dimethyl); K18(Dimethyl)	3714.66				0	0
VATAQDDITGDGTTSNVLIIGELLK	P40227	N-Term(Dimethyl); N16(Deamidated); K25(Dimethyl)	2601.4				0	0
YDAMALGNHEFDNGVEGLIEPLLK	P21589	N-Term(Dimethyl); N13(Deamidated); K24(Dimethyl)	2702.33	0.421216	0.834169	0.383378	0	0
SDKLPEEMGLLQGSSGDKR	P43121	N-Term(Dimethyl); K3(Dimethyl); K18(Dimethyl)	2131.1			0.58486	0	2
TVVSGLVQFVPKEELQDR	P54577	N-Term(Dimethyl); K12(Dimethyl)	2100.16	1.14313	1.10113	1.03931	0	1
LTTLADLFRPPIDLMHK	O94888	N-Term(Dimethyl); K17(Dimethyl)	2037.15				0	0
NIILEEGKEILVGDVGQTVDDPYATFVK	G3V1A4	N-Term(Dimethyl); K8(Dimethyl); Q17(Deamidated); K28(Dimethyl)	3147.68				0	1
NTPVYVSSPTWENHNAVFSAAGFK	P17174	N-Term(Dimethyl); K24(Dimethyl)	2679.31	0.551312	0.578817	0.953553	0	0
ENALVQMADANQAQLAMNHLSGQR	O95758	N-Term(Dimethyl)	2638.28				0	0
NIIQQAIDAGEVPSYNAFVK	Q8WXX5	N-Term(Dimethyl); K20(Dimethyl)	2233.19	1.1212	0.990994	1.13266	0	0
GVSSQETAGIGASAHLVNFK	P43490	N-Term(Dimethyl); K20(Dimethyl)	2029.07	0.453686	0.560834	0.809859	0	0
LFQLMVEHTPDEESIDWTK	Q12907	N-Term(Dimethyl); K19(Dimethyl)	2374.16	1.16878	1.15303	1.0148	0	0
TEFLSFMNTELAAFTK	P31949	N-Term(Dimethyl); K16(Dimethyl)	1905.96	0.504231	0.779758	0.647379	0	0
ENNAVYAFLGLTAPPGSK	O75368	N-Term(Dimethyl); K18(Dimethyl)	1905.01	0.452251	0.530897	0.85282	0	0
YGDGGSTFQSTTGHCVHMR	P31943	N-Term(Dimethyl); C15(Carbamidomethyl)	2125.91	1.20448	1.09109	1.10517	0	0
VIEINPYLLGTMSGCAADCQYWER	P28062	N-Term(Dimethyl); C15(Carbamidomethyl); C19(Carbamidomethyl)	2874.31	0.9511	1.24279	0.766154	0	0
EYYSEADASHCIQQILESVNHCHLNGIVHR	D6R938	N-Term(Dimethyl); C11(Carbamidomethyl); Q13(Deamidated); Q14(Deamidated); C22(Carbamidomethyl); N25(Deamidated)	3610.66	0.969564	1.00134	0.969362	0	0
CLELFTELAEDKENYKK	P07900	N-Term(Dimethyl); C1(Carbamidomethyl); K12(Dimethyl); K16(Dimethyl); K17(Dimethyl)	2242.16				0	2
EAEAAIYHLQLFEELR	P14618	N-Term(Dimethyl)	1960.01	0.427382	0.554519	0.794814	0	0
LVGQGASAVLLDLPNSGGEAQAK	Q99714	N-Term(Dimethyl); K23(Dimethyl)	2251.23	1.00972	1.08458	0.932033	0	0
LVQIEYALAAVAGGAPSVGIK	P25787	N-Term(Dimethyl); K21(Dimethyl)	2083.2				0	0
ELAQQVQQVAAEYCR	J3KTA4	N-Term(Dimethyl); C14(Carbamidomethyl)	1820.89	1.24007	1.04712	1.18561	0	0
TPIGSFLGSLSLLPATK	P24752	N-Term(Dimethyl); K17(Dimethyl)	1758.03	1.08482	1.08111	1.00456	0	0
GIFPVLCKDPVQEAWAEDVDLR	P14618;H3BR70	N-Term(Dimethyl); C7(Carbamidomethyl); K8(Dimethyl)	2613.33				0	1
SFLEEVLASGLHSR	Q9NRW7	N-Term(Dimethyl)	1572.83				0	0
MQEVVANLQYDDGSGMKR	Q16531	N-Term(Dimethyl); K17(Dimethyl)	2097	1.00885	1.0257	0.985142	0	1
TLAQLNPESSLFIIASK	P06744	N-Term(Dimethyl); K17(Dimethyl)	1888.08	0.474955	0.57147	0.832048	0	0
YAHWVVSQPPDMHLKPLMTELLK	A0A075B780	N-Term(Dimethyl); K15(Dimethyl); K23(Dimethyl)	2817.51	0.745518	0.727691	1.02565	0	0
RVHVTQEDFEMAVAK	P62195	N-Term(Dimethyl); K15(Dimethyl)	1815.94				0	1
AASAGQEPLHNEELAGAGR	Q96HY6	N-Term(Dimethyl)	1905.94	0.873913	1.0454	0.836898	0	0
TSIDAYDNFDNISLAQR	Q00610;K7EJJ5	N-Term(Dimethyl)	1970.94				0	0
MQQQLDEYQELLDIK	P02545	N-Term(Dimethyl); K15(Dimethyl)	1949.98	1.19014	1.10348	1.07975	0	0
ELLTEFGYKGEETPVIVGSALCALEGRDPELGLK	P49411	N-Term(Dimethyl); K9(Dimethyl); C22(Carbamidomethyl); K34(Dimethyl)	3774.96				0	2
AEVAAEFLNDRVPNCNVVPHFNK	Q8TBC4	N-Term(Dimethyl); C15(Carbamidomethyl); K23(Dimethyl)	2696.35	0.97089	0.730155	1.3312	0	1
GHVFEESQVAGTPMFVVK	P13639	N-Term(Dimethyl); K18(Dimethyl)	2018.05				0	0
IVQIPFCGEIDCEDWIKK	P07814	N-Term(Dimethyl); C7(Carbamidomethyl); C12(Carbamidomethyl); K17(Dimethyl); K18(Dimethyl)	2334.18	1.19872	1.01846	1.17832	0	1
QKGADFLVTEVENGGSLGSKK	P14618	N-Term(Dimethyl); K2(Dimethyl); K20(Dimethyl); K21(Dimethyl)	2276.24	0.542253	0.663685	0.817955	0	2
SILNSLSGEELETLKVELEQLK	Q9NRY5	N-Term(Dimethyl); K15(Dimethyl); K22(Dimethyl)	2556.44	0.944927	0.832333	1.13655	0	1
FSGWYDADLSPAGHEEAKR	P18669	N-Term(Dimethyl); K18(Dimethyl)	2192.03	0.702033	0.862364	0.814997	0	1
LQSGAWGCCPFTQAVCCEDHIHCCPAGFTCDTQK	P28799	N-Term(Dimethyl); C8(Carbamidomethyl); C9(Carbamidomethyl); C16(Carbamidomethyl); C17(Carbamidomethyl); C23(Carbamidomethyl); C24(Carbamidomethyl); C30(Carbamidomethyl); K34(Dimethyl)	4114.69				0	0
DKAPVQPQQSPAAAPGGTDEKPSGK	Q13200	N-Term(Dimethyl); K2(Dimethyl); K21(Dimethyl); K25(Dimethyl)	2573.35	1.03176	1.01814	1.01452	0	1
VPLASQGLGPGSTVLLVVDK	A0A096LNZ9	N-Term(Dimethyl); K20(Dimethyl)	2006.18	0.121336	0.6353	0.191206	0	0
YYALCGFGGVLSCGLTHTAVVPLDLVK	F8VVM2	N-Term(Dimethyl); C5(Carbamidomethyl); C13(Carbamidomethyl); K27(Dimethyl)	2966.56	1.91397	1.50235	1.27542	0	0
TREGNDLYHEMIESGVINLK	P06576	N-Term(Dimethyl); K20(Dimethyl)	2374.2	2.10452	2.05092	1.02729	0	1
VDDKVNFHFILFNNVDGHLYELDGR	P09936	N-Term(Dimethyl); K4(Dimethyl)	3032.52	0.383742	0.746967	0.514312	0	1
LQQELDDLLVDLDHQR	P35579	N-Term(Dimethyl)	1978.02	1.15647	0.998729	1.15925	0	0
TKIDCDNLEQYFIQQGGGPDKK	A0A087X2G1	N-Term(Dimethyl); K2(Dimethyl); C5(Carbamidomethyl); K21(Dimethyl); K22(Dimethyl)	2666.34				0	2
TGISHGHTVYVVHDGFEGLAK	P17858	N-Term(Dimethyl); K21(Dimethyl)	2280.18	0.581525	0.759376	0.856744	0	0
EAPAEGEAAEPGSPTAAEGEAASAASSTSSPK	A0A087WZH7	N-Term(Dimethyl); K32(Dimethyl)	2971.36	1.97699	1.91627	1.03285	0	0
APPQTHLPSGASSGTGSASATHGGGSPPGTR	P46379	N-Term(Dimethyl)	2813.35	1.06769	1.08676	0.983561	0	0
LAPITSDPTEATAVGAVEASFK	P14618	N-Term(Dimethyl); K22(Dimethyl)	2231.17	0.665791	0.961608	0.716227	0	0
NLHQSGFSLSGTQVDEGVR	Q14195	N-Term(Dimethyl)	2059.01	0.876486	0.861706	1.0183	0	0
ADIFVDPVLHTACALDIK	Q92896	N-Term(Dimethyl); C13(Carbamidomethyl); K18(Dimethyl)	2054.09	0.857247	0.838546	1.02345	0	0
LFEKPLDSQSIYQLIEISR	P13521	N-Term(Dimethyl); K4(Dimethyl)	2335.28				0	0
QAAPCVLFFDELDSIAK	P55072	N-Term(Dimethyl); C5(Carbamidomethyl); K17(Dimethyl)	1980.01	0.827247	1.05785	0.782889	0	0
TFAGNTPLHLAAGLGYPTLTR	Q00653	N-Term(Dimethyl)	2199.18	1.00727	1.01813	0.990448	0	0
TQLEELEDELQATEDAK	P35579;P35749;P35580	N-Term(Dimethyl); K17(Dimethyl)	2017.98				0	0
LWGDHGQEALESAHVCLINATATGTEILK	Q13564	N-Term(Dimethyl); C16(Carbamidomethyl); K29(Dimethyl)	3190.62				0	0
TSFTPVGDVFELNFMNVK	P04844	N-Term(Dimethyl); K18(Dimethyl)	2101.06	1.12483	1.12878	0.997626	0	0
QVQSLTCEVDALK	P08670	N-Term(Dimethyl); C7(Carbamidomethyl); K13(Dimethyl)	1546.82	0.659302	1.06796	1.15074	0	0
LPIPESQVITINPELPVEEAAEDYAK	O95336	N-Term(Dimethyl); K26(Dimethyl)	2921.53	0.565584	0.868957	0.65161	0	0
TPCSSLLPLLNAHAATSGK	Q9NUQ6	N-Term(Dimethyl); C3(Carbamidomethyl); K19(Dimethyl)	1994.07	0.99643	1.15188	1.19132	0	0
EGYGLSWNPNLSGHLLSASDDHTICLWDISAVPK	Q09028	N-Term(Dimethyl); C25(Carbamidomethyl); K34(Dimethyl)	3808.85	0.922111	0.754701	1.2232	0	0
TLDGGLNVIQLETAVGAAIK	A0A087WYS1	N-Term(Dimethyl); K20(Dimethyl)	2039.17				0	0
FVQLINTVLNGDQHFMSALDK	Q13617	N-Term(Dimethyl); K21(Dimethyl)	2446.28				0	0
RVIISAPSADAPMFVMGVNHEK	P04406	N-Term(Dimethyl); K22(Dimethyl)	2425.27	0.269186	0.630557	0.427383	0	1
VVQGDIGEANEDVTQIVEILHSGPSK	Q86XP3	N-Term(Dimethyl); K26(Dimethyl)	2790.45	0.988293	0.921412	1.07379	0	0
GYHQYAYDGKDYIALK	P01892	N-Term(Dimethyl); K10(Dimethyl); K16(Dimethyl)	1989.01	0.335157	0.671673	0.487363	0	1
GTVLLADNVICPGAPDFLAHVR	P21964	N-Term(Dimethyl); C11(Carbamidomethyl)	2363.25	0.865684	1.04746	0.827388	0	0
AMHQAQTMEGCSSPMVVK	Q92879	N-Term(Dimethyl); C11(Carbamidomethyl); K18(Dimethyl)	2047.94				0	0
VEFATLQEALAHALTEK	A0A087WY61	N-Term(Dimethyl); K17(Dimethyl)	1927.05				0	0
GSMAGSTGVHDTVVNQLLSK	I3L0N3	N-Term(Dimethyl); K20(Dimethyl)	2057.07				0	0
NEEVLAVLGHELGHWK	O75844	N-Term(Dimethyl); K16(Dimethyl)	1887.01				0	0
GWDQGLLGMCEGEKR	P26885	N-Term(Dimethyl); C10(Carbamidomethyl); K14(Dimethyl)	1791.84	1.17179	1.15	1.02009	0	1
GAVEAAHQAFPGWAGQSPGAR	Q8IZ83	N-Term(Dimethyl)	2093.03				0	0
GAQVNAVNQNGCTPLHYAASK	B1AJY7	N-Term(Dimethyl); C12(Carbamidomethyl); K21(Dimethyl)	2256.11	0.752447	1.03663	0.726676	0	0
YVYKPVMNQTCCPQYTIR	Q5SQQ1	N-Term(Dimethyl); K4(Dimethyl); C11(Carbamidomethyl); C12(Carbamidomethyl)	2377.14	0.926864	0.914459	1.01471	0	0
LTESPCALVASQYGWSGNMER	P14625	N-Term(Dimethyl); C6(Carbamidomethyl)	2384.09	0.74181	0.973415	0.762928	0	0
AALAEITEMVAQLHGTMIK	Q9Y4F1	N-Term(Dimethyl); K19(Dimethyl)	2083.12	0.643041	0.852136	0.755472	0	0
SVGMIAGGTGITPMLQVIR	P00387	N-Term(Dimethyl)	1929.06	1.02246	1.06952	0.957071	0	0
MCLAADVPLIESGTAGYLGQVTTIKK	Q9UBT2	N-Term(Dimethyl); C2(Carbamidomethyl); K25(Dimethyl); K26(Dimethyl)	2820.51	0.872073	1.07187	0.814517	0	1
HVEDGNVTVQHAALSALR	P52306	N-Term(Dimethyl)	1945.02				0	0
GNDISSGTVLSDYVGSGPPK	P30086	N-Term(Dimethyl); K20(Dimethyl)	2006	0.572154	0.708285	0.800537	0	0
VHNDAQSFDYDHDAFLGAEEAK	O43852	N-Term(Dimethyl); K22(Dimethyl)	2535.14		1.00351		0	0
SNELGDVGVHCVLQGLQTPSCK	P13489	N-Term(Dimethyl); C11(Carbamidomethyl); C21(Carbamidomethyl); K22(Dimethyl)	2454.2	0.759962	0.863552	0.881033	0	0
LQEDKEQMAQQLAEETQGFQR	Q15149	N-Term(Dimethyl); K5(Dimethyl)	2563.23	0.987357	1.0292	0.960427	0	1
GIGIENIHYLNDGLWHMK	Q9ULC4	N-Term(Dimethyl); K18(Dimethyl)	2166.11	0.724164	0.747207	0.970253	0	0
MIQDGKGDVTITNDGATILK	P50991	N-Term(Dimethyl); K6(Dimethyl); K20(Dimethyl)	2174.17	0.946597	0.889537	1.06534	0	1
IMRPDDANVAGNVHGGTILK	O00154	N-Term(Dimethyl); K20(Dimethyl)	2134.13				0	0
ELVVNCCTEFIHLISSEANEICNK	Q01658	N-Term(Dimethyl); C6(Carbamidomethyl); C7(Carbamidomethyl); C22(Carbamidomethyl); K24(Dimethyl)	2935.39				0	0
TSHVENDYIDNPSLALTTGPK	Q9C004	N-Term(Dimethyl); K21(Dimethyl)	2328.17	0.646046			0	0
AGVAAPATQVAQVTLQSVQR	Q15149	N-Term(Dimethyl)	2023.13	1.27977	1.1663	1.09853	0	0
NEDEDSPNKLYTLVTYVPVTTFK	H7C2W9	N-Term(Dimethyl); K9(Dimethyl); K23(Dimethyl)	2757.42	0.683391	0.819135	0.835224	0	1
IYFGSNIPNMFVDSSCALK	O75477	N-Term(Dimethyl); C16(Carbamidomethyl); K19(Dimethyl)	2219.08				0	0
FFNANQWADIFQASGAK	Q9BTY2	N-Term(Dimethyl); K17(Dimethyl)	1970.97	0.505561	0.675485	0.749284	0	0
NEEDAAELVALAQAVNAR	P22314	N-Term(Dimethyl)	1911.97	1.14997	1.213	0.97101	0	0
HILGFDTGDAVLNEAAQILR	Q9Y224	N-Term(Dimethyl)	2181.16	1.27294	1.17515	1.08444	0	0
LIPEMDQIFTEVEMTTLEK	A0A087X054	N-Term(Dimethyl); K19(Dimethyl)	2323.18	0.878686	0.951212	0.924795	0	0
VTDPVGDIVSFMHSFEEK	Q96CS3	N-Term(Dimethyl); K18(Dimethyl)	2093.02	0.924625	1.0381	0.891696	0	0
VLQLYQITQINHGLMMVGPSGSGK	Q14204	N-Term(Dimethyl); K24(Dimethyl)	2627.39	1.1288	0.76156	1.48389	0	0
IHEGCEEPATHNALAK	Q00610	N-Term(Dimethyl); C5(Carbamidomethyl); K16(Dimethyl)	1832.89	0.980201	1.15294	0.735075	0	0
IVEAAENEYQTAISENYQTMSDTTFK	P47755	N-Term(Dimethyl); K26(Dimethyl)	3039.41				0	0
FQHPSTMHILQPMDIHVELAK	Q709C8	N-Term(Dimethyl); K21(Dimethyl)	2528.31				0	0
VDEFPLCGHMVSDEYEQLSSEALEAAR	X1WI28	N-Term(Dimethyl); C7(Carbamidomethyl); Q17(Deamidated)	3111.4				0	0
WKPPMIDNPSYQGIWKPR	P27824	N-Term(Dimethyl); K2(Dimethyl); K16(Dimethyl)	2297.22				0	0
SSGPTSLFAVTVAPPGAR	Q00839	N-Term(Dimethyl)	1742.94	1.02653	0.987626	1.04056	0	0
EFASHLQQLQDALNELTEEHSK	A0A087WY61	N-Term(Dimethyl); K22(Dimethyl)	2623.29	0.943289	1.17297	0.805094	0	0
EDAQVAAEILEIADTPSGDK	P08133	N-Term(Dimethyl); K20(Dimethyl)	2128.06	0.575464	0.7794	0.739173	0	0
GTVVYGEPITASLGTDGSHYWSK	Q16555	N-Term(Dimethyl); K23(Dimethyl)	2481.22	0.731938	0.784685	0.93383	0	0
GTGGVDTAAVGGVFDVSNADR	P12277	N-Term(Dimethyl)	1992.96	1.58143	1.54729	1.02322	0	0
VELSDVQNPAISITENVLHFK	Q9P035	N-Term(Dimethyl); K21(Dimethyl)	2409.3				0	0
IGDLQAFQGHGAGNLAGLK	F5GZS6	N-Term(Dimethyl); K19(Dimethyl)	1923.04	1.10326	1.27164	0.868562	0	0
VSCLGVTDDGMAVATGSWDSFLK	P62879;P62873	N-Term(Dimethyl); C3(Carbamidomethyl); K23(Dimethyl)	2472.17				0	0
ESVLIISTDPAHNISDAFDQK	A0A087WXS7	N-Term(Dimethyl); K21(Dimethyl)	2356.2				0	0
NETLDATHLAEFHQIEGVVADHGLTLGHLMGVLR	Q9Y285	N-Term(Dimethyl)	3721.9	1.10169	1.06292	1.03764	0	0
ICKPLHELIMQLLEETPEEK	P68402	N-Term(Dimethyl); C2(Carbamidomethyl); K3(Dimethyl); K20(Dimethyl)	2534.36				0	0
TVYFAEEVQCEGNSFHK	P21291	N-Term(Dimethyl); C10(Carbamidomethyl); K17(Dimethyl)	2100.96	0.336498	0.42795	0.787188	0	0
SELHIENLNMEADPGQYR	P35613	N-Term(Dimethyl)	2144	0.926731	1.06504	0.871115	0	0
APWIEQEGPEYWDGETRK	P01892	N-Term(Dimethyl); K18(Dimethyl)	2247.06	0.605998	1.33878	0.323522	0	1
EKAPSIIFIDELDAIGTK	E9PM69	N-Term(Dimethyl); K2(Dimethyl); K18(Dimethyl)	2044.15	1.1873	0.994582	1.19511	0	1
GVAMNPVEHPFGGGNHQHIGKPSTIR	P62917	N-Term(Dimethyl); M4(Oxidation); K21(Dimethyl)	2809.42	1.1414	1.10738	1.03188	0	0
VVSSLQQEIWEEEDLNRK	P48681	N-Term(Dimethyl); K18(Dimethyl)	2258.16				0	1
CSENKLPAELQELPGLSHQYWSAPSDK	P27695	N-Term(Dimethyl); C1(Carbamidomethyl); K5(Dimethyl); K27(Dimethyl)	3168.55	0.893663	0.793708	1.1272	0	1
ASAPSPNAQVACDHCLK	Q14258	N-Term(Dimethyl); C12(Carbamidomethyl); C15(Carbamidomethyl); K17(Dimethyl)	1881.89	0.476765	0.594321	0.803104	0	0
NNQFQALLQYADPVSAQHAK	A6NLN1	N-Term(Dimethyl); K20(Dimethyl)	2299.17				0	0
AIATLMSDEVFHDIAYK	Q9Y6R1	N-Term(Dimethyl); K17(Dimethyl)	1980.01				0	0
AVCMLSNTTAVAEAWAR	Q9BQE3	N-Term(Dimethyl); C3(Carbamidomethyl)	1878.92	1.33291	1.19248	1.11902	0	0
QAWFIENEEQEYVQTVK	P04083	N-Term(Dimethyl); K17(Dimethyl)	2197.07	0.898334	1.40241	0.641284	0	0
LEGVLAEVAQHYQDTLIR	P46940	N-Term(Dimethyl)	2083.11	1.94669	1.81874	1.07156	0	0
IYNSIYIGSQDALIAHYPR	O75533	N-Term(Dimethyl)	2222.15	2.01372			0	0
IIANALSSEPACLAEIEEDKAR	P78527	N-Term(Dimethyl); C12(Carbamidomethyl); K20(Dimethyl)	2456.26	1.60306			0	1
THVTHHPVSDHEATLR	Q29865;Q9TNN7;P18464;Q29963;P30510	N-Term(Dimethyl)	1864.94				0	0
LNEAAAGLNQAATELVQASR	Q9Y490	N-Term(Dimethyl); N9(Deamidated)	2056.08				0	0
GLITGIGYEVMVSGFTQGHQTKPLR	P24821	N-Term(Dimethyl); K22(Dimethyl)	2745.47				0	0
DGNASGTTLLEALDCILPPTRPTDKPLR	P68104	N-Term(Dimethyl); C15(Carbamidomethyl); K25(Dimethyl)	3077.62				0	0
EGICALGGTSELSSEGTQHSYSEEEKYAFVNWINK	P13797	N-Term(Dimethyl); C4(Carbamidomethyl); K26(Dimethyl); K35(Dimethyl)	4004.88	0.61715	0.705731	0.875469	0	1
VMTIPYQPMPASSPVICAGGQDR	Q15365	N-Term(Dimethyl); C17(Carbamidomethyl)	2503.21	0.972834	0.965645	1.00858	0	0
LQVELDNVTGLLSQSDSK	P35579	N-Term(Dimethyl); K18(Dimethyl)	2002.07	1.18406	1.07597	1.1017	0	0
EHGLNPDVVQNIQDICNSK	Q7Z2W4	N-Term(Dimethyl); C16(Carbamidomethyl); K19(Dimethyl)	2236.1				0	0
LLSEIEFLVNHMDLAK	Q9NV70	N-Term(Dimethyl); K16(Dimethyl)	1928.05	1.04656	1.1723	0.893749	0	0
VIDLPGGGAAFVMEHLK	Q9H479	N-Term(Dimethyl); K17(Dimethyl)	1809.99				0	0
GPVTDVAYSHDGAFLAVCDASK	O75083	N-Term(Dimethyl); C18(Carbamidomethyl); K22(Dimethyl)	2336.12	1.56095	1.42262	1.09847	0	0
IKWGDAGAEYVVESTGVFTTMEK	P04406	N-Term(Dimethyl); K2(Dimethyl); M21(Oxidation); K23(Dimethyl)	2618.29				0	1
LQVEPAVDTSGVQCYGPGIEGQGVFR	P21333	N-Term(Dimethyl); C14(Carbamidomethyl)	2791.37	1.71229	1.24743	1.3742	0	0
IYELAAGGTAVGTGLNTR	P07954	N-Term(Dimethyl)	1791.96	1.45011	1.21272	1.1971	0	0
VADGMVFGALLPCEECSGQLVFK	P09874	N-Term(Dimethyl); C13(Carbamidomethyl); C16(Carbamidomethyl); K23(Dimethyl)	2583.26	1.15068	1.00172	1.15	0	0
NNQFQALLQYADPVSAQHAK	A6NLN1	N-Term(Dimethyl); Q9(Deamidated); K20(Dimethyl)	2300.18				0	0
AGVNTVTTLVENKK	P62424	N-Term(Dimethyl); K13(Dimethyl); K14(Dimethyl)	1557.92				0	1
GMGGAFVLVLYDEIKK	P05141;P12235;P12236	N-Term(Dimethyl); K15(Dimethyl); K16(Dimethyl)	1824.03				0	1
QKGADFLVTEVENGGSLGSK	P14618	N-Term(Dimethyl); K2(Dimethyl); K20(Dimethyl)	2120.12			0.840748	0	1
TMLITHMQDLQEVTQDLHYENFR	Q15019	N-Term(Dimethyl)	2890.38				0	0
LLQAQLQAQKEELQSLMHQPK	Q96AQ6	N-Term(Dimethyl); K10(Dimethyl); K21(Dimethyl)	2545.4	0.595691	0.832596	0.716268	0	1
LFAQLAGDDMEVSATELMNILNK	K7EIV0	N-Term(Dimethyl); K23(Dimethyl)	2579.31				0	0
HRPQVAIICGSGLGGLTDK	P00491	N-Term(Dimethyl); C9(Carbamidomethyl); K19(Dimethyl)	2035.11	0.899623	1.00838	0.893153	0	0
RLEDLSESIVNDFAYMK	P49755	N-Term(Dimethyl); K17(Dimethyl)	2086.05	0.890812	0.979274	0.910691	0	1
AVTDSINQLITMCTQQAPGQK	Q9Y490	N-Term(Dimethyl); C13(Carbamidomethyl); K21(Dimethyl)	2360.19				0	0
AGGSASAMLQPLLDNQVGFK	P20618	N-Term(Dimethyl); K20(Dimethyl)	2060.08	0.923266	0.860624	1.07399	0	0
ANLLNNEAHAITMQVTK	P46063	N-Term(Dimethyl); K17(Dimethyl)	1924.03	1.13565	1.30083	0.874005	0	0
AYLESEVAISEELVQK	F8W914	N-Term(Dimethyl); K16(Dimethyl)	1863.99	0.322274	0.263463	1.2246	0	0
TIDGQQTIIACIESHQFQPK	P52907	N-Term(Dimethyl); C11(Carbamidomethyl); K20(Dimethyl)	2370.19				0	0
SDAEEDGGTVSQEEEDRKPK	P27824	N-Term(Dimethyl); K18(Dimethyl); K20(Dimethyl)	2290.06				0	1
LLGHWEEAAHDLALACK	P50502	N-Term(Dimethyl); C16(Carbamidomethyl); K17(Dimethyl)	1990.02	1.16039	1.04544	1.1112	0	0
QVQSLTCEVDALKGTNESLER	P08670	N-Term(Dimethyl); C7(Carbamidomethyl); K13(Dimethyl); N16(Deamidated)	2434.2				0	1
LTPFMLGALVAMYEHK	P06744	N-Term(Dimethyl); K16(Dimethyl)	1877				0	0
LLPCLHSACSACLGPAAPAAANSSGDGGAAGDGTVVDCPVCK	Q13263	N-Term(Dimethyl); C4(Carbamidomethyl); C9(Carbamidomethyl); C12(Carbamidomethyl); C38(Carbamidomethyl); C41(Carbamidomethyl); K42(Dimethyl)	4167.89				0	0
EIGPNDGFLAQLCQLNDR	P51452	N-Term(Dimethyl); C13(Carbamidomethyl)	2088.01	1.24614	0.790437	1.57829	0	0
IGEHTPSALAIMENANVLAR	P04075	N-Term(Dimethyl)	2135.12			1.03413	0	0
EQVPSLGSNVACGLAYTDYHK	A1L0T0	N-Term(Dimethyl); C12(Carbamidomethyl); K21(Dimethyl)	2365.14	0.915778	1.0389	0.88248	0	0
LNRLPAAGVGDMVMATVK	P62829	N-Term(Dimethyl); K18(Dimethyl)	1899.05	0.949394	1.12545	0.844518	0	1
TGENVEDAFLEAAKK	P61106	N-Term(Dimethyl); K14(Dimethyl); K15(Dimethyl)	1705.9	0.737408	1.08931	0.67771	0	1
IVGLDQVTGMTETAFGSAYK	P35580	N-Term(Dimethyl); K20(Dimethyl)	2144.09				0	0
LLGGVTIAQGGVLPNIQAVLLPK	Q8IUE6	N-Term(Dimethyl); K23(Dimethyl)	2327.43				0	0
QLSAQGQMTQLCELINK	Q9UNS2	N-Term(Dimethyl); C12(Carbamidomethyl); K17(Dimethyl)	2018.03				0	0
SLGETQLVLYGDVEELKR	Q07065	N-Term(Dimethyl); K17(Dimethyl)	2105.13				0	1
GKDEAMAIGGHWSPSLDGPDPEKDPSVLIK	Q8IX12	N-Term(Dimethyl); K2(Dimethyl); K23(Dimethyl); K30(Dimethyl)	3258.66	1.07663	1.12628	0.956993	0	2
TLLPHDPTADVFVTPAEEKPIEIQWVKPEPK	Q8TDN6	N-Term(Dimethyl); K19(Dimethyl); K27(Dimethyl); K31(Dimethyl)	3636.96	1.28651	1.15881	1.11145	0	0
DIYYNNMEEVCGGEKPYLSPDILEEK	Q6DD88	N-Term(Dimethyl); C11(Carbamidomethyl); K15(Dimethyl); K26(Dimethyl)	3189.5	0.913843	0.834865	1.09583	0	0
NPQQHLNAQPQVTMQQPAVHVQGQEPLTASMLASAPPQEQK	P11940	N-Term(Dimethyl); K41(Dimethyl)	4513.28	0.829613	1.0109	0.821593	0	0
FVPYLIAGIQHSCQDIGAK	P12268	N-Term(Dimethyl); C13(Carbamidomethyl); K19(Dimethyl)	2173.14				0	0
RKGTDVNVFNTILTTR	P04083	N-Term(Dimethyl); K2(Dimethyl)	1891.07	0.83402	0.898046	0.929751	0	2
GFSLSDVPQAEISGEHLR	P35052	N-Term(Dimethyl)	1969.99			1.46177	0	0
SGTGIAAMSVMRPEQIMK	P27449	N-Term(Dimethyl); K18(Dimethyl)	1963.01	0.80495	2.28607	0.352507	0	0
EKDILVLPLDLTDTGSHEAATK	Q9Y394	N-Term(Dimethyl); K2(Dimethyl); K22(Dimethyl)	2450.33	0.604551	0.922563	0.656032	0	1
TYTAYVDLEKDFAAEVVHPGDLK	P54577	N-Term(Dimethyl); K10(Dimethyl); K23(Dimethyl)	2665.37	0.958835	0.940247	1.02092	0	1
GFGFVTYSCVEEVDAAMCARPHK	P51991	N-Term(Dimethyl); C9(Carbamidomethyl); C18(Carbamidomethyl); K23(Dimethyl)	2687.24	0.354259	0.401724	0.882841	0	0
AASSTSQSGLSNSSHNCSNKPSIGK	Q9BYI3	N-Term(Dimethyl); C17(Carbamidomethyl); K20(Dimethyl); K25(Dimethyl)	2590.24	0.902224	1.26003	0.716842	0	0
QARPTYATAMLQSLLK	A0A0A0MRM8	N-Term(Dimethyl); K16(Dimethyl)	1848.04	0.961501	1.32544	0.726236	0	0
AAELIANSLATAGDGLIELR	P35232	N-Term(Dimethyl)	2026.11	1.45813	1.08882	1.34069	0	0
DNHLLGTFDLTGIPPAPR	P11021	N-Term(Dimethyl)	1962.04	0.771692	0.868842	0.879902	0	0
VAGHPNIVINNAAGNFISPTER	Q16698	N-Term(Dimethyl); N10(Deamidated)	2320.22				0	0
VQASLAANTFTITGHAETK	P20290;D6RDG3	N-Term(Dimethyl); K19(Dimethyl)	2016.07				0	0
EFIGSFLEMFGPEGALK	P49585	N-Term(Dimethyl); K17(Dimethyl)	1927.98	1.51271	1.09335	1.38511	0	0
TIQQCCENILLNAAWLK	E9PLK3	N-Term(Dimethyl); C5(Carbamidomethyl); C6(Carbamidomethyl); K17(Dimethyl)	2131.1				0	0
GVNWAAFHPTMPLIVSGADDR	P53621	N-Term(Dimethyl)	2282.13				0	0
LKDPANFQYPAESVLAYK	B4DLR8	N-Term(Dimethyl); K2(Dimethyl); K18(Dimethyl)	2138.15				0	1
WLPAGDALLQMITIHLPSPVTAQK	P13639	N-Term(Dimethyl); K24(Dimethyl)	2656.48				0	0
SQETECTYFSTPLLLGK	P40926	N-Term(Dimethyl); C6(Carbamidomethyl); K17(Dimethyl)	2030				0	0
MESQLSASKPTGGLPETAR	H3BPE1	N-Term(Dimethyl); K9(Dimethyl)	2016.04	1.92381	1.40226	1.37348	0	0
GRLYPWGVVEVENPEHNDFLK	Q15019	N-Term(Dimethyl); K21(Dimethyl)	2554.3				0	1
GAVLVCDMSSNFLSKPVDVSK	Q9Y617	N-Term(Dimethyl); C6(Carbamidomethyl); K15(Dimethyl); K21(Dimethyl)	2337.2	0.94199	0.955006	0.987482	0	0
SEEPAGQILSHLSSELK	Q9UQ35	N-Term(Dimethyl); K17(Dimethyl)	1880.99	0.894456	0.657777	1.36135	0	0
LAELEEFINGPNNAHIQQVGDR	Q00610	N-Term(Dimethyl); N9(Deamidated)	2493.25				0	0
GATELTHEDYMEGILEVQAK	E9PM69	N-Term(Dimethyl); K20(Dimethyl)	2290.12	0.950985	1.00441	0.947874	0	0
NHGLSDEHVFEVICPSIPGYGFSEASSK	P07099	N-Term(Dimethyl); C14(Carbamidomethyl); K28(Dimethyl)	3119.48				0	0
FAHTNVESLVNEYDDNGEGIILFRPSHLTNK	P30101	N-Term(Dimethyl); N11(Deamidated); N16(Deamidated); K31(Dimethyl)	3587.77				0	0
NTRPQISSLTQSQAETPSGDMHQHEGHIPNAVDSCLQK	Q8TDB6	N-Term(Dimethyl); C35(Carbamidomethyl); K38(Dimethyl)	4255				0	0
SKCEELSGLHGQLQEAR	A0A0A0MRV0	N-Term(Dimethyl); K2(Dimethyl); C3(Carbamidomethyl)	1998			0.93251	0	1
TIIGSFNGALAAVPVQDLGSTVIK	Q9BWD1	N-Term(Dimethyl); K24(Dimethyl)	2427.38				0	0
MMITSQDVLHSWAVPTLGLK	P00403	N-Term(Dimethyl); K20(Dimethyl)	2283.22				0	0
AAFDDAIAELDTLSEESYK	P62258	N-Term(Dimethyl); K19(Dimethyl)	2144.02	0.876587	0.782215	1.12191	0	0
INLAEDVLAWEHER	Q969V3	N-Term(Dimethyl)	1722.88	0.945631	1.05224	0.899692	0	0
QTIGNSCGTIGLIHAVANNQDK	P09936	N-Term(Dimethyl); N5(Deamidated); C7(Carbamidomethyl); K22(Dimethyl)	2368.19				0	0
GITNLCVIGGDGSLTGADTFR	P08237	N-Term(Dimethyl); C6(Carbamidomethyl)	2152.07	0.82299	0.918051	0.897463	0	0
ISVAGVTSSNVGYLAHAIHQVTK	P00505	N-Term(Dimethyl); N10(Deamidated); K23(Dimethyl)	2409.32				0	0
SKVDEAVAVLQAHQAK	P11940	N-Term(Dimethyl); K2(Dimethyl); K16(Dimethyl)	1778.01	0.103139	0.344935	0.682076	0	1
SQIFSTASDNQPTVTIK	P11021	N-Term(Dimethyl); K17(Dimethyl)	1892.99				0	0
RPNVVLLLTDDQDEVLGGMTPLKK	P15586	N-Term(Dimethyl); K23(Dimethyl); K24(Dimethyl)	2735.54				0	1
ETNLDSLPLVDTHSK	P08670	N-Term(Dimethyl); K15(Dimethyl)	1724.9	1.11445	1.13565	0.982444	0	0
DINQEVYNFLATAGAK	Q99798	N-Term(Dimethyl); K16(Dimethyl)	1809.93	1.05889	0.883988	1.1992	0	0
GHSAAVHSFAFSNDSR	E9PF19	N-Term(Dimethyl)	1717.8	0.952665	1.00063	0.925613	0	0
FFTGDVFGYHGYTFANLGEHEFVEEK	Q9UBE0	N-Term(Dimethyl); K26(Dimethyl)	3096.44	0.904691	0.953765	0.949616	0	0
GLGTDEDAIISVLAYR	P09525	N-Term(Dimethyl)	1720.91	0.67189	0.860118	0.78204	0	0
IIGLDQVAGMSETALPGAFK	P35579	N-Term(Dimethyl); K20(Dimethyl)	2074.13	1.17701	1.17142	1.0059	0	0
LTVIDTPGFGDHINNENCWQPIMK	Q9UHD8	N-Term(Dimethyl); C18(Carbamidomethyl); K24(Dimethyl)	2855.37	0.968872	1.07908	0.89888	0	0
LKETIDNNSVSSPLQSLQQR	P60228	N-Term(Dimethyl); K2(Dimethyl)	2313.24	1.07349	1.29769	0.828164	0	1
RPHDYQPLPGMSENPSVYVPGVVSTVVPDSAHK	K7ENG2	N-Term(Dimethyl); K33(Dimethyl)	3615.83				0	0
ISYHGSCPQGLADSAWIPFR	Q9UBG0	N-Term(Dimethyl); C7(Carbamidomethyl)	2290.1				0	0
TFHIFYYLLSGAGEHLK	P35579	N-Term(Dimethyl); K17(Dimethyl)	2052.09	0.575356	0.709406	0.811952	0	0
LKVDELISSAIFHFK	Q13325	N-Term(Dimethyl); K2(Dimethyl); K15(Dimethyl)	1831.07	0.281192	0.680015	0.413975	0	1
HILYGCSELFNATQFIK	Q8WVM8	N-Term(Dimethyl); C6(Carbamidomethyl); K17(Dimethyl)	2097.08	0.181197	0.16635	1.09048	0	0
DLGQPAAAAGHFQR	P23610	N-Term(Dimethyl)	1466.75	1.05937	0.538098	1.97095	0	0
IICILSHPIKNTNDANSCQIIIPQNQVNR	P31150	N-Term(Dimethyl); C3(Carbamidomethyl); K10(Dimethyl); C18(Carbamidomethyl)	3429.8	0.955781	0.923764	1.03583	0	1
IVENSDAVTEILNNAELLK	Q16401	N-Term(Dimethyl); K19(Dimethyl)	2141.16	0.873095	0.947407	0.922601	0	0
LREVVETPLLHPER	P35998	N-Term(Dimethyl)	1715.98	0.983346	1.04998	0.937593	0	1
IHVSDQELQSANASVDDSRLEELK	P22314	N-Term(Dimethyl); K24(Dimethyl)	2739.38	0.751763	0.882924	0.852406	0	1
NTEISFQLGEEFDETTADDRNCK	O15540	N-Term(Dimethyl); C22(Carbamidomethyl); K23(Dimethyl)	2775.24	2.7808	1.1073	2.51417	0	1
GSTAPVGGGAFPTIVER	Q15084	N-Term(Dimethyl)	1643.87	1.0063	0.721529	1.39625	0	0
IDFEDVIAEPEGTHSFDGIWK	Q03135	N-Term(Dimethyl); K21(Dimethyl)	2461.18	0.767268	1.07346	0.715564	0	0
VEAEGLAALHSLTACLSR	Q96T76	N-Term(Dimethyl); C15(Carbamidomethyl)	1926.01	1.04065	1.06552	0.977756	0	0
SGSKFPVFNMSYNPAENAVLLCTR	P53621	N-Term(Dimethyl); K4(Dimethyl); C22(Carbamidomethyl)	2758.36				0	1
ECNMGNLICDAMINNNLR	P21589	N-Term(Dimethyl); C2(Carbamidomethyl); C9(Carbamidomethyl)	2179.96	0.38703	0.807105	0.480069	0	0
MVMIQDGPQNTGADKPLR	Q96AE4	N-Term(Dimethyl); K15(Dimethyl)	2027.04	0.919815	0.949485	0.969843	0	0
EIVYPNIEETHWLSNLESTHWLEHIK	C9JEX3	N-Term(Dimethyl); K26(Dimethyl)	3273.65	1.01542	1.02803	0.988846	0	0
NYGSYSTQASAAAATAELLK	O14828	N-Term(Dimethyl); K20(Dimethyl)	2073.05				0	0
TALHLATEMEELGLVTHLVTK	Q00653	N-Term(Dimethyl); K21(Dimethyl)	2362.29				0	0
FSGWYDADLSPAGHEEAK	P18669	N-Term(Dimethyl); K18(Dimethyl)	2035.93	0.423498	0.630148	0.672819	0	0
HVIQTLSQEFALSQHPHSR	Q08AM6	N-Term(Dimethyl)	2243.17	0.0261357	0.0491978	0.531835	0	0
HTGCCGDNDPIDVCEIGSK	Q15181	N-Term(Dimethyl); C4(Carbamidomethyl); C5(Carbamidomethyl); C14(Carbamidomethyl); K19(Dimethyl)	2189.92	0.959711	1.04437	0.919977	0	0
AYHPGCFTCVVCHR	Q15654	N-Term(Dimethyl); C6(Carbamidomethyl); C9(Carbamidomethyl); C12(Carbamidomethyl)	1791.78	0.989393	1.02619	0.965226	0	0
HYLDFINHYANLFHEK	Q14204	N-Term(Dimethyl); K16(Dimethyl)	2117.06				0	0
SITVNDLTHLLEAAEK	Q8IVG5	N-Term(Dimethyl); K16(Dimethyl)	1809.99	0.251308	0.725267	0.346894	0	0
GSIVWQEVFDDKAK	P07686	N-Term(Dimethyl); K12(Dimethyl); K14(Dimethyl)	1705.91				0	1
LGAVFNQVAFPLQYTPR	Q15393	N-Term(Dimethyl)	1949.06				0	0
LGGIVLPNDGQCHLENNMYTMSHYYDYPSIAHLVQK	P05556	N-Term(Dimethyl); C12(Carbamidomethyl); K36(Dimethyl)	4234	1.02046	0.948262	1.07735	0	0
GYIWNYGAIPQTWEDPGHNDK	Q15181	N-Term(Dimethyl); K21(Dimethyl)	2517.18	0.77792	0.889432	0.875611	0	0
DVVICPDASLEDAKK	Q99497	N-Term(Dimethyl); C5(Carbamidomethyl); K14(Dimethyl); K15(Dimethyl)	1743.91				0	1
SSQTSGTNEQSSAIVSAR	O60763	N-Term(Dimethyl)	1837.88	1.04066	1.05743	0.985243	0	0
TDMIQALGGVEGILEHTLFK	Q6P2Q9	N-Term(Dimethyl); K20(Dimethyl)	2228.19	0.962343	0.917746	1.04978	0	0
NATNVEQAFMTMAAEIKK	Q9H0U4	N-Term(Dimethyl); K17(Dimethyl); K18(Dimethyl)	2081.07				0	1
GQQEIQDQLSLSEALQR	P20591	N-Term(Dimethyl)	1971.01	0.206312			0	0
HTTSIFDDFAHYEK	A0A024R7W5;Q9BYJ9	N-Term(Dimethyl); K14(Dimethyl)	1766.84				0	0
DELHIVEAEAMNYEGSPIK	P06748	N-Term(Dimethyl); K19(Dimethyl)	2201.07	0.887042	1.01708	1.08129	0	0
LVVEEYYEVLDHCSSILNK	O00170	N-Term(Dimethyl); C13(Carbamidomethyl); K19(Dimethyl)	2366.19	0.684624	0.70217	0.976111	0	0
LAQENEVDFILLGGDLFHENKPSR	F8W7U8	N-Term(Dimethyl); K21(Dimethyl)	2797.45				0	0
HNQLPLVIEFTEQTAPK	P07237	N-Term(Dimethyl); K17(Dimethyl)	2021.1				0	0
VNQWTTNVVEQTLSQLTK	P63172	N-Term(Dimethyl); K18(Dimethyl)	2145.16		0.653412		0	0
ETIELVHTEPTDVAQLPSR	Q6IBS0	N-Term(Dimethyl)	2163.12				0	0
VSNGAGTMSVSLVADENPFAQGALK	A0A0A0MS51	N-Term(Dimethyl); N3(Deamidated); K25(Dimethyl)	2520.25	0.526199	0.608397	0.865869	0	0
NLVDFTFVENVVHGHILAAEQLSR	Q15738	N-Term(Dimethyl)	2736.44	1.54548	1.16952	1.32295	0	0
ADPAAASHPLLLNGDATVAQK	P20591	N-Term(Dimethyl); N13(Deamidated); K21(Dimethyl)	2117.12		1.20946		0	0
TSTSNVEQYQAMVTSLEESLNK	P12270	N-Term(Dimethyl); K22(Dimethyl)	2515.21				0	0
VRAPMVNPTLGVHEADLLK	Q13423	N-Term(Dimethyl); K19(Dimethyl)	2116.19	1.09766	1.01964	1.07774	0	1
IRIDSLSAQLSQLQK	P02545	N-Term(Dimethyl); K15(Dimethyl)	1756.03	1.28622	1.13346	1.13605	0	1
YRCELLYEGPPDDEAAMGIK	P13639	N-Term(Dimethyl); C3(Carbamidomethyl); K20(Dimethyl)	2383.12				0	1
SYGPAPGAGHVQEESNLSLQALESR	Q13155	N-Term(Dimethyl)	2625.28	0.307563	0.328924	0.936112	0	0
EVGSHFDDFVTNLIEK	B1APM4	N-Term(Dimethyl); K16(Dimethyl)	1905.95	1.41089	1.18273	1.19425	0	0
GIDIHGVPYVINVTLPDEK	A0A087X2G1	N-Term(Dimethyl); K19(Dimethyl)	2135.16	0.816165	0.778727	1.04926	0	0
LAGSLLTQALESHAEGFR	Q13724	N-Term(Dimethyl)	1928.02	0.822705	1.04726	0.786463	0	0
YLPELMAEKDSLDPSFTHALR	O75525	N-Term(Dimethyl); K9(Dimethyl)	2489.27				0	1
YHEQLSTQSLIELFESFK	Q00610	N-Term(Dimethyl); K18(Dimethyl)	2255.15	0.983264	0.844645	1.16543	0	0
VIMGEEVEPVGLMTGSGVVGVK	F8VPD4	N-Term(Dimethyl); K22(Dimethyl)	2243.2	1.09956	1.15231	0.955296	0	0
AGLGSGLSLSGLVHPELSR	P49748	N-Term(Dimethyl)	1878.04				0	0
RSYDVPPPPMEPDHPFYSNISK	P18669	N-Term(Dimethyl); K22(Dimethyl)	2629.27	0.664194	0.639469	0.837373	0	1
FTLDCTHPVEDGIMDAANFEQFLQER	P35268	N-Term(Dimethyl); C5(Carbamidomethyl); N18(Deamidated); Q21(Deamidated)	3113.42				0	0
YQLTLWGPEGNILDYANK	P54802	N-Term(Dimethyl); K18(Dimethyl)	2151.12	0.299466	0.389933	0.768857	0	0
LATTACTLGDGEAVGADSGTSSAVSLK	E9PHI4	N-Term(Dimethyl); C6(Carbamidomethyl); K27(Dimethyl)	2595.27				0	0
ILSLICNSSSEKPTVQQLQILWK	Q9Y263	N-Term(Dimethyl); C6(Carbamidomethyl); K12(Dimethyl); K23(Dimethyl)	2769.55	0.909488	0.865096	1.0525	0	0
QLIMSPLITSHVIGENEPLTSVLNK	Q9H7D0	N-Term(Dimethyl); K25(Dimethyl)	2789.56	1.29538			0	0
AAAQLLQSQAQQSGAQQTK	D6RGI3	N-Term(Dimethyl); K19(Dimethyl)	2013.07	1.03449	0.984487	1.05197	0	0
FVVDLSDQVAPTDIEEGMR	P35998	N-Term(Dimethyl)	2149.04	1.14512	1.06856	1.07286	0	0
QQVHVELDVAKPDLTAALK	P14136	N-Term(Dimethyl); K11(Dimethyl); K19(Dimethyl)	2159.24	0.610205	0.639305	0.955557	0	0
STAISLFYELSENDLNFIK	P13639	N-Term(Dimethyl); K19(Dimethyl)	2260.17				0	0
NPYYGGESASITPLEDLYKR	P50395	N-Term(Dimethyl); K19(Dimethyl)	2329.16	0.954071	0.957046	0.998015	0	1
APKPEDIDEEDDDVPDLVENFDEASKNEAN	Q96K17	N-Term(Dimethyl); K3(Dimethyl); K26(Dimethyl)	3443.54				0	1
LTSTATKDPEGFVGHPVNAFK	P13674	N-Term(Dimethyl); K7(Dimethyl); K21(Dimethyl)	2300.22	0.72605	0.901954	0.805881	0	1
QLQEELAEHQVPVEK	H3BPE1	N-Term(Dimethyl); K15(Dimethyl)	1832.97	2.51211	1.45999	1.72258	0	0
GLLGLPEEETELDNLTEFNTAHNKR	Q12972	N-Term(Dimethyl); K24(Dimethyl)	2896.45				0	1
EVSDGIIAPGYEEEALTILSK	P31939	N-Term(Dimethyl); K21(Dimethyl)	2290.2	0.784388	0.837646	0.937474	0	0
TSSAQVEGGVHSLHSYEK	P12268	N-Term(Dimethyl); K18(Dimethyl)	1971.97	1.25104	1.11818	1.10935	0	0
GFAFVTFDDHDSVDKIVIQK	F8W6I7	N-Term(Dimethyl); K15(Dimethyl); K20(Dimethyl)	2365.24			1.20515	0	1
EYFGAFGEIENIELPMDTK	A0A087WUK2	N-Term(Dimethyl); K19(Dimethyl)	2259.08				0	0
ALAAAGYDVEKNNSR	P10412	N-Term(Dimethyl); K11(Dimethyl)	1634.85	1.40825	1.18851	1.18622	0	1
SFCSMAGPNLIAIGSSESAQK	O94760	N-Term(Dimethyl); C3(Carbamidomethyl); K21(Dimethyl)	2211.08	0.942572	0.981992	0.960939	0	0
QREEYQPATPGLGMFVEVKDPEDK	Q9BVK6	N-Term(Dimethyl); K19(Dimethyl); K24(Dimethyl)	2847.42	0.778033	0.908052	0.857781	0	2
VGRPSNIGQAQPIIDQLAEEAR	Q9UHX1;E9PQ56	N-Term(Dimethyl)	2390.27				0	0
AAGIDEQENWHEGKENIR	P28838	N-Term(Dimethyl); K14(Dimethyl)	2152.03	0.581649	0.855051	0.681017	0	1
VSQMAQYFEPLTLAAVGAASK	Q9Y490	N-Term(Dimethyl); K21(Dimethyl)	2238.18	1.09655	1.02618	1.06978	0	0
GTMTTGHNVADLVVILK	B4DY09	N-Term(Dimethyl); K17(Dimethyl)	1825.02				0	0
SSSSSSASAAAAAAAASSSASCSR	Q07065	N-Term(Dimethyl); C22(Carbamidomethyl)	2117.94	0.858886	0.817024	1.05242	0	0
LPTGYYFGASAGTGDLSDNHDIISMK	Q12907	N-Term(Dimethyl); K26(Dimethyl)	2786.32				0	0
ALIERPSQNNIGIQTMECSLR	A6NNK5	N-Term(Dimethyl); C18(Carbamidomethyl)	2458.25				0	0
YISELAITTRPHQIIMPSAIER	Q93008	N-Term(Dimethyl)	2567.4	1.36598	1.12369	1.21699	0	0
NHGVVMPDANKENTLNQLVGAAFGAAGQR	Q02252	N-Term(Dimethyl); K11(Dimethyl)	3035.54				0	1
GFLWDEGFHQLVVQR	Q13724	N-Term(Dimethyl)	1858.95	0.856737	0.948613	0.904164	0	0
VVVHPLVLLSVVDHFNR	P51665	N-Term(Dimethyl)	1971.15				0	0
NLEAVETLGSTSTICSDK	P05023	N-Term(Dimethyl); C15(Carbamidomethyl); K18(Dimethyl)	1980.97				0	0
VIISAPSADAPMFVMGVNHEKYDNSLK	P04406	N-Term(Dimethyl); N18(Deamidated); K21(Dimethyl); K27(Dimethyl)	3018.52	0.707423	0.935051	0.757121	0	1
QSSGPSSSPAAAAAPEKPGPK	Q9UDT6	N-Term(Dimethyl); K17(Dimethyl); K21(Dimethyl)	2006.05				0	0
NKETLGSEAVSSNVIDYGHASK	Q14966	N-Term(Dimethyl); K2(Dimethyl); K22(Dimethyl)	2390.21	1.10391	0.857	1.28957	0	1
FGHEFLEFEFRPDGK	P61326	N-Term(Dimethyl); K15(Dimethyl)	1910.94	0.912628	0.933082	0.997249	0	0
NALKQETEVELYNEFPEPIKLDK	P51149	N-Term(Dimethyl); K4(Dimethyl); K20(Dimethyl); K23(Dimethyl)	2859.53	0.801054	0.917708	0.873868	0	2
LNSNTQVVLLSATMPSDVLEVTKK	P60842	N-Term(Dimethyl); K23(Dimethyl); K24(Dimethyl)	2671.49	1.50441	1.0524	1.43111	0	1
SLIANLAAANCYKK	P55263	N-Term(Dimethyl); C11(Carbamidomethyl); K13(Dimethyl); K14(Dimethyl)	1620.91	0.748435	1.12269	0.667397	0	1
MTATGSGENSTVAEHLIAQHSAIK	E7EM64	N-Term(Dimethyl); K24(Dimethyl)	2509.26	1.04974	1.00646	1.04418	0	0
FAKPVYPGQTLQTEMWK	P51659	N-Term(Dimethyl); K3(Dimethyl); K17(Dimethyl)	2108.12				0	0
DIENQYETQITQIEHEVSSSGQEVQSSAK	P35527	N-Term(Dimethyl); Q5(Deamidated); K29(Dimethyl)	3321.56				0	0
TFQLQLLSPSSSIVPAFNTGTITQVIK	O43747	N-Term(Dimethyl); K27(Dimethyl)	2946.66	0.740919	0.90257	0.821824	0	0
GDGAELIWDKDDPSAMDFVTSAANLR	Q9UBT2	N-Term(Dimethyl); K10(Dimethyl)	2850.35	1.41263	1.38301	1.02257	0	1
EIFLSQPILLELEAPLK	P62140;F8VYE8;P62136	N-Term(Dimethyl); K17(Dimethyl)	2009.19				0	0
GGSCSQAASSNSAQGSDESLIACK	Q29865;Q9TNN7;Q29963;P30510	N-Term(Dimethyl); C4(Carbamidomethyl); C23(Carbamidomethyl); K24(Dimethyl)	2428.06				0	0
ICDPGLTSFEPEALGNLVEGMDFHK	Q5SWX3	N-Term(Dimethyl); C2(Carbamidomethyl); K25(Dimethyl)	2832.35	0.666028	0.926843	0.719409	0	0
AYVKDHYSNGFCTVYAK	P52907	N-Term(Dimethyl); K4(Dimethyl); N9(Deamidated); C12(Carbamidomethyl); K17(Dimethyl)	2108				0	1
LGKPSAHASQSFCESSSETPFHFTLPK	A6NNK5	N-Term(Dimethyl); K3(Dimethyl); C13(Carbamidomethyl); K27(Dimethyl)	3061.51	0.703601	0.726129	0.970067	0	0
VTDFGDKVEDPTFLNQLQSGVNR	Q14204	N-Term(Dimethyl); K7(Dimethyl)	2635.34	1.1602	1.07083	1.08468	0	1
GMTTLLSSLGAQCVIASR	Q16698	N-Term(Dimethyl); C13(Carbamidomethyl)	1892.99	1.66503	1.23816	1.34627	0	0
AEDGATPSPSNETPKK	A0A087WZH7	N-Term(Dimethyl); K15(Dimethyl); K16(Dimethyl)	1712.86				0	1
HLEDHQAHCEFALMDCPQCQRPFQK	Q9Y4K3	N-Term(Dimethyl); Q6(Deamidated); C9(Carbamidomethyl); C16(Carbamidomethyl); C19(Carbamidomethyl); K25(Dimethyl)	3239.44				0	0
RKEDEVEEWQHR	E7EQR4	N-Term(Dimethyl); K2(Dimethyl)	1696.83	0.815706	0.93027	0.877837	0	2
DFPEYTFAIADEEDYAGEVK	P13667	N-Term(Dimethyl); K20(Dimethyl)	2365.07	0.907791	1.11829	0.812684	0	0
LEQQVPVNQVFGQDEMIDVIGVTK	P39023	N-Term(Dimethyl); K24(Dimethyl)	2742.43	1.24251	1.14418	1.08717	0	0
GILGYTEHQVVSSDFNSDTHSSTFDAGAGIALNDHFVK	P04406	N-Term(Dimethyl); N16(Deamidated); N33(Deamidated); K38(Dimethyl)	4094.95				0	0
LATQSNEITIPVTFESR	P04792	N-Term(Dimethyl)	1934.02	0.72859	1.0918	1.02575	0	0
QFASQANVVGPWIQTK	O43707	N-Term(Dimethyl); K16(Dimethyl)	1829.98	1.13095	0.947889	1.19447	0	0
LLSRPQDALEGVVLSPSLEAR	Q9NVI7	N-Term(Dimethyl)	2278.28	2.17855	1.50985	1.44452	0	0
SPDVGLYGVIPECGETYHSDLAEAK	P46940	N-Term(Dimethyl); C13(Carbamidomethyl); K25(Dimethyl)	2763.31				0	0
LGVPFQVLVATHAGLYR	M0R3C8	N-Term(Dimethyl)	1869.07	1.31377	1.22425	1.07433	0	0
NVLLDPQLVPGGGASEMAVAHALTEK	P49368	N-Term(Dimethyl); K26(Dimethyl)	2673.42	0.789112	0.851846	0.927399	0	0
ESVPLDDQEKLPFTVVHER	Q96S52	N-Term(Dimethyl); K10(Dimethyl)	2294.19	2.08534			0	1
HFIMQVVCEATQCPDTR	Q14974	N-Term(Dimethyl); C8(Carbamidomethyl); C13(Carbamidomethyl)	2119.97				0	0
LICCDILDVLDKHLIPAANTGESK	P62258	N-Term(Dimethyl); C3(Carbamidomethyl); C4(Carbamidomethyl); K12(Dimethyl); K24(Dimethyl)	2779.46	1.12917	1.04677	1.07993	0	1
LGVEPSDDDCVSVQHVCTIVSFR	P19367	N-Term(Dimethyl); C10(Carbamidomethyl); C17(Carbamidomethyl)	2647.24	1.05436	0.946039	1.11576	0	0
SEWGSLLEELVAEGK	P17858	N-Term(Dimethyl); K15(Dimethyl)	1702.88				0	0
INHSNNAIVKPPEMTPQAAAK	Q8WXA9	N-Term(Dimethyl); K10(Dimethyl); K21(Dimethyl)	2315.25	0.889317	0.821112	1.08428	0	0
LSELDDRADALQAGASQFETSAAK	J3QRU4;Q15836	N-Term(Dimethyl); K24(Dimethyl)	2550.26				0	1
AAYLQETGKPLDETLKK	P04083	N-Term(Dimethyl); K9(Dimethyl); K16(Dimethyl); K17(Dimethyl)	2017.15	1.00208	0.924923	1.10316	0	1
FFETCDLDNDKYIALDEWAGCFGIK	P09486	N-Term(Dimethyl); C5(Carbamidomethyl); K11(Dimethyl); C21(Carbamidomethyl); K25(Dimethyl)	3111.43				0	1
EPLPPIQQHIWNMLNPPAEVTTK	P13010	N-Term(Dimethyl); K23(Dimethyl)	2709.44	1.2528	0.979666	1.28025	0	0
DGFIDKEDLHDMLASLGK	P19105	N-Term(Dimethyl); K6(Dimethyl); K18(Dimethyl)	2088.06	1.03273	1.13055	0.914506	0	1
NQLDQEVEFLSTSIAQLK	Q99471	N-Term(Dimethyl); K18(Dimethyl)	2119.12				0	0
DQQEAALVDMVNDGVEDLR	P09211	N-Term(Dimethyl)	2145.01				0	0
MLPVDEFLPVMFDKHPVSEYK	Q8NBJ5	N-Term(Dimethyl); K14(Dimethyl); K21(Dimethyl)	2605.33	1.02091	1.01905	1.00295	0	1
YQQELEEEIKELYENFCK	Q6DD88	N-Term(Dimethyl); K10(Dimethyl); C17(Carbamidomethyl); K18(Dimethyl)	2476.19	1.12713	0.440314	2.56271	0	1
LQGINCGPDFTPSFANLGR	E7EX73	N-Term(Dimethyl); C6(Carbamidomethyl)	2092.02				0	0
LLVSMCQGNRDENQSINHQMAQEDAQR	P20073	N-Term(Dimethyl); C6(Carbamidomethyl)	3200.46	1.30807	1.05295	1.24368	0	1
LFPPWIKPADTEPPPLLVYK	Q6P2Q9	N-Term(Dimethyl); K7(Dimethyl); K20(Dimethyl)	2405.38	0.612175	0.882742	0.694274	0	0
APDELHYTYLDTFGRPVIVAYK	P04843	N-Term(Dimethyl); K22(Dimethyl)	2624.37	0.818456	1.0152	0.807112	0	0
VTIAQGGVLPNIQAVLLPK	Q96KK5;P04908	N-Term(Dimethyl); K19(Dimethyl)	1987.23				0	0
ISGWTQALPDMVVSHLFGK	Q92597	N-Term(Dimethyl); K19(Dimethyl)	2142.14	0.277767	0.495297	0.561441	0	0
ASASGSGAQVGGPISSGSSASSVTVTR	P02545	N-Term(Dimethyl)	2393.19	1.32799	1.22983	1.08103	0	0
LYIGLAGLATDVQTVAQR	P49720	N-Term(Dimethyl)	1917.08				0	0
DATNVGDEGGFAPNILENSEALELVK	P09104	N-Term(Dimethyl); K26(Dimethyl)	2758.37	0.526295	0.770968	0.683412	0	0
YAACNAVGQMATDFAPGFQK	O00410	N-Term(Dimethyl); C4(Carbamidomethyl); K20(Dimethyl)	2203.02				0	0
IDQLEGDHQLIQEALIFDNK	P12814	N-Term(Dimethyl); K20(Dimethyl)	2395.25	1.4364			0	0
LGGGMGSMNSVTGGMGMGLDR	A0A0A0MQW0	N-Term(Dimethyl)	2012.9	0.889745	0.857819	1.03839	0	0
QMEKDETVSDCSPHIANIGR	B1AK87	N-Term(Dimethyl); K4(Dimethyl); C11(Carbamidomethyl)	2343.1	0.910385	0.931508	0.978425	0	1
LRHDVMAHVHTFGHCCPK	P30566	N-Term(Dimethyl); C15(Carbamidomethyl); C16(Carbamidomethyl); K18(Dimethyl)	2258.08	0.80989	0.874459	0.927204	0	1
ALLADAQLMLDHLK	Q92614	N-Term(Dimethyl); K14(Dimethyl)	1607.91				0	0
LNTHVKPLIWIESVIEK	Q9BXS5	N-Term(Dimethyl); K6(Dimethyl); K17(Dimethyl)	2103.25	0.728569	0.888892	0.820561	0	0
TLSHPQQMALLDQTK	Q9Y490	N-Term(Dimethyl); K15(Dimethyl)	1766.94	0.974495	0.974258	1.00137	0	0
IEWLESHQDADIEDFKAK	P11021	N-Term(Dimethyl); K16(Dimethyl); K18(Dimethyl)	2258.13	0.721129	1.13494	0.636104	0	1
GEHSIVYLKPSYAFGSVGK	Q02790	N-Term(Dimethyl); K9(Dimethyl); K19(Dimethyl)	2123.15	0.859221	0.816528	1.05347	0	0
DGNASGTTLLEALDCILPPTRPTDKPLRLPLQDVYK	P68104	N-Term(Dimethyl); C15(Carbamidomethyl); K25(Dimethyl); K36(Dimethyl)	4062.17	1.4016	1.27049	1.10444	0	1
MVMIQDGPLPTGADKPLR	Q96I24	N-Term(Dimethyl); K15(Dimethyl)	1995.06				0	0
EMFGSGTACVVCPVSDILYK	P54687	N-Term(Dimethyl); C9(Carbamidomethyl); C12(Carbamidomethyl); K20(Dimethyl)	2289.09				0	0
QHFIQEEQILEIDCTMLTPEPVLK	P41250	N-Term(Dimethyl); C14(Carbamidomethyl); K24(Dimethyl)	2967.51				0	0
VIDFDENTALDDAEEESFR	Q14257	N-Term(Dimethyl)	2242.99	0.975281	1.20125	0.8128	0	0
VNPCIGGVILFHETLYQK	P04075	N-Term(Dimethyl); C4(Carbamidomethyl); K18(Dimethyl)	2144.15			0.340303	0	0
AVVYSNTIQSIMAIVK	P04899	N-Term(Dimethyl); K16(Dimethyl)	1793.02				0	0
RHVFGESDELIGQK	P60174;U3KPZ0	N-Term(Dimethyl); K14(Dimethyl)	1670.88				0	1
NLVDFLTGEEVVCHVAR	Q9H9J2	N-Term(Dimethyl); C13(Carbamidomethyl)	1986.01				0	0
LFVGGLSFDTNEQSLEQVFSK	Q14011	N-Term(Dimethyl); K21(Dimethyl)	2401.24			1.01673	0	0
MDKEETKDWILPSDYDHAEAEAR	O43852	N-Term(Dimethyl); K3(Dimethyl); K7(Dimethyl)	2833.33	0.954243	0.936444	1.02015	0	2
LTDLASQMAEMQLAELR	Q9NUQ6	N-Term(Dimethyl)	1947.98	0.998599	1.63379	0.611905	0	0
VYWETGAQITSPHDKEILK	Q6PCE3	N-Term(Dimethyl); K15(Dimethyl); K19(Dimethyl)	2299.23	0.447916	0.76761	0.584178	0	1
VSIAELAQASNSLIAWGR	Q96HY6	N-Term(Dimethyl)	1914.04	1.12502	1.12468	1.00143	0	0
QLIIVHGPPEASQDLAECCR	Q9P2I0	N-Term(Dimethyl); C18(Carbamidomethyl); C19(Carbamidomethyl)	2321.14				0	0
LLEPLVTQVTTLVNTNSK	P35221	N-Term(Dimethyl); K18(Dimethyl)	2026.18	1.05965	1.20613	0.87955	0	0
LLEMNLMHAPQVADAILGNQMFTHYDR	Q00610	N-Term(Dimethyl); Q11(Deamidated); N19(Deamidated)	3158.54				0	0
SALIAALCDKDVETLEAPEGRPDSGVPSLR	Q8WZA9	N-Term(Dimethyl); C8(Carbamidomethyl); K10(Dimethyl)	3222.67				0	1
HLEINPDHPIVETLR	P08238	N-Term(Dimethyl)	1810.97			0.128938	0	0
MMDYLQGSGETPQTDVR	Q14697;E9PKU7	N-Term(Dimethyl)	1955.88				0	0
ICPVETLVEEAIQCAEK	P30084	N-Term(Dimethyl); C2(Carbamidomethyl); C14(Carbamidomethyl); K17(Dimethyl)	2045.02				0	0
VAAGVLCELAQDKEAAEAIEAEGATAPLTELLHSR	B4DGU4	N-Term(Dimethyl); C7(Carbamidomethyl); K13(Dimethyl)	3689.89				0	1
AEAGPEGVAPAPEGEKK	A0A087X054	N-Term(Dimethyl); K16(Dimethyl); K17(Dimethyl)	1720.91				0	1
CLAFHDISPQAPTHFLVIPK	P49773	N-Term(Dimethyl); C1(Carbamidomethyl); K20(Dimethyl)	2347.26				0	0
AGGPLGLSIVGGSDHSSHPFGVQEPGVFISK	Q14160	N-Term(Dimethyl); K31(Dimethyl)	3089.6	1.11897	1.09699	1.02118	0	0
VGLTNYAAAYCTGLLLAR	P46777	N-Term(Dimethyl); C11(Carbamidomethyl)	1955.04				0	0
MTGGGFGGCTVTLLEASAAPHAMR	P51570	N-Term(Dimethyl); C9(Carbamidomethyl)	2420.14	0.8728	0.945041	0.924599	0	0
GSSVDAPPRPCHTTPDSQFGTEHVLR	Q9BSJ8	N-Term(Dimethyl); C11(Carbamidomethyl)	2876.36	0.9472	0.992469	0.955463	0	0
NFQCVDASVLNYDCDVQKK	Q13443	N-Term(Dimethyl); C4(Carbamidomethyl); C14(Carbamidomethyl); K18(Dimethyl); K19(Dimethyl)	2387.13				0	1
FHDFLGDSWGILFSHPR	P30041	N-Term(Dimethyl)	2059.01	0.3862	0.517314	0.74739	0	0
GTTGTQASFLQLFEGDDHKVEQLDK	P30566	N-Term(Dimethyl); K19(Dimethyl); K25(Dimethyl)	2848.43	1.11695	1.12792	0.99139	0	1
GHVDILAPTVQELAALEK	A0A087X2G1	N-Term(Dimethyl); K18(Dimethyl)	1960.1	0.965448	1.10129	0.877636	0	0
IQHSITAQDHQPTPDSCIISMVVGQLK	P61970	N-Term(Dimethyl); C17(Carbamidomethyl); K27(Dimethyl)	3059.55				0	0
FCSGDLGPEGILPDTHLLDPLLK	Q6PCB7	N-Term(Dimethyl); C2(Carbamidomethyl); K23(Dimethyl)	2563.34				0	0
SIAIGSQPVLTVGTTHISK	Q96DZ1	N-Term(Dimethyl); K19(Dimethyl)	1965.13	1.48968	2.54642	0.585669	0	0
GVTIIGPATVGGIKPGCFK	P53396	N-Term(Dimethyl); K14(Dimethyl); C17(Carbamidomethyl); K19(Dimethyl)	1956.13	0.980129	0.991978	0.989169	0	0
ETWKDLENAQFSEIQMER	Q6UX53	N-Term(Dimethyl); K4(Dimethyl)	2310.1	0.767998	0.784611	1.05829	0	1
GHTDSVQDISFDHSGK	P43034	N-Term(Dimethyl); K16(Dimethyl)	1785.83	0.967396	1.05482	0.91815	0	0
VELFFKDDANNDPQWSEEQLIAAK	P22234	N-Term(Dimethyl); K6(Dimethyl); K24(Dimethyl)	2891.44	1.08572	1.01635	1.06946	0	1
QLQQAQAAGAEQEVEK	P39748	N-Term(Dimethyl); K16(Dimethyl)	1783.92	1.24482	0.841036	1.48177	0	0
FQDLGAAYEVLSDSEK	Q9UBS4	N-Term(Dimethyl); K16(Dimethyl)	1827.9	1.17327	1.25296	0.937455	0	0
VELNALMTDETISNVPILILGNK	Q9NR31	N-Term(Dimethyl); K23(Dimethyl)	2553.41	0.973406	0.960303	1.01479	0	0
EGAAHAFAQYNLDQFTPVK	P47755	N-Term(Dimethyl); K19(Dimethyl)	2163.08	0.863402	0.936594	0.922891	0	0
MQQNIQELEEQLEEEESAR	P35579	N-Term(Dimethyl)	2361.08				0	0
FNQAQSGNIQSTVMLDK	P42224	N-Term(Dimethyl); K17(Dimethyl)	1936.97	0.417254			0	0
LKGTVGEPTYDAEFQHFLR	Q14204	N-Term(Dimethyl); K2(Dimethyl)	2264.17	1.74019			0	1
GLDVDSLVIEHIQVNKAPK	A0A087WXM6	N-Term(Dimethyl); K16(Dimethyl); K19(Dimethyl)	2159.24				0	1
YVATLGVEVHPLVFHTNR	P62826	N-Term(Dimethyl)	2080.13	0.866759	0.915716	0.947603	0	0
VNNSSLIGLGYTQTLKPGIK	P21796	N-Term(Dimethyl); K16(Dimethyl); K20(Dimethyl)	2187.27				0	0
SVIEQGGIQTVDQLIK	Q8WUM4	N-Term(Dimethyl); K16(Dimethyl)	1784.01	0.825878	0.89041	0.928571	0	0
NLSSDDANVLVWHALLLPDQPPYHLK	O14933	N-Term(Dimethyl); K26(Dimethyl)	3011.6	0.317001	0.842612	0.376636	0	0
FAHTNVESLVNEYDDNGEGIILFRPSHLTNK	P30101	N-Term(Dimethyl); K31(Dimethyl)	3585.78	0.47522	0.8132	0.585041	0	0
GLIAAICAGPTALLAHEIGFGSK	Q99497	N-Term(Dimethyl); C7(Carbamidomethyl); K23(Dimethyl)	2323.28				0	0
AAQLVDKDSTFLSTLEHHLSR	Q969V3	N-Term(Dimethyl); K7(Dimethyl)	2424.28				0	1
MSVQPTVSLGGFEITPPVVLR	P06748	N-Term(Dimethyl)	2255.24				0	0
LVQDVANNTNEEAGDGTTTATVLAR	P10809	N-Term(Dimethyl)	2588.27	1.91454	1.34957	1.42022	0	0
ATENDIYNFFSPLNPMR	P55795	N-Term(Dimethyl)	2056.98	0.587908	0.841384	0.699527	0	0
MALVSGISLDPEAAIGVTK	O14662	N-Term(Dimethyl); K19(Dimethyl)	1928.08			0.549956	0	0
AIEPPPLDAVIEAEHTLR	Q08211	N-Term(Dimethyl)	1999.08	1.28024	1.09185	1.17386	0	0
FFLQGIQLNTILPDAR	P11279	N-Term(Dimethyl)	1874.05				0	0
AVDIPHMDIEALKK	P62906	N-Term(Dimethyl); K13(Dimethyl); K14(Dimethyl)	1663.94	1.22601	1.02902	1.19277	0	1
MEEFKDQLPADECNK	P38646	N-Term(Dimethyl); K5(Dimethyl); C13(Carbamidomethyl); K15(Dimethyl)	1937.89				0	1
SALVQIYELEEHKIETWR	F8VYY9	N-Term(Dimethyl); K13(Dimethyl)	2300.22				0	1
AVAFFLESIAMHDIIAAEK	P78527	N-Term(Dimethyl); K19(Dimethyl)	2132.14				0	0
NQASCGSCYSFASMGMLEAR	P53634	N-Term(Dimethyl); C5(Carbamidomethyl); C8(Carbamidomethyl)	2254.93				0	0
FACNGTVIEHPEYGEVIQLQGDQR	P41567	N-Term(Dimethyl); C3(Carbamidomethyl)	2788.34				0	0
ETSSDVALASHILTALR	O00273	N-Term(Dimethyl)	1811.98				0	0
YEAAGTLVTLSSAPTAIK	P53618	N-Term(Dimethyl); K18(Dimethyl)	1849.02	1.13441	1.20955	0.938932	0	0
EAQTSFLHLGYLPNQLFR	A0A087X2G1	N-Term(Dimethyl)	2162.13	1.03892	1.12662	0.923194	0	0
SHQELISQLLQSYMK	Q9Y2H2	N-Term(Dimethyl); K15(Dimethyl)	1860.99				0	0
EKNQWQLSADDLKK	P09543	N-Term(Dimethyl); K2(Dimethyl); K13(Dimethyl); K14(Dimethyl)	1815	0.742956	0.891699	0.834129	0	2
AWDVLLDHIQSAALSK	Q7Z3U7	N-Term(Dimethyl); K16(Dimethyl)	1822.99				0	0
SVAAIHPSLEIPMLIPK	O60256	N-Term(Dimethyl); K17(Dimethyl)	1872.09	0.733152	0.95431	0.769119	0	0
STMVGTPYWMAPEVVTR	Q13177;Q13153;A0A087X294	N-Term(Dimethyl)	1952.95				0	0
QEAGISEGQGTAGEEEEK	O43583	N-Term(Dimethyl); K18(Dimethyl)	1904.87	0.862901	0.923509	0.935425	0	0
YVPAIAHLIHSLNPVR	Q9H3G5	N-Term(Dimethyl)	1828.05	0.412105	0.67365	0.612439	0	0
SILGTLTVEQIYQDRDQFAK	Q14254	N-Term(Dimethyl); K20(Dimethyl)	2381.27	0.942486	0.943422	1.00013	0	1
TRDELEVIHLIEEHR	P10155	N-Term(Dimethyl)	1917.02	1.08664	1.1517	0.944575	0	1
AMLSGPGQFAENETNEVNFR	E5RHG8	N-Term(Dimethyl)	2239.04	0.848962	1.20769	0.703755	0	0
AQQNNVEHKVETFSGVYKK	P62081	N-Term(Dimethyl); K9(Dimethyl); K18(Dimethyl); K19(Dimethyl)	2318.24	1.08402	1.07047	1.0138	0	2
GPVSGTEPEPVYSMEAADYR	Q14247	N-Term(Dimethyl)	2182.99				0	0
YKETDLLILFKDDYFAK	P05455	N-Term(Dimethyl); K2(Dimethyl); K11(Dimethyl); K17(Dimethyl)	2234.23	0.582883	0.940149	0.620688	0	2
CISEVQANNVVLGQYVGNPDGEGEATK	P11413;E7EUI8	N-Term(Dimethyl); C1(Carbamidomethyl); K27(Dimethyl)	2904.4				0	0
QAHILLDCGEDNVCKPK	P06756	N-Term(Dimethyl); C8(Carbamidomethyl); C14(Carbamidomethyl); K15(Dimethyl); K17(Dimethyl)	2081.05	0.959817	0.914227	1.05105	0	0
MPLATSTDHGHNLQTVQLLIK	Q01082	N-Term(Dimethyl); K21(Dimethyl)	2373.29	0.877622	0.953126	0.92182	0	0
HAEPEQNWEAVDGSQTETEKK	P11717	N-Term(Dimethyl); K20(Dimethyl); K21(Dimethyl)	2497.18	0.534873	0.876119	0.611191	0	1
LLKPGGVLTYCNLTSWGELMK	Q14353	N-Term(Dimethyl); K3(Dimethyl); C11(Carbamidomethyl); K21(Dimethyl)	2464.32	0.991851	0.932767	1.06454	0	0
LAMQEFMILPVGAANFR	P06733	N-Term(Dimethyl)	1936.01				0	0
EETVLATVQALQTASHLSQQADLR	P04844	N-Term(Dimethyl)	2637.38	0.951073	1.06557	0.893556	0	0
ELGLVDGQELAVADVTTPQTVLFK	Q8TBC4	N-Term(Dimethyl); K24(Dimethyl)	2599.43	1.14738	1.17224	0.979899	0	0
WKPPMIDNPSYQGIWKPR	P27824	N-Term(Dimethyl); K2(Dimethyl); M5(Oxidation); K16(Dimethyl)	2313.22	0.680942	0.643746	1.05897	0	0
HKELAPYDENWFYTR	P39019	N-Term(Dimethyl); K2(Dimethyl)	2024.98	0.8886	0.966122	0.905253	0	1
QRFPLGGDDEVMSSTLQQFSK	Q9UKG1	N-Term(Dimethyl); K21(Dimethyl)	2426.2	0.829587	0.947267	0.876755	0	1
VLDGLHNELQTIGFQIETIGK	O60701	N-Term(Dimethyl); K21(Dimethyl)	2381.3	0.881287	1.01542	0.868882	0	0
LDAENAIVHMGGQWLGGR	Q01085	N-Term(Dimethyl)	1951.97	1.16548	1.08669	1.07371	0	0
MSLHNLATVFGPTLLRPSEVESK	Q12979	N-Term(Dimethyl); K23(Dimethyl)	2582.4	1.00736	0.97645	1.03282	0	0
IYQNIQDGSLDLNAAESGVQHKPSAPQGGR	P61106	N-Term(Dimethyl); K22(Dimethyl)	3206.6				0	0
RFGVPVIADGGIQNVGHIAK	P12268	N-Term(Dimethyl); K20(Dimethyl)	2104.2				0	1
LRGIEQAVQSHAVAEEEAR	B9A067	N-Term(Dimethyl)	2121.09	1.09738	1.50938	0.72786	0	1
LQVTNVLSQPLTQATVK	P04844	N-Term(Dimethyl); K17(Dimethyl)	1896.11	0.979025	1.1149	0.879115	0	0
AVVTHSSGNHGQALTYAAK	Q9GZT4	N-Term(Dimethyl); K19(Dimethyl)	1968.02	0.951669	1.00762	0.945535	0	0
GVIVDKDFSHPQMPK	P48643	N-Term(Dimethyl); K6(Dimethyl); K15(Dimethyl)	1781.96	1.14693	1.10861	1.21598	0	1
RQFASQANVVGPWIQTK	O43707	N-Term(Dimethyl); K17(Dimethyl)	1986.08				0	1
DVIGIAHHPHQNLIATYSEDGLLK	Q2TAY7	N-Term(Dimethyl); K24(Dimethyl)	2697.43				0	0
GYNQFAYDGKDYIALNEDLR	Q29865;Q9TNN7;Q31612	N-Term(Dimethyl); K10(Dimethyl)	2421.16				0	1
SVMTEEYKVPDGMVGFIIGR	Q96AE4;C9JSZ1	N-Term(Dimethyl); K8(Dimethyl)	2284.18				0	1
ENGTVTAANASTLNDGAAALVLMTADAAK	P24752	N-Term(Dimethyl); K29(Dimethyl)	2817.41	0.812978	0.971268	0.83797	0	0
SDKSPDLAPTPAPQSTPR	F8WAE5	N-Term(Dimethyl); K3(Dimethyl)	1921	1.08224	1.08086	1.0024	0	1
GLGTDEDTLIEILASR	P04083	N-Term(Dimethyl)	1730.91	0.954998	0.918868	1.04049	0	0
LAQQQAAAAAAAAAAASQQGSAK	Q9BZK7	N-Term(Dimethyl); K23(Dimethyl)	2111.12	0.331848	0.385964	0.86076	0	0
TDASSASSFLDSDELER	Q14498	N-Term(Dimethyl)	1857.83				0	0
IYHPNVDENGQICLPIISSENWKPCTK	O14933	N-Term(Dimethyl); C13(Carbamidomethyl); K23(Dimethyl); C25(Carbamidomethyl); K27(Dimethyl)	3296.63	0.216814	1.00424	0.216141	0	0
GMTYDALHVFDWIK	I3L440	N-Term(Dimethyl); K14(Dimethyl)	1751.88				0	0
HCALALGNCALHGGQAVQR	Q6SZW1	N-Term(Dimethyl); C2(Carbamidomethyl); C9(Carbamidomethyl)	2061.02				0	0
VSQGSKDPAEGDGAQPEETPR	Q14697	N-Term(Dimethyl); K6(Dimethyl)	2211.04	0.87503	0.912912	0.911439	0	1
DSNYHLLMSVQESLER	P00367	N-Term(Dimethyl)	1948.94				0	0
FQLTDCQIYEVLSVIR	Q16555	N-Term(Dimethyl); C6(Carbamidomethyl)	2012.05	0.844677	0.874585	0.966891	0	0
DSEQVAELKQELATLK	O60763	N-Term(Dimethyl); K9(Dimethyl); K16(Dimethyl)	1886.04	1.02676	1.11786	0.919536	0	1
GYGTVIPPQASLVFHVLLIDVHNPK	Q96AY3	N-Term(Dimethyl); K25(Dimethyl)	2770.56	0.604843			0	0
THFFLNAGNLCNLNYGEGPK	Q9Y512	N-Term(Dimethyl); C11(Carbamidomethyl); K20(Dimethyl)	2322.13				0	0
CLVGEFVSDALLVPDK	P05067	N-Term(Dimethyl); C1(Carbamidomethyl); K16(Dimethyl)	1817.96	1.68281	1.11528	1.51057	0	0
IGSSLYALGTQDSTDICK	Q9UNH7	N-Term(Dimethyl); C17(Carbamidomethyl); K18(Dimethyl)	1984.99	0.733651	0.760169	0.966203	0	0
AGAAGGPEEEAEKPVK	Q8WW12	N-Term(Dimethyl); K13(Dimethyl); K16(Dimethyl)	1623.85	0.595878	0.806654	0.739535	0	0
GFGFVTFENIDDAKDAMMAMNGK	Q14011	N-Term(Dimethyl); K14(Dimethyl); N21(Deamidated); K23(Dimethyl)	2594.19				0	1
FSTHESAAHAIVSVNGTTIEGHVVK	Q01085	N-Term(Dimethyl); K25(Dimethyl)	2647.37	0.901872	0.949749	0.95066	0	0
VVLEKPFGHDHFSAQQLATELGTFFQEEEMYR	O95479	N-Term(Dimethyl); K5(Dimethyl)	3839.85	0.492124	0.596972	0.825296	0	0
HHGPQTLYLPVTLSSIPVFQR	Q14697;E9PKU7	N-Term(Dimethyl)	2418.32				0	0
MVHFLTHYADKIESVHFSDQFSGPK	Q96A33	N-Term(Dimethyl); K11(Dimethyl); K25(Dimethyl)	3004.49			0.880798	0	1
LLAALLEDEGGSGRPLLQAAK	Q9Y490	N-Term(Dimethyl); K21(Dimethyl)	2178.24				0	0
GNVGFVFTKEDLTEIR	P05388	N-Term(Dimethyl); K9(Dimethyl)	1881.01	1.21204	1.18195	1.02662	0	1
LGIQTDDKGHIIVDEFQNTNVK	P00390	N-Term(Dimethyl); K8(Dimethyl); K22(Dimethyl)	2568.36	0.656621	0.553147	1.1884	0	1
ITGEAFVQFASQELAEK	P52597	N-Term(Dimethyl); K17(Dimethyl)	1924				0	0
WARPPISMNFEVPFAPSGLK	A0A087WY71	N-Term(Dimethyl); K20(Dimethyl)	2300.22	0.734105	0.516939	1.4217	0	0
QRPYVVTFCGVNGVGK	P08240	N-Term(Dimethyl); C9(Carbamidomethyl); K16(Dimethyl)	1836.97				0	0
SGFARPGDVEFEDFSQPMNR	M0R2H7	N-Term(Dimethyl)	2314.05	0.955268	0.877876	1.08938	0	0
DAFEHIVTQFSSVPVSVVSDSYDIYNACEK	P43490	N-Term(Dimethyl); C28(Carbamidomethyl); K30(Dimethyl)	3462.62				0	0
RPLILQLVHVSQEDKR	G8JLD5	N-Term(Dimethyl); K15(Dimethyl)	1987.18	0.945116	0.983385	0.962168	0	1
DVLGTGAFSEVILAEDKR	Q14012	N-Term(Dimethyl); K17(Dimethyl)	1976.06	0.920484	1.18149	0.779965	0	1
SLADELALVDVLEDK	P07195	N-Term(Dimethyl); K15(Dimethyl)	1685.92				0	0
NLSLSGHVGFDSLPDQLVNK	D6RGI3	N-Term(Dimethyl); K20(Dimethyl)	2196.16	0.815606	0.745358	1.09548	0	0
AINCATSGVVGLVNCLR	P49327	N-Term(Dimethyl); C4(Carbamidomethyl); C15(Carbamidomethyl)	1831.95				0	0
SFSTFDKDTDSAITNCALSYK	P24821;J3QSU6	N-Term(Dimethyl); K7(Dimethyl); C16(Carbamidomethyl); K21(Dimethyl)	2455.16				0	1
ADCTITMADSDFLALMTGK	P22307	N-Term(Dimethyl); C3(Carbamidomethyl); K19(Dimethyl)	2116.99				0	0
MVSSLPSTADPSHQTMPANK	Q9NUQ6	N-Term(Dimethyl); K20(Dimethyl)	2155.05	0.67035	1.29865	0.516773	0	0
FAHTNVESLVNEYDDNGEGIILFRPSHLTNK	P30101	N-Term(Dimethyl); N11(Deamidated); K31(Dimethyl)	3586.79				0	0
IYHPNINSNGSICLDILR	P61077;A0A087WW00	N-Term(Dimethyl); N9(Deamidated); C13(Carbamidomethyl)	2128.08				0	0
GVGVFGDMAQDTGIPADIWR	P56192	N-Term(Dimethyl)	2133.04	0.730163	0.840678	0.869519	0	0
EDQSILCTGESGAGKTENTK	P35579;P35749;P35580	N-Term(Dimethyl); C7(Carbamidomethyl); K15(Dimethyl); K20(Dimethyl)	2209.06				0	1
EAMEDGEIDGNKVTLDWAKPK	P19338	N-Term(Dimethyl); K12(Dimethyl); K19(Dimethyl); K21(Dimethyl)	2458.24			1.19755	0	1
LLLAGYDDFNCNIWDAMK	P62879	N-Term(Dimethyl); C11(Carbamidomethyl); K18(Dimethyl)	2215.05				0	0
TPLVSVLLEGPPHSGK	I3L0N3	N-Term(Dimethyl); K16(Dimethyl)	1686.98			0.166359	0	0
VGTGEPCCDWVGDEGAGHFVK	P52209	N-Term(Dimethyl); C7(Carbamidomethyl); C8(Carbamidomethyl); K21(Dimethyl)	2333.03			0.435165	0	0
DAVSGMGVIVHIIEK	P49720	N-Term(Dimethyl); K15(Dimethyl)	1623.91	0.840386	0.791654	1.06275	0	0
SDGLQWSAEQPCNPSKPK	Q9NUQ6	N-Term(Dimethyl); C12(Carbamidomethyl); K16(Dimethyl); K18(Dimethyl)	2113.03	0.585969	0.585951	1.00116	0	0
IQVLQNMVHCADLSNPTKPLQLYR	A0A087WSZ7	N-Term(Dimethyl); C10(Carbamidomethyl); K18(Dimethyl)	2894.53	1.18322	1.13886	1.04013	0	0
NSVVEASEAAYKEAFEISK	Q04917	N-Term(Dimethyl); K12(Dimethyl); K19(Dimethyl)	2156.1	0.41115	0.668762	0.615486	0	1
IINEPTAAAIAYGLDKK	P11142;P54652	N-Term(Dimethyl); K16(Dimethyl); K17(Dimethyl)	1872.08				0	1
VVQGDIGEANEDVTQIVEILHSGPSK	Q86XP3	N-Term(Dimethyl); N10(Deamidated); K26(Dimethyl)	2791.45				0	0
DQGSCGSCWAFGAVEAISDR	P07858	N-Term(Dimethyl); C5(Carbamidomethyl); C8(Carbamidomethyl)	2200.93	1.10517	0.803102	1.37767	0	0
LGYTHLYSSTQVSVRPLQHTQYER	A0A0C4DGS1	N-Term(Dimethyl)	2891.47	0.704092	0.854339	0.825065	0	0
SLEDALSSDTSGHFR	P08133	N-Term(Dimethyl)	1649.77	0.781036	0.708165	0.887664	0	0
VDTVNHLADELINSGHSDAATIAEWK	Q01082	N-Term(Dimethyl); K26(Dimethyl)	2862.42	1.03368	0.855608	1.20949	0	0
QMVQVSDQDMNTHLAEISR	O15031	N-Term(Dimethyl)	2230.05				0	0
MLQEDELRDAVLLVFANK	P84085	N-Term(Dimethyl); K18(Dimethyl)	2160.17	0.814966	0.76576	1.06546	0	1
ALEYIPNNAYLHCQIGCCYR	P09913	N-Term(Dimethyl); C13(Carbamidomethyl); C17(Carbamidomethyl); C18(Carbamidomethyl)	2543.16	0.274246	0.595059	0.263519	0	0
QLAALGQTEPLPAEAPWAR	Q92974	N-Term(Dimethyl)	2047.09	0.398552	0.619063	0.644525	0	0
QEGLTFFGTELAPVR	Q96AQ6	N-Term(Dimethyl)	1692.9	3.80727	1.33569	2.85363	0	0
GEGYAKPNEGAIVEVALEGYYK	Q02790	N-Term(Dimethyl); K6(Dimethyl); K22(Dimethyl)	2441.25				0	0
RGFAFVTFDDHDSVDK	F8W6I7	N-Term(Dimethyl); K16(Dimethyl)	1911.92	1.20425	1.03167	1.16861	0	1
LWSNFWGALSPDEYYAR	O60568	N-Term(Dimethyl)	2102.99	1.35416	1.03061	1.31543	0	0
VAVPSTIHCDHLIEAQVGGEK	Q99798	N-Term(Dimethyl); C9(Carbamidomethyl); K21(Dimethyl)	2316.19	1.08277	1.08114	1.00264	0	0
EMEENFAVEAANYQDTIGR	P08670	N-Term(Dimethyl); N5(Deamidated)	2216				0	0
RGQTCVVHYTGMLEDGK	Q5W0X3	N-Term(Dimethyl); C5(Carbamidomethyl); K17(Dimethyl)	2006.97	0.632154	0.821349	0.77052	0	1
GDLAQGFSPVIQGHTDELWGLCTHPSQNR	Q32P44	N-Term(Dimethyl); C22(Carbamidomethyl)	3248.55	1.14527	0.951229	1.20535	0	0
NFEATLGWLQEHACSR	Q9P2J5	N-Term(Dimethyl); C14(Carbamidomethyl)	1946.91				0	0
IFCCHGGLSPDLQSMEQIR	P62140;F8VYE8;P62136	N-Term(Dimethyl); C3(Carbamidomethyl); C4(Carbamidomethyl)	2276.06				0	0
QELSHALYQHDAACR	Q9UMS4	N-Term(Dimethyl); C14(Carbamidomethyl)	1826.85	1.19529	1.06869	1.11973	0	0
SKGLAPDLPEDLYHLIK	P62277	N-Term(Dimethyl); K2(Dimethyl); K17(Dimethyl)	1993.13	0.914746	0.890902	1.02792	0	1
IMRPTDVPDTGLLCDLLWSDPDKDVQGWGENDR	P62140	N-Term(Dimethyl); C14(Carbamidomethyl); K23(Dimethyl)	3869.84	1.87987	1.29063	1.45819	0	1
IFSSVQWLSGVKPVLSTK	Q9C0C9	N-Term(Dimethyl); K12(Dimethyl); K18(Dimethyl)	2060.22	0.946517	1.04618	0.905752	0	0
VDHQTGPIVWGEPGTNGQHAFYQLIHQGTK	P06744	N-Term(Dimethyl); N16(Deamidated); K30(Dimethyl)	3372.65	0.210593	0.676865		0	0
FAHTNVESLVNEYDDNGEGIILFRPSHLTNKFEDK	P30101	N-Term(Dimethyl); N11(Deamidated); K31(Dimethyl); K35(Dimethyl)	4134.04				0	1
GQHVTGSPFQFTVGPLGEGGAHK	O75369	N-Term(Dimethyl); K23(Dimethyl)	2364.2				0	0
APKPDGPGGGPGGSHMGGNYGDDR	P35637	N-Term(Dimethyl); K3(Dimethyl)	2309.03	1.12224	0.971336	1.0854	0	0
IKSGEEDFESLASQFSDCSSAK	Q13526	N-Term(Dimethyl); K2(Dimethyl); C18(Carbamidomethyl); K22(Dimethyl)	2506.15			1.19412	0	1
IGEEQSPEDAEDGPPELLFIHGGHTAK	Q09028	N-Term(Dimethyl); K27(Dimethyl)	2929.42				0	0
VADLVHILTHLQLLR	P51617	N-Term(Dimethyl)	1769.07	0.934939	1.08272	0.864484	0	0
SLTNDWEDHLAVK	P08238;P07900	N-Term(Dimethyl); K13(Dimethyl)	1583.8				0	0
DGGNPFAEPSELDNPFQDPAVIQHRPSR	O14828	N-Term(Dimethyl)	3118.49	1.2625	1.20744	1.04678	0	0
TLMELLNQMDGFDTLHR	P62333	N-Term(Dimethyl)	2062.01	1.03294	1.07291	0.963828	0	0
LTIHAPPQELGPPVQR	P12270	N-Term(Dimethyl)	1781.01	0.84322	0.707361	1.19341	0	0
MAESMLAILCHILR	Q7Z6Z7	N-Term(Dimethyl); C10(Carbamidomethyl)	1685.88				0	0
EVTWEVLEGEVEKEALKK	P05455	N-Term(Dimethyl); K13(Dimethyl); K17(Dimethyl); K18(Dimethyl)	2228.23				0	2
QLLQANPILEAFGNAK	P35579;P35749	N-Term(Dimethyl); K16(Dimethyl)	1783.01				0	0
TILSNQTVDIPENVDITLK	P32969	N-Term(Dimethyl); K19(Dimethyl)	2169.2	1.11411	1.12185	0.994223	0	0
LGDLWTLDIDTLTWNKPSLSGVAPLPR	P51610	N-Term(Dimethyl); K16(Dimethyl)	3034.66	1.00516	1.04481	0.963134	0	0
YQVFFFGTHETAFLGPK	P51858	N-Term(Dimethyl); K17(Dimethyl)	2045.04	0.466385	0.673563	0.693194	0	0
GDADQASNILASFGLSAR	P43243	N-Term(Dimethyl)	1820.91				0	0
NHNSLLSLPQEPYSFSEPAQQAMR	P10253	N-Term(Dimethyl)	2772.34	0.565508	0.746219	0.758685	0	0
VLSVETPLSIQAHPNKELAEK	P34949	N-Term(Dimethyl); K16(Dimethyl); K21(Dimethyl)	2387.34	0.649832	0.825472	0.788111	0	1
LQQVLQMESHIQSTSDR	Q14974	N-Term(Dimethyl)	2028.01				0	0
ASLNGADIYSGCCTLK	P14866	N-Term(Dimethyl); C12(Carbamidomethyl); C13(Carbamidomethyl); K16(Dimethyl)	1785.84	0.999291	1.01122	0.989316	0	0
AITVFSPDGHLFQVEYAQEAVKK	O14818	N-Term(Dimethyl); K22(Dimethyl); K23(Dimethyl)	2661.42	0.897617	0.931999	0.964195	0	1
LLGPDAAINLTDPDGALAK	Q13561	N-Term(Dimethyl); K19(Dimethyl)	1921.06	1.03767	0.962016	1.07985	0	0
AASDIAMTELPPTHPIR	P62258	N-Term(Dimethyl)	1847.96	1.68782			0	0
IDGDKDGFVTVDELKDWIK	O43852	N-Term(Dimethyl); K5(Dimethyl); K15(Dimethyl); K19(Dimethyl)	2305.22	0.945598	0.955431	1.02876	0	2
HGEVCPAGWKPGSDTIKPDVQK	Q06830	N-Term(Dimethyl); C5(Carbamidomethyl); K10(Dimethyl); K17(Dimethyl); K22(Dimethyl)	2518.3	0.938571	0.842731	1.89283	0	0
TVQLTSSELESTLETLK	P42704	N-Term(Dimethyl); K17(Dimethyl)	1935.05	1.24311	1.13104	1.10032	0	0
ILGQEGDASYLASEISTWDGVIVTPSEK	B4DY09	N-Term(Dimethyl); K28(Dimethyl)	3021.52	0.723732	0.693165	1.04527	0	0
EILTLLQGVHQGAGFQDIPK	H7C1D4	N-Term(Dimethyl); K20(Dimethyl)	2220.24			1.51249	0	0
GMYDGPVYEVPATPK	E9PD68	N-Term(Dimethyl); K15(Dimethyl)	1679.83	0.508796	0.634247	0.803109	0	0
RPLMVLGSQALLTPTSADKLR	A1L0T0	N-Term(Dimethyl); K19(Dimethyl)	2323.35	0.689836	0.968903	0.712778	0	1
LASQANIAQVLAELK	P63010;Q10567	N-Term(Dimethyl); K15(Dimethyl)	1624.96				0	0
QRVDVEDLGVDFLTIVGHK	H7C3V9	N-Term(Dimethyl); K19(Dimethyl)	2196.2	0.478692	0.572647	0.83687	0	1
IIMTSSASGIYGNFGQANYSAAK	P51659	N-Term(Dimethyl); K23(Dimethyl)	2407.19	1.0048	1.01076	0.995227	0	0
VAPEEHPVLLTEAPLNPK	P60709	N-Term(Dimethyl); K18(Dimethyl)	2010.12	1.42465	1.05591	1.35074	0	0
AAYLQETGKPLDETLK	P04083	N-Term(Dimethyl); K9(Dimethyl); K16(Dimethyl)	1861.03	0.807368	0.887474	0.95197	0	0
GGSCSQAASSNSAQGSDESLIACKA	Q29865;Q9TNN7;Q29963;P30510	N-Term(Dimethyl); C4(Carbamidomethyl); C23(Carbamidomethyl); K24(Dimethyl)	2499.1				0	1
QVEHPLLSGLLYPGLQALDEEYLK	P54577	N-Term(Dimethyl); Q16(Deamidated); K24(Dimethyl)	2782.51				0	0
FVCMLVTEDNVFEAPTIVK	Q13740	N-Term(Dimethyl); C3(Carbamidomethyl); K19(Dimethyl)	2268.16				0	0
GHLDNISNNLLIGAINIENGK	Q99798	N-Term(Dimethyl); K21(Dimethyl)	2275.24	0.863698	0.896291	0.964722	0	0
GLNPLNAYSDLAEFLETECYQTPFNK	O14879	N-Term(Dimethyl); C19(Carbamidomethyl); K26(Dimethyl)	3090.47	0.333544	0.971443	0.343736	0	0
SLISVIHLITAAR	O14735	N-Term(Dimethyl)	1421.88	0.746824	0.669196	1.11726	0	0
NVDLLSDMVQEHDEPILK	F8VY35	N-Term(Dimethyl); K18(Dimethyl)	2151.09	1.39041	1.21153	1.14895	0	0
VLSLETSVNELNSQLNESK	Q15075	N-Term(Dimethyl); K19(Dimethyl)	2160.14	0.806202	0.949126	1.21029	0	0
TVQTAAANAASTAASSAAQNAFK	O15126	N-Term(Dimethyl); K23(Dimethyl)	2208.12	0.640773			0	0
VEESGEHVILGTGELYLDCVMHDLRK	Q15029	N-Term(Dimethyl); C19(Carbamidomethyl); K26(Dimethyl)	3055.51				0	1
LIDWGLAEFYHPGQEYNVR	E7EU96	N-Term(Dimethyl)	2335.14	1.07979	1.04819	1.03131	0	0
EAILLHFSTDPVAASIMK	Q9BZV1	N-Term(Dimethyl); K18(Dimethyl)	1999.09				0	0
SLSTTNVFACSDRPTVIYSSNHK	Q16531	N-Term(Dimethyl); C10(Carbamidomethyl); K23(Dimethyl)	2640.3	0.918117	0.819602	1.12146	0	0
SSQIGAVVSHQSSVIPDR	Q9NVS9	N-Term(Dimethyl)	1894.99	0.462041	0.346047	1.3367	0	0
SVNESLNNLFITEEDYQALR	Q00610;K7EJJ5	N-Term(Dimethyl); N7(Deamidated)	2384.17				0	0
LLEPLVTQVTTLVNTSNK		N-Term(Dimethyl); K18(Dimethyl)	2026.18				0	0
MLDEMKDNLLLDMYLAPHVR	C9JFE4	N-Term(Dimethyl); K6(Dimethyl)	2473.26	0.959636	1.07638	0.892542	0	1
AGAAAGGPGVSGVCVCK	Q16270	N-Term(Dimethyl); C14(Carbamidomethyl); C16(Carbamidomethyl); K17(Dimethyl)	1573.77	1.23613	1.01922	1.21419	0	0
GWVLGPNNYYSFASQQQKPEDTTIPSTELAK	R4GMR5	N-Term(Dimethyl); K18(Dimethyl); K31(Dimethyl)	3553.77	1.01791	0.670475	1.5199	0	0
VDHQTGPIVWGEPGTNGQHAFYQLIHQGTK	P06744	N-Term(Dimethyl); K30(Dimethyl)	3371.68				0	0
LVGSQEELASWGHEYVR	Q13200	N-Term(Dimethyl)	1987.98	0.933174	0.820013	0.819105	0	0
EALVDTLTGILSPVQEVR	Q96P70	N-Term(Dimethyl)	1968.09	1.05845	0.868237	1.22046	0	0
TDYNASVSVPDSSGPER	P61978;Q5T6W2	N-Term(Dimethyl)	1808.82				0	0
ETTDTDTADQVIASFK	O43707	N-Term(Dimethyl); K16(Dimethyl)	1797.87	1.41367	1.13703	1.24471	0	0
AEQINQAAGEASAVLAK	Q9UJZ1	N-Term(Dimethyl); K17(Dimethyl)	1726.92	1.21462	1.01886	1.19348	0	0
IPAHQVLYSTSGENASGK	Q9NZM1	N-Term(Dimethyl); K18(Dimethyl)	1914.99	1.57191	1.15144	1.36671	0	0
CDRVDQLTAQLADLAAR	P18206	N-Term(Dimethyl); C1(Carbamidomethyl)	1943.99				0	1
MLSAVSQQVQCIQEALR	Q14204	N-Term(Dimethyl); C11(Carbamidomethyl)	1989.02				0	0
LWAHVYAGAPVSSPEYTK	P61086	N-Term(Dimethyl); K18(Dimethyl)	2032.05		1.0983		0	0
QIWTLEQPPDEAGSAAVCLR	Q16658	N-Term(Dimethyl); C18(Carbamidomethyl)	2269.13	1.38641	1.5442	1.02535	0	0
AEGSDVANAVLDGADCIMLSGETAK	P14618;H3BR70	N-Term(Dimethyl); C16(Carbamidomethyl); M18(Oxidation); K25(Dimethyl)	2566.2				0	0
LILADALCYAHTFNPK	P28838	N-Term(Dimethyl); C8(Carbamidomethyl); K16(Dimethyl)	1903.01	0.500386	0.815015	0.614651	0	0
AGLQDASGNLVPLEDVHIK	Q9UKK3	N-Term(Dimethyl); K19(Dimethyl)	2032.1				0	0
HTHVQDGEAGGITQQIGATNVPLEAINEQTK	A0A087WUT6	N-Term(Dimethyl); K31(Dimethyl)	3312.68				0	0
DFNHINVELSLLGK	P32969	N-Term(Dimethyl); K14(Dimethyl)	1654.91	1.10931	1.11853	0.992878	0	0
TGDFQLHTNVNDGTEFGGSIYQK	A0A0A0MR02	N-Term(Dimethyl); K23(Dimethyl)	2584.22	0.846895	1.09098	0.777143	0	0
LNFSHGTHEYHAETIK	P14618	N-Term(Dimethyl); K16(Dimethyl)	1939.96	0.0177075	0.295584	0.510007	0	0
EFQQNNWHAVGCGFR	Q9NZL9	N-Term(Dimethyl); C12(Carbamidomethyl)	1877.84	0.935201	0.921604	1.0159	0	0
MASTFIGNSTAIQELFK	Q9BUF5	N-Term(Dimethyl); K17(Dimethyl)	1914				0	0
VTEGLTDVILYHQPDDK	O60506;B7Z645	N-Term(Dimethyl); K17(Dimethyl)	1999.03				0	0
TDNAGDQHGGGGGGGGGAGAAGGGGGGENYDDPHK	P14866	N-Term(Dimethyl); K35(Dimethyl)	3037.26	1.00732	1.05083	0.909203	0	0
GFGFVTFDDHDPVDK	P22626	N-Term(Dimethyl); K15(Dimethyl)	1751.83	0.867628	0.995506	0.822725	0	0
EKEISGLWNELDSLKDAVEHQR	Q86UP2	N-Term(Dimethyl); K2(Dimethyl); K15(Dimethyl)	2680.38	1.13508	0.979488	1.16015	0	2
EELQANGSAPAADKEEPAAAGSGAASPSAAEK	A0A087WZH7	N-Term(Dimethyl); N6(Deamidated); K14(Dimethyl); K32(Dimethyl)	3067.45				0	1
EIFISNITQANPGIVTCLENHPHK	A0AVT1	N-Term(Dimethyl); C17(Carbamidomethyl); K24(Dimethyl)	2788.44	0.944505	1.57268	0.601245	0	0
AVHEQLAALSQGPISKPK	U3KQA6	N-Term(Dimethyl); K16(Dimethyl); K18(Dimethyl)	1958.14				0	0
ELDPTNMTYITNQAAVYFEK	P31948	N-Term(Dimethyl); K20(Dimethyl)	2404.18	1.41739	1.66605	0.851708	0	0
FQYCVAVGAQTFPSVSAPSK	P55265	N-Term(Dimethyl); C4(Carbamidomethyl); K20(Dimethyl)	2200.11				0	0
HHSDGSVSLSGHLQPPPVTTEQHGAR	O15533	N-Term(Dimethyl)	2759.36	0.398141	1.03747	0.351367	0	0
ISLGLPVGAVINCADNTGAK	P62829	N-Term(Dimethyl); C13(Carbamidomethyl); K20(Dimethyl)	2026.09				0	0
ATAPVSFNYYGVVTGPSASK	Q5VW32	N-Term(Dimethyl); K20(Dimethyl)	2072.06	0.976973	0.8465	1.15543	0	0
MAVTFIGNSTAIQELFK	P07437	N-Term(Dimethyl); N8(Deamidated); K17(Dimethyl)	1927.03	0.898584	0.9884	0.910154	0	0
WEDTVEKDQELAQESPPGMAGVENEDEAELNLR	P48681	N-Term(Dimethyl); K7(Dimethyl)	3784.74	2.00041	1.48399	1.34952	0	1
IAILHENFTTVKPEDAYEDFIVKPPVR	O43237	N-Term(Dimethyl); K12(Dimethyl); K23(Dimethyl)	3225.74				0	0
FKLDLDFPNLPYLLDGK	P21266	N-Term(Dimethyl); K2(Dimethyl); K17(Dimethyl)	2092.18	0.776792			0	1
GAEAANVTGPDGVPVEGSR	P16989	N-Term(Dimethyl)	1810.89	0.728185	0.573571	1.27099	0	0
SLQSLEASLHAMESTR	Q9UQE7	N-Term(Dimethyl)	1787.89				0	0
SYYSVQTAEWQAHPLYGSRPTLPR	Q8NBM8	N-Term(Dimethyl)	2835.41	1.30008	1.21404	1.07208	0	0
HNIMDFAMPYFIQVMK	Q00610;K7EJJ5	N-Term(Dimethyl); K16(Dimethyl)	2041.01				0	0
RPPSPIKFDLNEPLHLSFLQNAAK	A0AVT1	N-Term(Dimethyl); K7(Dimethyl); K24(Dimethyl)	2816.58	0.909218	0.914543	0.995298	0	1
VQDDEVGDGTTSVTVLAAELLR	P78371	N-Term(Dimethyl)	2316.19				0	0
AAFGLSEAGFNTACVTK	P31040	N-Term(Dimethyl); C14(Carbamidomethyl); K17(Dimethyl)	1799.9	1.38662	1.26946	1.09353	0	0
FMVQSMFAPTDTSDMEAVWK	O95292	N-Term(Dimethyl); K20(Dimethyl)	2377.09				0	0
NAEPLINLDVNNPDFK	Q9Y224	N-Term(Dimethyl); K16(Dimethyl)	1868.97	0.984737	1.28608	0.766551	0	0
HVAEVLEYTKDEQLESLFQR	P05198	N-Term(Dimethyl); K10(Dimethyl)	2490.28				0	1
TATANGFQMVTSGVQSK	Q969V3	N-Term(Dimethyl); N5(Deamidated); K17(Dimethyl)	1783.89	0.977979	0.99347	0.985516	0	0
AGDWQCPNPGCGNQNFAWR	B0QYK0	N-Term(Dimethyl); C6(Carbamidomethyl); C11(Carbamidomethyl)	2262.95				0	0
SAESPTSPVTSETGSTFKK	Q02952	N-Term(Dimethyl); K18(Dimethyl); K19(Dimethyl)	2025.03	1.13731	1.00594	1.13187	0	1
VAGTGEGGLEEMVEELNSGK	Q9UJU6	N-Term(Dimethyl); K20(Dimethyl)	2062				0	0
ISIVEALTLLNNHK	Q9P032	N-Term(Dimethyl); K14(Dimethyl)	1620.97				0	0
GLTEGLHGFHVHEFGDNTAGCTSAGPHFNPLSR	P00441	N-Term(Dimethyl); N17(Deamidated); C21(Carbamidomethyl); N29(Deamidated)	3549.65				0	0
VLECLASGIVMPDGSGIYDPCEK	Q12906	N-Term(Dimethyl); C4(Carbamidomethyl); C21(Carbamidomethyl); K23(Dimethyl)	2566.22	0.831197	0.891019	0.933912	0	0
ATSNVFAMFDQSQIQEFK	P19105	N-Term(Dimethyl); K18(Dimethyl)	2147.04	1.45042	1.21353	1.19656	0	0
DVNLRPEQLGDICVGNVLQPGAGAIMAR	P09110	N-Term(Dimethyl); C13(Carbamidomethyl); N16(Deamidated)	2992.55				0	0
TLQALEFHTVPFQLLAR	Q08380	N-Term(Dimethyl)	2012.13	0.43153	0.803204	0.537866	0	0
LLALHNVSFMELLSAHR	P29590	N-Term(Dimethyl)	1979.08	0.376845	0.688755	0.547756	0	0
QVELALWDTAGQEDYDR	Q5JR08;P62745;P61586	N-Term(Dimethyl)	2036.95				0	0
QVGNVTKPTVIISQEGDKVVIR	O15540	N-Term(Dimethyl); K7(Dimethyl); Q14(Deamidated)	2437.4				0	1
VRTDITYPAGFMDVISIDK	P62701	N-Term(Dimethyl); K19(Dimethyl)	2197.16	1.0656	1.10896	0.961977	0	1
EVIRNDGVLLLQALTR	O60763	N-Term(Dimethyl)	1838.08	0.930087	1.22184	0.762076	0	1
LQLEYCSLSAASCEPLASVLR	P13489	N-Term(Dimethyl); C6(Carbamidomethyl); C13(Carbamidomethyl)	2395.19	0.966728	0.85754	1.1286	0	0
LEICNLTPDTLTSDTYKK	P17655	N-Term(Dimethyl); C4(Carbamidomethyl); K17(Dimethyl); K18(Dimethyl)	2196.14				0	1
IEVPLYSLLEQTHLK	Q92598	N-Term(Dimethyl); K15(Dimethyl)	1839.06	1.18734	1.06006	1.12134	0	0
SVNGLAFYDWDNTELIR	P35606	N-Term(Dimethyl)	2041	1.24408	1.7439	0.714191	0	0
IEGDMIVCAAYAHELPK	P46777	N-Term(Dimethyl); C8(Carbamidomethyl); K17(Dimethyl)	1972.98				0	0
FRECNMGNLICDAMINNNLR	P21589	N-Term(Dimethyl); C4(Carbamidomethyl); C11(Carbamidomethyl)	2483.13				0	1
LVVEEYYEVLDHCSSILNKYDDNVK	O00170	N-Term(Dimethyl); C13(Carbamidomethyl); K19(Dimethyl); K25(Dimethyl)	3128.53	0.780811	0.736237	1.06174	0	1
LHIIEVGTPPTGNQPFPK	Q00610	N-Term(Dimethyl); K18(Dimethyl)	2001.11	1.16154	0.956629	1.21557	0	0
LKQEYFVVAATLQDIIR	P06737;P11216	N-Term(Dimethyl); K2(Dimethyl)	2063.18				0	1
GFAYVQFEDVRDAEDALHNLDR	Q5JRI1	N-Term(Dimethyl)	2608.23	1.17497	1.3607	0.864479	0	1
STQLLQAAAAEASLNK	A0A087WUK0	N-Term(Dimethyl); K16(Dimethyl)	1671.93	0.616557	0.840024	0.894006	0	0
NVAQYNANHPDFPMQIEQLER	Q14204	N-Term(Dimethyl)	2542.2	1.45787	1.02666	1.42161	0	0
SLVIELDKDLYGPDNHLVEWHR	Q96GM5	N-Term(Dimethyl); K8(Dimethyl)	2704.4	0.891618	0.951686	0.937938	0	1
GSLGGGFSSGGFSGGSFSR	P13645	N-Term(Dimethyl)	1735.8	0.611568	1.72664	0.354595	0	0
THMTHHAVSDHEATLR	P01892	N-Term(Dimethyl)	1870.89	0.459905	0.862659	0.531493	0	0
YFNVHELEALLQEMSSK	Q5JRA6	N-Term(Dimethyl); K17(Dimethyl)	2094.05	1.05727	1.1747	0.901043	0	0
DKNEQAFEEVFQNANFR	P27694	N-Term(Dimethyl); K2(Dimethyl)	2142.01	1.17266	1.32951	0.883019	0	1
ESVNAAFEMTLTEGSKLEK	P30084	N-Term(Dimethyl); K16(Dimethyl); K19(Dimethyl)	2168.11	1.47945	1.3003	1.13905	0	1
CQNEQLQTAVTQQVSQIQQHK	O60763	N-Term(Dimethyl); C1(Carbamidomethyl); Q12(Deamidated); K21(Dimethyl)	2553.29				0	0
RFDEILEASDGIMVAR	P14618;H3BR70	N-Term(Dimethyl)	1849.94				0	1
LGDVGMAELCPGLLHPSSR	P13489	N-Term(Dimethyl); C10(Carbamidomethyl)	2037.02	0.865492	1.06449	0.813974	0	0
QLFALSCTAEEQGVLPDDLSGVIR	P04899	N-Term(Dimethyl); C7(Carbamidomethyl); Q12(Deamidated)	2647.34				0	0
SLVASLAEPDFVVTDFAK	P22314	N-Term(Dimethyl); K18(Dimethyl)	1965.04	0.811476	0.946972	0.857882	0	0
AAGFDEIEQDLTQRFEEK	O95786	N-Term(Dimethyl); K18(Dimethyl)	2182.06	0.223125	0.779135	0.286698	0	1
GQVLNSDELQELYEGLR	O00764	N-Term(Dimethyl)	1991.01				0	0
DILVLPLDLTDTGSHEAATK	Q9Y394	N-Term(Dimethyl); K20(Dimethyl)	2165.16	0.664245	0.814132	0.816813	0	0
TEEQGIPRPLHPPPPPPVQPPQHPR	S4R3H4	N-Term(Dimethyl)	2826.51	1.53486			0	0
RKDSAIQQQVANLQMK	Q14204	N-Term(Dimethyl); K2(Dimethyl); K16(Dimethyl)	1942.08				0	2
FAAYFQQGDMESNGKYITK	P06744	N-Term(Dimethyl); N13(Deamidated); K15(Dimethyl); K19(Dimethyl)	2283.09	0.542852	0.540193	1.00605	0	1
VPADTEVVCAPPTAYIDFAR	P60174	N-Term(Dimethyl); C9(Carbamidomethyl)	2220.1	0.687143	1.10549	0.544503	0	0
LTDFGFCAQITPEQSKR	Q13177;Q13153;A0A087X294	N-Term(Dimethyl); C7(Carbamidomethyl); K16(Dimethyl)	2054.03				0	1
APDELHYTYLDTFGRPVIVAYKK	P04843	N-Term(Dimethyl); K22(Dimethyl); K23(Dimethyl)	2780.49	0.899978	0.980811	0.583512	0	1
AAPRPAPVAQPPAAAPPSAVGSSAAAPR	Q9Y6H1	N-Term(Dimethyl)	2561.39				0	0
HHAAYVNNLNVTEEK	A0A0C4DFU2	N-Term(Dimethyl); K15(Dimethyl)	1794.91	0.603525	0.815239	0.741139	0	0
ESQFLKEELVAAVEDVRK	P35221	N-Term(Dimethyl); K6(Dimethyl); K18(Dimethyl)	2174.21	1.07141	0.849042	1.26333	0	2
AGSDGESIGNCPFSQR	Q9Y696	N-Term(Dimethyl); C11(Carbamidomethyl)	1709.75	1.03775	1.21168	0.85742	0	0
MLLDPMGGIVMTNDGNAILR	P49368	N-Term(Dimethyl)	2159.1				0	0
MSATFIGNSTAIQELFK	Q9BVA1;Q13885;P68371	N-Term(Dimethyl); K17(Dimethyl)	1914				0	0
ALEHAFQLEHIMDLTR	Q14204	N-Term(Dimethyl)	1952				0	0
LNLPINIIGLAPLCENMPSGK	P28838	N-Term(Dimethyl); C14(Carbamidomethyl); K21(Dimethyl)	2320.28	0.649693	0.996626	0.652627	0	0
CSEGVFLLTTTPRPVIVEPLEQLDDEDGLPEK	P23246	N-Term(Dimethyl); C1(Carbamidomethyl); K32(Dimethyl)	3652.86				0	0
THINIVVIGHVDSGK	P68104;Q05639	N-Term(Dimethyl); K15(Dimethyl)	1644.94				0	0
ILQEYVEHQVDDAMMANAAQK	P08243	N-Term(Dimethyl); K21(Dimethyl)	2460.18				0	0
YYAEMCASPDQSDTALLEEELKK	Q6PCE3	N-Term(Dimethyl); C6(Carbamidomethyl); K22(Dimethyl); K23(Dimethyl)	2775.32	0.454756	0.657648	0.692268	0	1
RLCAAAASILGKPADR	P30046	N-Term(Dimethyl); C3(Carbamidomethyl); K12(Dimethyl)	1725.97	0.80244	0.873346	0.919847	0	1
HYFQNTQGLIFVVDSNDRER	P84085;P61204;P18085	N-Term(Dimethyl)	2466.21				0	1
SEAEEAITSFNGHKPPGSSEPITVK	Q15717	N-Term(Dimethyl); K14(Dimethyl); K25(Dimethyl)	2696.37				0	0
ELHSEFSEVMNEIWASDQIR	P40939	N-Term(Dimethyl)	2448.14				0	0
LSLDGQNIYNACCTLR	A6NLN1	N-Term(Dimethyl); C12(Carbamidomethyl); C13(Carbamidomethyl)	1925.92			0.712258	0	0
FNHFSLTLNTNHGHILVDYSK	P06744	N-Term(Dimethyl); K21(Dimethyl)	2513.29	0.334319	0.169138	1.98014	0	0
YSHDFNFHINYGDLGFLGPEDLR	A0A087X054	N-Term(Dimethyl)	2754.29	0.812021	0.989901	0.82123	0	0
EHAPSIIFMDEIDSIGSSR	P62195	N-Term(Dimethyl)	2132.02	1.05978	0.993042	1.06841	0	0
MDIDAPDVDVHGPDWHLK	Q09666	N-Term(Dimethyl); K18(Dimethyl)	2116.01				0	0
CLHVVTEAVTPLGIYLK	E9PS17	N-Term(Dimethyl); C1(Carbamidomethyl); K17(Dimethyl)	1969.12				0	0
CLELFSELAEDKENYKK	P08238	N-Term(Dimethyl); C1(Carbamidomethyl); K12(Dimethyl); K16(Dimethyl); K17(Dimethyl)	2228.14				0	2
SVFDIPIFTEEFLNHSK	Q9NP66	N-Term(Dimethyl); K17(Dimethyl)	2079.07				0	0
IINEPTAAAIAYGLDKR	P11021	N-Term(Dimethyl); K16(Dimethyl)	1872.05				0	1
QLGTAYVSATTGAVATALGLK	A0A0A0MS41	N-Term(Dimethyl); K21(Dimethyl)	2049.15				0	0
ASMENQPHSKPLPSDIAVIMYTSGSTGLPK	O95573	N-Term(Dimethyl); K10(Dimethyl); K30(Dimethyl)	3240.66	1.91236			0	0
SLYQSAGVAPESFEYIEAHGTGTK	P49327	N-Term(Dimethyl); K24(Dimethyl)	2598.26	1.97417			0	0
TITLEVEPSDTIENVK	P62979;J3QRK5	N-Term(Dimethyl); K16(Dimethyl)	1843.98				0	0
DATNVGDEGGFAPNILENK	P06733	N-Term(Dimethyl); K19(Dimethyl)	2016.98				0	0
VNVTHKEEIILTPIEVAIEDMQK	Q96N67	N-Term(Dimethyl); K6(Dimethyl); K23(Dimethyl)	2733.5	0.857986	0.805719	1.06607	0	1
GIFEALRPLETLPVEGLIR	Q14204	N-Term(Dimethyl)	2151.25				0	0
SLSNVIAHEISHSWTGNLVTNK	P09960	N-Term(Dimethyl); N4(Deamidated); K22(Dimethyl)	2464.3				0	0
HWPFMVVNDAGRPK	P11142	N-Term(Dimethyl); K14(Dimethyl)	1709.89				0	0
NLDKEYLPIGGLAEFCK	P00505	N-Term(Dimethyl); K4(Dimethyl); C16(Carbamidomethyl); K17(Dimethyl)	2051.08	1.25857	1.17259	1.07454	0	1
ISDSVLVDIKDTEPLIQTAK	P48643	N-Term(Dimethyl); K10(Dimethyl); K20(Dimethyl)	2269.28	1.226	1.06829	1.14892	0	1
NATNVEQSFMTMAAEIK	P62820	N-Term(Dimethyl); K17(Dimethyl)	1940.94				0	0
QNVAYEYLCHLEEAKR	P46940	N-Term(Dimethyl); C9(Carbamidomethyl); K15(Dimethyl)	2079.03				0	1
LSFTSVGSITSGYSQSSQVFGR	P07196	N-Term(Dimethyl)	2323.15	2.62456	1.84094	1.42727	0	0
MCLAADVPLIESGTAGYLGQVTTIK	Q9UBT2	N-Term(Dimethyl); C2(Carbamidomethyl); K25(Dimethyl)	2664.39				0	0
LRKDDPLTNLNTAFDVAEK	P12814	N-Term(Dimethyl); K3(Dimethyl); K19(Dimethyl)	2244.21				0	2
LNEHFLNTTDFLDTIK	P48735	N-Term(Dimethyl); K16(Dimethyl)	1977.03	1.57664	1.69276	0.932448	0	0
AEASSGDHPTDTEMKEEQK	Q02790	N-Term(Dimethyl); K15(Dimethyl); K19(Dimethyl)	2173.98	0.995059	1.20595	0.826052	0	1
EAHSDENPSEGDGAVNKEEK	E9PMR6	N-Term(Dimethyl); K17(Dimethyl); K20(Dimethyl)	2226	1.2018	1.11211	1.08187	0	1
VGHSTAHDEIIPMSIR	F5H1S8	N-Term(Dimethyl)	1790.92	0.896387	1.00328	0.894458	0	0
DINAYNCEEPTEKLPFPIIDDR	P30041	N-Term(Dimethyl); C7(Carbamidomethyl); K13(Dimethyl)	2705.31	0.802932	0.828149	0.970642	0	1
LFTLPLLHYLEVSGCGSLR	Q8N1G4	N-Term(Dimethyl); C15(Carbamidomethyl)	2203.19	0.891928	1.36952	0.652005	0	0
SSFDWLTGSSTDPLVDHTSPSSDSLLFAHK	P78527	N-Term(Dimethyl); K30(Dimethyl)	3290.58				0	0
YLLSQSSPAPLTAAEEELR	Q12792	N-Term(Dimethyl)	2103.09				0	0
VIISAPSADAPMFVMGVNHEKYDNSLK	P04406	N-Term(Dimethyl); M12(Oxidation); K21(Dimethyl); K27(Dimethyl)	3033.55	0.786805	0.851203	0.925387	0	1
AGKPVICATQMLESMIK	P14618;H3BR70	N-Term(Dimethyl); K3(Dimethyl); C7(Carbamidomethyl); M15(Oxidation); K17(Dimethyl)	1977.05				0	0
DLISHDEMFSDIYK	P13693	N-Term(Dimethyl); K14(Dimethyl)	1768.84	1.1077	0.982007	1.12927	0	0
GISCMNTTLSESPFK	Q15181	N-Term(Dimethyl); C4(Carbamidomethyl); K15(Dimethyl)	1727.83	0.824895	0.981283	0.841576	0	0
RPLDDGVGNQLGALVHQR	Q96I24	N-Term(Dimethyl)	1973.07	1.10121	1.16052	0.949966	0	0
CFLEADPYIDIDQNVLHR	Q6YHK3	N-Term(Dimethyl); C1(Carbamidomethyl)	2246.09				0	0
LTTPTYGDLNHLVSATMSGVTTCLR	Q9BVA1;Q13885;P07437;P68371;P04350	N-Term(Dimethyl); N10(Deamidated); C23(Carbamidomethyl)	2737.35				0	0
SPEEGAETPVYLALLPPDAEGPHGQFVSEK	P16152	N-Term(Dimethyl); K30(Dimethyl)	3220.6	0.549519	0.787574	0.698523	0	0
AFREEFGAEPELAVSAPGR	P51570	N-Term(Dimethyl)	2061.03	0.803627	0.922928	0.871717	0	1
HGLEVIYMIEPIDEYCVQQLK	P07900	N-Term(Dimethyl); C16(Carbamidomethyl); K21(Dimethyl)	2633.33	0.736791	0.827473	0.891414	0	0
LHEEEIQELQAQIQEQHVQIDVDVSKPDLTAALR	P08670	N-Term(Dimethyl); Q12(Deamidated); K26(Dimethyl)	3980.08				0	0
EFNEDGALAVLQQFK	O60506	N-Term(Dimethyl); K15(Dimethyl)	1764.91	1.07205	1.01892	1.05332	0	0
LRQEEPQSLQAAVR	P29590	N-Term(Dimethyl)	1652.91	0.431265	0.76509	0.564313	0	1
LVEYDIDEVVYDEDSPYQNIK	P52788	N-Term(Dimethyl); K21(Dimethyl)	2602.23	0.752959	0.642787	1.17272	0	0
LVDEPGHCADFHPSGTVVAIGTHSGR	Q9HC35	N-Term(Dimethyl); C8(Carbamidomethyl)	2744.32	1.35855	1.12694	1.20688	0	0
MTLSNPSELDELMSEEAYEK	P23434	N-Term(Dimethyl); K20(Dimethyl)	2372.08				0	0
VLILDEATSALDVQCEQALQDWNSR	Q03519	N-Term(Dimethyl); Q14(Deamidated); C15(Carbamidomethyl)	2903.42				0	0
LGAGYPMGPFELLDYVGLDTTK	Q16836	N-Term(Dimethyl); K22(Dimethyl)	2413.23	0.759001	0.474416	1.60167	0	0
VSYPLCFIFSSPVGCKPEQQMMYAGSK	P60983	N-Term(Dimethyl); C6(Carbamidomethyl); C15(Carbamidomethyl); K16(Dimethyl); K27(Dimethyl)	3195.53				0	0
SAEKEISLWFKPEELVDYK	Q32Q12	N-Term(Dimethyl); K4(Dimethyl); K11(Dimethyl); K19(Dimethyl)	2423.3				0	1
MKEEVPTALVEAHVR	Q8TAQ2	N-Term(Dimethyl); K2(Dimethyl)	1764.96	0.976488	1.00953	0.968363	0	1
LVIGQNGILSTPAVSCIIR	P36871	N-Term(Dimethyl); C16(Carbamidomethyl)	2039.17	0.40984	0.589538	0.695973	0	0
SANPPHTIQASEEQSSTPAPVKK	B7Z524	N-Term(Dimethyl); K22(Dimethyl); K23(Dimethyl)	2488.29				0	1
TPSAAYLWVGTGASEAEK	A0A0A0MS51	N-Term(Dimethyl); K18(Dimethyl)	1893.95	0.493337	0.684404	0.919263	0	0
IEIPIHIVPHVTIGK	A0A087WZR3	N-Term(Dimethyl); K15(Dimethyl)	1722.06	0.917022	0.837986	1.09555	0	0
LSSLIILMPHHVEPLER	P50454	N-Term(Dimethyl)	2012.13	1.03499	1.01669	0.988302	0	0
FFRPHFLQAPGDLTVQEGK	Q8WX93	N-Term(Dimethyl); K19(Dimethyl)	2243.19	1.33282	1.25066	1.0669	0	0
LVSNHSLHETSSVFVDSLTK	P21333	N-Term(Dimethyl); K20(Dimethyl)	2256.18				0	0
GLVEPVDVVDNADGTQTVNYVPSR	P21333	N-Term(Dimethyl)	2572.28	1.61622	1.24044	1.3044	0	0
TCVHTFFDHQDQVWGVK	Q9GZS3	N-Term(Dimethyl); C2(Carbamidomethyl); K17(Dimethyl)	2160.02	1.08335	0.874184	1.24066	0	0
EMEENFAVEAANYQDTIGR	P08670	N-Term(Dimethyl); M2(Oxidation)	2231				0	0
GSTGFGQDSILSLPGNVGHQDVK	P13798	N-Term(Dimethyl); K23(Dimethyl)	2369.2				0	0
LIKDDFLQQNGYTPYDR	P38606	N-Term(Dimethyl); K3(Dimethyl); N10(Deamidated)	2143.06	0.923904	0.991409	0.93296	0	1
QTQAASASQGSASAAEVLLR	Q969V3	N-Term(Dimethyl)	1974.02				0	0
ITKPGSIDSNNQLFAPGGR	E7EX73	N-Term(Dimethyl); K3(Dimethyl)	2028.08	0.362721	1.13148	1.04024	0	0
MAVTFIGNSTAIQELFKR	P07437	N-Term(Dimethyl); K17(Dimethyl)	2082.14				0	1
IDTHNIIVNQLVFPDPEKPCK	A0A087WXS7	N-Term(Dimethyl); K18(Dimethyl); C20(Carbamidomethyl); K21(Dimethyl)	2561.38				0	0
AMTTGAIAAMLSTILYSR	P20618	N-Term(Dimethyl)	1899.01	1.07522			0	0
QLASGLLLVTGPLVLNR	Q02878	N-Term(Dimethyl)	1792.1				0	0
YGDSEFTVQSTTGHCVHMR	P52597	N-Term(Dimethyl); Q9(Deamidated); C15(Carbamidomethyl)	2240.98				0	0
GSFSEQGINEFLR	Q15084	N-Term(Dimethyl)	1511.74	0.939818	1.0561	0.8909	0	0
AVTEQGHELSNEER	P31946	N-Term(Dimethyl)	1626.77	0.999202	0.962801	1.03898	0	0
ITLPVDFVTADKFDENAK	P00558	N-Term(Dimethyl); K12(Dimethyl); K18(Dimethyl)	2107.13	0.464687	0.581729	0.626068	0	1
AAVPSGASTGIYEALELR	P13929;P09104;P06733	N-Term(Dimethyl)	1832.97				0	0
SPITGNDLSPPVSFNLMFK	P41250	N-Term(Dimethyl); K19(Dimethyl)	2120.1				0	0
SSILLDVKPWDDETDMAKLEECVR	P24534	N-Term(Dimethyl); K8(Dimethyl); K18(Dimethyl); C22(Carbamidomethyl)	2933.45				0	1
AINCPEDIVFPALDILR	Q9Y263	N-Term(Dimethyl); C4(Carbamidomethyl)	1984.05	0.736198	0.928537	0.793751	0	0
DATNVGDEGGFAPNILENKEGLELLK	P06733	N-Term(Dimethyl); K19(Dimethyl); K26(Dimethyl)	2827.46				0	1
EGPIDLGACNQDDWISAVRPVIEK	Q9Y5K5	N-Term(Dimethyl); C9(Carbamidomethyl); K24(Dimethyl)	2738.37	1.32284	1.3711	0.965886	0	0
SDSFENPVLQQHFR	P12956	N-Term(Dimethyl)	1731.84	1.28121	1.09625	1.17004	0	0
SGYHQSASEHGLVVIAPDTSPR	P10768	N-Term(Dimethyl)	2336.15	0.749627	0.855839	0.876884	0	0
FGNPLLVQDVESYDPVLNPVLNR	Q14204	N-Term(Dimethyl)	2626.38	1.41663	1.03161	1.37477	0	0
ESKKEDLVFIFWAPESAPLK	G3V1A4;Q9Y281	N-Term(Dimethyl); K3(Dimethyl); K4(Dimethyl); K20(Dimethyl)	2446.36				0	2
VGAIPANALDDGQWSQGLISAAR	Q9Y490	N-Term(Dimethyl); N7(Deamidated)	2339.21				0	0
WNTEDKVSHVSTGGGASLELLEGK	P00558;P07205	N-Term(Dimethyl); K6(Dimethyl); K24(Dimethyl)	2598.34				0	1
QLLCDLVGISPSSEHDVLK	Q9UDR5	N-Term(Dimethyl); C4(Carbamidomethyl); K19(Dimethyl)	2166.14				0	0
GSSGGGCFGGSSGGYGGLGGFGGGSFR	P13645	N-Term(Dimethyl); C7(Carbamidomethyl)	2371.01				0	0
DVHNIYGLYVHMATADGLR	Q14697;E9PKU7	N-Term(Dimethyl)	2173.08				0	0
EKANGTTVHVGIHPSK	J3QQQ9	N-Term(Dimethyl); K2(Dimethyl); N4(Deamidated); K16(Dimethyl)	1759.97	1.49575	1.60929	0.930495	0	1
MKPWFEVGDENSGWSAQK	O60763	N-Term(Dimethyl); K2(Dimethyl); K18(Dimethyl)	2180.04				0	0
IGEWELIQESGVPLKPLFGPGYTGIR	P45974	N-Term(Dimethyl); K15(Dimethyl)	2912.58	0.752879	0.9302	0.810286	0	0
VVLPCSVQEYQVGQLYSVAEASK	P48739	N-Term(Dimethyl); C5(Carbamidomethyl); K23(Dimethyl)	2610.35	1.12912	1.54767	0.730385	0	0
LVTSIGDVVNHDPVVGDR	P11216	N-Term(Dimethyl)	1920.01	1.3664	1.12585	1.21503	0	0
LNATNIELATVQPGQNFHMFTK	P28066	N-Term(Dimethyl); K22(Dimethyl)	2530.31				0	0
TGAICAIDYTWNLLK	Q05209	N-Term(Dimethyl); C5(Carbamidomethyl); K15(Dimethyl)	1794.94				0	0
NNPAIVIIGNNGQIHYDHQNDGASQALASCQR	P49257	N-Term(Dimethyl); C30(Carbamidomethyl)	3503.69				0	0
QNAQCLHGDIAQSQR	A0A087WVC1	N-Term(Dimethyl); C5(Carbamidomethyl)	1753.84	1.2968	1.24383	1.04376	0	0
TPQQTSASQQMLNFPDKGK	Q8TAQ2	N-Term(Dimethyl); K17(Dimethyl); K19(Dimethyl)	2190.12				0	1
AFGFSHLEALLDDSK	Q96FW1	N-Term(Dimethyl); K15(Dimethyl)	1705.87	0.719819	0.914724	0.787811	0	0
QSLGELIGTLNAAK	P60174	N-Term(Dimethyl); K14(Dimethyl)	1470.85	0.57244	0.73062	0.77256	0	0
EEEEFNTGPLSVLTQSVK	P62316	N-Term(Dimethyl); K18(Dimethyl)	2063.05	0.960917	1.60498	0.599383	0	0
LKVPPAINQFTQALDR	P62424	N-Term(Dimethyl); K2(Dimethyl)	1867.07	1.25097	1.0845	1.1548	0	1
CPEALFQPSFLGMESCGIHETTFNSIMK	P60709	N-Term(Dimethyl); C1(Carbamidomethyl); C16(Carbamidomethyl); M27(Oxidation); K28(Dimethyl)	3303.51	1.2237	1.14548	1.06949	0	0
ALQSGQCAGAALDVFTEEPPRDR	O43175	N-Term(Dimethyl); C7(Carbamidomethyl)	2516.2	4.56397	1.90068	2.40394	0	1
AIKVEQATKPSFESGR	P38159	N-Term(Dimethyl); K3(Dimethyl); K9(Dimethyl)	1832.03	0.938308	0.926653	1.01587	0	1
SCSFTAACCSHFSSVLAQNR	P13489	N-Term(Dimethyl); C2(Carbamidomethyl); C8(Carbamidomethyl); C9(Carbamidomethyl)	2318.01	0.706783	0.898008	0.787943	0	0
LLFGHSTEGDILELVDGHFDTK	A0A087WTH0	N-Term(Dimethyl); K22(Dimethyl)	2499.27	0.755572	1.03746	0.729107	0	0
WAESVPEEAPGFSNTSLIILHQLEDK	Q8WUM0	N-Term(Dimethyl); K26(Dimethyl)	2966.51				0	0
ISVNNVLPVFDNLMQQK	P07339	N-Term(Dimethyl); K17(Dimethyl)	2015.09	0.508512	0.682431	0.745988	0	0
[truncated: 71,953 more rows]

## Sheet: Table S3
Table S3. Total identified proteins in the forward dimethyl labeling experiment.
[truncated: 4,892 more rows]

[truncated: 2 more sheets: Table S4, Table S5]
